# Supplementary material for: Adipose tissue-derived PRXL2A suppresses hepatic lipogenesis
Source: Research Square preprint supplement (doi:10.21203/rs.3.rs-5055933/v1), 2024-09-17
Supplement: Supplementary file 1 [file c6d2cff8dc5dd8eff0fd093d.xlsx]

## Sheet: Band 1
Table S1. Plasma protein identification by LC-MS/MS
Accession	Description	Score Sequest HT	Coverage [%]	# Peptides	# PSMs	# Unique Peptides	# AAs	MW [kDa]	calc. pI
P07759	Serine protease inhibitor A3K OS=Mus musculus OX=10090 GN=Serpina3k PE=1 SV=2	78.34	27	9	27	9	418	46.9	5.16
	Sequence	Modifications	# Protein Groups	# Proteins	# PSMs	Master Protein Accessions	# Missed Cleavages	Theo. MH+ [Da]	m/z [Da] (by Search Engine): Sequest HT
	ALYQTEAFTADFQQPTEAK		1	1	1	P07759	0	2159.03	720.35
	AVLDVAETGTEAAAATGVIGGIR		1	1	18	P07759	0	2142.14	714.726
	AVLDVAETGTEAAAATGVIGGIRK		1	1	1	P07759	1	2270.24	757.417
	DLQILAEFHEK		1	2	1	P07759	0	1342.7	671.858
	ISFDPQDTFESEFYLDEK		1	2	1	P07759	0	2209.98	1105.49
	ISFDPQDTFESEFYLDEKR		1	2	1	P07759	1	2366.08	1183.55
	LSVSQVVHK		1	1	1	P07759	0	996.584	498.797
	MQQVEASLQPETLR		1	6	1	P07759	0	1629.83	815.421
	MQQVEASLQPETLR	1xOxidation [M1]	1	6	1	P07759	0	1645.82	823.421
	YTGNASALLILPDQGR		1	1	1	P07759	0	1688.9	844.956
P07724	Albumin OS=Mus musculus OX=10090 GN=Alb PE=1 SV=3	64.36	16	7	24	7	608	68.6	6.07
	Sequence	Modifications	# Protein Groups	# Proteins	# PSMs	Master Protein Accessions	# Missed Cleavages	Theo. MH+ [Da]	m/z [Da] (by Search Engine): Sequest HT
	DVFLGTFLYEYSR		1	1	4	P07724	0	1609.79	805.402
	ENPTTFMGHYLHEVAR		1	1	1	P07724	0	1901.9	634.64
	ENPTTFMGHYLHEVAR	1xOxidation [M7]	1	1	2	P07724	0	1917.89	639.975
	GLVLIAFSQYLQK		1	1	7	P07724	0	1479.86	740.437
	LGEYGFQNAILVR		1	1	4	P07724	0	1479.8	740.405
	RHPDYSVSLLLR		1	1	2	P07724	1	1455.81	485.942
	YNDLGEQHFKGLVLIAFSQYLQK		1	1	1	P07724	1	2711.42	678.613
	YTQKAPQVSTPTLVEAAR		1	1	3	P07724	1	1960.05	654.024
Q00897	Alpha-1-antitrypsin 1-4 OS=Mus musculus OX=10090 GN=Serpina1d PE=1 SV=1	64.13	41	18	19	5	413	46	5.44
	Sequence	Modifications	# Protein Groups	# Proteins	# PSMs	Master Protein Accessions	# Missed Cleavages	Theo. MH+ [Da]	m/z [Da] (by Search Engine): Sequest HT
	IFNNGADLSGITEENAPLK		3	4	1	P07758; P22599; Q00897	0	2003.01	1002.01
	TLMSPLGITR	1xOxidation [M3]	3	4	1	P07758; P22599; Q00897	0	1104.61	552.81
	FLEEAKNHYQAEVFSVNFAESEEAK		4	5	1	P07758; P22599; Q00898; Q00897	1	2916.37	972.801
	FLEEAKNHYQAEVFSVNFAESEEAKK		4	5	1	P07758; P22599; Q00898; Q00897	2	3044.46	761.875
	KVINDFVEK		4	5	1	P07758; P22599; Q00898; Q00897	1	1091.61	546.31
	NHYQAEVFSVNFAESEEAK		4	5	1	P07758; P22599; Q00898; Q00897	0	2199	733.675
	NHYQAEVFSVNFAESEEAKK		4	5	1	P07758; P22599; Q00898; Q00897	1	2327.09	776.375
	VINDFVEK		4	5	1	P07758; P22599; Q00898; Q00897	0	963.515	482.263
	VINDFVEKGTQGK		4	5	1	P07758; P22599; Q00898; Q00897	1	1434.76	717.886
	KLDQDTVFALANYILFK		2	3	1	P07758; Q00897	1	1999.09	667.039
	LDQDTVFALANYILFK		2	3	1	P07758; Q00897	0	1870.99	936.007
	FDHPFLFIIFEEHTQSPIFVGK		2	3	2	P22599; Q00897	0	2648.35	883.462
	IFNNGADLSGITEENAPLKLSK		2	2	1	P22599; Q00897	1	2331.22	777.747
	AVLTIDETGTEAAAATVLQVATYSMPPIVR		1	1	1	Q00897	0	3088.62	1030.22
	ELISQFLLNR		1	1	2	Q00897	0	1232.7	616.857
	LSISGNYNLKTLMSPLGITR		1	1	1	Q00897	1	2178.2	726.74
	RSDAQIHIPR		1	1	1	Q00897	1	1192.65	398.224
	SDAQIHIPR		1	1	1	Q00897	0	1036.55	518.783
Q61838	Pregnancy zone protein OS=Mus musculus OX=10090 GN=Pzp PE=1 SV=3	49.48	18	15	15	15	1495	165.7	6.68
	Sequence	Modifications	# Protein Groups	# Proteins	# PSMs	Master Protein Accessions	# Missed Cleavages	Theo. MH+ [Da]	m/z [Da] (by Search Engine): Sequest HT
	ALLAYAFALAGNK		1	1	1	Q61838	0	1322.75	661.88
	AMGVPMMGLDYSDEINQVVEVR	2xOxidation [M2; M6]	1	1	1	Q61838	0	2485.14	829.053
	APFALQVNTLPLNFDK		1	1	1	Q61838	0	1787.97	894.5
	APSAEVEMTAYVLLAYLTSESSRPTR		1	1	1	Q61838	0	2842.43	948.152
	DAVKEEDSLHWQRPGDVQK		1	1	1	Q61838	1	2237.09	560.03
	GGVDDEVTLSAYITIALLEMPLPVTHSAVR		1	1	1	Q61838	0	3167.67	1056.57
	HSLGDNDAHSIFQSVGINIFTNSK		1	1	1	Q61838	0	2601.27	867.768
	KLQDQPNIQR		1	1	1	Q61838	1	1239.68	620.346
	IFQWQNIHLAGGLHQLSFPLSVEPALGIYK		1	1	1	Q61838	0	3376.82	844.972
	LPDLPGNYVTK		1	1	1	Q61838	0	1216.66	608.836
	NRIFQWQNIHLAGGLHQLSFPLSVEPALGIYK		1	1	1	Q61838	1	3646.96	912.505
	QQNSHGGFSSTQDTVVALQALSK		1	1	1	Q61838	0	2403.19	801.739
	SELLESLNK		1	1	1	Q61838	0	1032.56	516.784
	VNTNYRPGLPFSGQVLLVDEK		1	1	1	Q61838	0	2346.25	782.757
	YGAATFTR		1	2	1	Q61838	0	886.442	443.725
P01027	Complement C3 OS=Mus musculus OX=10090 GN=C3 PE=1 SV=3	45.88	12	15	18	15	1663	186.4	6.73
	Sequence	Modifications	# Protein Groups	# Proteins	# PSMs	Master Protein Accessions	# Missed Cleavages	Theo. MH+ [Da]	m/z [Da] (by Search Engine): Sequest HT
	AAVFNHFISDGVKK		1	1	1	P01027	1	1532.82	511.614
	EPGQDLVVLSLPITPEFIPSFR		1	1	1	P01027	0	2454.33	818.786
	EYVLPSFEVR		1	1	2	P01027	0	1238.64	619.826
	FFKPAMPFDLMVFVTNPDGSPASK		1	1	1	P01027	0	2643.3	881.775
	IFTVDNNLLPVGK		1	1	1	P01027	0	1429.8	715.413
	ISLAHSLTR		1	1	1	P01027	0	997.579	499.293
	LVAYYTLIGASGQR		1	1	1	P01027	0	1511.82	756.417
	NTLIIYLEK		1	1	1	P01027	0	1106.65	553.83
	QKPDGVFQEDGPVIHQEMIGGFR		1	1	1	P01027	0	2584.26	862.097
	QIFSAEFEVK		1	1	1	P01027	0	1197.62	599.313
	QVREPGQDLVVLSLPITPEFIPSFR		1	1	1	P01027	1	2837.56	946.533
	SSVAVPYVIVPLK		1	1	1	P01027	0	1371.82	686.419
	SSVAVPYVIVPLKIGQQEVEVK		1	1	1	P01027	1	2382.36	794.797
	TVVILIETPDGIPVKR		1	1	2	P01027	1	1750.05	584.024
	VVIEDGVGDAVLTR		1	1	2	P01027	0	1442.78	721.898
P07758	Alpha-1-antitrypsin 1-1 OS=Mus musculus OX=10090 GN=Serpina1a PE=1 SV=4	45.16	33	15	15	4	413	46	5.72
	Sequence	Modifications	# Protein Groups	# Proteins	# PSMs	Master Protein Accessions	# Missed Cleavages	Theo. MH+ [Da]	m/z [Da] (by Search Engine): Sequest HT
	FDHPFLFIIFEEHTQSPIFLGK		1	1	1	P07758	0	2662.37	666.353
	LAQIHFPR		1	2	1	P07758	0	981.563	491.287
	LSISGEYNLK		1	2	1	P07758	0	1123.6	562.307
	MQHLEQTLSK		1	2	1	P07758	0	1214.62	607.817
	IFNNGADLSGITEENAPLK		3	4	1	P07758; P22599; Q00897	0	2003.01	1002.01
	TLMSPLGITR	1xOxidation [M3]	3	4	1	P07758; P22599; Q00897	0	1104.61	552.81
	FLEEAKNHYQAEVFSVNFAESEEAK		4	5	1	P07758; P22599; Q00898; Q00897	1	2916.37	972.801
	FLEEAKNHYQAEVFSVNFAESEEAKK		4	5	1	P07758; P22599; Q00898; Q00897	2	3044.46	761.875
	KVINDFVEK		4	5	1	P07758; P22599; Q00898; Q00897	1	1091.61	546.31
	NHYQAEVFSVNFAESEEAK		4	5	1	P07758; P22599; Q00898; Q00897	0	2199	733.675
	NHYQAEVFSVNFAESEEAKK		4	5	1	P07758; P22599; Q00898; Q00897	1	2327.09	776.375
	VINDFVEK		4	5	1	P07758; P22599; Q00898; Q00897	0	963.515	482.263
	VINDFVEKGTQGK		4	5	1	P07758; P22599; Q00898; Q00897	1	1434.76	717.886
	KLDQDTVFALANYILFK		2	3	1	P07758; Q00897	1	1999.09	667.039
	LDQDTVFALANYILFK		2	3	1	P07758; Q00897	0	1870.99	936.007
P22599	Alpha-1-antitrypsin 1-2 OS=Mus musculus OX=10090 GN=Serpina1b PE=1 SV=2	44.15	32	13	13	2	413	45.9	5.54
	Sequence	Modifications	# Protein Groups	# Proteins	# PSMs	Master Protein Accessions	# Missed Cleavages	Theo. MH+ [Da]	m/z [Da] (by Search Engine): Sequest HT
	IFNNGADLSGITEENAPLK		3	4	1	P07758; P22599; Q00897	0	2003.01	1002.01
	TLMSPLGITR	1xOxidation [M3]	3	4	1	P07758; P22599; Q00897	0	1104.61	552.81
	FLEEAKNHYQAEVFSVNFAESEEAK		4	5	1	P07758; P22599; Q00898; Q00897	1	2916.37	972.801
	FLEEAKNHYQAEVFSVNFAESEEAKK		4	5	1	P07758; P22599; Q00898; Q00897	2	3044.46	761.875
	KVINDFVEK		4	5	1	P07758; P22599; Q00898; Q00897	1	1091.61	546.31
	NHYQAEVFSVNFAESEEAK		4	5	1	P07758; P22599; Q00898; Q00897	0	2199	733.675
	NHYQAEVFSVNFAESEEAKK		4	5	1	P07758; P22599; Q00898; Q00897	1	2327.09	776.375
	VINDFVEK		4	5	1	P07758; P22599; Q00898; Q00897	0	963.515	482.263
	VINDFVEKGTQGK		4	5	1	P07758; P22599; Q00898; Q00897	1	1434.76	717.886
	AVLTIDETGTEAAAATVFEAVPMSMPPILR		1	1	1	P22599	0	3101.59	1034.54
	LVQIHIPR		1	1	1	P22599	0	975.61	488.311
	FDHPFLFIIFEEHTQSPIFVGK		2	3	2	P22599; Q00897	0	2648.35	883.462
	IFNNGADLSGITEENAPLKLSK		2	2	1	P22599; Q00897	1	2331.22	777.747
P28665	Murinoglobulin-1 OS=Mus musculus OX=10090 GN=Mug1 PE=1 SV=3	41.4	13	10	14	10	1476	165.2	6.42
	Sequence	Modifications	# Protein Groups	# Proteins	# PSMs	Master Protein Accessions	# Missed Cleavages	Theo. MH+ [Da]	m/z [Da] (by Search Engine): Sequest HT
	AHFSVMGDILSSAIR		1	1	1	P28665	0	1603.83	535.284
	ESVVFVQTDKPVYKPGQSVK		1	2	1	P28665	0	2235.2	745.742
	FALEIPVEFSMVPMAK		1	1	1	P28665	0	1808.93	904.976
	GGVDDEMTLSAYITMALLESSLPATHPVVSK		1	1	1	P28665	0	3232.61	1078.22
	HGIPFFVK		1	2	1	P28665	0	944.535	472.773
	LSSSDEEDFLYVDIKGPTHEFSK		1	1	1	P28665	1	2643.25	881.759
	LTAQPAPSPEDLTLSMSTIMWLTK		1	1	1	P28665	0	2631.34	877.794
	MLRPLNELLPLAYIEDPKK		1	1	2	P28665	1	2253.27	751.766
	MLRPLNELLPLAYIEDPKK	1xOxidation [M1]	1	1	1	P28665	1	2269.26	568.074
	QMSFSLAAEPIQGPYK		1	2	1	P28665	0	1766.88	883.946
	QMSFSLAAEPIQGPYK	1xOxidation [M2]	1	2	2	P28665	0	1782.87	891.949
	YMVLVPSQLYTETPEK		1	2	1	P28665	0	1897.96	949.482
P06728	Apolipoprotein A-IV OS=Mus musculus OX=10090 GN=Apoa4 PE=1 SV=3	39.42	42	12	14	12	395	45	5.47
	Sequence	Modifications	# Protein Groups	# Proteins	# PSMs	Master Protein Accessions	# Missed Cleavages	Theo. MH+ [Da]	m/z [Da] (by Search Engine): Sequest HT
	ANELKATIDQNLEDLRR		1	1	1	P06728	2	1999.06	667.026
	ATIDQNLEDLR		1	1	2	P06728	0	1287.65	644.334
	KGSPDQPQALPLPEQAQEQAQEQAQEQVQPKPLES		1	1	1	P06728	1	3851.9	963.735
	IDQLQK		1	1	1	P06728	0	744.425	372.717
	LGDASTYADGVHNK		1	1	1	P06728	0	1447.68	724.348
	LNHQMEGLAFQMK	1xOxidation [M]	1	1	2	P06728	0	1562.75	521.588
	MQTTIKENVDNLHTSMMPLATNLK		1	1	1	P06728	1	2730.36	910.797
	QQLGPNSGEVESHLSFLEK		1	1	1	P06728	0	2099.04	700.357
	SLAPLTVGVQEK		1	1	1	P06728	0	1241.71	621.361
	TDVTQQLSTLFQDK		1	1	1	P06728	0	1623.82	812.418
	TDVTQQLSTLFQDKLGDASTYADGVHNK		1	1	1	P06728	1	3052.49	763.88
	TVEPMGEMFNK	1xOxidation [M8]	1	1	1	P06728	0	1298.58	649.793
Q00898	Alpha-1-antitrypsin 1-5 OS=Mus musculus OX=10090 GN=Serpina1e PE=1 SV=1	38.95	27	13	13	6	413	45.9	5.73
	Sequence	Modifications	# Protein Groups	# Proteins	# PSMs	Master Protein Accessions	# Missed Cleavages	Theo. MH+ [Da]	m/z [Da] (by Search Engine): Sequest HT
	FLEEAKNHYQAEVFSVNFAESEEAK		4	5	1	P07758; P22599; Q00898; Q00897	1	2916.37	972.801
	FLEEAKNHYQAEVFSVNFAESEEAKK		4	5	1	P07758; P22599; Q00898; Q00897	2	3044.46	761.875
	KVINDFVEK		4	5	1	P07758; P22599; Q00898; Q00897	1	1091.61	546.31
	NHYQAEVFSVNFAESEEAK		4	5	1	P07758; P22599; Q00898; Q00897	0	2199	733.675
	NHYQAEVFSVNFAESEEAKK		4	5	1	P07758; P22599; Q00898; Q00897	1	2327.09	776.375
	VINDFVEK		4	5	1	P07758; P22599; Q00898; Q00897	0	963.515	482.263
	VINDFVEKGTQGK		4	5	1	P07758; P22599; Q00898; Q00897	1	1434.76	717.886
	KLEQDTVFVLANYILFK		1	1	1	Q00898	1	2041.14	681.054
	LAQIHIPR		1	1	1	Q00898	0	947.579	474.294
	LEQDTVFVLANYILFK		1	1	1	Q00898	0	1913.04	957.028
	IFNSGADLSGITEENAPLK		1	1	1	Q00898	0	1976	988.51
	IFNSGADLSGITEENAPLKLSQAVHK		1	1	1	Q00898	1	2739.43	685.617
	LSISGNYNLETLMSPLGITR		1	1	1	Q00898	0	2179.14	1090.08
Q61147	Ceruloplasmin OS=Mus musculus OX=10090 GN=Cp PE=1 SV=2	31.16	14	10	11	10	1061	121.1	5.85
	Sequence	Modifications	# Protein Groups	# Proteins	# PSMs	Master Protein Accessions	# Missed Cleavages	Theo. MH+ [Da]	m/z [Da] (by Search Engine): Sequest HT
	HYFIGITEAVWDYASGTEEK		1	1	2	Q61147	0	2316.08	772.701
	KLISVDTEQSNFYLQNGPDR		1	1	1	Q61147	1	2324.15	1162.58
	LISVDTEQSNFYLQNGPDR		1	1	1	Q61147	0	2196.06	732.695
	IYTFHAHGVTYTK		1	1	1	Q61147	0	1537.78	769.4
	MFTTAPDQVDKEDEDFQESNK		1	1	1	Q61147	1	2474.07	825.363
	QFEDFTVYLGER		1	1	1	Q61147	0	1503.71	752.364
	RAEDEHLGILGPPIHANVGDK		1	1	1	Q61147	1	2238.16	560.299
	SLTLLMNPDTK	1xOxidation [M6]	1	1	1	Q61147	0	1248.65	624.833
	TIDKPAWLGFLGPVIK		1	1	1	Q61147	0	1755.02	585.68
	VNKDNEEFLESNK		1	1	1	Q61147	1	1565.74	783.378
P01898	H-2 class I histocompatibility antigen, Q10 alpha chain OS=Mus musculus OX=10090 GN=H2-Q10 PE=1 SV=3	26.17	33	8	11	8	325	37.2	5.25
	Sequence	Modifications	# Protein Groups	# Proteins	# PSMs	Master Protein Accessions	# Missed Cleavages	Theo. MH+ [Da]	m/z [Da] (by Search Engine): Sequest HT
	APWMEQEGPEYWER		1	2	1	P01898	0	1807.77	904.397
	FIIVGYVDDTQFVR		1	3	1	P01898	0	1671.87	836.445
	GNEQSFHVSLR		1	1	1	P01898	0	1273.63	637.321
	GYLQYAYDGR		1	1	2	P01898	0	1205.56	603.285
	KWEQAGAAEYYR		1	2	1	P01898	1	1471.7	736.354
	TDPPKTHVTHHPGSEGDVTLR		1	1	1	P01898	1	2281.13	761.051
	TWTAADVAAIITR		1	1	1	P01898	0	1388.75	694.884
	YLELGKETLLR		1	1	3	P01898	1	1334.77	445.595
P41317	Mannose-binding protein C OS=Mus musculus OX=10090 GN=Mbl2 PE=1 SV=2	21.58	21	6	8	6	244	25.9	5.06
	Sequence	Modifications	# Protein Groups	# Proteins	# PSMs	Master Protein Accessions	# Missed Cleavages	Theo. MH+ [Da]	m/z [Da] (by Search Engine): Sequest HT
	AEFDTSEIDSEIAALRSELR		1	1	1	P41317	1	2252.1	751.375
	DIAYLGITDVR		1	1	1	P41317	0	1235.66	618.343
	GDRAEFDTSEIDSEIAALR		1	1	2	P41317	1	2094.99	699.005
	GDRGDRAEFDTSEIDSEIAALR		1	1	1	P41317	2	2423.14	606.543
	VAKDIAYLGITDVR		1	1	2	P41317	1	1533.86	767.437
	VEGSFEDLTGNR		1	1	1	P41317	0	1323.62	662.316
Q06890	Clusterin OS=Mus musculus OX=10090 GN=Clu PE=1 SV=1	21.48	15	7	8	7	448	51.6	5.67
	Sequence	Modifications	# Protein Groups	# Proteins	# PSMs	Master Protein Accessions	# Missed Cleavages	Theo. MH+ [Da]	m/z [Da] (by Search Engine): Sequest HT
	ASGIIDTLFQDR		1	1	2	Q06890	0	1335.69	668.353
	ASGIIDTLFQDRFFAR		1	1	1	Q06890	1	1856.97	619.663
	KSLLNSLEEAKK		1	1	1	Q06890	2	1359.78	453.934
	IDSLLESDRQQSQVLDAMQDSFAR		1	1	1	Q06890	1	2752.32	918.116
	QQSQVLDAMQDSFAR		1	1	1	Q06890	0	1723.81	862.409
	SLLNSLEEAK		1	1	1	Q06890	0	1103.59	552.306
	YINKEIQNAVQGVK		1	1	1	Q06890	1	1603.88	802.445
Q00623	Apolipoprotein A-I OS=Mus musculus OX=10090 GN=Apoa1 PE=1 SV=2	20.32	25	8	8	8	264	30.6	5.73
	Sequence	Modifications	# Protein Groups	# Proteins	# PSMs	Master Protein Accessions	# Missed Cleavages	Theo. MH+ [Da]	m/z [Da] (by Search Engine): Sequest HT
	DFANVYVDAVK		1	1	1	Q00623	0	1240.62	620.816
	HSLMPMLETLK		1	1	1	Q00623	0	1299.68	650.346
	QKVAPLGAELQESAR		1	1	1	Q00623	1	1596.87	798.942
	SNPTLNEYHTR		1	1	1	Q00623	0	1331.63	666.323
	TQVQSVIDK		1	1	1	Q00623	0	1017.56	509.283
	TQVQSVIDKASETLTAQ		1	1	1	Q00623	1	1818.94	909.979
	VAPLGAELQESAR		1	1	1	Q00623	0	1340.72	670.864
	VKDFANVYVDAVK		1	1	1	Q00623	1	1467.78	734.402
P23953	Carboxylesterase 1C OS=Mus musculus OX=10090 GN=Ces1c PE=1 SV=4	18.92	19	7	7	7	554	61	5.06
	Sequence	Modifications	# Protein Groups	# Proteins	# PSMs	Master Protein Accessions	# Missed Cleavages	Theo. MH+ [Da]	m/z [Da] (by Search Engine): Sequest HT
	AEEVAFWTELLAK		1	1	1	P23953	0	1506.78	753.899
	AISESGVVINTNVGK		1	1	1	P23953	0	1487.81	744.41
	AISESGVVINTNVGKK		1	1	1	P23953	1	1615.9	808.458
	LGIWGLFSTGDEHSPGNWAHLDQLAALR		1	1	1	P23953	0	3061.53	1021.18
	MNEETASLLLR		1	1	1	P23953	0	1276.66	638.835
	YISLEGFEQPVAVFLGVPFAKPPLGSLR		1	1	1	P23953	0	3031.67	1011.24
	YRPSFVSDK		1	1	1	P23953	0	1098.56	549.785
P63260	Actin, cytoplasmic 2 OS=Mus musculus OX=10090 GN=Actg1 PE=1 SV=1	18.32	17	3	6	3	375	41.8	5.48
	Sequence	Modifications	# Protein Groups	# Proteins	# PSMs	Master Protein Accessions	# Missed Cleavages	Theo. MH+ [Da]	m/z [Da] (by Search Engine): Sequest HT
	DLYANTVLSGGTTMYPGIADR		1	2	1	P63260	0	2215.07	1108.05
	LCYVALDFEQEMATAASSSSLEK	1xCarbamidomethyl [C2]	1	2	2	P63260	0	2550.17	850.734
	LCYVALDFEQEMATAASSSSLEK	1xCarbamidomethyl [C2]; 1xOxidation [M12]	1	2	1	P63260	0	2566.17	856.07
	MEEEIAALVIDNGSGMCK	1xCarbamidomethyl [C17]; 1xMet-loss+Acetyl [N-Term]	1	1	1	P63260	0	1877.86	939.443
	MEEEIAALVIDNGSGMCK	1xCarbamidomethyl [C17]; 1xOxidation [M16]; 1xMet-loss+Acetyl [N-Term]	1	1	1	P63260	0	1893.86	947.43
P06151	L-lactate dehydrogenase A chain OS=Mus musculus OX=10090 GN=Ldha PE=1 SV=3	16.62	17	3	4	3	332	36.5	7.74
	Sequence	Modifications	# Protein Groups	# Proteins	# PSMs	Master Protein Accessions	# Missed Cleavages	Theo. MH+ [Da]	m/z [Da] (by Search Engine): Sequest HT
	GYTSWAIGLSVADLAESIMK		1	1	1	P06151	0	2112.07	1056.55
	LLIVSNPVDILTYVAWK		1	1	1	P06151	0	1944.12	972.569
	ITVVGVGAVGMACAISILMK	1xCarbamidomethyl [C13]	1	1	1	P06151	0	1990.09	664.036
	ITVVGVGAVGMACAISILMK	1xCarbamidomethyl [C13]; 1xOxidation [M19]	1	1	1	P06151	0	2006.08	669.372
Q9Z2U0	Proteasome subunit alpha type-7 OS=Mus musculus OX=10090 GN=Psma7 PE=1 SV=1	16.59	25	5	6	5	248	27.8	8.46
	Sequence	Modifications	# Protein Groups	# Proteins	# PSMs	Master Protein Accessions	# Missed Cleavages	Theo. MH+ [Da]	m/z [Da] (by Search Engine): Sequest HT
	AITVFSPDGHLFQVEYAQEAVK		1	2	2	Q9Z2U0	0	2449.24	817.087
	AITVFSPDGHLFQVEYAQEAVKK		1	2	1	Q9Z2U0	1	2577.33	859.786
	GKDIVVLGVEK		1	1	1	Q9Z2U0	1	1156.69	578.852
	LTVEDPVTVEYITR		1	2	1	Q9Z2U0	0	1634.86	817.943
	NYTDDAIETDDLTIK		1	1	1	Q9Z2U0	0	1726.8	863.91
P01029	Complement C4-B OS=Mus musculus OX=10090 GN=C4b PE=1 SV=3	15.42	4	5	6	5	1738	192.8	7.53
	Sequence	Modifications	# Protein Groups	# Proteins	# PSMs	Master Protein Accessions	# Missed Cleavages	Theo. MH+ [Da]	m/z [Da] (by Search Engine): Sequest HT
	AASWLTHQGSFHGAFR		1	1	2	P01029	0	1772.86	591.627
	ANSFLGQK		1	1	1	P01029	0	864.457	432.734
	ASAGLLGAHAAAITAYALTLTK		1	1	1	P01029	0	2085.17	695.732
	GTGFLSIEPLDPR		1	1	1	P01029	0	1401.74	701.378
	LLVSAGSLYPAIAR		1	1	1	P01029	0	1430.84	715.927
P63038	60 kDa heat shock protein, mitochondrial OS=Mus musculus OX=10090 GN=Hspd1 PE=1 SV=1	15.42	10	3	5	3	573	60.9	6.18
	Sequence	Modifications	# Protein Groups	# Proteins	# PSMs	Master Protein Accessions	# Missed Cleavages	Theo. MH+ [Da]	m/z [Da] (by Search Engine): Sequest HT
	AAVEEGIVLGGGCALLR	1xCarbamidomethyl [C13]	1	1	1	P63038	0	1684.91	842.961
	ALMLQGVDLLADAVAVTMGPK		1	1	1	P63038	0	2113.14	705.055
	ALMLQGVDLLADAVAVTMGPK	1xOxidation [M]	1	1	2	P63038	0	2129.13	710.387
	KPLVIIAEDVDGEALSTLVLNR		1	1	1	P63038	0	2365.33	789.12
Q9CYH2	Peroxiredoxin-like 2A OS=Mus musculus OX=10090 GN=Prxl2a PE=1 SV=2	15.3	11	3	5	3	218	24.4	9.17
	Sequence	Modifications	# Protein Groups	# Proteins	# PSMs	Master Protein Accessions	# Missed Cleavages	Theo. MH+ [Da]	m/z [Da] (by Search Engine): Sequest HT
	AALEYLEDIDLK		1	1	2	Q9CYH2	0	1392.73	696.87
	KAALEYLEDIDLK		1	1	2	Q9CYH2	1	1520.82	760.92
	VNPLSVLEAVK		1	1	1	Q9CYH2	0	1168.69	584.854
P10126	Elongation factor 1-alpha 1 OS=Mus musculus OX=10090 GN=Eef1a1 PE=1 SV=3	14.11	10	2	3	2	462	50.1	9.01
	Sequence	Modifications	# Protein Groups	# Proteins	# PSMs	Master Protein Accessions	# Missed Cleavages	Theo. MH+ [Da]	m/z [Da] (by Search Engine): Sequest HT
	NMITGTSQADCAVLIVAAGVGEFEAGISK	1xCarbamidomethyl [C11]	1	2	1	P10126	0	2909.44	970.489
	NMITGTSQADCAVLIVAAGVGEFEAGISK	1xCarbamidomethyl [C11]; 1xOxidation [M2]	1	2	1	P10126	0	2925.43	975.822
	THINIVVIGHVDSGK		1	2	1	P10126	0	1588.88	794.947
P16858	Glyceraldehyde-3-phosphate dehydrogenase OS=Mus musculus OX=10090 GN=Gapdh PE=1 SV=2	13.99	7	1	3	1	333	35.8	8.25
	Sequence	Modifications	# Protein Groups	# Proteins	# PSMs	Master Protein Accessions	# Missed Cleavages	Theo. MH+ [Da]	m/z [Da] (by Search Engine): Sequest HT
	VIHDNFGIVEGLMTTVHAITATQK		1	1	3	P16858	0	2595.36	865.796
P02535	Keratin, type I cytoskeletal 10 OS=Mus musculus OX=10090 GN=Krt10 PE=1 SV=3	12.77	8	4	5	3	570	57.7	5.11
	Sequence	Modifications	# Protein Groups	# Proteins	# PSMs	Master Protein Accessions	# Missed Cleavages	Theo. MH+ [Da]	m/z [Da] (by Search Engine): Sequest HT
	ALEESNYELEGK		1	1	1	P02535	0	1381.65	691.332
	QSLEASLAETEGR		1	1	2	P02535	0	1390.68	695.847
	QSVEADINGLR		1	2	1	P02535	0	1201.62	601.314
	VTMQNLNDR		3	6	1	Q61414; P02535; Q61781	0	1090.53	545.771
P04104	Keratin, type II cytoskeletal 1 OS=Mus musculus OX=10090 GN=Krt1 PE=1 SV=4	12.08	6	4	5	3	637	65.6	8.15
	Sequence	Modifications	# Protein Groups	# Proteins	# PSMs	Master Protein Accessions	# Missed Cleavages	Theo. MH+ [Da]	m/z [Da] (by Search Engine): Sequest HT
	SLNDKFASFIDKVR		1	1	2	P04104	2	1639.88	547.294
	TNAENEFVTIK		1	1	1	P04104	0	1265.64	633.325
	TNAENEFVTIKK		1	1	1	P04104	1	1393.73	697.372
	FLEQQNQVLQTK		3	5	1	Q6NXH9; P04104; Q6IFZ6	0	1475.79	738.399
P68369	Tubulin alpha-1A chain OS=Mus musculus OX=10090 GN=Tuba1a PE=1 SV=1	11.48	15	3	3	3	451	50.1	5.06
	Sequence	Modifications	# Protein Groups	# Proteins	# PSMs	Master Protein Accessions	# Missed Cleavages	Theo. MH+ [Da]	m/z [Da] (by Search Engine): Sequest HT
	AFVHWYVGEGMEEGEFSEAR		1	6	1	P68369	0	2330.02	777.348
	AVCMLSNTTAIAEAWAR	1xCarbamidomethyl [C3]	1	6	1	P68369	0	1864.9	932.961
	LADQCTGLQGFLVFHSFGGGTGSGFTSLLMER	1xCarbamidomethyl [C5]	1	3	1	P68369	0	3390.62	1130.89
P01663	Ig kappa chain V-III region PC 4050 OS=Mus musculus OX=10090 PE=1 SV=1	10.91	53	3	4	3	111	12	5.06
	Sequence	Modifications	# Protein Groups	# Proteins	# PSMs	Master Protein Accessions	# Missed Cleavages	Theo. MH+ [Da]	m/z [Da] (by Search Engine): Sequest HT
	ASESVDSYGNSFMHWYQQKPGQPPK		1	4	2	P01663	0	2868.3	717.833
	LLIYLASNLESGVPAR		1	6	1	P01663	0	1715.97	858.495
	NIVLTQSPASLAVSLGQR		1	2	1	P01663	0	1854.04	927.535
P80313	T-complex protein 1 subunit eta OS=Mus musculus OX=10090 GN=Cct7 PE=1 SV=1	10.58	5	2	2	2	544	59.6	7.84
	Sequence	Modifications	# Protein Groups	# Proteins	# PSMs	Master Protein Accessions	# Missed Cleavages	Theo. MH+ [Da]	m/z [Da] (by Search Engine): Sequest HT
	INALTAASEAACLIVSVDETIK	1xCarbamidomethyl [C12]	1	1	1	P80313	0	2289.2	763.74
	INALTAASEAACLIVSVDETIKNPR	1xCarbamidomethyl [C12]	1	1	1	P80313	1	2656.4	886.143
Q9D6F9	Tubulin beta-4A chain OS=Mus musculus OX=10090 GN=Tubb4a PE=1 SV=3	10.37	15	2	3	2	444	49.6	4.88
	Sequence	Modifications	# Protein Groups	# Proteins	# PSMs	Master Protein Accessions	# Missed Cleavages	Theo. MH+ [Da]	m/z [Da] (by Search Engine): Sequest HT
	FWEVISDEHGIDPTGTYHGDSDLQLER		1	2	1	Q9D6F9	0	3116.42	779.863
	VSDTVVEPYNATLSVHQLVENTDETYCIDNEALYDICFR	2xCarbamidomethyl [C27; C37]	1	5	2	Q9D6F9	0	4593.11	1149.04
Q922U2	Keratin, type II cytoskeletal 5 OS=Mus musculus OX=10090 GN=Krt5 PE=1 SV=1	9.66	6	4	4	3	580	61.7	7.75
	Sequence	Modifications	# Protein Groups	# Proteins	# PSMs	Master Protein Accessions	# Missed Cleavages	Theo. MH+ [Da]	m/z [Da] (by Search Engine): Sequest HT
	SLDLDSIIAEVK		2	4	1	P50446; Q922U2	0	1302.72	651.864
	TEAESWYQTK		1	1	1	Q922U2	0	1242.56	621.789
	TEAESWYQTKYEELQQTAGR		1	1	1	Q922U2	1	2418.12	806.715
	YEELQQTAGR		1	1	1	Q922U2	0	1194.57	597.794
P47955	60S acidic ribosomal protein P1 OS=Mus musculus OX=10090 GN=Rplp1 PE=1 SV=1	9.22	29	2	2	2	114	11.5	4.32
	Sequence	Modifications	# Protein Groups	# Proteins	# PSMs	Master Protein Accessions	# Missed Cleavages	Theo. MH+ [Da]	m/z [Da] (by Search Engine): Sequest HT
	MASVSELACIYSALILHDDEVTVTEDK	1xCarbamidomethyl [C9]; 1xMet-loss+Acetyl [N-Term]	1	1	1	P47955	0	2920.41	974.145
	MASVSELACIYSALILHDDEVTVTEDKINALIK	1xCarbamidomethyl [C9]; 1xMet-loss+Acetyl [N-Term]	1	1	1	P47955	1	3572.84	1191.62
Q61247	Alpha-2-antiplasmin OS=Mus musculus OX=10090 GN=Serpinf2 PE=1 SV=1	9.15	6	3	3	3	491	54.9	6.3
	Sequence	Modifications	# Protein Groups	# Proteins	# PSMs	Master Protein Accessions	# Missed Cleavages	Theo. MH+ [Da]	m/z [Da] (by Search Engine): Sequest HT
	LDNQDFGDHATLK		1	1	1	Q61247	0	1473.7	491.905
	LDNQDFGDHATLKR		1	1	1	Q61247	1	1629.8	543.94
	LTGKQEEDLANINQWVK		1	1	1	Q61247	1	1986.03	662.683
P01638	Ig kappa chain V-V region L6 (Fragment) OS=Mus musculus OX=10090 PE=4 SV=1	8.47	29	2	3	2	115	13	7.81
	Sequence	Modifications	# Protein Groups	# Proteins	# PSMs	Master Protein Accessions	# Missed Cleavages	Theo. MH+ [Da]	m/z [Da] (by Search Engine): Sequest HT
	ASQDINSYLSWFQQKPGK		1	1	1	P01638	0	2097.04	699.692
	MTQSPSSMYASLGER		1	2	1	P01638	0	1644.74	822.875
	MTQSPSSMYASLGER	1xOxidation [M1]	1	2	1	P01638	0	1660.73	830.872
O08677	Kininogen-1 OS=Mus musculus OX=10090 GN=Kng1 PE=1 SV=1	8.45	6	3	3	3	661	73.1	6.54
	Sequence	Modifications	# Protein Groups	# Proteins	# PSMs	Master Protein Accessions	# Missed Cleavages	Theo. MH+ [Da]	m/z [Da] (by Search Engine): Sequest HT
	ATSQVVAGTK		1	1	1	O08677	0	961.531	481.268
	EVLGHSIAQLNAENDHPFYYK		1	1	1	O08677	0	2445.18	815.736
	SGNQYMLHR		1	1	1	O08677	0	1105.52	553.266
Q9EQU5	Protein SET OS=Mus musculus OX=10090 GN=Set PE=1 SV=1	8.43	11	1	1	1	289	33.4	4.32
	Sequence	Modifications	# Protein Groups	# Proteins	# PSMs	Master Protein Accessions	# Missed Cleavages	Theo. MH+ [Da]	m/z [Da] (by Search Engine): Sequest HT
	IPNFWVTTFVNHPQVSALLGEEDEEALHYLTR		1	1	1	Q9EQU5	0	3725.86	932.228
P01837	Immunoglobulin kappa constant OS=Mus musculus OX=10090 GN=Igkc PE=1 SV=2	8.26	31	2	2	2	107	11.9	5.9
	Sequence	Modifications	# Protein Groups	# Proteins	# PSMs	Master Protein Accessions	# Missed Cleavages	Theo. MH+ [Da]	m/z [Da] (by Search Engine): Sequest HT
	DSTYSMSSTLTLTKDEYER		1	1	1	P01837	1	2227.01	1114.01
	QNGVLNSWTDQDSKDSTYSMSSTLTLTKDEYER		1	1	1	P01837	2	3799.72	950.691
Q64475	Histone H2B type 1-B OS=Mus musculus OX=10090 GN=H2bc3 PE=1 SV=3	8	12	1	3	1	126	13.9	10.32
	Sequence	Modifications	# Protein Groups	# Proteins	# PSMs	Master Protein Accessions	# Missed Cleavages	Theo. MH+ [Da]	m/z [Da] (by Search Engine): Sequest HT
	AMGIMNSFVNDIFER		1	11	1	Q64475	0	1743.82	872.418
	AMGIMNSFVNDIFER	1xOxidation [M2]	1	11	2	Q64475	0	1759.81	880.415
P84228	Histone H3.2 OS=Mus musculus OX=10090 GN=H3c15 PE=1 SV=2	7.95	24	1	1	1	136	15.4	11.27
	Sequence	Modifications	# Protein Groups	# Proteins	# PSMs	Master Protein Accessions	# Missed Cleavages	Theo. MH+ [Da]	m/z [Da] (by Search Engine): Sequest HT
	FQSSAVMALQEASEAYLVGLFEDTNLCAIHAK	1xCarbamidomethyl [C27]	1	1	1	P84228	0	3513.7	1171.9
Q61553	Fascin OS=Mus musculus OX=10090 GN=Fscn1 PE=1 SV=4	7.79	5	1	2	1	493	54.5	6.89
	Sequence	Modifications	# Protein Groups	# Proteins	# PSMs	Master Protein Accessions	# Missed Cleavages	Theo. MH+ [Da]	m/z [Da] (by Search Engine): Sequest HT
	VGKDELFALEQSCAQVVLQAANER	1xCarbamidomethyl [C13]	1	1	2	Q61553	1	2675.35	892.46
Q61781	Keratin, type I cytoskeletal 14 OS=Mus musculus OX=10090 GN=Krt14 PE=1 SV=2	7.56	7	3	3	1	484	52.8	5.17
	Sequence	Modifications	# Protein Groups	# Proteins	# PSMs	Master Protein Accessions	# Missed Cleavages	Theo. MH+ [Da]	m/z [Da] (by Search Engine): Sequest HT
	VTMQNLNDR		3	6	1	Q61414; P02535; Q61781	0	1090.53	545.771
	EVATNSELVQSGK		1	2	1	Q61781	0	1361.69	681.352
	ILNEMRDQYEK		2	2	1	Q6IFX2; Q61781	1	1438.7	719.857
P01655	Ig kappa chain V-III region PC 7132 OS=Mus musculus OX=10090 PE=1 SV=1	7.01	37	2	2	2	112	12	5.34
	Sequence	Modifications	# Protein Groups	# Proteins	# PSMs	Master Protein Accessions	# Missed Cleavages	Theo. MH+ [Da]	m/z [Da] (by Search Engine): Sequest HT
	ASESVDNYGISFMNWFQQKPGQPPK		1	2	1	P01655	0	2855.35	952.46
	LLIYAASNQGSGVPAR		1	4	1	P01655	0	1616.88	808.947
P32261	Antithrombin-III OS=Mus musculus OX=10090 GN=Serpinc1 PE=1 SV=1	7	8	3	3	3	465	52	6.46
	Sequence	Modifications	# Protein Groups	# Proteins	# PSMs	Master Protein Accessions	# Missed Cleavages	Theo. MH+ [Da]	m/z [Da] (by Search Engine): Sequest HT
	EQLQDMGLIDLFSPEK		1	1	1	P32261	0	1862.92	931.971
	FRTEDGFSLK		1	1	1	P32261	1	1199.61	600.307
	SSDLVSANR		1	1	1	P32261	0	948.475	474.742
O35737	Heterogeneous nuclear ribonucleoprotein H OS=Mus musculus OX=10090 GN=Hnrnph1 PE=1 SV=3	6.95	9	2	2	2	449	49.2	6.3
	Sequence	Modifications	# Protein Groups	# Proteins	# PSMs	Master Protein Accessions	# Missed Cleavages	Theo. MH+ [Da]	m/z [Da] (by Search Engine): Sequest HT
	VTGEADVEFATHEDAVAAMSK		1	1	1	O35737	0	2178	726.676
	YVELFLNSTAGASGGAYEHR		1	1	1	O35737	0	2142.03	714.682
P56480	ATP synthase subunit beta, mitochondrial OS=Mus musculus OX=10090 GN=Atp5f1b PE=1 SV=2	6.88	7	2	2	2	529	56.3	5.34
	Sequence	Modifications	# Protein Groups	# Proteins	# PSMs	Master Protein Accessions	# Missed Cleavages	Theo. MH+ [Da]	m/z [Da] (by Search Engine): Sequest HT
	LVLEVAQHLGESTVR		1	1	1	P56480	0	1650.92	825.966
	SLQDIIAILGMDELSEEDKLTVSR		1	1	1	P56480	1	2675.38	892.47
P20152	Vimentin OS=Mus musculus OX=10090 GN=Vim PE=1 SV=3	6.82	4	1	2	1	466	53.7	5.12
	Sequence	Modifications	# Protein Groups	# Proteins	# PSMs	Master Protein Accessions	# Missed Cleavages	Theo. MH+ [Da]	m/z [Da] (by Search Engine): Sequest HT
	LLQDSVDFSLADAINTEFK		1	1	2	P20152	0	2126.07	1063.54
P01639	Immunoglobulin kappa chain variable 9-120 OS=Mus musculus OX=10090 GN=Igkv9-120 PE=1 SV=1	6.79	28	3	3	3	130	14.3	5.48
	Sequence	Modifications	# Protein Groups	# Proteins	# PSMs	Master Protein Accessions	# Missed Cleavages	Theo. MH+ [Da]	m/z [Da] (by Search Engine): Sequest HT
	ASQDIGSSLNWLQQEPDGTIKR		1	1	1	P01639	1	2443.22	815.081
	LIYATSSLDSGVPK		1	1	1	P01639	0	1450.78	725.895
	LIYATSSLDSGVPKR		1	1	1	P01639	1	1606.88	803.948
Q6NXH9	Keratin, type II cytoskeletal 73 OS=Mus musculus OX=10090 GN=Krt73 PE=1 SV=1	6.76	4	2	3	1	539	58.9	8.09
	Sequence	Modifications	# Protein Groups	# Proteins	# PSMs	Master Protein Accessions	# Missed Cleavages	Theo. MH+ [Da]	m/z [Da] (by Search Engine): Sequest HT
	LALDIEIATYR		1	4	2	Q6NXH9	0	1277.71	639.363
	FLEQQNQVLQTK		3	5	1	Q6NXH9; P04104; Q6IFZ6	0	1475.79	738.399
P14106	Complement C1q subcomponent subunit B OS=Mus musculus OX=10090 GN=C1qb PE=1 SV=2	6.71	10	2	3	2	253	26.7	8.15
	Sequence	Modifications	# Protein Groups	# Proteins	# PSMs	Master Protein Accessions	# Missed Cleavages	Theo. MH+ [Da]	m/z [Da] (by Search Engine): Sequest HT
	VITNANENYEPR		1	1	1	P14106	0	1419.69	710.349
	VPGLYYFTYHASSR		1	1	2	P14106	0	1660.81	830.912
P84244	Histone H3.3 OS=Mus musculus OX=10090 GN=H3-3b PE=1 SV=2	6.57	24	1	1	1	136	15.3	11.27
	Sequence	Modifications	# Protein Groups	# Proteins	# PSMs	Master Protein Accessions	# Missed Cleavages	Theo. MH+ [Da]	m/z [Da] (by Search Engine): Sequest HT
	FQSAAIGALQEASEAYLVGLFEDTNLCAIHAK	1xCarbamidomethyl [C27]	1	2	1	P84244	0	3437.7	1146.58
Q6IFX2	Keratin, type I cytoskeletal 42 OS=Mus musculus OX=10090 GN=Krt42 PE=1 SV=1	6.22	5	2	2	1	452	50.1	5.16
	Sequence	Modifications	# Protein Groups	# Proteins	# PSMs	Master Protein Accessions	# Missed Cleavages	Theo. MH+ [Da]	m/z [Da] (by Search Engine): Sequest HT
	ALEEANADLEVK		1	1	1	Q6IFX2	0	1301.66	651.336
	ILNEMRDQYEK		2	2	1	Q6IFX2; Q61781	1	1438.7	719.857
P52430	Serum paraoxonase/arylesterase 1 OS=Mus musculus OX=10090 GN=Pon1 PE=1 SV=2	6.18	13	2	2	2	355	39.5	5.22
	Sequence	Modifications	# Protein Groups	# Proteins	# PSMs	Master Protein Accessions	# Missed Cleavages	Theo. MH+ [Da]	m/z [Da] (by Search Engine): Sequest HT
	GIETGAEDLEILPNGLTFFSTGLKYPGIK		1	1	1	P52430	1	3080.62	1027.56
	IFFYDAENPPGSEVLR		1	1	1	P52430	0	1853.91	927.463
P61979	Heterogeneous nuclear ribonucleoprotein K OS=Mus musculus OX=10090 GN=Hnrnpk PE=1 SV=1	5.86	9	2	2	2	463	50.9	5.54
	Sequence	Modifications	# Protein Groups	# Proteins	# PSMs	Master Protein Accessions	# Missed Cleavages	Theo. MH+ [Da]	m/z [Da] (by Search Engine): Sequest HT
	ILSISADIETIGEILKK		1	1	1	P61979	1	1843.08	615.034
	IITITGTQDQIQNAQYLLQNSVK		1	1	1	P61979	0	2589.39	863.804
P17751	Triosephosphate isomerase OS=Mus musculus OX=10090 GN=Tpi1 PE=1 SV=5	5.73	12	1	2	1	249	26.7	7.3
	Sequence	Modifications	# Protein Groups	# Proteins	# PSMs	Master Protein Accessions	# Missed Cleavages	Theo. MH+ [Da]	m/z [Da] (by Search Engine): Sequest HT
	ELASQPDVDGFLVGGASLKPEFVDIINAK		1	1	2	P17751	0	3029.58	1010.54
P24547	Inosine-5'-monophosphate dehydrogenase 2 OS=Mus musculus OX=10090 GN=Impdh2 PE=1 SV=2	5.68	6	1	1	1	514	55.8	7.28
	Sequence	Modifications	# Protein Groups	# Proteins	# PSMs	Master Protein Accessions	# Missed Cleavages	Theo. MH+ [Da]	m/z [Da] (by Search Engine): Sequest HT
	ALALGASTVMMGSLLAATTEAPGEYFFSDGIR		1	1	1	P24547	0	3247.6	1083.22
P16301	Phosphatidylcholine-sterol acyltransferase OS=Mus musculus OX=10090 GN=Lcat PE=1 SV=2	5.62	6	2	2	2	438	49.7	6.43
	Sequence	Modifications	# Protein Groups	# Proteins	# PSMs	Master Protein Accessions	# Missed Cleavages	Theo. MH+ [Da]	m/z [Da] (by Search Engine): Sequest HT
	ILASGDNQGIPILSNIK		1	1	1	P16301	0	1752.99	877
	VSNAPGVQIR		1	1	1	P16301	0	1040.58	520.797
P63101	14-3-3 protein zeta/delta OS=Mus musculus OX=10090 GN=Ywhaz PE=1 SV=1	5.61	13	2	2	2	245	27.8	4.79
	Sequence	Modifications	# Protein Groups	# Proteins	# PSMs	Master Protein Accessions	# Missed Cleavages	Theo. MH+ [Da]	m/z [Da] (by Search Engine): Sequest HT
	GIVDQSQQAYQEAFEISKK		1	1	1	P63101	1	2169.08	723.701
	SVTEQGAELSNEER		1	1	1	P63101	0	1548.71	774.865
Q9D0M0	Exosome complex exonuclease RRP42 OS=Mus musculus OX=10090 GN=Exosc7 PE=1 SV=2	5.53	8	1	1	1	291	31.8	5.19
	Sequence	Modifications	# Protein Groups	# Proteins	# PSMs	Master Protein Accessions	# Missed Cleavages	Theo. MH+ [Da]	m/z [Da] (by Search Engine): Sequest HT
	HVVDATLQEEACSLASLLVSVTSK	1xCarbamidomethyl [C12]	1	1	1	Q9D0M0	0	2557.32	853.112
P07356	Annexin A2 OS=Mus musculus OX=10090 GN=Anxa2 PE=1 SV=2	5.5	12	2	2	2	339	38.7	7.69
	Sequence	Modifications	# Protein Groups	# Proteins	# PSMs	Master Protein Accessions	# Missed Cleavages	Theo. MH+ [Da]	m/z [Da] (by Search Engine): Sequest HT
	GDLENAFLNLVQCIQNKPLYFADR	1xCarbamidomethyl [C13]	1	1	1	P07356	0	2838.42	946.823
	SALSGHLETVILGLLK		1	1	1	P07356	0	1650.98	551
O88569	Heterogeneous nuclear ribonucleoproteins A2/B1 OS=Mus musculus OX=10090 GN=Hnrnpa2b1 PE=1 SV=2	5.33	13	2	2	2	353	37.4	8.95
	Sequence	Modifications	# Protein Groups	# Proteins	# PSMs	Master Protein Accessions	# Missed Cleavages	Theo. MH+ [Da]	m/z [Da] (by Search Engine): Sequest HT
	DYFEEYGKIDTIEIITDR		1	1	1	O88569	1	2220.07	740.698
	GFGFVTFSSMAEVDAAMAARPHSIDGR		1	1	1	O88569	0	2827.33	707.591
P98086	Complement C1q subcomponent subunit A OS=Mus musculus OX=10090 GN=C1qa PE=1 SV=2	5.23	11	2	2	2	245	26	9.11
	Sequence	Modifications	# Protein Groups	# Proteins	# PSMs	Master Protein Accessions	# Missed Cleavages	Theo. MH+ [Da]	m/z [Da] (by Search Engine): Sequest HT
	QNPMTLGNVVIFDK	1xOxidation [M4]	1	1	1	P98086	0	1591.81	796.421
	RGDEVWIEKDPAK		1	1	1	P98086	2	1542.79	514.937
P62267	40S ribosomal protein S23 OS=Mus musculus OX=10090 GN=Rps23 PE=1 SV=3	5.04	19	1	1	1	143	15.8	10.49
	Sequence	Modifications	# Protein Groups	# Proteins	# PSMs	Master Protein Accessions	# Missed Cleavages	Theo. MH+ [Da]	m/z [Da] (by Search Engine): Sequest HT
	ITAFVPNDGCLNFIEENDEVLVAGFGR	1xCarbamidomethyl [C10]	1	1	1	P62267	0	2996.45	999.498
Q9DBJ1	Phosphoglycerate mutase 1 OS=Mus musculus OX=10090 GN=Pgam1 PE=1 SV=3	5.02	11	1	1	1	254	28.8	7.18
	Sequence	Modifications	# Protein Groups	# Proteins	# PSMs	Master Protein Accessions	# Missed Cleavages	Theo. MH+ [Da]	m/z [Da] (by Search Engine): Sequest HT
	HLEGLSEEAIMELNLPTGIPIVYELDK		1	1	1	Q9DBJ1	0	3023.56	1008.54
Q9CQV8	14-3-3 protein beta/alpha OS=Mus musculus OX=10090 GN=Ywhab PE=1 SV=3	4.92	14	2	2	1	246	28.1	4.83
	Sequence	Modifications	# Protein Groups	# Proteins	# PSMs	Master Protein Accessions	# Missed Cleavages	Theo. MH+ [Da]	m/z [Da] (by Search Engine): Sequest HT
	LAEQAERYDDMAAAMK		2	2	1	P61982; Q9CQV8	1	1812.83	604.949
	IEAELQDICNDVLELLDK	1xCarbamidomethyl [C9]	1	1	1	Q9CQV8	0	2130.06	1065.54
Q8R121	Protein Z-dependent protease inhibitor OS=Mus musculus OX=10090 GN=Serpina10 PE=1 SV=1	4.92	6	2	2	2	448	51.8	5.67
	Sequence	Modifications	# Protein Groups	# Proteins	# PSMs	Master Protein Accessions	# Missed Cleavages	Theo. MH+ [Da]	m/z [Da] (by Search Engine): Sequest HT
	LFSTSADLSELSAMAR		1	1	1	Q8R121	0	1698.84	849.928
	VLQQSVLEVDER		1	1	1	Q8R121	0	1414.75	707.884
P16125	L-lactate dehydrogenase B chain OS=Mus musculus OX=10090 GN=Ldhb PE=1 SV=2	4.87	10	2	2	2	334	36.5	6.05
	Sequence	Modifications	# Protein Groups	# Proteins	# PSMs	Master Protein Accessions	# Missed Cleavages	Theo. MH+ [Da]	m/z [Da] (by Search Engine): Sequest HT
	ITVVGVGQVGMACAISILGK	1xCarbamidomethyl [C13]	1	1	1	P16125	0	1973.09	658.372
	SLADELALVDVLEDK		1	1	1	P16125	0	1629.86	815.44
P68433	Histone H3.1 OS=Mus musculus OX=10090 GN=H3c11 PE=1 SV=2	4.79	24	1	1	1	136	15.4	11.12
	Sequence	Modifications	# Protein Groups	# Proteins	# PSMs	Master Protein Accessions	# Missed Cleavages	Theo. MH+ [Da]	m/z [Da] (by Search Engine): Sequest HT
	FQSSAVMALQEACEAYLVGLFEDTNLCAIHAK	2xCarbamidomethyl [C13; C27]	1	1	1	P68433	0	3586.7	718.151
P25444	40S ribosomal protein S2 OS=Mus musculus OX=10090 GN=Rps2 PE=1 SV=3	4.78	6	2	2	2	293	31.2	10.24
	Sequence	Modifications	# Protein Groups	# Proteins	# PSMs	Master Protein Accessions	# Missed Cleavages	Theo. MH+ [Da]	m/z [Da] (by Search Engine): Sequest HT
	ESEIIDFFLGASLK		1	1	1	P25444	0	1568.82	784.919
	ESEIIDFFLGASLKDEVLK		1	1	1	P25444	1	2153.14	718.389
Q61414	Keratin, type I cytoskeletal 15 OS=Mus musculus OX=10090 GN=Krt15 PE=1 SV=2	4.67	4	2	2	1	452	49.1	4.86
	Sequence	Modifications	# Protein Groups	# Proteins	# PSMs	Master Protein Accessions	# Missed Cleavages	Theo. MH+ [Da]	m/z [Da] (by Search Engine): Sequest HT
	VTMQNLNDRLASYLDKVR		1	1	1	Q61414	2	2136.12	712.715
	VTMQNLNDR		3	6	1	Q61414; P02535; Q61781	0	1090.53	545.771
P61982	14-3-3 protein gamma OS=Mus musculus OX=10090 GN=Ywhag PE=1 SV=2	4.62	11	2	2	1	247	28.3	4.89
	Sequence	Modifications	# Protein Groups	# Proteins	# PSMs	Master Protein Accessions	# Missed Cleavages	Theo. MH+ [Da]	m/z [Da] (by Search Engine): Sequest HT
	YLAEVATGEKR		1	1	1	P61982	1	1236.66	618.835
	LAEQAERYDDMAAAMK		2	2	1	P61982; Q9CQV8	1	1812.83	604.949
P50446	Keratin, type II cytoskeletal 6A OS=Mus musculus OX=10090 GN=Krt6a PE=1 SV=3	4.59	4	2	2	1	553	59.3	7.94
	Sequence	Modifications	# Protein Groups	# Proteins	# PSMs	Master Protein Accessions	# Missed Cleavages	Theo. MH+ [Da]	m/z [Da] (by Search Engine): Sequest HT
	YEELQVTAGR		1	3	1	P50446	0	1165.58	583.298
	SLDLDSIIAEVK		2	4	1	P50446; Q922U2	0	1302.72	651.864
Q01279	Epidermal growth factor receptor OS=Mus musculus OX=10090 GN=Egfr PE=1 SV=1	4.58	2	2	2	2	1210	134.8	6.86
	Sequence	Modifications	# Protein Groups	# Proteins	# PSMs	Master Protein Accessions	# Missed Cleavages	Theo. MH+ [Da]	m/z [Da] (by Search Engine): Sequest HT
	IPLENLQIIR		1	1	1	Q01279	0	1208.74	604.874
	NLQEILIGAVR		1	1	1	Q01279	0	1225.73	613.369
P14211	Calreticulin OS=Mus musculus OX=10090 GN=Calr PE=1 SV=1	4.55	7	1	1	1	416	48	4.49
	Sequence	Modifications	# Protein Groups	# Proteins	# PSMs	Master Protein Accessions	# Missed Cleavages	Theo. MH+ [Da]	m/z [Da] (by Search Engine): Sequest HT
	SGTIFDNFLITNDEAYAEEFGNETWGVTK		1	1	1	P14211	0	3268.5	1090.17
Q9QUM9	Proteasome subunit alpha type-6 OS=Mus musculus OX=10090 GN=Psma6 PE=1 SV=1	4.49	10	2	2	2	246	27.4	6.76
	Sequence	Modifications	# Protein Groups	# Proteins	# PSMs	Master Protein Accessions	# Missed Cleavages	Theo. MH+ [Da]	m/z [Da] (by Search Engine): Sequest HT
	AINQGGLTSVAVR		1	1	1	Q9QUM9	0	1285.72	643.368
	QTESTSFLEKK		1	1	1	Q9QUM9	1	1297.66	649.336
Q9D8N0	Elongation factor 1-gamma OS=Mus musculus OX=10090 GN=Eef1g PE=1 SV=3	4.46	6	1	1	1	437	50	6.74
	Sequence	Modifications	# Protein Groups	# Proteins	# PSMs	Master Protein Accessions	# Missed Cleavages	Theo. MH+ [Da]	m/z [Da] (by Search Engine): Sequest HT
	VPAFEGDDGFCVFESNAIAYYVSNEELR	1xCarbamidomethyl [C11]	1	1	1	Q9D8N0	0	3198.44	1066.82
Q6IFZ6	Keratin, type II cytoskeletal 1b OS=Mus musculus OX=10090 GN=Krt77 PE=1 SV=1	4.45	4	2	2	1	572	61.3	8.02
	Sequence	Modifications	# Protein Groups	# Proteins	# PSMs	Master Protein Accessions	# Missed Cleavages	Theo. MH+ [Da]	m/z [Da] (by Search Engine): Sequest HT
	SLDLDSIIDAVR		1	1	1	Q6IFZ6	0	1316.71	658.858
	FLEQQNQVLQTK		3	5	1	Q6NXH9; P04104; Q6IFZ6	0	1475.79	738.399
P63242	Eukaryotic translation initiation factor 5A-1 OS=Mus musculus OX=10090 GN=Eif5a PE=1 SV=2	4.44	16	1	1	1	154	16.8	5.24
	Sequence	Modifications	# Protein Groups	# Proteins	# PSMs	Master Protein Accessions	# Missed Cleavages	Theo. MH+ [Da]	m/z [Da] (by Search Engine): Sequest HT
	YDCGEEILITVLSAMTEEAAVAIK	1xCarbamidomethyl [C3]	1	1	1	P63242	0	2626.3	876.115
Q02257	Junction plakoglobin OS=Mus musculus OX=10090 GN=Jup PE=1 SV=3	4.42	4	2	2	2	745	81.7	6.14
	Sequence	Modifications	# Protein Groups	# Proteins	# PSMs	Master Protein Accessions	# Missed Cleavages	Theo. MH+ [Da]	m/z [Da] (by Search Engine): Sequest HT
	SAIVHLINYQDDAELATR		1	1	1	Q02257	0	2029.03	677.019
	TMQNTSDLDTAR		1	1	1	Q02257	0	1352.61	676.812
P51410	60S ribosomal protein L9 OS=Mus musculus OX=10090 GN=Rpl9 PE=1 SV=2	4.36	14	1	1	1	192	21.9	9.95
	Sequence	Modifications	# Protein Groups	# Proteins	# PSMs	Master Protein Accessions	# Missed Cleavages	Theo. MH+ [Da]	m/z [Da] (by Search Engine): Sequest HT
	DELILEGNDIELVSNSAALIQQATTVK		1	1	1	P51410	0	2884.51	962.181
Q8VCG4	Complement component C8 gamma chain OS=Mus musculus OX=10090 GN=C8g PE=1 SV=1	4.34	17	2	2	2	202	22.5	9.25
	Sequence	Modifications	# Protein Groups	# Proteins	# PSMs	Master Protein Accessions	# Missed Cleavages	Theo. MH+ [Da]	m/z [Da] (by Search Engine): Sequest HT
	AEATTLHAAPQGAAMAVSTFR		1	1	1	Q8VCG4	0	2101.05	1051.04
	SLPVNDSVLDVFER		1	1	1	Q8VCG4	0	1589.82	795.415
Q3TTY5	Keratin, type II cytoskeletal 2 epidermal OS=Mus musculus OX=10090 GN=Krt2 PE=1 SV=1	4.32	4	2	2	2	707	70.9	8.06
	Sequence	Modifications	# Protein Groups	# Proteins	# PSMs	Master Protein Accessions	# Missed Cleavages	Theo. MH+ [Da]	m/z [Da] (by Search Engine): Sequest HT
	GFSSGSAVVSGGSR		1	1	1	Q3TTY5	0	1254.61	627.811
	LLRDYQELMNTK		1	1	1	Q3TTY5	1	1523.79	762.397
P51910	Apolipoprotein D OS=Mus musculus OX=10090 GN=Apod PE=1 SV=1	4.29	13	2	2	2	189	21.5	4.91
	Sequence	Modifications	# Protein Groups	# Proteins	# PSMs	Master Protein Accessions	# Missed Cleavages	Theo. MH+ [Da]	m/z [Da] (by Search Engine): Sequest HT
	DILTSNGIDIEK		1	1	1	P51910	0	1317.69	659.354
	NPYLPPETITYLK		1	1	1	P51910	0	1548.83	774.923
P60843	Eukaryotic initiation factor 4A-I OS=Mus musculus OX=10090 GN=Eif4a1 PE=1 SV=1	4.26	6	1	1	1	406	46.1	5.48
	Sequence	Modifications	# Protein Groups	# Proteins	# PSMs	Master Protein Accessions	# Missed Cleavages	Theo. MH+ [Da]	m/z [Da] (by Search Engine): Sequest HT
	VVMALGDYMGASCHACIGGTNVR	2xCarbamidomethyl [C13; C16]	1	1	1	P60843	0	2439.1	813.705
P08226	Apolipoprotein E OS=Mus musculus OX=10090 GN=Apoe PE=1 SV=2	4.12	3	1	2	1	311	35.8	5.68
	Sequence	Modifications	# Protein Groups	# Proteins	# PSMs	Master Protein Accessions	# Missed Cleavages	Theo. MH+ [Da]	m/z [Da] (by Search Engine): Sequest HT
	LGADMEDLR		1	1	2	P08226	0	1019.48	510.247
P26350	Prothymosin alpha OS=Mus musculus OX=10090 GN=Ptma PE=1 SV=2	4.05	14	1	2	1	111	12.2	3.79
	Sequence	Modifications	# Protein Groups	# Proteins	# PSMs	Master Protein Accessions	# Missed Cleavages	Theo. MH+ [Da]	m/z [Da] (by Search Engine): Sequest HT
	MSDAAVDTSSEITTK	1xMet-loss+Acetyl [N-Term]	1	1	2	P26350	0	1466.69	733.85
Q8BWY3	Eukaryotic peptide chain release factor subunit 1 OS=Mus musculus OX=10090 GN=Etf1 PE=1 SV=4	4.05	6	1	1	1	437	49	5.71
	Sequence	Modifications	# Protein Groups	# Proteins	# PSMs	Master Protein Accessions	# Missed Cleavages	Theo. MH+ [Da]	m/z [Da] (by Search Engine): Sequest HT
	LVDISYGGENGFNQAIELSTEVLSNVK		1	1	1	Q8BWY3	0	2896.46	966.165
O35955	Proteasome subunit beta type-10 OS=Mus musculus OX=10090 GN=Psmb10 PE=1 SV=1	3.99	7	1	1	1	273	29	6.87
	Sequence	Modifications	# Protein Groups	# Proteins	# PSMs	Master Protein Accessions	# Missed Cleavages	Theo. MH+ [Da]	m/z [Da] (by Search Engine): Sequest HT
	LPFTALGSGQGAAVALLEDR		1	1	1	O35955	0	1986.07	662.698
Q8K310	Matrin-3 OS=Mus musculus OX=10090 GN=Matr3 PE=1 SV=1	3.95	4	1	1	1	846	94.6	6.25
	Sequence	Modifications	# Protein Groups	# Proteins	# PSMs	Master Protein Accessions	# Missed Cleavages	Theo. MH+ [Da]	m/z [Da] (by Search Engine): Sequest HT
	INEAFIEMATTEDAQAAVDYYTTTPALVFGKPVR		1	1	1	Q8K310	0	3732.85	1244.96
Q62419	Endophilin-A2 OS=Mus musculus OX=10090 GN=Sh3gl1 PE=1 SV=1	3.93	9	1	1	1	368	41.5	5.72
	Sequence	Modifications	# Protein Groups	# Proteins	# PSMs	Master Protein Accessions	# Missed Cleavages	Theo. MH+ [Da]	m/z [Da] (by Search Engine): Sequest HT
	EVAETSMHNLLETDIEQVSQLSALVDAQLDYHR		1	1	1	Q62419	0	3754.82	939.465
Q03265	ATP synthase subunit alpha, mitochondrial OS=Mus musculus OX=10090 GN=Atp5f1a PE=1 SV=1	3.9	4	1	1	1	553	59.7	9.19
	Sequence	Modifications	# Protein Groups	# Proteins	# PSMs	Master Protein Accessions	# Missed Cleavages	Theo. MH+ [Da]	m/z [Da] (by Search Engine): Sequest HT
	EVAAFAQFGSDLDAATQQLLSR		1	1	1	Q03265	0	2338.17	780.064
P67778	Prohibitin 1 OS=Mus musculus OX=10090 GN=Phb1 PE=1 SV=1	3.87	9	1	1	1	272	29.8	5.76
	Sequence	Modifications	# Protein Groups	# Proteins	# PSMs	Master Protein Accessions	# Missed Cleavages	Theo. MH+ [Da]	m/z [Da] (by Search Engine): Sequest HT
	FGLALAVAGGVVNSALYNVDAGHR		1	1	1	P67778	0	2371.25	791.092
Q61990	Poly(rC)-binding protein 2 OS=Mus musculus OX=10090 GN=Pcbp2 PE=1 SV=1	3.71	6	1	1	1	362	38.2	6.79
	Sequence	Modifications	# Protein Groups	# Proteins	# PSMs	Master Protein Accessions	# Missed Cleavages	Theo. MH+ [Da]	m/z [Da] (by Search Engine): Sequest HT
	QVTITGSAASISLAQYLINVR		1	1	1	Q61990	0	2205.22	735.75
Q61937	Nucleophosmin OS=Mus musculus OX=10090 GN=Npm1 PE=1 SV=1	3.66	7	1	1	1	292	32.5	4.77
	Sequence	Modifications	# Protein Groups	# Proteins	# PSMs	Master Protein Accessions	# Missed Cleavages	Theo. MH+ [Da]	m/z [Da] (by Search Engine): Sequest HT
	DELHIVEAEAMNYEGSPIK		1	1	1	Q61937	0	2145.02	715.678
Q9R1P0	Proteasome subunit alpha type-4 OS=Mus musculus OX=10090 GN=Psma4 PE=1 SV=1	3.65	12	1	1	1	261	29.5	7.72
	Sequence	Modifications	# Protein Groups	# Proteins	# PSMs	Master Protein Accessions	# Missed Cleavages	Theo. MH+ [Da]	m/z [Da] (by Search Engine): Sequest HT
	LYQVEYAMEAIGHAGTCLGILANDGVLLAAER	1xCarbamidomethyl [C17]	1	1	1	Q9R1P0	0	3418.71	855.436
Q8R127	Saccharopine dehydrogenase-like oxidoreductase OS=Mus musculus OX=10090 GN=Sccpdh PE=1 SV=1	3.52	7	1	1	1	429	47.1	8.6
	Sequence	Modifications	# Protein Groups	# Proteins	# PSMs	Master Protein Accessions	# Missed Cleavages	Theo. MH+ [Da]	m/z [Da] (by Search Engine): Sequest HT
	MATEQRPFHLVVFGASGFTGQFVTEEVAR	1xMet-loss+Acetyl [N-Term]	1	1	1	Q8R127	0	3122.57	1041.53
P80317	T-complex protein 1 subunit zeta OS=Mus musculus OX=10090 GN=Cct6a PE=1 SV=3	3.31	3	1	1	1	531	58	7.08
	Sequence	Modifications	# Protein Groups	# Proteins	# PSMs	Master Protein Accessions	# Missed Cleavages	Theo. MH+ [Da]	m/z [Da] (by Search Engine): Sequest HT
	AQLGVQAFADALLIIPK		1	1	1	P80317	0	1768.04	884.526
P50543	Protein S100-A11 OS=Mus musculus OX=10090 GN=S100a11 PE=1 SV=1	3.29	16	1	1	1	98	11.1	5.45
	Sequence	Modifications	# Protein Groups	# Proteins	# PSMs	Master Protein Accessions	# Missed Cleavages	Theo. MH+ [Da]	m/z [Da] (by Search Engine): Sequest HT
	TEFLSFMNTELAAFTK		1	1	1	P50543	0	1849.9	925.463
Q9WVA4	Transgelin-2 OS=Mus musculus OX=10090 GN=Tagln2 PE=1 SV=4	3.25	9	1	1	1	199	22.4	8.24
	Sequence	Modifications	# Protein Groups	# Proteins	# PSMs	Master Protein Accessions	# Missed Cleavages	Theo. MH+ [Da]	m/z [Da] (by Search Engine): Sequest HT
	YGINTTDIFQTVDLWEGK		1	1	1	Q9WVA4	0	2100.03	1050.52
O70133	ATP-dependent RNA helicase A OS=Mus musculus OX=10090 GN=Dhx9 PE=1 SV=2	3.2	2	1	1	1	1380	149.4	6.83
	Sequence	Modifications	# Protein Groups	# Proteins	# PSMs	Master Protein Accessions	# Missed Cleavages	Theo. MH+ [Da]	m/z [Da] (by Search Engine): Sequest HT
	VILSTNIAETSITINDVVYVIDSCK	1xCarbamidomethyl [C24]	1	1	1	O70133	0	2767.44	923.159
P09405	Nucleolin OS=Mus musculus OX=10090 GN=Ncl PE=1 SV=2	3.17	3	1	1	1	707	76.7	4.75
	Sequence	Modifications	# Protein Groups	# Proteins	# PSMs	Master Protein Accessions	# Missed Cleavages	Theo. MH+ [Da]	m/z [Da] (by Search Engine): Sequest HT
	TLVLSNLSYSATKETLEEVFEK		1	1	1	P09405	1	2501.3	834.434
P97807	Fumarate hydratase, mitochondrial OS=Mus musculus OX=10090 GN=Fh PE=1 SV=3	3.14	4	1	1	1	507	54.3	9.04
	Sequence	Modifications	# Protein Groups	# Proteins	# PSMs	Master Protein Accessions	# Missed Cleavages	Theo. MH+ [Da]	m/z [Da] (by Search Engine): Sequest HT
	ETAIELGYLTAEQFDEWVKPK		1	1	1	P97807	0	2467.24	823.089
Q9CWJ9	Bifunctional purine biosynthesis protein ATIC OS=Mus musculus OX=10090 GN=Atic PE=1 SV=2	3.09	4	1	1	1	592	64.2	6.76
	Sequence	Modifications	# Protein Groups	# Proteins	# PSMs	Master Protein Accessions	# Missed Cleavages	Theo. MH+ [Da]	m/z [Da] (by Search Engine): Sequest HT
	TVASPDVTVEAAVEQIDIGGVTLLR		1	1	1	Q9CWJ9	0	2553.38	851.8
P62754	40S ribosomal protein S6 OS=Mus musculus OX=10090 GN=Rps6 PE=1 SV=1	3.06	7	1	1	1	249	28.7	10.84
	Sequence	Modifications	# Protein Groups	# Proteins	# PSMs	Master Protein Accessions	# Missed Cleavages	Theo. MH+ [Da]	m/z [Da] (by Search Engine): Sequest HT
	GCIVDANLSVLNLVIVK	1xCarbamidomethyl [C2]	1	1	1	P62754	0	1827.04	914.027
P29699	Alpha-2-HS-glycoprotein OS=Mus musculus OX=10090 GN=Ahsg PE=1 SV=1	3.05	6	1	1	1	345	37.3	6.51
	Sequence	Modifications	# Protein Groups	# Proteins	# PSMs	Master Protein Accessions	# Missed Cleavages	Theo. MH+ [Da]	m/z [Da] (by Search Engine): Sequest HT
	HAFSPVASVESASGETLHSPK		1	1	1	P29699	0	2138.05	713.36
Q3U1J4	DNA damage-binding protein 1 OS=Mus musculus OX=10090 GN=Ddb1 PE=1 SV=2	3.04	2	1	1	1	1140	126.8	5.26
	Sequence	Modifications	# Protein Groups	# Proteins	# PSMs	Master Protein Accessions	# Missed Cleavages	Theo. MH+ [Da]	m/z [Da] (by Search Engine): Sequest HT
	VELLGETSIAECLTYLDNGVVFVGSR	1xCarbamidomethyl [C12]	1	1	1	Q3U1J4	0	2841.43	947.822
Q9Z2X1	Heterogeneous nuclear ribonucleoprotein F OS=Mus musculus OX=10090 GN=Hnrnpf PE=1 SV=3	3.03	6	1	1	1	415	45.7	5.49
	Sequence	Modifications	# Protein Groups	# Proteins	# PSMs	Master Protein Accessions	# Missed Cleavages	Theo. MH+ [Da]	m/z [Da] (by Search Engine): Sequest HT
	EEIVQFFSGLEIVPNGITLPVDPEGK		1	1	1	Q9Z2X1	0	2827.48	943.174
Q9D554	Splicing factor 3A subunit 3 OS=Mus musculus OX=10090 GN=Sf3a3 PE=1 SV=2	2.99	6	1	1	1	501	58.8	5.34
	Sequence	Modifications	# Protein Groups	# Proteins	# PSMs	Master Protein Accessions	# Missed Cleavages	Theo. MH+ [Da]	m/z [Da] (by Search Engine): Sequest HT
	ETSSALTHAGAHLDLSAFSSWEELASLGLDR		1	1	1	Q9D554	0	3271.59	818.656
P80314	T-complex protein 1 subunit beta OS=Mus musculus OX=10090 GN=Cct2 PE=1 SV=4	2.86	5	1	1	1	535	57.4	6.4
	Sequence	Modifications	# Protein Groups	# Proteins	# PSMs	Master Protein Accessions	# Missed Cleavages	Theo. MH+ [Da]	m/z [Da] (by Search Engine): Sequest HT
	QLIYNYPEQLFGAAGVMAIEHADFAGVER		1	1	1	P80314	0	3209.57	1070.54
P62264	40S ribosomal protein S14 OS=Mus musculus OX=10090 GN=Rps14 PE=1 SV=3	2.82	26	1	1	1	151	16.3	10.05
	Sequence	Modifications	# Protein Groups	# Proteins	# PSMs	Master Protein Accessions	# Missed Cleavages	Theo. MH+ [Da]	m/z [Da] (by Search Engine): Sequest HT
	EEQVISLGPQVAEGENVFGVCHIFASFNDTFVHVTDLSGK	1xCarbamidomethyl [C21]	1	1	1	P62264	0	4377.11	1095.04
Q8C196	Carbamoyl-phosphate synthase [ammonia], mitochondrial OS=Mus musculus OX=10090 GN=Cps1 PE=1 SV=2	2.8	2	1	1	1	1500	164.5	6.92
	Sequence	Modifications	# Protein Groups	# Proteins	# PSMs	Master Protein Accessions	# Missed Cleavages	Theo. MH+ [Da]	m/z [Da] (by Search Engine): Sequest HT
	VLILGSGGLSIGQAGEFDYSGSQAVK		1	1	1	Q8C196	0	2553.32	851.785
P68040	Receptor of activated protein C kinase 1 OS=Mus musculus OX=10090 GN=Rack1 PE=1 SV=3	2.78	9	1	1	1	317	35.1	7.69
	Sequence	Modifications	# Protein Groups	# Proteins	# PSMs	Master Protein Accessions	# Missed Cleavages	Theo. MH+ [Da]	m/z [Da] (by Search Engine): Sequest HT
	AEPPQCTSLAWSADGQTLFAGYTDNLVR	1xCarbamidomethyl [C6]	1	1	1	P68040	0	3068.44	1023.49
Q02053	Ubiquitin-like modifier-activating enzyme 1 OS=Mus musculus OX=10090 GN=Uba1 PE=1 SV=1	2.77	2	1	1	1	1058	117.7	5.66
	Sequence	Modifications	# Protein Groups	# Proteins	# PSMs	Master Protein Accessions	# Missed Cleavages	Theo. MH+ [Da]	m/z [Da] (by Search Engine): Sequest HT
	IIPAIATTTAAVVGLVCLELYK	1xCarbamidomethyl [C17]	1	1	1	Q02053	0	2316.32	772.789
P62984	Ubiquitin-60S ribosomal protein L40 OS=Mus musculus OX=10090 GN=Uba52 PE=1 SV=2	2.72	13	1	1	1	128	14.7	9.83
	Sequence	Modifications	# Protein Groups	# Proteins	# PSMs	Master Protein Accessions	# Missed Cleavages	Theo. MH+ [Da]	m/z [Da] (by Search Engine): Sequest HT
	TITLEVEPSDTIENVK		1	4	1	P62984	0	1787.93	894.472
P01665	Ig kappa chain V-III region PC 7043 OS=Mus musculus OX=10090 PE=1 SV=1	2.71	14	1	1	1	111	12	4.61
	Sequence	Modifications	# Protein Groups	# Proteins	# PSMs	Master Protein Accessions	# Missed Cleavages	Theo. MH+ [Da]	m/z [Da] (by Search Engine): Sequest HT
	LLIYAASNLESGIPAR		1	4	1	P01665	0	1687.94	844.476
Q61171	Peroxiredoxin-2 OS=Mus musculus OX=10090 GN=Prdx2 PE=1 SV=3	2.68	12	1	1	1	198	21.8	5.41
	Sequence	Modifications	# Protein Groups	# Proteins	# PSMs	Master Protein Accessions	# Missed Cleavages	Theo. MH+ [Da]	m/z [Da] (by Search Engine): Sequest HT
	LGCEVLGVSVDSQFTHLAWINTPR	1xCarbamidomethyl [C3]	1	1	1	Q61171	0	2699.36	900.463
P01628	Ig kappa chain V-II region MOPC 511 OS=Mus musculus OX=10090 PE=1 SV=1	2.66	14	1	1	1	113	12.5	7.94
	Sequence	Modifications	# Protein Groups	# Proteins	# PSMs	Master Protein Accessions	# Missed Cleavages	Theo. MH+ [Da]	m/z [Da] (by Search Engine): Sequest HT
	FSGSGSGTDFTLEISR		1	2	1	P01628	0	1660.78	830.903
O70435	Proteasome subunit alpha type-3 OS=Mus musculus OX=10090 GN=Psma3 PE=1 SV=3	2.66	8	1	1	1	255	28.4	5.44
	Sequence	Modifications	# Protein Groups	# Proteins	# PSMs	Master Protein Accessions	# Missed Cleavages	Theo. MH+ [Da]	m/z [Da] (by Search Engine): Sequest HT
	MSSIGTGYDLSASTFSPDGR	1xMet-loss+Acetyl [N-Term]	1	1	1	O70435	0	1959.89	980.451
Q9CQV7	Mitochondrial import inner membrane translocase subunit TIM14 OS=Mus musculus OX=10090 GN=Dnajc19 PE=1 SV=3	2.64	17	1	1	1	116	12.4	10.1
	Sequence	Modifications	# Protein Groups	# Proteins	# PSMs	Master Protein Accessions	# Missed Cleavages	Theo. MH+ [Da]	m/z [Da] (by Search Engine): Sequest HT
	MASTVVAVGLTIAAAGFAGR	1xMet-loss+Acetyl [N-Term]	1	1	1	Q9CQV7	0	1773.99	887.509
P56399	Ubiquitin carboxyl-terminal hydrolase 5 OS=Mus musculus OX=10090 GN=Usp5 PE=1 SV=1	2.63	3	1	1	1	858	95.8	5.01
	Sequence	Modifications	# Protein Groups	# Proteins	# PSMs	Master Protein Accessions	# Missed Cleavages	Theo. MH+ [Da]	m/z [Da] (by Search Engine): Sequest HT
	AVDWIFSHIDDLDAEAAMDISEGR		1	1	1	P56399	0	2676.22	892.751
P01646	Ig kappa chain V-V region HP 123E6 OS=Mus musculus OX=10090 PE=1 SV=1	2.59	19	1	1	1	108	12	7.97
	Sequence	Modifications	# Protein Groups	# Proteins	# PSMs	Master Protein Accessions	# Missed Cleavages	Theo. MH+ [Da]	m/z [Da] (by Search Engine): Sequest HT
	ASQDISNYLNWYQQKPDGTVK		1	3	1	P01646	0	2455.19	1228.11
P07901	Heat shock protein HSP 90-alpha OS=Mus musculus OX=10090 GN=Hsp90aa1 PE=1 SV=4	2.56	3	1	1	1	733	84.7	5.01
	Sequence	Modifications	# Protein Groups	# Proteins	# PSMs	Master Protein Accessions	# Missed Cleavages	Theo. MH+ [Da]	m/z [Da] (by Search Engine): Sequest HT
	HNDDEQYAWESSAGGSFTVR		1	2	1	P07901	0	2255.96	752.661
Q64152	Transcription factor BTF3 OS=Mus musculus OX=10090 GN=Btf3 PE=1 SV=3	2.55	14	1	1	1	204	22	9.52
	Sequence	Modifications	# Protein Groups	# Proteins	# PSMs	Master Protein Accessions	# Missed Cleavages	Theo. MH+ [Da]	m/z [Da] (by Search Engine): Sequest HT
	LGVNNISGIEEVNMFTNQGTVIHFNNPK		1	1	1	Q64152	0	3086.54	1029.53
Q06770	Corticosteroid-binding globulin OS=Mus musculus OX=10090 GN=Serpina6 PE=1 SV=1	2.53	6	1	1	1	397	44.7	5.24
	Sequence	Modifications	# Protein Groups	# Proteins	# PSMs	Master Protein Accessions	# Missed Cleavages	Theo. MH+ [Da]	m/z [Da] (by Search Engine): Sequest HT
	IEHVVSDLDSSATLILINYIFLK		1	1	1	Q06770	0	2603.43	868.487
P63323	40S ribosomal protein S12 OS=Mus musculus OX=10090 GN=Rps12 PE=1 SV=3	2.44	17	1	1	1	132	14.5	7.21
	Sequence	Modifications	# Protein Groups	# Proteins	# PSMs	Master Protein Accessions	# Missed Cleavages	Theo. MH+ [Da]	m/z [Da] (by Search Engine): Sequest HT
	MAEEGIAAGGVMDVNTALQEVLK	1xOxidation [M12]; 1xMet-loss+Acetyl [N-Term]	1	1	1	P63323	0	2273.13	758.385
Q8BK67	Protein RCC2 OS=Mus musculus OX=10090 GN=Rcc2 PE=1 SV=1	2.43	4	1	1	1	520	55.9	8.72
	Sequence	Modifications	# Protein Groups	# Proteins	# PSMs	Master Protein Accessions	# Missed Cleavages	Theo. MH+ [Da]	m/z [Da] (by Search Engine): Sequest HT
	TLDGIFSEQVAMGYSHSLVIAR		1	1	1	Q8BK67	0	2394.21	798.746
Q6IME9	Keratin, type II cytoskeletal 72 OS=Mus musculus OX=10090 GN=Krt72 PE=3 SV=1	2.42	2	1	1	1	520	56.7	7.4
	Sequence	Modifications	# Protein Groups	# Proteins	# PSMs	Master Protein Accessions	# Missed Cleavages	Theo. MH+ [Da]	m/z [Da] (by Search Engine): Sequest HT
	FLEQQNQVLETK		1	1	1	Q6IME9	0	1476.77	738.893
Q8VIJ6	Splicing factor, proline- and glutamine-rich OS=Mus musculus OX=10090 GN=Sfpq PE=1 SV=1	2.31	3	1	1	1	699	75.4	9.44
	Sequence	Modifications	# Protein Groups	# Proteins	# PSMs	Master Protein Accessions	# Missed Cleavages	Theo. MH+ [Da]	m/z [Da] (by Search Engine): Sequest HT
	NLSPYVSNELLEEAFSQFGPIER		1	1	1	Q8VIJ6	0	2639.3	880.446
P11679	Keratin, type II cytoskeletal 8 OS=Mus musculus OX=10090 GN=Krt8 PE=1 SV=4	2.3	3	1	1	1	490	54.5	5.82
	Sequence	Modifications	# Protein Groups	# Proteins	# PSMs	Master Protein Accessions	# Missed Cleavages	Theo. MH+ [Da]	m/z [Da] (by Search Engine): Sequest HT
	SLNNKFASFIDKVR		1	1	1	P11679	2	1638.9	819.938
Q8R081	Heterogeneous nuclear ribonucleoprotein L OS=Mus musculus OX=10090 GN=Hnrnpl PE=1 SV=2	2.3	5	1	1	1	586	63.9	8.1
	Sequence	Modifications	# Protein Groups	# Proteins	# PSMs	Master Protein Accessions	# Missed Cleavages	Theo. MH+ [Da]	m/z [Da] (by Search Engine): Sequest HT
	IQHPSNVLHFFNAPLEVTEENFFEICDELGVK	1xCarbamidomethyl [C26]	1	1	1	Q8R081	0	3772.83	1258.3
Q8VEK3	Heterogeneous nuclear ribonucleoprotein U OS=Mus musculus OX=10090 GN=Hnrnpu PE=1 SV=1	2.26	2	1	1	1	800	87.9	6.24
	Sequence	Modifications	# Protein Groups	# Proteins	# PSMs	Master Protein Accessions	# Missed Cleavages	Theo. MH+ [Da]	m/z [Da] (by Search Engine): Sequest HT
	LSASSLTMESFAFLWAGGR		1	1	1	Q8VEK3	0	2031	1016.01
Q61646	Haptoglobin OS=Mus musculus OX=10090 GN=Hp PE=1 SV=1	2.26	6	1	1	1	347	38.7	6.29
	Sequence	Modifications	# Protein Groups	# Proteins	# PSMs	Master Protein Accessions	# Missed Cleavages	Theo. MH+ [Da]	m/z [Da] (by Search Engine): Sequest HT
	HGLTTGATLISDQWLLTTAK		1	1	1	Q61646	0	2127.14	1064.08
P01844	Ig lambda-2 chain C region OS=Mus musculus OX=10090 GN=Iglc2 PE=1 SV=1	2.22	14	1	1	1	104	11.2	6.27
	Sequence	Modifications	# Protein Groups	# Proteins	# PSMs	Master Protein Accessions	# Missed Cleavages	Theo. MH+ [Da]	m/z [Da] (by Search Engine): Sequest HT
	FMASSFLHLTSDQWR		1	1	1	P01844	0	1825.87	913.447
Q3UV17	Keratin, type II cytoskeletal 2 oral OS=Mus musculus OX=10090 GN=Krt76 PE=1 SV=1	2.2	2	1	1	1	594	62.8	8.43
	Sequence	Modifications	# Protein Groups	# Proteins	# PSMs	Master Protein Accessions	# Missed Cleavages	Theo. MH+ [Da]	m/z [Da] (by Search Engine): Sequest HT
	AQYEDIAQK		1	1	1	Q3UV17	0	1065.52	533.266
O70362	Phosphatidylinositol-glycan-specific phospholipase D OS=Mus musculus OX=10090 GN=Gpld1 PE=1 SV=1	2.18	1	1	1	1	837	93.2	7.12
	Sequence	Modifications	# Protein Groups	# Proteins	# PSMs	Master Protein Accessions	# Missed Cleavages	Theo. MH+ [Da]	m/z [Da] (by Search Engine): Sequest HT
	IYDNLYGR		1	1	1	O70362	0	1013.51	507.256
P70195	Proteasome subunit beta type-7 OS=Mus musculus OX=10090 GN=Psmb7 PE=1 SV=1	2.12	4	1	1	1	277	29.9	7.99
	Sequence	Modifications	# Protein Groups	# Proteins	# PSMs	Master Protein Accessions	# Missed Cleavages	Theo. MH+ [Da]	m/z [Da] (by Search Engine): Sequest HT
	ATEGMVVADK		1	1	1	P70195	0	1020.5	510.756
Q9Z2U1	Proteasome subunit alpha type-5 OS=Mus musculus OX=10090 GN=Psma5 PE=1 SV=1	2.12	5	1	1	1	241	26.4	4.79
	Sequence	Modifications	# Protein Groups	# Proteins	# PSMs	Master Protein Accessions	# Missed Cleavages	Theo. MH+ [Da]	m/z [Da] (by Search Engine): Sequest HT
	LFQVEYAIEAIK		1	1	1	Q9Z2U1	0	1423.78	712.399
P01674	Ig kappa chain V-III region PC 2154 OS=Mus musculus OX=10090 PE=1 SV=1	2.1	11	1	1	1	108	11.7	6.27
	Sequence	Modifications	# Protein Groups	# Proteins	# PSMs	Master Protein Accessions	# Missed Cleavages	Theo. MH+ [Da]	m/z [Da] (by Search Engine): Sequest HT
	YASNLESGVPAR		1	1	1	P01674	0	1263.63	632.325
P17182	Alpha-enolase OS=Mus musculus OX=10090 GN=Eno1 PE=1 SV=3	2.08	3	1	1	1	434	47.1	6.8
	Sequence	Modifications	# Protein Groups	# Proteins	# PSMs	Master Protein Accessions	# Missed Cleavages	Theo. MH+ [Da]	m/z [Da] (by Search Engine): Sequest HT
	VNQIGSVTESIQACK	1xCarbamidomethyl [C14]	1	2	2	P17182	0	1633.82	817.413
P01872	Immunoglobulin heavy constant mu OS=Mus musculus OX=10090 GN=Ighm PE=1 SV=2	2.08	3	1	1	1	454	49.9	7.01
	Sequence	Modifications	# Protein Groups	# Proteins	# PSMs	Master Protein Accessions	# Missed Cleavages	Theo. MH+ [Da]	m/z [Da] (by Search Engine): Sequest HT
	YLATSQVLLSPK		1	1	1	P01872	0	1319.76	660.385
E9Q414	Apolipoprotein B-100 OS=Mus musculus OX=10090 GN=Apob PE=1 SV=1	2.07	0	1	1	1	4505	509.1	6.81
	Sequence	Modifications	# Protein Groups	# Proteins	# PSMs	Master Protein Accessions	# Missed Cleavages	Theo. MH+ [Da]	m/z [Da] (by Search Engine): Sequest HT
	ITDNDVLIAIDSAK		1	1	1	E9Q414	0	1487.8	744.405
P26262	Plasma kallikrein OS=Mus musculus OX=10090 GN=Klkb1 PE=1 SV=2	2.06	2	1	1	1	638	71.3	8.02
	Sequence	Modifications	# Protein Groups	# Proteins	# PSMs	Master Protein Accessions	# Missed Cleavages	Theo. MH+ [Da]	m/z [Da] (by Search Engine): Sequest HT
	IYGGILSLSEITK		1	1	1	P26262	0	1393.79	697.403
P03987	Ig gamma-3 chain C region OS=Mus musculus OX=10090 PE=1 SV=2	2.05	3	1	1	1	398	43.9	7.14
	Sequence	Modifications	# Protein Groups	# Proteins	# PSMs	Master Protein Accessions	# Missed Cleavages	Theo. MH+ [Da]	m/z [Da] (by Search Engine): Sequest HT
	WNYGALSSGVR		1	1	1	P03987	0	1209.6	605.306
P62259	14-3-3 protein epsilon OS=Mus musculus OX=10090 GN=Ywhae PE=1 SV=1	2.05	4	1	1	1	255	29.2	4.74
	Sequence	Modifications	# Protein Groups	# Proteins	# PSMs	Master Protein Accessions	# Missed Cleavages	Theo. MH+ [Da]	m/z [Da] (by Search Engine): Sequest HT
	EAAENSLVAYK		1	1	1	P62259	0	1194.6	597.805
P01642	Ig kappa chain V-V region L7 (Fragment) OS=Mus musculus OX=10090 GN=Gm10881 PE=1 SV=1	2.03	10	1	1	1	115	12.6	5.94
	Sequence	Modifications	# Protein Groups	# Proteins	# PSMs	Master Protein Accessions	# Missed Cleavages	Theo. MH+ [Da]	m/z [Da] (by Search Engine): Sequest HT
	YASESISGIPSR		1	1	1	P01642	0	1266.63	633.82
P01843	Ig lambda-1 chain C region OS=Mus musculus OX=10090 PE=1 SV=1	2.02	11	1	1	1	105	11.6	6.27
	Sequence	Modifications	# Protein Groups	# Proteins	# PSMs	Master Protein Accessions	# Missed Cleavages	Theo. MH+ [Da]	m/z [Da] (by Search Engine): Sequest HT
	YMASSYLTLTAR		1	1	1	P01843	0	1376.69	688.851
P01634	Ig kappa chain V-V region MOPC 21 OS=Mus musculus OX=10090 PE=1 SV=1	1.96	7	1	1	1	136	14.9	6.76
	Sequence	Modifications	# Protein Groups	# Proteins	# PSMs	Master Protein Accessions	# Missed Cleavages	Theo. MH+ [Da]	m/z [Da] (by Search Engine): Sequest HT
	SMSMSVGER		1	1	1	P01634	0	983.428	492.219
Q04447	Creatine kinase B-type OS=Mus musculus OX=10090 GN=Ckb PE=1 SV=1	1.96	4	1	1	1	381	42.7	5.67
	Sequence	Modifications	# Protein Groups	# Proteins	# PSMs	Master Protein Accessions	# Missed Cleavages	Theo. MH+ [Da]	m/z [Da] (by Search Engine): Sequest HT
	LGFSEVELVQMVVDGVK		1	1	1	Q04447	0	1848.98	924.998
P17897	Lysozyme C-1 OS=Mus musculus OX=10090 GN=Lyz1 PE=1 SV=1	1.96	8	1	1	1	148	16.8	9.41
	Sequence	Modifications	# Protein Groups	# Proteins	# PSMs	Master Protein Accessions	# Missed Cleavages	Theo. MH+ [Da]	m/z [Da] (by Search Engine): Sequest HT
	STDYGIFQINSR		1	1	1	P17897	0	1400.68	700.847
Q02819	Nucleobindin-1 OS=Mus musculus OX=10090 GN=Nucb1 PE=1 SV=2	1.95	2	1	1	1	459	53.4	5.07
	Sequence	Modifications	# Protein Groups	# Proteins	# PSMs	Master Protein Accessions	# Missed Cleavages	Theo. MH+ [Da]	m/z [Da] (by Search Engine): Sequest HT
	LSQETEALGR		1	1	1	Q02819	0	1103.57	552.29
P01630	Ig kappa chain V-II region 7S34.1 OS=Mus musculus OX=10090 PE=1 SV=1	1.94	12	1	1	1	113	12.5	8.65
	Sequence	Modifications	# Protein Groups	# Proteins	# PSMs	Master Protein Accessions	# Missed Cleavages	Theo. MH+ [Da]	m/z [Da] (by Search Engine): Sequest HT
	FSGSGSGTAFTLR		1	1	1	P01630	0	1287.63	644.323
P10639	Thioredoxin OS=Mus musculus OX=10090 GN=Txn PE=1 SV=3	1.94	9	1	1	1	105	11.7	4.92
	Sequence	Modifications	# Protein Groups	# Proteins	# PSMs	Master Protein Accessions	# Missed Cleavages	Theo. MH+ [Da]	m/z [Da] (by Search Engine): Sequest HT
	VGEFSGANK		1	1	1	P10639	0	908.447	454.726
Q8VDD5	Myosin-9 OS=Mus musculus OX=10090 GN=Myh9 PE=1 SV=4	1.92	1	1	1	1	1960	226.2	5.66
	Sequence	Modifications	# Protein Groups	# Proteins	# PSMs	Master Protein Accessions	# Missed Cleavages	Theo. MH+ [Da]	m/z [Da] (by Search Engine): Sequest HT
	INFDVNGYIVGANIETYLLEK		1	1	1	Q8VDD5	0	2385.23	1193.12
P02088	Hemoglobin subunit beta-1 OS=Mus musculus OX=10090 GN=Hbb-b1 PE=1 SV=2	1.92	13	1	1	1	147	15.8	7.65
	Sequence	Modifications	# Protein Groups	# Proteins	# PSMs	Master Protein Accessions	# Missed Cleavages	Theo. MH+ [Da]	m/z [Da] (by Search Engine): Sequest HT
	YFDSFGDLSSASAIMGNAK		1	1	1	P02088	0	1980.9	990.96
P58252	Elongation factor 2 OS=Mus musculus OX=10090 GN=Eef2 PE=1 SV=2	1.92	2	1	1	1	858	95.3	6.83
	Sequence	Modifications	# Protein Groups	# Proteins	# PSMs	Master Protein Accessions	# Missed Cleavages	Theo. MH+ [Da]	m/z [Da] (by Search Engine): Sequest HT
	AYLPVNESFGFTADLR		1	1	1	P58252	0	1799.9	900.46
P62806	Histone H4 OS=Mus musculus OX=10090 GN=H4c16 PE=1 SV=2	1.91	10	1	1	1	103	11.4	11.36
	Sequence	Modifications	# Protein Groups	# Proteins	# PSMs	Master Protein Accessions	# Missed Cleavages	Theo. MH+ [Da]	m/z [Da] (by Search Engine): Sequest HT
	ISGLIYEETR		1	1	1	P62806	0	1180.62	590.816

## Sheet: Band 2
Table S1. Plasma protein identification by LC-MS/MS
Accession	Description	Score Sequest HT	Coverage [%]	# Peptides	# PSMs	# Unique Peptides	# AAs	MW [kDa]	calc. pI
P01898	H-2 class I histocompatibility antigen, Q10 alpha chain OS=Mus musculus OX=10090 GN=H2-Q10 PE=1 SV=3	67.51	36	10	29	10	325	37.2	5.25
	Sequence	Modifications	# Protein Groups	# Proteins	# PSMs	Master Protein Accessions	# Missed Cleavages	Theo. MH+ [Da]	m/z [Da] (by Search Engine): Sequest HT	Annotated Sequence	Positions in Master Proteins	Abundance: F5: Sample	Top Apex RT [min]
	APWMEQEGPEYWER	1xOxidation [M4]	1	2	3	P01898	0	1823.77	912.392	[R].APWMEQEGPEYWER.[E]	P01898 [73-86]	14268818	34.15
	DYIALNEDLKTWTAADVAAIITR		1	1	1	P01898	1	2563.34	855.125	[R].DYIALNEDLKTWTAADVAAIITR.[R]	P01898 [146-168]	286150	51.66
	FDSDAETPR		1	1	1	P01898	0	1037.45	519.232	[R].FDSDAETPR.[M]	P01898 [60-68]	4.16636e+06	18.67
	FIIVGYVDDTQFVR		1	3	14	P01898	0	1671.87	836.444	[R].FIIVGYVDDTQFVR.[F]	P01898 [46-59]	9.13173e+07	43.8
	GNEQSFHVSLR		1	1	4	P01898	0	1273.63	637.321	[K].GNEQSFHVSLR.[T]	P01898 [93-103]	104685883	26.05
	GYLQYAYDGR		1	1	1	P01898	0	1205.56	603.285	[R].GYLQYAYDGR.[D]	P01898 [136-145]	77217736	29.31
	GYLQYAYDGRDYIALNEDLK		1	1	1	P01898	1	2380.15	794.055	[R].GYLQYAYDGRDYIALNEDLK.[T]	P01898 [136-155]	4.2233e+06	39.77
	WEQAGAAEYYR		1	2	1	P01898	0	1343.6	672.305	[K].WEQAGAAEYYR.[A]	P01898 [171-181]	27306532	26.1
	YFETSVSRPGLGEPR		1	1	1	P01898	0	1694.85	847.932	[R].YFETSVSRPGLGEPR.[F]	P01898 [31-45]	211686112	27.67
	YLELGKETLLR		1	1	2	P01898	1	1334.77	667.889	[R].YLELGKETLLR.[T]	P01898 [195-205]	1.05584e+08	33.68
P07759	Serine protease inhibitor A3K OS=Mus musculus OX=10090 GN=Serpina3k PE=1 SV=2	39.75	19	6	16	4	418	46.9	5.16
	Sequence	Modifications	# Protein Groups	# Proteins	# PSMs	Master Protein Accessions	# Missed Cleavages	Theo. MH+ [Da]	m/z [Da] (by Search Engine): Sequest HT	Annotated Sequence	Positions in Master Proteins	Abundance: F5: Sample	Top Apex RT [min]
	AVLDVAETGTEAAAATGVIGGIR		1	1	9	P07759	0	2142.14	714.723	[K].AVLDVAETGTEAAAATGVIGGIR.[K]	P07759 [361-383]	4.29678e+06	42.93
	GKTMEEILEGLK		1	1	1	P07759	1	1347.72	674.367	[K].GKTMEEILEGLK.[F]	P07759 [92-103]	506512	38.07
	LEEDVLPEMGIK		1	1	1	P07759	0	1372.7	686.857	[R].LEEDVLPEMGIK.[E]	P07759 [323-334]	2.12753e+06	37.18
	YTGNASALLILPDQGR		1	1	1	P07759	0	1688.9	844.955	[K].YTGNASALLILPDQGR.[M]	P07759 [267-282]	584993	38.54
	MQQVEASLQPETLR		2	6	1	P07759; Q03734	0	1629.83	815.42	[RK].MQQVEASLQPETLR.[KN]	P07759 [283-296]; Q03734 [282-295]	15309646	30.49
	MQQVEASLQPETLR	1xOxidation [M1]	2	6	1	P07759; Q03734	0	1645.82	823.419	[RK].MQQVEASLQPETLR.[KN]	P07759 [283-296]; Q03734 [282-295]	3.83461e+06	28.44
	MQQVEASLQPETLRK		2	5	1	P07759; Q03734	1	1757.92	879.469	[R].MQQVEASLQPETLRK.[W]	P07759 [283-297]; Q03734 [282-296]	6.93391e+06	27.18
	MQQVEASLQPETLRK	1xOxidation [M1]	2	5	1	P07759; Q03734	1	1773.92	591.979	[R].MQQVEASLQPETLRK.[W]	P07759 [283-297]; Q03734 [282-296]	3.71085e+06	25.23
Q61838	Pregnancy zone protein OS=Mus musculus OX=10090 GN=Pzp PE=1 SV=3	30.53	10	10	11	10	1495	165.7	6.68
	Sequence	Modifications	# Protein Groups	# Proteins	# PSMs	Master Protein Accessions	# Missed Cleavages	Theo. MH+ [Da]	m/z [Da] (by Search Engine): Sequest HT	Annotated Sequence	Positions in Master Proteins	Abundance: F5: Sample	Top Apex RT [min]
	AFAQAQSHIFIEK		1	1	1	Q61838	0	1489.78	497.267	[K].AFAQAQSHIFIEK.[T]	Q61838 [1061-1073]	11741421	29.06
	AINYLISGYQR		1	1	1	Q61838	0	1297.69	649.353	[K].AINYLISGYQR.[Q]	Q61838 [1016-1026]	3.01406e+06	33.1
	GGVDDEVTLSAYITIALLEMPLPVTHSAVR		1	1	1	Q61838	0	3167.67	1056.57	[K].GGVDDEVTLSAYITIALLEMPLPVTHSAVR.[N]	Q61838 [1106-1135]	1.08799e+06	54.76
	HSLGDNDAHSIFQSVGINIFTNSK		1	1	1	Q61838	0	2601.27	867.763	[K].HSLGDNDAHSIFQSVGINIFTNSK.[I]	Q61838 [659-682]	292551	43.2
	KLQDQPNIQR		1	1	2	Q61838	1	1239.68	620.346	[K].KLQDQPNIQR.[T]	Q61838 [1417-1426]	21127078	18.36
	QQNSHGGFSSTQDTVVALQALSK		1	1	1	Q61838	0	2403.19	801.739	[K].QQNSHGGFSSTQDTVVALQALSK.[Y]	Q61838 [1259-1281]	1.50459e+06	36.19
	RSELLESLNK		1	1	1	Q61838	1	1188.66	396.892	[K].RSELLESLNK.[D]	Q61838 [1175-1184]	1.3382e+06	26.68
	RSELLESLNKDAVK		1	1	1	Q61838	2	1601.89	534.635	[K].RSELLESLNKDAVK.[E]	Q61838 [1175-1188]	1.36954e+06	28.52
	TEVNTNHVLIYIEK		1	1	1	Q61838	0	1672.89	836.953	[R].TEVNTNHVLIYIEK.[L]	Q61838 [1427-1440]	11759863	33.02
	YGAATFTR		1	2	1	Q61838	0	886.442	443.726	[K].YGAATFTR.[SA]	Q61838 [1282-1289]	2.15448e+06	21.7
P01027	Complement C3 OS=Mus musculus OX=10090 GN=C3 PE=1 SV=3	26.73	8	10	11	10	1663	186.4	6.73
	Sequence	Modifications	# Protein Groups	# Proteins	# PSMs	Master Protein Accessions	# Missed Cleavages	Theo. MH+ [Da]	m/z [Da] (by Search Engine): Sequest HT	Annotated Sequence	Positions in Master Proteins	Abundance: F5: Sample	Top Apex RT [min]
	DLELLASGVDR		1	1	1	P01027	0	1187.63	594.32	[K].DLELLASGVDR.[Y]	P01027 [1417-1427]	1.74117e+06	35.98
	EPGQDLVVLSLPITPEFIPSFR		1	1	1	P01027	0	2454.33	818.786	[R].EPGQDLVVLSLPITPEFIPSFR.[L]	P01027 [509-530]	784960	53.27
	EYVLPSFEVR		1	1	1	P01027	0	1238.64	619.827	[K].EYVLPSFEVR.[V]	P01027 [227-236]	7.20236e+06	38.14
	FFKPAMPFDLMVFVTNPDGSPASK		1	1	1	P01027	0	2643.3	881.776	[K].FFKPAMPFDLMVFVTNPDGSPASK.[V]	P01027 [364-387]	1.0206e+06	51.69
	IGQQEVEVK		1	1	1	P01027	0	1029.56	515.284	[K].IGQQEVEVK.[A]	P01027 [905-913]	1.70579e+06	19.47
	ISLAHSLTR		1	1	1	P01027	0	997.579	499.295	[K].ISLAHSLTR.[V]	P01027 [283-291]	5.59103e+06	24.46
	QVREPGQDLVVLSLPITPEFIPSFR		1	1	1	P01027	1	2837.56	946.531	[R].QVREPGQDLVVLSLPITPEFIPSFR.[L]	P01027 [506-530]
	TVVILIETPDGIPVKR		1	1	1	P01027	1	1750.05	875.533	[K].TVVILIETPDGIPVKR.[D]	P01027 [163-178]	1.55334e+06	38.6
	VVIEDGVGDAVLTR		1	1	2	P01027	0	1442.78	721.899	[R].VVIEDGVGDAVLTR.[K]	P01027 [292-305]	8.92069e+06	33.56
	YYTYLVMNK		1	1	1	P01027	0	1194.59	597.798	[R].YYTYLVMNK.[G]	P01027 [489-497]	2.6947e+06	32.23
P46412	Glutathione peroxidase 3 OS=Mus musculus OX=10090 GN=Gpx3 PE=1 SV=2	26.66	30	6	10	6	226	25.4	8.22
	Sequence	Modifications	# Protein Groups	# Proteins	# PSMs	Master Protein Accessions	# Missed Cleavages	Theo. MH+ [Da]	m/z [Da] (by Search Engine): Sequest HT	Annotated Sequence	Positions in Master Proteins	Abundance: F5: Sample	Top Apex RT [min]
	FLVGPDGIPVMR		1	2	1	P46412	0	1300.71	650.861	[K].FLVGPDGIPVMR.[W]	P46412 [186-197]	539107648	40.75
	FLVGPDGIPVMR	1xOxidation [M11]	1	2	1	P46412	0	1316.7	658.859	[K].FLVGPDGIPVMR.[W]	P46412 [186-197]	78560840	35.9
	MDILSYMR		1	1	2	P46412	0	1028.49	514.75	[K].MDILSYMR.[R]	P46412 [209-216]	259663044	39.09
	QEPGENSEILPSLK		1	1	3	P46412	0	1540.79	770.9	[K].QEPGENSEILPSLK.[Y]	P46412 [107-120]	4.75055e+06	32.17
	TTVSNVK		1	1	1	P46412	0	748.42	374.715	[R].TTVSNVK.[M]	P46412 [202-208]	138284032	10.83
	YVRPGGGFVPNFQLFEKGDVNGEK		1	1	1	P46412	1	2654.34	664.342	[K].YVRPGGGFVPNFQLFEKGDVNGEK.[E]	P46412 [121-144]	5.22282e+06	39.3
	YVRPGGGFVPNFQLFEKGDVNGEKEQK		1	1	1	P46412	2	3039.53	760.641	[K].YVRPGGGFVPNFQLFEKGDVNGEKEQK.[F]	P46412 [121-147]	19107266	37.18
P06728	Apolipoprotein A-IV OS=Mus musculus OX=10090 GN=Apoa4 PE=1 SV=3	24.09	34	8	9	8	395	45	5.47
	Sequence	Modifications	# Protein Groups	# Proteins	# PSMs	Master Protein Accessions	# Missed Cleavages	Theo. MH+ [Da]	m/z [Da] (by Search Engine): Sequest HT	Annotated Sequence	Positions in Master Proteins	Abundance: F5: Sample	Top Apex RT [min]
	ALVQQLEQFR		1	1	1	P06728	0	1231.68	616.347	[K].ALVQQLEQFR.[Q]	P06728 [317-326]	7.60848e+06	36.2
	ATIDQNLEDLR		1	1	1	P06728	0	1287.65	644.333	[K].ATIDQNLEDLR.[R]	P06728 [210-220]	501656	30.86
	LGDASTYADGVHNK		1	1	1	P06728	0	1447.68	483.233	[K].LGDASTYADGVHNK.[L]	P06728 [66-79]	9740421	19.99
	LQEHLKPYAVDLQDQINTQTQEMK		1	1	1	P06728	0	2870.44	957.488	[K].LQEHLKPYAVDLQDQINTQTQEMK.[L]	P06728 [131-154]	6006165	34.94
	LVPFVVQLSGHLAQETER		1	1	2	P06728	0	2023.1	675.04	[K].LVPFVVQLSGHLAQETER.[V]	P06728 [80-97]	5599040	43.81
	MQTTIKENVDNLHTSMMPLATNLK		1	1	1	P06728	1	2730.36	910.792	[R].MQTTIKENVDNLHTSMMPLATNLK.[D]	P06728 [164-187]	1.74399e+06	36.56
	QQLGPNSGEVESHLSFLEK		1	1	1	P06728	0	2099.04	700.354	[R].QQLGPNSGEVESHLSFLEK.[S]	P06728 [327-345]	7436443	35.97
	TDVTQQLSTLFQDKLGDASTYADGVHNK		1	1	1	P06728	1	3052.49	763.88	[K].TDVTQQLSTLFQDKLGDASTYADGVHNK.[L]	P06728 [52-79]	1.64689e+06	43.73
P07724	Albumin OS=Mus musculus OX=10090 GN=Alb PE=1 SV=3	20.1	13	6	8	6	608	68.6	6.07
	Sequence	Modifications	# Protein Groups	# Proteins	# PSMs	Master Protein Accessions	# Missed Cleavages	Theo. MH+ [Da]	m/z [Da] (by Search Engine): Sequest HT	Annotated Sequence	Positions in Master Proteins	Abundance: F5: Sample	Top Apex RT [min]
	EAHKSEIAHR		1	1	1	P07724	1	1177.61	393.208	[R].EAHKSEIAHR.[Y]	P07724 [25-34]	4809837	8.7
	ENPTTFMGHYLHEVAR		1	1	1	P07724	0	1901.9	951.458	[K].ENPTTFMGHYLHEVAR.[R]	P07724 [153-168]	8.19757e+06	35.98
	GLVLIAFSQYLQK		1	1	2	P07724	0	1479.86	740.436	[K].GLVLIAFSQYLQK.[C]	P07724 [45-57]	2.23841e+07	48.89
	LGEYGFQNAILVR		1	1	2	P07724	0	1479.8	740.405	[K].LGEYGFQNAILVR.[Y]	P07724 [422-434]	9048150	38.88
	LSQTFPNADFAEITK		1	1	1	P07724	0	1681.84	841.43	[R].LSQTFPNADFAEITK.[L]	P07724 [243-257]	3636090	37.68
	SLHTLFGDK		1	1	1	P07724	0	1017.54	509.273	[K].SLHTLFGDK.[L]	P07724 [89-97]	24731372	27.55
Q61147	Ceruloplasmin OS=Mus musculus OX=10090 GN=Cp PE=1 SV=2	14.41	3	3	5	3	1061	121.1	5.85
	Sequence	Modifications	# Protein Groups	# Proteins	# PSMs	Master Protein Accessions	# Missed Cleavages	Theo. MH+ [Da]	m/z [Da] (by Search Engine): Sequest HT	Annotated Sequence	Positions in Master Proteins	Abundance: F5: Sample	Top Apex RT [min]
	ALYFEYTDGTFSK		1	1	2	Q61147	0	1541.72	771.364	[K].ALYFEYTDGTFSK.[T]	Q61147 [70-82]	14855785	37.11
	KALYFEYTDGTFSK		1	1	2	Q61147	1	1669.81	835.414	[K].KALYFEYTDGTFSK.[T]	Q61147 [69-82]	1197487	33.3
	IYTFHAHGVTYTK		1	1	1	Q61147	0	1537.78	513.266	[R].IYTFHAHGVTYTK.[E]	Q61147 [116-128]	12215922	25.12
P22599	Alpha-1-antitrypsin 1-2 OS=Mus musculus OX=10090 GN=Serpina1b PE=1 SV=2	13.76	22	4	5	2	413	45.9	5.54
	Sequence	Modifications	# Protein Groups	# Proteins	# PSMs	Master Protein Accessions	# Missed Cleavages	Theo. MH+ [Da]	m/z [Da] (by Search Engine): Sequest HT	Annotated Sequence	Positions in Master Proteins	Abundance: F5: Sample	Top Apex RT [min]
	AVLTIDETGTEAAAATVFEAVPMSMPPILR	1xOxidation [M]	1	1	2	P22599	0	3117.58	1039.88	[K].AVLTIDETGTEAAAATVFEAVPMSMPPILR.[F]	P22599 [355-384]	495450	52.42
	ELDQDTVFALANYILFK		1	1	1	P22599	0	2000.04	1000.53	[K].ELDQDTVFALANYILFK.[G]	P22599 [193-209]	316873	54.35
	FDHPFLFIIFEEHTQSPIFVGK		2	3	2	P22599; Q00896	0	2648.35	883.462	[R].FDHPFLFIIFEEHTQSPIFVGK.[V]	P22599 [385-406]; Q00896 [385-406]	277526	51.48
	NHYQAEVFSVNFAESEEAKK		3	5	1	P22599; Q00898; Q00896	1	2327.09	582.532	[K].NHYQAEVFSVNFAESEEAKK.[V]	P22599 [154-173]; Q00898 [154-173]; Q00896 [154-173]	1.01481e+06	32.4
Q03734	Serine protease inhibitor A3M OS=Mus musculus OX=10090 GN=Serpina3m PE=1 SV=2	13.31	9	3	5	1	418	47	6.1
	Sequence	Modifications	# Protein Groups	# Proteins	# PSMs	Master Protein Accessions	# Missed Cleavages	Theo. MH+ [Da]	m/z [Da] (by Search Engine): Sequest HT	Annotated Sequence	Positions in Master Proteins	Abundance: F5: Sample	Top Apex RT [min]
	MQQVEASLQPETLR		2	6	1	P07759; Q03734	0	1629.83	815.42	[RK].MQQVEASLQPETLR.[KN]	P07759 [283-296]; Q03734 [282-295]	15309646	30.49
	MQQVEASLQPETLR	1xOxidation [M1]	2	6	1	P07759; Q03734	0	1645.82	823.419	[RK].MQQVEASLQPETLR.[KN]	P07759 [283-296]; Q03734 [282-295]	3.83461e+06	28.44
	MQQVEASLQPETLRK		2	5	1	P07759; Q03734	1	1757.92	879.469	[R].MQQVEASLQPETLRK.[W]	P07759 [283-297]; Q03734 [282-296]	6.93391e+06	27.18
	MQQVEASLQPETLRK	1xOxidation [M1]	2	5	1	P07759; Q03734	1	1773.92	591.979	[R].MQQVEASLQPETLRK.[W]	P07759 [283-297]; Q03734 [282-296]	3.71085e+06	25.23
	NIVFSPLSISAALALVSLGAK		1	1	1	Q03734	0	2071.22	691.083	[K].NIVFSPLSISAALALVSLGAK.[G]	Q03734 [70-90]	1.40429e+06	54.94
Q00623	Apolipoprotein A-I OS=Mus musculus OX=10090 GN=Apoa1 PE=1 SV=2	12.99	20	4	5	4	264	30.6	5.73
	Sequence	Modifications	# Protein Groups	# Proteins	# PSMs	Master Protein Accessions	# Missed Cleavages	Theo. MH+ [Da]	m/z [Da] (by Search Engine): Sequest HT	Annotated Sequence	Positions in Master Proteins	Abundance: F5: Sample	Top Apex RT [min]
	QEMNKDLEEVKQK		1	1	1	Q00623	2	1618.81	540.276	[R].QEMNKDLEEVKQK.[V]	Q00623 [107-119]	5.63233e+06	19.24
	QKLQELQGR		1	1	1	Q00623	1	1099.62	550.317	[R].QKLQELQGR.[L]	Q00623 [155-163]	32214408	17.78
	TQVQSVIDKASETLTAQ		1	1	1	Q00623	1	1818.94	909.978	[K].TQVQSVIDKASETLTAQ.[-]	Q00623 [248-264]	19589684	37.95
	VAPLGAELQESAR		1	1	2	Q00623	0	1340.72	447.579	[K].VAPLGAELQESAR.[Q]	Q00623 [142-154]	7.90792e+07	29.26
P10126	Elongation factor 1-alpha 1 OS=Mus musculus OX=10090 GN=Eef1a1 PE=1 SV=3	12.27	6	1	2	1	462	50.1	9.01
	Sequence	Modifications	# Protein Groups	# Proteins	# PSMs	Master Protein Accessions	# Missed Cleavages	Theo. MH+ [Da]	m/z [Da] (by Search Engine): Sequest HT	Annotated Sequence	Positions in Master Proteins	Abundance: F5: Sample	Top Apex RT [min]
	NMITGTSQADCAVLIVAAGVGEFEAGISK	1xCarbamidomethyl [C11]	1	2	1	P10126	0	2909.44	970.49	[K].NMITGTSQADCAVLIVAAGVGEFEAGISK.[N]	P10126 [101-129]	3.38837e+06	53.41
	NMITGTSQADCAVLIVAAGVGEFEAGISK	1xCarbamidomethyl [C11]; 1xOxidation [M2]	1	2	1	P10126	0	2925.43	975.823	[K].NMITGTSQADCAVLIVAAGVGEFEAGISK.[N]	P10126 [101-129]	2.64875e+06	52.93
Q00896	Alpha-1-antitrypsin 1-3 OS=Mus musculus OX=10090 GN=Serpina1c PE=1 SV=2	10.42	17	4	4	2	412	45.8	5.44
	Sequence	Modifications	# Protein Groups	# Proteins	# PSMs	Master Protein Accessions	# Missed Cleavages	Theo. MH+ [Da]	m/z [Da] (by Search Engine): Sequest HT	Annotated Sequence	Positions in Master Proteins	Abundance: F5: Sample	Top Apex RT [min]
	FDHPFLFIIFEEHTQSPIFVGK		2	3	2	P22599; Q00896	0	2648.35	883.462	[R].FDHPFLFIIFEEHTQSPIFVGK.[V]	P22599 [385-406]; Q00896 [385-406]	277526	51.48
	NHYQAEVFSVNFAESEEAKK		3	5	1	P22599; Q00898; Q00896	1	2327.09	582.532	[K].NHYQAEVFSVNFAESEEAKK.[V]	P22599 [154-173]; Q00898 [154-173]; Q00896 [154-173]	1.01481e+06	32.4
	KLDQDTVFALANYILFK		1	3	1	Q00896	1	1999.09	667.04	[K].KLDQDTVFALANYILFK.[G]	Q00896 [193-209]	226668	52.65
	LSISGEYNLK		1	2	1	Q00896	0	1123.6	562.306	[R].LSISGEYNLK.[T]	Q00896 [309-318]	6.59141e+06	29.93
Q6IFZ6	Keratin, type II cytoskeletal 1b OS=Mus musculus OX=10090 GN=Krt77 PE=1 SV=1	9.41	8	4	4	1	572	61.3	8.02
	Sequence	Modifications	# Protein Groups	# Proteins	# PSMs	Master Protein Accessions	# Missed Cleavages	Theo. MH+ [Da]	m/z [Da] (by Search Engine): Sequest HT	Annotated Sequence	Positions in Master Proteins	Abundance: F5: Sample	Top Apex RT [min]
	FLEQQNQVLQTK		2	5	1	P04104; Q6IFZ6	0	1475.79	738.402	[R].FLEQQNQVLQTK.[W]	P04104 [208-219]; Q6IFZ6 [187-198]	209697696	27.34
	NKYEDEINKR		2	4	1	P11679; Q6IFZ6	2	1308.65	436.891	[K].NKYEDEINKR.[T]	P11679 [183-192]; Q6IFZ6 [255-264]	59976472	17.73
	FASFIDKVR		5	17	1	Q3TTY5; P50446; P04104; P11679; Q6IFZ6	1	1082.6	541.805	[K].FASFIDKVR.[F]	Q3TTY5 [210-218]; P50446 [163-171]; P04104 [199-207]; P11679 [108-116]; Q6IFZ6 [178-186]	8969374	30.06
	SKDEAEALYQTK		1	1	1	Q6IFZ6	1	1382.68	691.846	[K].SKDEAEALYQTK.[Y]	Q6IFZ6 [352-363]	951121	20.86
P28665	Murinoglobulin-1 OS=Mus musculus OX=10090 GN=Mug1 PE=1 SV=3	9.28	4	3	3	3	1476	165.2	6.42
	Sequence	Modifications	# Protein Groups	# Proteins	# PSMs	Master Protein Accessions	# Missed Cleavages	Theo. MH+ [Da]	m/z [Da] (by Search Engine): Sequest HT	Annotated Sequence	Positions in Master Proteins	Abundance: F5: Sample	Top Apex RT [min]
	FALEIPVEFSMVPMAK		1	1	1	P28665	0	1808.93	904.975	[K].FALEIPVEFSMVPMAK.[M]	P28665 [516-531]
	GGVDDEMTLSAYITMALLESSLPATHPVVSK		1	1	1	P28665	0	3232.61	1078.21	[K].GGVDDEMTLSAYITMALLESSLPATHPVVSK.[A]	P28665 [1095-1125]
	HVAYAVYSLSK		1	1	1	P28665	0	1237.66	619.334	[K].HVAYAVYSLSK.[S]	P28665 [436-446]	1.03353e+06	27.2
P32261	Antithrombin-III OS=Mus musculus OX=10090 GN=Serpinc1 PE=1 SV=1	9.23	8	3	3	3	465	52	6.46
	Sequence	Modifications	# Protein Groups	# Proteins	# PSMs	Master Protein Accessions	# Missed Cleavages	Theo. MH+ [Da]	m/z [Da] (by Search Engine): Sequest HT	Annotated Sequence	Positions in Master Proteins	Abundance: F5: Sample	Top Apex RT [min]
	EVALNTIIFMGR		1	1	1	P32261	0	1363.74	682.377	[R].EVALNTIIFMGR.[V]	P32261 [447-458]	1.47601e+06	44.34
	FATNFYQHLADSK		1	1	1	P32261	0	1541.74	771.374	[R].FATNFYQHLADSK.[N]	P32261 [91-103]	1.46125e+06	31.95
	FRTEDGFSLK		1	1	1	P32261	1	1199.61	600.308	[R].FRTEDGFSLK.[E]	P32261 [356-365]	3.37623e+06	27.7
P04104	Keratin, type II cytoskeletal 1 OS=Mus musculus OX=10090 GN=Krt1 PE=1 SV=4	9.08	5	4	4	2	637	65.6	8.15
	Sequence	Modifications	# Protein Groups	# Proteins	# PSMs	Master Protein Accessions	# Missed Cleavages	Theo. MH+ [Da]	m/z [Da] (by Search Engine): Sequest HT	Annotated Sequence	Positions in Master Proteins	Abundance: F5: Sample	Top Apex RT [min]
	TNAENEFVTIK		1	1	1	P04104	0	1265.64	633.325	[R].TNAENEFVTIK.[K]	P04104 [286-296]	37802556	28.74
	TNAENEFVTIKK		1	1	1	P04104	1	1393.73	465.25	[R].TNAENEFVTIKK.[D]	P04104 [286-297]	78059424	24.67
	FLEQQNQVLQTK		2	5	1	P04104; Q6IFZ6	0	1475.79	738.402	[R].FLEQQNQVLQTK.[W]	P04104 [208-219]; Q6IFZ6 [187-198]	209697696	27.34
	FASFIDKVR		5	17	1	Q3TTY5; P50446; P04104; P11679; Q6IFZ6	1	1082.6	541.805	[K].FASFIDKVR.[F]	Q3TTY5 [210-218]; P50446 [163-171]; P04104 [199-207]; P11679 [108-116]; Q6IFZ6 [178-186]	8969374	30.06
P50446	Keratin, type II cytoskeletal 6A OS=Mus musculus OX=10090 GN=Krt6a PE=1 SV=3	8.98	7	4	4	3	553	59.3	7.94
	Sequence	Modifications	# Protein Groups	# Proteins	# PSMs	Master Protein Accessions	# Missed Cleavages	Theo. MH+ [Da]	m/z [Da] (by Search Engine): Sequest HT	Annotated Sequence	Positions in Master Proteins	Abundance: F5: Sample	Top Apex RT [min]
	AEAESWYQTK		1	4	1	P50446	0	1212.55	606.782	[R].AEAESWYQTK.[Y]	P50446 [339-348]	685354	23.88
	SLDLDSIIAEVK		1	4	1	P50446	0	1302.72	651.864	[R].SLDLDSIIAEVK.[A]	P50446 [316-327]	77711128	46.15
	YEELQVTAGR		1	3	1	P50446	0	1165.58	583.297	[K].YEELQVTAGR.[H]	P50446 [349-358]	3007607	24.71
	FASFIDKVR		5	17	1	Q3TTY5; P50446; P04104; P11679; Q6IFZ6	1	1082.6	541.805	[K].FASFIDKVR.[F]	Q3TTY5 [210-218]; P50446 [163-171]; P04104 [199-207]; P11679 [108-116]; Q6IFZ6 [178-186]	8969374	30.06
Q8VCG4	Complement component C8 gamma chain OS=Mus musculus OX=10090 GN=C8g PE=1 SV=1	8.66	17	2	3	2	202	22.5	9.25
	Sequence	Modifications	# Protein Groups	# Proteins	# PSMs	Master Protein Accessions	# Missed Cleavages	Theo. MH+ [Da]	m/z [Da] (by Search Engine): Sequest HT	Annotated Sequence	Positions in Master Proteins	Abundance: F5: Sample	Top Apex RT [min]
	AEATTLHAAPQGAAMAVSTFR		1	1	1	Q8VCG4	0	2101.05	701.024	[R].AEATTLHAAPQGAAMAVSTFR.[K]	Q8VCG4 [70-90]	7741410	32.57
	AEATTLHAAPQGAAMAVSTFR	1xOxidation [M15]	1	1	1	Q8VCG4	0	2117.04	706.355	[R].AEATTLHAAPQGAAMAVSTFR.[K]	Q8VCG4 [70-90]	1.48414e+06	29.98
	SLPVNDSVLDVFER		1	1	1	Q8VCG4	0	1589.82	795.415	[R].SLPVNDSVLDVFER.[R]	Q8VCG4 [154-167]	10611225	44.4
Q5FW60	Major urinary protein 20 OS=Mus musculus OX=10090 GN=Mup20 PE=1 SV=1	8.29	15	2	3	2	181	20.9	4.89
	Sequence	Modifications	# Protein Groups	# Proteins	# PSMs	Master Protein Accessions	# Missed Cleavages	Theo. MH+ [Da]	m/z [Da] (by Search Engine): Sequest HT	Annotated Sequence	Positions in Master Proteins	Abundance: F5: Sample	Top Apex RT [min]
	FAQLSEEHGIVR		1	1	1	Q5FW60	0	1385.72	693.369	[K].FAQLSEEHGIVR.[E]	Q5FW60 [153-164]	441175	26.44
	TDYDNYIMIHLINKK	1xOxidation [M8]	1	2	2	Q5FW60	1	1896.95	632.991	[K].TDYDNYIMIHLINKK.[D]	Q5FW60 [114-128]	1.8639e+06	33.89
Q00898	Alpha-1-antitrypsin 1-5 OS=Mus musculus OX=10090 GN=Serpina1e PE=1 SV=1	7.73	11	3	3	2	413	45.9	5.73
	Sequence	Modifications	# Protein Groups	# Proteins	# PSMs	Master Protein Accessions	# Missed Cleavages	Theo. MH+ [Da]	m/z [Da] (by Search Engine): Sequest HT	Annotated Sequence	Positions in Master Proteins	Abundance: F5: Sample	Top Apex RT [min]
	NHYQAEVFSVNFAESEEAKK		3	5	1	P22599; Q00898; Q00896	1	2327.09	582.532	[K].NHYQAEVFSVNFAESEEAKK.[V]	P22599 [154-173]; Q00898 [154-173]; Q00896 [154-173]	1.01481e+06	32.4
	LAQIHIPR		1	1	1	Q00898	0	947.579	474.294	[R].LAQIHIPR.[L]	Q00898 [301-308]	9792841	26.89
	IFNSGADLSGITEENAPLK		1	1	1	Q00898	0	1976	988.506	[R].IFNSGADLSGITEENAPLK.[L]	Q00898 [329-347]	7182451	36.92
P06151	L-lactate dehydrogenase A chain OS=Mus musculus OX=10090 GN=Ldha PE=1 SV=3	7.66	6	1	2	1	332	36.5	7.74
	Sequence	Modifications	# Protein Groups	# Proteins	# PSMs	Master Protein Accessions	# Missed Cleavages	Theo. MH+ [Da]	m/z [Da] (by Search Engine): Sequest HT	Annotated Sequence	Positions in Master Proteins	Abundance: F5: Sample	Top Apex RT [min]
	ITVVGVGAVGMACAISILMK	1xCarbamidomethyl [C13]	1	1	1	P06151	0	1990.09	664.038	[K].ITVVGVGAVGMACAISILMK.[D]	P06151 [23-42]	2.89945e+06	53.7
	ITVVGVGAVGMACAISILMK	1xCarbamidomethyl [C13]; 1xOxidation [M19]	1	1	1	P06151	0	2006.08	669.369	[K].ITVVGVGAVGMACAISILMK.[D]	P06151 [23-42]	678067	51.86
Q61171	Peroxiredoxin-2 OS=Mus musculus OX=10090 GN=Prdx2 PE=1 SV=3	6.99	22	3	3	3	198	21.8	5.41
	Sequence	Modifications	# Protein Groups	# Proteins	# PSMs	Master Protein Accessions	# Missed Cleavages	Theo. MH+ [Da]	m/z [Da] (by Search Engine): Sequest HT	Annotated Sequence	Positions in Master Proteins	Abundance: F5: Sample	Top Apex RT [min]
	EGGLGPLNIPLLADVTK		1	1	1	Q61171	0	1706.97	853.991	[K].EGGLGPLNIPLLADVTK.[S]	Q61171 [93-109]	2541566	50.97
	QITVNDLPVGR		1	1	1	Q61171	0	1211.67	606.344	[R].QITVNDLPVGR.[S]	Q61171 [140-150]	9921625	31.56
	SAPDFTATAVVDGAFK		1	1	1	Q61171	0	1596.79	798.904	[K].SAPDFTATAVVDGAFK.[E]	Q61171 [11-26]	1.21853e+06	39.34
P02535	Keratin, type I cytoskeletal 10 OS=Mus musculus OX=10090 GN=Krt10 PE=1 SV=3	6.96	5	3	3	3	570	57.7	5.11
	Sequence	Modifications	# Protein Groups	# Proteins	# PSMs	Master Protein Accessions	# Missed Cleavages	Theo. MH+ [Da]	m/z [Da] (by Search Engine): Sequest HT	Annotated Sequence	Positions in Master Proteins	Abundance: F5: Sample	Top Apex RT [min]
	ALEESNYELEGK		1	1	1	P02535	0	1381.65	691.331	[R].ALEESNYELEGK.[I]	P02535 [164-175]	132507256	24.88
	QSVEADINGLR		1	2	1	P02535	0	1201.62	601.315	[R].QSVEADINGLR.[R]	P02535 [244-254]	7387002	28.61
	SEITELR		1	1	1	P02535	0	847.452	424.231	[K].SEITELR.[R]	P02535 [361-367]	9944028	22.48
P63038	60 kDa heat shock protein, mitochondrial OS=Mus musculus OX=10090 GN=Hspd1 PE=1 SV=1	6.75	4	1	2	1	573	60.9	6.18
	Sequence	Modifications	# Protein Groups	# Proteins	# PSMs	Master Protein Accessions	# Missed Cleavages	Theo. MH+ [Da]	m/z [Da] (by Search Engine): Sequest HT	Annotated Sequence	Positions in Master Proteins	Abundance: F5: Sample	Top Apex RT [min]
	ALMLQGVDLLADAVAVTMGPK		1	1	1	P63038	0	2113.14	705.057	[R].ALMLQGVDLLADAVAVTMGPK.[G]	P63038 [38-58]
	ALMLQGVDLLADAVAVTMGPK	1xOxidation [M3]	1	1	1	P63038	0	2129.13	710.388	[R].ALMLQGVDLLADAVAVTMGPK.[G]	P63038 [38-58]
P11679	Keratin, type II cytoskeletal 8 OS=Mus musculus OX=10090 GN=Krt8 PE=1 SV=4	6.7	5	3	3	1	490	54.5	5.82
	Sequence	Modifications	# Protein Groups	# Proteins	# PSMs	Master Protein Accessions	# Missed Cleavages	Theo. MH+ [Da]	m/z [Da] (by Search Engine): Sequest HT	Annotated Sequence	Positions in Master Proteins	Abundance: F5: Sample	Top Apex RT [min]
	SLNNKFASFIDK		1	1	1	P11679	1	1383.73	692.357	[K].SLNNKFASFIDK.[V]	P11679 [103-114]	66564896	37.6
	NKYEDEINKR		2	4	1	P11679; Q6IFZ6	2	1308.65	436.891	[K].NKYEDEINKR.[T]	P11679 [183-192]; Q6IFZ6 [255-264]	59976472	17.73
	FASFIDKVR		5	17	1	Q3TTY5; P50446; P04104; P11679; Q6IFZ6	1	1082.6	541.805	[K].FASFIDKVR.[F]	Q3TTY5 [210-218]; P50446 [163-171]; P04104 [199-207]; P11679 [108-116]; Q6IFZ6 [178-186]	8969374	30.06
P63242	Eukaryotic translation initiation factor 5A-1 OS=Mus musculus OX=10090 GN=Eif5a PE=1 SV=2	6.63	31	2	2	2	154	16.8	5.24
	Sequence	Modifications	# Protein Groups	# Proteins	# PSMs	Master Protein Accessions	# Missed Cleavages	Theo. MH+ [Da]	m/z [Da] (by Search Engine): Sequest HT	Annotated Sequence	Positions in Master Proteins	Abundance: F5: Sample	Top Apex RT [min]
	RNDFQLIGIQDGYLSLLQDSGEVR		1	1	1	P63242	1	2736.4	912.811	[K].RNDFQLIGIQDGYLSLLQDSGEVR.[E]	P63242 [86-109]	185907	48.98
	YDCGEEILITVLSAMTEEAAVAIK	1xCarbamidomethyl [C3]	1	1	1	P63242	0	2626.3	876.113	[K].YDCGEEILITVLSAMTEEAAVAIK.[A]	P63242 [127-150]
Q9Z2K1	Keratin, type I cytoskeletal 16 OS=Mus musculus OX=10090 GN=Krt16 PE=1 SV=3	6.28	7	2	3	2	469	51.6	5.2
	Sequence	Modifications	# Protein Groups	# Proteins	# PSMs	Master Protein Accessions	# Missed Cleavages	Theo. MH+ [Da]	m/z [Da] (by Search Engine): Sequest HT	Annotated Sequence	Positions in Master Proteins	Abundance: F5: Sample	Top Apex RT [min]
	ASLENSLEETKGR		1	1	2	Q9Z2K1	1	1433.72	717.369	[K].ASLENSLEETKGR.[Y]	Q9Z2K1 [351-363]	2.43909e+06	23.04
	GQTGGDVNVEMDAAPGVDLSR	1xOxidation [M11]	1	1	1	Q9Z2K1	0	2103.96	1052.49	[R].GQTGGDVNVEMDAAPGVDLSR.[I]	Q9Z2K1 [260-280]	4501728	29.43
P84228	Histone H3.2 OS=Mus musculus OX=10090 GN=H3c15 PE=1 SV=2	6.23	24	1	1	1	136	15.4	11.27
	Sequence	Modifications	# Protein Groups	# Proteins	# PSMs	Master Protein Accessions	# Missed Cleavages	Theo. MH+ [Da]	m/z [Da] (by Search Engine): Sequest HT	Annotated Sequence	Positions in Master Proteins	Abundance: F5: Sample	Top Apex RT [min]
	FQSSAVMALQEASEAYLVGLFEDTNLCAIHAK	1xCarbamidomethyl [C27]	1	1	1	P84228	0	3513.7	1171.91	[R].FQSSAVMALQEASEAYLVGLFEDTNLCAIHAK.[R]	P84228 [85-116]	1.94561e+06	53.95
P07743	BPI fold-containing family A member 2 OS=Mus musculus OX=10090 GN=Bpifa2 PE=1 SV=1	6.07	7	1	2	1	235	24.7	5.01
	Sequence	Modifications	# Protein Groups	# Proteins	# PSMs	Master Protein Accessions	# Missed Cleavages	Theo. MH+ [Da]	m/z [Da] (by Search Engine): Sequest HT	Annotated Sequence	Positions in Master Proteins	Abundance: F5: Sample	Top Apex RT [min]
	NSILETLNTADLGNLK		1	1	2	P07743	0	1715.92	858.468	[K].NSILETLNTADLGNLK.[S]	P07743 [64-79]	2358237	42.98
P41317	Mannose-binding protein C OS=Mus musculus OX=10090 GN=Mbl2 PE=1 SV=2	5.7	11	2	2	2	244	25.9	5.06
	Sequence	Modifications	# Protein Groups	# Proteins	# PSMs	Master Protein Accessions	# Missed Cleavages	Theo. MH+ [Da]	m/z [Da] (by Search Engine): Sequest HT	Annotated Sequence	Positions in Master Proteins	Abundance: F5: Sample	Top Apex RT [min]
	AEFDTSEIDSEIAALR		1	1	1	P41317	0	1766.84	883.931	[R].AEFDTSEIDSEIAALR.[S]	P41317 [97-112]	1.31841e+06	43.36
	DIAYLGITDVR		1	1	1	P41317	0	1235.66	618.341	[K].DIAYLGITDVR.[V]	P41317 [176-186]	2.15794e+06	38.05
P47955	60S acidic ribosomal protein P1 OS=Mus musculus OX=10090 GN=Rplp1 PE=1 SV=1	5.67	24	1	1	1	114	11.5	4.32
	Sequence	Modifications	# Protein Groups	# Proteins	# PSMs	Master Protein Accessions	# Missed Cleavages	Theo. MH+ [Da]	m/z [Da] (by Search Engine): Sequest HT	Annotated Sequence	Positions in Master Proteins	Abundance: F5: Sample	Top Apex RT [min]
	MASVSELACIYSALILHDDEVTVTEDK	1xCarbamidomethyl [C9]; 1xMet-loss+Acetyl [N-Term]	1	1	1	P47955	0	2920.41	974.15	[-].MASVSELACIYSALILHDDEVTVTEDK.[I]	P47955 [1-27]
P68433	Histone H3.1 OS=Mus musculus OX=10090 GN=H3c11 PE=1 SV=2	5.18	24	1	1	1	136	15.4	11.12
	Sequence	Modifications	# Protein Groups	# Proteins	# PSMs	Master Protein Accessions	# Missed Cleavages	Theo. MH+ [Da]	m/z [Da] (by Search Engine): Sequest HT	Annotated Sequence	Positions in Master Proteins	Abundance: F5: Sample	Top Apex RT [min]
	FQSSAVMALQEACEAYLVGLFEDTNLCAIHAK	2xCarbamidomethyl [C13; C27]	1	1	1	P68433	0	3586.7	1196.25	[R].FQSSAVMALQEACEAYLVGLFEDTNLCAIHAK.[R]	P68433 [85-116]	1.35772e+06	53.17
P29391	Ferritin light chain 1 OS=Mus musculus OX=10090 GN=Ftl1 PE=1 SV=2	4.99	20	2	2	2	183	20.8	6
	Sequence	Modifications	# Protein Groups	# Proteins	# PSMs	Master Protein Accessions	# Missed Cleavages	Theo. MH+ [Da]	m/z [Da] (by Search Engine): Sequest HT	Annotated Sequence	Positions in Master Proteins	Abundance: F5: Sample	Top Apex RT [min]
	QNYSTEVEAAVNR		1	2	1	P29391	0	1480.7	740.86	[R].QNYSTEVEAAVNR.[L]	P29391 [7-19]	2.76647e+06	28.1
	VAGPQPAQTGAPQGSLGEYLFER		1	1	1	P29391	0	2373.18	791.736	[R].VAGPQPAQTGAPQGSLGEYLFER.[L]	P29391 [155-177]	3.68493e+06	39.56
P17182	Alpha-enolase OS=Mus musculus OX=10090 GN=Eno1 PE=1 SV=3	4.82	5	1	1	1	434	47.1	6.8
	Sequence	Modifications	# Protein Groups	# Proteins	# PSMs	Master Protein Accessions	# Missed Cleavages	Theo. MH+ [Da]	m/z [Da] (by Search Engine): Sequest HT	Annotated Sequence	Positions in Master Proteins	Abundance: F5: Sample	Top Apex RT [min]
	SGETEDTFIADLVVGLCTGQIK	1xCarbamidomethyl [C17]	1	3	1	P17182	0	2353.16	785.063	[R].SGETEDTFIADLVVGLCTGQIK.[T]	P17182 [373-394]	2074315	52.7
Q61781	Keratin, type I cytoskeletal 14 OS=Mus musculus OX=10090 GN=Krt14 PE=1 SV=2	4.8	4	2	2	2	484	52.8	5.17
	Sequence	Modifications	# Protein Groups	# Proteins	# PSMs	Master Protein Accessions	# Missed Cleavages	Theo. MH+ [Da]	m/z [Da] (by Search Engine): Sequest HT	Annotated Sequence	Positions in Master Proteins	Abundance: F5: Sample	Top Apex RT [min]
	EVATNSELVQSGK		1	2	1	Q61781	0	1361.69	681.352	[R].EVATNSELVQSGK.[S]	Q61781 [322-334]	7.27888e+06	20.67
	TEELNREVATNSELVQSGK		1	2	1	Q61781	1	2104.05	702.023	[K].TEELNREVATNSELVQSGK.[S]	Q61781 [316-334]	680292	26.38
P52430	Serum paraoxonase/arylesterase 1 OS=Mus musculus OX=10090 GN=Pon1 PE=1 SV=2	4.67	7	2	2	2	355	39.5	5.22
	Sequence	Modifications	# Protein Groups	# Proteins	# PSMs	Master Protein Accessions	# Missed Cleavages	Theo. MH+ [Da]	m/z [Da] (by Search Engine): Sequest HT	Annotated Sequence	Positions in Master Proteins	Abundance: F5: Sample	Top Apex RT [min]
	IFFYDAENPPGSEVLR		1	1	1	P52430	0	1853.91	927.461	[R].IFFYDAENPPGSEVLR.[I]	P52430 [291-306]	7158830	40.95
	IQNILSEDPK		1	1	1	P52430	0	1156.62	578.818	[R].IQNILSEDPK.[I]	P52430 [307-316]	5671394	27.25
P63260	Actin, cytoplasmic 2 OS=Mus musculus OX=10090 GN=Actg1 PE=1 SV=1	4.66	8	2	2	2	375	41.8	5.48
	Sequence	Modifications	# Protein Groups	# Proteins	# PSMs	Master Protein Accessions	# Missed Cleavages	Theo. MH+ [Da]	m/z [Da] (by Search Engine): Sequest HT	Annotated Sequence	Positions in Master Proteins	Abundance: F5: Sample	Top Apex RT [min]
	IWHHTFYNELR		1	4	1	P63260	0	1515.75	505.923	[K].IWHHTFYNELR.[V]	P63260 [85-95]	1.94467e+06	29.55
	MEEEIAALVIDNGSGMCK	1xCarbamidomethyl [C17]; 1xMet-loss+Acetyl [N-Term]	1	1	1	P63260	0	1877.86	939.437	[-].MEEEIAALVIDNGSGMCK.[A]	P63260 [1-18]	97734.1	49.03
Q9DBB9	Carboxypeptidase N subunit 2 OS=Mus musculus OX=10090 GN=Cpn2 PE=1 SV=2	4.39	5	2	2	2	547	60.4	5.88
	Sequence	Modifications	# Protein Groups	# Proteins	# PSMs	Master Protein Accessions	# Missed Cleavages	Theo. MH+ [Da]	m/z [Da] (by Search Engine): Sequest HT	Annotated Sequence	Positions in Master Proteins	Abundance: F5: Sample	Top Apex RT [min]
	ALGLDEGEPAGSWDLTVEGR		1	1	1	Q9DBB9	0	2071.99	1036.5	[R].ALGLDEGEPAGSWDLTVEGR.[A]	Q9DBB9 [456-475]	1.67297e+06	40.16
	WLNIQLSSR		1	1	1	Q9DBB9	0	1116.62	558.814	[R].WLNIQLSSR.[D]	Q9DBB9 [501-509]	6.39351e+06	36.05
Q8BK48	Pyrethroid hydrolase Ces2e OS=Mus musculus OX=10090 GN=Ces2e PE=1 SV=1	4.33	5	2	2	2	559	62.3	6.16
	Sequence	Modifications	# Protein Groups	# Proteins	# PSMs	Master Protein Accessions	# Missed Cleavages	Theo. MH+ [Da]	m/z [Da] (by Search Engine): Sequest HT	Annotated Sequence	Positions in Master Proteins	Abundance: F5: Sample	Top Apex RT [min]
	GNWGYLDQVAALR		1	2	1	Q8BK48	0	1462.74	731.878	[KR].GNWGYLDQVAALR.[W]	Q8BK48 [194-206]	2.24946e+06	41.17
	WVQQNIVHFGGNPDR		1	1	1	Q8BK48	0	1766.87	883.945	[R].WVQQNIVHFGGNPDR.[V]	Q8BK48 [207-221]	1.33575e+06	31.6
Q3TTY5	Keratin, type II cytoskeletal 2 epidermal OS=Mus musculus OX=10090 GN=Krt2 PE=1 SV=1	4.26	3	2	2	1	707	70.9	8.06
	Sequence	Modifications	# Protein Groups	# Proteins	# PSMs	Master Protein Accessions	# Missed Cleavages	Theo. MH+ [Da]	m/z [Da] (by Search Engine): Sequest HT	Annotated Sequence	Positions in Master Proteins	Abundance: F5: Sample	Top Apex RT [min]
	LLRDYQELMNTK		1	1	1	Q3TTY5	1	1523.79	508.603	[R].LLRDYQELMNTK.[L]	Q3TTY5 [480-491]	4.9877e+06	31.36
	FASFIDKVR		5	17	1	Q3TTY5; P50446; P04104; P11679; Q6IFZ6	1	1082.6	541.805	[K].FASFIDKVR.[F]	Q3TTY5 [210-218]; P50446 [163-171]; P04104 [199-207]; P11679 [108-116]; Q6IFZ6 [178-186]	8969374	30.06
P80313	T-complex protein 1 subunit eta OS=Mus musculus OX=10090 GN=Cct7 PE=1 SV=1	4.25	5	1	1	1	544	59.6	7.84
	Sequence	Modifications	# Protein Groups	# Proteins	# PSMs	Master Protein Accessions	# Missed Cleavages	Theo. MH+ [Da]	m/z [Da] (by Search Engine): Sequest HT	Annotated Sequence	Positions in Master Proteins	Abundance: F5: Sample	Top Apex RT [min]
	INALTAASEAACLIVSVDETIKNPR	1xCarbamidomethyl [C12]	1	1	1	P80313	1	2656.4	886.143	[R].INALTAASEAACLIVSVDETIKNPR.[S]	P80313 [500-524]	406387	52.84
P84244	Histone H3.3 OS=Mus musculus OX=10090 GN=H3-3b PE=1 SV=2	4.25	24	1	1	1	136	15.3	11.27
	Sequence	Modifications	# Protein Groups	# Proteins	# PSMs	Master Protein Accessions	# Missed Cleavages	Theo. MH+ [Da]	m/z [Da] (by Search Engine): Sequest HT	Annotated Sequence	Positions in Master Proteins	Abundance: F5: Sample	Top Apex RT [min]
	FQSAAIGALQEASEAYLVGLFEDTNLCAIHAK	1xCarbamidomethyl [C27]	1	2	1	P84244	0	3437.7	1146.58	[R].FQSAAIGALQEASEAYLVGLFEDTNLCAIHAK.[R]	P84244 [85-116]
Q06890	Clusterin OS=Mus musculus OX=10090 GN=Clu PE=1 SV=1	4.14	5	2	2	2	448	51.6	5.67
	Sequence	Modifications	# Protein Groups	# Proteins	# PSMs	Master Protein Accessions	# Missed Cleavages	Theo. MH+ [Da]	m/z [Da] (by Search Engine): Sequest HT	Annotated Sequence	Positions in Master Proteins	Abundance: F5: Sample	Top Apex RT [min]
	IDSLLESDR		1	1	1	Q06890	0	1047.53	524.27	[R].IDSLLESDR.[Q]	Q06890 [158-166]	643030	26.25
	YINKEIQNAVQGVK		1	1	1	Q06890	1	1603.88	802.448	[R].YINKEIQNAVQGVK.[H]	Q06890 [40-53]	391008	29
O08677	Kininogen-1 OS=Mus musculus OX=10090 GN=Kng1 PE=1 SV=1	4.12	3	2	2	2	661	73.1	6.54
	Sequence	Modifications	# Protein Groups	# Proteins	# PSMs	Master Protein Accessions	# Missed Cleavages	Theo. MH+ [Da]	m/z [Da] (by Search Engine): Sequest HT	Annotated Sequence	Positions in Master Proteins	Abundance: F5: Sample	Top Apex RT [min]
	ATSQVVAGTK		1	1	1	O08677	0	961.531	481.27	[K].ATSQVVAGTK.[Y]	O08677 [306-315]	6.35167e+06	13.45
	RPPGFSPFR		1	1	1	O08677	0	1060.57	530.79	[R].RPPGFSPFR.[S]	O08677 [380-388]	10559597	27.58
P14211	Calreticulin OS=Mus musculus OX=10090 GN=Calr PE=1 SV=1	3.31	7	1	1	1	416	48	4.49
	Sequence	Modifications	# Protein Groups	# Proteins	# PSMs	Master Protein Accessions	# Missed Cleavages	Theo. MH+ [Da]	m/z [Da] (by Search Engine): Sequest HT	Annotated Sequence	Positions in Master Proteins	Abundance: F5: Sample	Top Apex RT [min]
	SGTIFDNFLITNDEAYAEEFGNETWGVTK		1	1	1	P14211	0	3268.5	1090.18	[K].SGTIFDNFLITNDEAYAEEFGNETWGVTK.[A]	P14211 [323-351]	118855	52.24
Q9CYH2	Peroxiredoxin-like 2A OS=Mus musculus OX=10090 GN=Prxl2a PE=1 SV=2	2.95	6	1	1	1	218	24.4	9.17
	Sequence	Modifications	# Protein Groups	# Proteins	# PSMs	Master Protein Accessions	# Missed Cleavages	Theo. MH+ [Da]	m/z [Da] (by Search Engine): Sequest HT	Annotated Sequence	Positions in Master Proteins	Abundance: F5: Sample	Top Apex RT [min]
	KAALEYLEDIDLK		1	1	1	Q9CYH2	1	1520.82	507.613	[R].KAALEYLEDIDLK.[T]	Q9CYH2 [32-44]	2.08528e+06	39.09
E9Q557	Desmoplakin OS=Mus musculus OX=10090 GN=Dsp PE=1 SV=1	2.82	0	1	1	1	2883	332.7	6.8
	Sequence	Modifications	# Protein Groups	# Proteins	# PSMs	Master Protein Accessions	# Missed Cleavages	Theo. MH+ [Da]	m/z [Da] (by Search Engine): Sequest HT	Annotated Sequence	Positions in Master Proteins	Abundance: F5: Sample	Top Apex RT [min]
	LNDSILQATEQR		1	1	1	E9Q557	0	1387.72	694.365	[R].LNDSILQATEQR.[R]	E9Q557 [1268-1279]	488066	29.95
P50543	Protein S100-A11 OS=Mus musculus OX=10090 GN=S100a11 PE=1 SV=1	2.67	16	1	1	1	98	11.1	5.45
	Sequence	Modifications	# Protein Groups	# Proteins	# PSMs	Master Protein Accessions	# Missed Cleavages	Theo. MH+ [Da]	m/z [Da] (by Search Engine): Sequest HT	Annotated Sequence	Positions in Master Proteins	Abundance: F5: Sample	Top Apex RT [min]
	TEFLSFMNTELAAFTK		1	1	1	P50543	0	1849.9	925.462	[K].TEFLSFMNTELAAFTK.[N]	P50543 [32-47]	159951	51.96
Q8BWY3	Eukaryotic peptide chain release factor subunit 1 OS=Mus musculus OX=10090 GN=Etf1 PE=1 SV=4	2.58	6	1	1	1	437	49	5.71
	Sequence	Modifications	# Protein Groups	# Proteins	# PSMs	Master Protein Accessions	# Missed Cleavages	Theo. MH+ [Da]	m/z [Da] (by Search Engine): Sequest HT	Annotated Sequence	Positions in Master Proteins	Abundance: F5: Sample	Top Apex RT [min]
	LVDISYGGENGFNQAIELSTEVLSNVK		1	1	1	Q8BWY3	0	2896.46	966.163	[K].LVDISYGGENGFNQAIELSTEVLSNVK.[F]	Q8BWY3 [253-279]
P23953	Carboxylesterase 1C OS=Mus musculus OX=10090 GN=Ces1c PE=1 SV=4	2.58	3	1	1	1	554	61	5.06
	Sequence	Modifications	# Protein Groups	# Proteins	# PSMs	Master Protein Accessions	# Missed Cleavages	Theo. MH+ [Da]	m/z [Da] (by Search Engine): Sequest HT	Annotated Sequence	Positions in Master Proteins	Abundance: F5: Sample	Top Apex RT [min]
	ILSDMFSTEKEILPLK		1	1	1	P23953	1	1864.01	932.516	[K].ILSDMFSTEKEILPLK.[I]	P23953 [96-111]	862582	42.54
P33622	Apolipoprotein C-III OS=Mus musculus OX=10090 GN=Apoc3 PE=1 SV=2	2.52	19	1	1	1	99	11	4.75
	Sequence	Modifications	# Protein Groups	# Proteins	# PSMs	Master Protein Accessions	# Missed Cleavages	Theo. MH+ [Da]	m/z [Da] (by Search Engine): Sequest HT	Annotated Sequence	Positions in Master Proteins	Abundance: F5: Sample	Top Apex RT [min]
	TVQDALSSVQESDIAVVAR		1	1	1	P33622	0	1988.03	663.352	[K].TVQDALSSVQESDIAVVAR.[G]	P33622 [42-60]	524191	38.17
Q6IFX2	Keratin, type I cytoskeletal 42 OS=Mus musculus OX=10090 GN=Krt42 PE=1 SV=1	2.48	3	1	1	1	452	50.1	5.16
	Sequence	Modifications	# Protein Groups	# Proteins	# PSMs	Master Protein Accessions	# Missed Cleavages	Theo. MH+ [Da]	m/z [Da] (by Search Engine): Sequest HT	Annotated Sequence	Positions in Master Proteins	Abundance: F5: Sample	Top Apex RT [min]
	ALEEANADLEVK		1	1	1	Q6IFX2	0	1301.66	651.339	[R].ALEEANADLEVK.[I]	Q6IFX2 [114-125]	8523953	26.38
P03977	Ig kappa chain V-III region 50S10.1 OS=Mus musculus OX=10090 PE=1 SV=1	2.47	14	1	1	1	111	12	5.06
	Sequence	Modifications	# Protein Groups	# Proteins	# PSMs	Master Protein Accessions	# Missed Cleavages	Theo. MH+ [Da]	m/z [Da] (by Search Engine): Sequest HT	Annotated Sequence	Positions in Master Proteins	Abundance: F5: Sample	Top Apex RT [min]
	LLIYAASNQGSGVPAR		1	4	1	P03977	0	1616.88	808.95	[K].LLIYAASNQGSGVPAR.[F]	P03977 [50-65]	666955	31.07
Q8VEK3	Heterogeneous nuclear ribonucleoprotein U OS=Mus musculus OX=10090 GN=Hnrnpu PE=1 SV=1	2.37	3	1	1	1	800	87.9	6.24
	Sequence	Modifications	# Protein Groups	# Proteins	# PSMs	Master Protein Accessions	# Missed Cleavages	Theo. MH+ [Da]	m/z [Da] (by Search Engine): Sequest HT	Annotated Sequence	Positions in Master Proteins	Abundance: F5: Sample	Top Apex RT [min]
	GNFTLPEVAECFDEITYVELQK	1xCarbamidomethyl [C11]	1	1	1	Q8VEK3	0	2602.24	868.087	[K].GNFTLPEVAECFDEITYVELQK.[E]	Q8VEK3 [614-635]
Q9R1P3	Proteasome subunit beta type-2 OS=Mus musculus OX=10090 GN=Psmb2 PE=1 SV=1	2.34	5	1	1	1	201	22.9	7.02
	Sequence	Modifications	# Protein Groups	# Proteins	# PSMs	Master Protein Accessions	# Missed Cleavages	Theo. MH+ [Da]	m/z [Da] (by Search Engine): Sequest HT	Annotated Sequence	Positions in Master Proteins	Abundance: F5: Sample	Top Apex RT [min]
	VAASNIVQMK		1	1	1	Q9R1P3	0	1060.58	530.796	[R].VAASNIVQMK.[D]	Q9R1P3 [20-29]	876833	25.46
P16301	Phosphatidylcholine-sterol acyltransferase OS=Mus musculus OX=10090 GN=Lcat PE=1 SV=2	2.31	3	1	1	1	438	49.7	6.43
	Sequence	Modifications	# Protein Groups	# Proteins	# PSMs	Master Protein Accessions	# Missed Cleavages	Theo. MH+ [Da]	m/z [Da] (by Search Engine): Sequest HT	Annotated Sequence	Positions in Master Proteins	Abundance: F5: Sample	Top Apex RT [min]
	TLEHINAILLGAYR		1	1	1	P16301	0	1583.89	792.453	[K].TLEHINAILLGAYR.[T]	P16301 [410-423]	1.25602e+06	39.51
Q9ESB3	Histidine-rich glycoprotein OS=Mus musculus OX=10090 GN=Hrg PE=1 SV=2	2.31	3	1	1	1	525	59.1	7.66
	Sequence	Modifications	# Protein Groups	# Proteins	# PSMs	Master Protein Accessions	# Missed Cleavages	Theo. MH+ [Da]	m/z [Da] (by Search Engine): Sequest HT	Annotated Sequence	Positions in Master Proteins	Abundance: F5: Sample	Top Apex RT [min]
	DSPVLLDFFEDSELYR		1	1	1	Q9ESB3	0	1944.92	972.968	[K].DSPVLLDFFEDSELYR.[K]	Q9ESB3 [138-153]
O55234	Proteasome subunit beta type-5 OS=Mus musculus OX=10090 GN=Psmb5 PE=1 SV=3	2.22	5	1	1	1	264	28.5	7.02
	Sequence	Modifications	# Protein Groups	# Proteins	# PSMs	Master Protein Accessions	# Missed Cleavages	Theo. MH+ [Da]	m/z [Da] (by Search Engine): Sequest HT	Annotated Sequence	Positions in Master Proteins	Abundance: F5: Sample	Top Apex RT [min]
	ATAGAYIASQTVK		1	1	1	O55234	0	1280.68	640.849	[R].ATAGAYIASQTVK.[K]	O55234 [79-91]	1.94804e+06	24.71
P28063	Proteasome subunit beta type-8 OS=Mus musculus OX=10090 GN=Psmb8 PE=1 SV=2	2.18	4	1	1	1	276	30.2	6.68
	Sequence	Modifications	# Protein Groups	# Proteins	# PSMs	Master Protein Accessions	# Missed Cleavages	Theo. MH+ [Da]	m/z [Da] (by Search Engine): Sequest HT	Annotated Sequence	Positions in Master Proteins	Abundance: F5: Sample	Top Apex RT [min]
	LLSNMMLQYR		1	1	1	P28063	0	1268.65	634.828	[K].LLSNMMLQYR.[G]	P28063 [154-163]	2.89598e+06	36.4
P98086	Complement C1q subcomponent subunit A OS=Mus musculus OX=10090 GN=C1qa PE=1 SV=2	2.13	6	1	1	1	245	26	9.11
	Sequence	Modifications	# Protein Groups	# Proteins	# PSMs	Master Protein Accessions	# Missed Cleavages	Theo. MH+ [Da]	m/z [Da] (by Search Engine): Sequest HT	Annotated Sequence	Positions in Master Proteins	Abundance: F5: Sample	Top Apex RT [min]
	QNPMTLGNVVIFDK	1xOxidation [M4]	1	1	1	P98086	0	1591.81	796.414	[R].QNPMTLGNVVIFDK.[V]	P98086 [122-135]	566945	36.61
Q60692	Proteasome subunit beta type-6 OS=Mus musculus OX=10090 GN=Psmb6 PE=1 SV=3	2.12	5	1	1	1	238	25.4	5.11
	Sequence	Modifications	# Protein Groups	# Proteins	# PSMs	Master Protein Accessions	# Missed Cleavages	Theo. MH+ [Da]	m/z [Da] (by Search Engine): Sequest HT	Annotated Sequence	Positions in Master Proteins	Abundance: F5: Sample	Top Apex RT [min]
	LAAIQESGVER		1	1	1	Q60692	0	1172.63	586.82	[R].LAAIQESGVER.[Q]	Q60692 [209-219]	3306318	23.36
P01845	Ig lambda-3 chain C region OS=Mus musculus OX=10090 GN=Iglc3 PE=1 SV=1	2.1	16	1	1	1	104	11.4	5.33
	Sequence	Modifications	# Protein Groups	# Proteins	# PSMs	Master Protein Accessions	# Missed Cleavages	Theo. MH+ [Da]	m/z [Da] (by Search Engine): Sequest HT	Annotated Sequence	Positions in Master Proteins	Abundance: F5: Sample	Top Apex RT [min]
	ANGTPITQGVDTSNPTK		1	2	1	P01845	0	1700.84	850.933	[K].ANGTPITQGVDTSNPTK.[E]	P01845 [43-59]	1.27588e+06	23.31
P01869	Ig gamma-1 chain C region, membrane-bound form OS=Mus musculus OX=10090 GN=Ighg1 PE=1 SV=2	2.08	3	1	1	1	393	43.4	6.44
	Sequence	Modifications	# Protein Groups	# Proteins	# PSMs	Master Protein Accessions	# Missed Cleavages	Theo. MH+ [Da]	m/z [Da] (by Search Engine): Sequest HT	Annotated Sequence	Positions in Master Proteins	Abundance: F5: Sample	Top Apex RT [min]
	VNSAAFPAPIEK		1	2	1	P01869	0	1243.67	622.34	[R].VNSAAFPAPIEK.[T]	P01869 [200-211]	1.08797e+06	29.16
P63323	40S ribosomal protein S12 OS=Mus musculus OX=10090 GN=Rps12 PE=1 SV=3	2.07	17	1	1	1	132	14.5	7.21
	Sequence	Modifications	# Protein Groups	# Proteins	# PSMs	Master Protein Accessions	# Missed Cleavages	Theo. MH+ [Da]	m/z [Da] (by Search Engine): Sequest HT	Annotated Sequence	Positions in Master Proteins	Abundance: F5: Sample	Top Apex RT [min]
	MAEEGIAAGGVMDVNTALQEVLK	1xMet-loss+Acetyl [N-Term]	1	1	1	P63323	0	2257.14	1129.07	[-].MAEEGIAAGGVMDVNTALQEVLK.[T]	P63323 [1-23]	917096	53.07
P06683	Complement component C9 OS=Mus musculus OX=10090 GN=C9 PE=1 SV=2	2.05	2	1	1	1	548	62	5.78
	Sequence	Modifications	# Protein Groups	# Proteins	# PSMs	Master Protein Accessions	# Missed Cleavages	Theo. MH+ [Da]	m/z [Da] (by Search Engine): Sequest HT	Annotated Sequence	Positions in Master Proteins	Abundance: F5: Sample	Top Apex RT [min]
	SILAFGQFNGK		1	1	1	P06683	0	1181.63	591.32	[R].SILAFGQFNGK.[S]	P06683 [64-74]	518048	36.98
Q8CIZ8	von Willebrand factor OS=Mus musculus OX=10090 GN=Vwf PE=1 SV=2	2.04	0	1	1	1	2813	309.1	5.5
	Sequence	Modifications	# Protein Groups	# Proteins	# PSMs	Master Protein Accessions	# Missed Cleavages	Theo. MH+ [Da]	m/z [Da] (by Search Engine): Sequest HT	Annotated Sequence	Positions in Master Proteins	Abundance: F5: Sample	Top Apex RT [min]
	LSSETFGFAAR		1	1	1	Q8CIZ8	0	1185.59	593.301	[K].LSSETFGFAAR.[I]	Q8CIZ8 [129-139]	1182976	31.88
Q61268	Apolipoprotein C-IV OS=Mus musculus OX=10090 GN=Apoc4 PE=1 SV=1	1.96	7	1	1	1	124	14.3	9.52
	Sequence	Modifications	# Protein Groups	# Proteins	# PSMs	Master Protein Accessions	# Missed Cleavages	Theo. MH+ [Da]	m/z [Da] (by Search Engine): Sequest HT	Annotated Sequence	Positions in Master Proteins	Abundance: F5: Sample	Top Apex RT [min]
	TQAWLQSSR		1	1	1	Q61268	0	1076.55	538.78	[R].TQAWLQSSR.[D]	Q61268 [94-102]	1.0035e+06	23.78
P10639	Thioredoxin OS=Mus musculus OX=10090 GN=Txn PE=1 SV=3	1.95	9	1	1	1	105	11.7	4.92
	Sequence	Modifications	# Protein Groups	# Proteins	# PSMs	Master Protein Accessions	# Missed Cleavages	Theo. MH+ [Da]	m/z [Da] (by Search Engine): Sequest HT	Annotated Sequence	Positions in Master Proteins	Abundance: F5: Sample	Top Apex RT [min]
	VGEFSGANK		1	1	1	P10639	0	908.447	454.728	[K].VGEFSGANK.[E]	P10639 [86-94]	476431	16.64
Q9WTS2	Alpha-(1,6)-fucosyltransferase OS=Mus musculus OX=10090 GN=Fut8 PE=1 SV=2	1.93	2	1	1	1	575	66.5	7.52
	Sequence	Modifications	# Protein Groups	# Proteins	# PSMs	Master Protein Accessions	# Missed Cleavages	Theo. MH+ [Da]	m/z [Da] (by Search Engine): Sequest HT	Annotated Sequence	Positions in Master Proteins	Abundance: F5: Sample	Top Apex RT [min]
	YLIRPQPWLEK		1	1	1	Q9WTS2	0	1442.82	721.904	[K].YLIRPQPWLEK.[E]	Q9WTS2 [334-344]	1.20051e+06	32.89
Q8C3P7	N6-adenosine-methyltransferase subunit METTL3 OS=Mus musculus OX=10090 GN=Mettl3 PE=1 SV=2	1.93	1	1	1	1	580	64.6	6.49
	Sequence	Modifications	# Protein Groups	# Proteins	# PSMs	Master Protein Accessions	# Missed Cleavages	Theo. MH+ [Da]	m/z [Da] (by Search Engine): Sequest HT	Annotated Sequence	Positions in Master Proteins	Abundance: F5: Sample	Top Apex RT [min]
	QLDSLRER		1	1	1	Q8C3P7	1	1016.55	508.774	[K].QLDSLRER.[L]	Q8C3P7 [14-21]	7.87235e+06	25.29
Q9DBD0	Inhibitor of carbonic anhydrase OS=Mus musculus OX=10090 GN=Ica PE=1 SV=1	1.9	2	1	1	1	700	76.7	7.25
	Sequence	Modifications	# Protein Groups	# Proteins	# PSMs	Master Protein Accessions	# Missed Cleavages	Theo. MH+ [Da]	m/z [Da] (by Search Engine): Sequest HT	Annotated Sequence	Positions in Master Proteins	Abundance: F5: Sample	Top Apex RT [min]
	ILFNQQELFGR		1	1	1	Q9DBD0	0	1364.73	682.873	[R].ILFNQQELFGR.[N]	Q9DBD0 [622-632]	1.92439e+06	39.66
