# Supplementary material for: Adipose tissue-derived PRXL2A suppresses hepatic lipogenesis
Source: Research Square preprint supplement (doi:10.21203/rs.3.rs-5055933/v1), 2024-09-17
Supplement: Supplementary file 2 [file eef81e59f546352f9a5e0a34.xlsx]

## Sheet: Proteins
Table S2. Identification of the PRXL2A receptor by LC-MS/MS
Accession	Description	Score Sequest HT	Coverage [%]	# Peptides	# PSMs	# Unique Peptides	# AAs	MW [kDa]	calc. pI
Q8R0Y6	Cytosolic 10-formyltetrahydrofolate dehydrogenase OS=Mus musculus OX=10090 GN=Aldh1l1 PE=1 SV=1	1135.6	88	97	684	97	902	98.6	5.91
	Sequence	Modifications	# Protein Groups	# Proteins	# PSMs	Master Protein Accessions	# Missed Cleavages	Theo. MH+ [Da]	m/z [Da] (by Search Engine): Sequest HT			Percolator PEP (by Search Engine): Sequest HT	XCorr (by Search Engine): Sequest HT	Annotated Sequence	Positions in Master Proteins	Abundance: F5: Sample	Top Apex RT [min]
	ADPLGLEAEK		1	1	2	Q8R0Y6	0	1042.54	521.773			0.001189	2.38	[K].ADPLGLEAEK.[D]	Q8R0Y6 [39-48]	41645224	24.91
	ADPLGLEAEKDGVPVFK		1	1	7	Q8R0Y6	1	1784.94	892.973			6.173e-12	4.2	[K].ADPLGLEAEKDGVPVFK.[F]	Q8R0Y6 [39-55]	352214696	34.96
	ADPLGLEAEKDGVPVFKFPR		1	1	6	Q8R0Y6	2	2185.17	547.045			9.533e-14	4.45	[K].ADPLGLEAEKDGVPVFKFPR.[W]	Q8R0Y6 [39-58]	20905341	38.37
	AGLILFGNDDR		1	1	32	Q8R0Y6	0	1190.62	595.812			0.0003325	2.21	[K].AGLILFGNDDR.[M]	Q8R0Y6 [275-285]	9.34982e+08	35.29
	AGLILFGNDDRMLLVK	1xOxidation [M12]	1	1	3	Q8R0Y6	1	1790.98	895.997			0.0006891	2.26	[K].AGLILFGNDDRMLLVK.[N]	Q8R0Y6 [275-290]	2.24726e+06	38.77
	AGIPKGVVNILPGSGSLVGQR		1	1	1	Q8R0Y6	1	2019.17	673.727			0.0001777	1.99	[K].AGIPKGVVNILPGSGSLVGQR.[L]	Q8R0Y6 [616-636]	909676	36.83
	ALYVSDK		1	1	1	Q8R0Y6	0	795.425	398.215			0.04517	1.88	[K].ALYVSDK.[L]	Q8R0Y6 [846-852]	49223232	16.53
	ALYVSDKLQAGTVFVNTYNK		1	1	3	Q8R0Y6	1	2231.17	1116.09			7.081e-15	6.08	[K].ALYVSDKLQAGTVFVNTYNK.[T]	Q8R0Y6 [846-865]	2.58117e+07	34.86
	ANATEFGLASGVFTR		1	1	30	Q8R0Y6	0	1540.78	770.89			3.136e-09	3.85	[R].ANATEFGLASGVFTR.[D]	Q8R0Y6 [827-841]	7.24055e+08	36.58
	ANATEFGLASGVFTRDINK		1	1	2	Q8R0Y6	1	2011.02	1006.02			3.619e-09	2.5	[R].ANATEFGLASGVFTRDINK.[A]	Q8R0Y6 [827-845]	1.5429e+06	35.65
	ARGQALPEVVAK		1	1	4	Q8R0Y6	1	1238.72	619.863			2.671e-06	2.99	[R].ARGQALPEVVAK.[Y]	Q8R0Y6 [61-72]	117512992	20.46
	AVQMGMSSVFFNK		1	1	1	Q8R0Y6	0	1445.69	723.352			4.317e-06	3.15	[K].AVQMGMSSVFFNK.[G]	Q8R0Y6 [691-703]	16485478	36.3
	AVQMGMSSVFFNK	1xOxidation [M]	1	1	4	Q8R0Y6	0	1461.69	731.344			5.874e-06	3.24	[K].AVQMGMSSVFFNK.[G]	Q8R0Y6 [691-703]	33770294	30.59
	AVQMGMSSVFFNK	2xOxidation [M4; M6]	1	1	2	Q8R0Y6	0	1477.68	739.345			2.6e-06	2.85	[K].AVQMGMSSVFFNK.[G]	Q8R0Y6 [691-703]	2.25036e+07	25.89
	AVQMGMSSVFFNKGENCIAAGR	1xCarbamidomethyl [C17]	1	1	1	Q8R0Y6	1	2374.11	792.041			1.751e-12	4.52	[K].AVQMGMSSVFFNKGENCIAAGR.[L]	Q8R0Y6 [691-712]	2315881	35.04
	AVQMGMSSVFFNKGENCIAAGR	1xCarbamidomethyl [C17]; 1xOxidation [M]	1	1	2	Q8R0Y6	1	2390.1	797.371			1.773e-13	5.63	[K].AVQMGMSSVFFNKGENCIAAGR.[L]	Q8R0Y6 [691-712]	6333497	30.88
	AVQMGMSSVFFNKGENCIAAGR	1xCarbamidomethyl [C17]; 2xOxidation [M4; M6]	1	1	1	Q8R0Y6	1	2406.1	802.702			2.608e-12	5.16	[K].AVQMGMSSVFFNKGENCIAAGR.[L]	Q8R0Y6 [691-712]	9626632	27.76
	DGKADPLGLEAEKDGVPVFK		1	1	2	Q8R0Y6	2	2085.09	522.026			7.905e-08	3.28	[K].DGKADPLGLEAEKDGVPVFK.[F]	Q8R0Y6 [36-55]	859177	33.56
	DGVPVFK		1	1	2	Q8R0Y6	0	761.419	381.213			0.07755	1.48	[K].DGVPVFK.[F]	Q8R0Y6 [49-55]	4.29696e+07	24.82
	DGVPVFKFPR		1	1	5	Q8R0Y6	1	1161.64	387.885			1.133e-05	2.03	[K].DGVPVFKFPR.[W]	Q8R0Y6 [49-58]	1.24121e+07	33.27
	DLGEAALNEYLR		1	1	15	Q8R0Y6	0	1363.69	682.345			1.142e-07	3.11	[K].DLGEAALNEYLR.[I]	Q8R0Y6 [883-894]	5.73486e+08	37.35
	DTNHGPQNHEAHLR		1	1	6	Q8R0Y6	0	1625.75	542.588			9.955e-12	3.94	[R].DTNHGPQNHEAHLR.[K]	Q8R0Y6 [743-756]	3.27888e+07	9.7
	ECDVLPDDTVSTLYNR	1xCarbamidomethyl [C2]	1	1	3	Q8R0Y6	0	1896.86	948.935			3.68e-09	3.39	[K].ECDVLPDDTVSTLYNR.[F]	Q8R0Y6 [151-166]	52839709	33.71
	EESFGPIMIISR		1	1	12	Q8R0Y6	0	1378.7	689.857			6.764e-06	2.52	[K].EESFGPIMIISR.[F]	Q8R0Y6 [803-814]	1.89526e+08	39.97
	EESFGPIMIISR	1xOxidation [M8]	1	1	15	Q8R0Y6	0	1394.7	697.852			5.279e-06	2.53	[K].EESFGPIMIISR.[F]	Q8R0Y6 [803-814]	2.96458e+08	36.75
	EGATLVCGGNQVPRPGFFFQPTVFTDVEDHMYIAK	1xCarbamidomethyl [C7]; 1xOxidation [M31]	1	1	3	Q8R0Y6	0	3943.88	986.726			1.161e-08	2.51	[K].EGATLVCGGNQVPRPGFFFQPTVFTDVEDHMYIAK.[E]	Q8R0Y6 [768-802]	2660314	44.18
	EGHEVVGVFTIPDK		1	1	1	Q8R0Y6	0	1526.78	509.6			0.002097	3.03	[K].EGHEVVGVFTIPDK.[D]	Q8R0Y6 [22-35]	4.04418e+06	32.08
	EGHEVVGVFTIPDKDGK		1	1	9	Q8R0Y6	1	1826.93	913.971			4.579e-11	4.82	[K].EGHEVVGVFTIPDKDGK.[A]	Q8R0Y6 [22-38]	1.97634e+08	28.74
	EGHEVVGVFTIPDKDGKADPLGLEAEK		1	1	6	Q8R0Y6	2	2850.45	713.369			1.128e-14	5.31	[K].EGHEVVGVFTIPDKDGKADPLGLEAEK.[D]	Q8R0Y6 [22-48]	1.13712e+07	35.07
	ETAMINWDQPAEAIHNWIR	1xOxidation [M4]	1	1	2	Q8R0Y6	0	2311.09	771.034			2.919e-09	3.95	[K].ETAMINWDQPAEAIHNWIR.[G]	Q8R0Y6 [207-225]	833523	42.35
	FADGDVDAVLSR		1	1	48	Q8R0Y6	0	1264.62	632.81			7.356e-07	2.29	[R].FADGDVDAVLSR.[A]	Q8R0Y6 [815-826]	1.28237e+09	30.5
	FAELTLK		1	1	18	Q8R0Y6	0	821.477	411.242			0.004144	1.2	[K].FAELTLK.[A]	Q8R0Y6 [609-615]	7.17613e+08	27.69
	FAELTLKAGIPK		1	1	1	Q8R0Y6	1	1287.77	429.927			2.141e-05	1.7	[K].FAELTLKAGIPK.[G]	Q8R0Y6 [609-620]
	FLFPEGIK		1	2	24	Q8R0Y6	0	950.535	475.771			0.006221	1.83	[R].FLFPEGIK.[GA]	Q8R0Y6 [167-174]	8.53339e+08	35.4
	GASAINWTLIHGDK		1	1	2	Q8R0Y6	0	1482.77	494.929			1.709e-06	3.51	[R].GASAINWTLIHGDK.[K]	Q8R0Y6 [115-128]	15738687	30.67
	GASAINWTLIHGDKK		1	1	3	Q8R0Y6	1	1610.86	805.936			4.399e-10	4.26	[R].GASAINWTLIHGDKK.[G]	Q8R0Y6 [115-129]	74785324	27.07
	GEDGESECVINYVEK	1xCarbamidomethyl [C8]	1	1	3	Q8R0Y6	0	1727.74	864.375			8.442e-10	4.22	[R].GEDGESECVINYVEK.[A]	Q8R0Y6 [397-411]	1.08141e+07	29.18
	GENCIAAGR	1xCarbamidomethyl [C4]	1	2	1	Q8R0Y6	0	947.436	474.22			0.01444	2.45	[K].GENCIAAGR.[L]	Q8R0Y6 [704-712]	9287690	12.14
	GGFTIFWADDGLDTGDLLLQK		1	1	1	Q8R0Y6	0	2282.13	761.374			0.001694	1.56	[K].GGFTIFWADDGLDTGDLLLQK.[E]	Q8R0Y6 [130-150]	685048	51.04
	GMVQAVRLIAEGTAPR		1	1	1	Q8R0Y6	1	1668.92	556.977			0.004315	1.65	[K].GMVQAVRLIAEGTAPR.[R]	Q8R0Y6 [175-190]	276687	34.79
	GMVQAVRLIAEGTAPR	1xOxidation [M2]	1	1	1	Q8R0Y6	1	1684.92	562.31			0.0009541	1.3	[K].GMVQAVRLIAEGTAPR.[R]	Q8R0Y6 [175-190]	689676	28.28
	GNDKVPGAWTEACGQK	1xCarbamidomethyl [C13]	1	1	4	Q8R0Y6	1	1717.8	573.27			1.461e-06	3.3	[R].GNDKVPGAWTEACGQK.[L]	Q8R0Y6 [226-241]	6.21786e+06	21.63
	GQALPEVVAK		1	1	10	Q8R0Y6	0	1011.58	506.294			0.0007942	2.24	[R].GQALPEVVAK.[Y]	Q8R0Y6 [63-72]	6.68467e+08	23.59
	GSASSALELTEEELATAEAVR		1	1	13	Q8R0Y6	0	2134.05	1067.53			5.407e-13	4.12	[K].GSASSALELTEEELATAEAVR.[S]	Q8R0Y6 [308-328]	2.74829e+08	43
	GVVNILPGSGSLVGQR		1	1	15	Q8R0Y6	0	1552.88	776.943			4.806e-08	3.46	[K].GVVNILPGSGSLVGQR.[L]	Q8R0Y6 [621-636]	1.08464e+09	35.98
	GVVNILPGSGSLVGQRLSDHPDVR		1	1	2	Q8R0Y6	1	2472.33	618.837			3.443e-07	2.81	[K].GVVNILPGSGSLVGQRLSDHPDVR.[K]	Q8R0Y6 [621-644]	437391	34.67
	HGSIIYHPSLLPR		1	2	38	Q8R0Y6	0	1489.83	745.418			1.728e-10	4.08	[RK].HGSIIYHPSLLPR.[H]	Q8R0Y6 [100-112]	7.54334e+08	27.37
	HRGASAINWTLIHGDK		1	1	1	Q8R0Y6	1	1775.93	444.738			5.597e-05	1.72	[R].HRGASAINWTLIHGDK.[K]	Q8R0Y6 [113-128]	1.366e+06	25.44
	HRGASAINWTLIHGDKK		1	1	2	Q8R0Y6	2	1904.02	476.761			5.191e-08	4.1	[R].HRGASAINWTLIHGDKK.[G]	Q8R0Y6 [113-129]	730806	22.84
	KEGHEVVGVFTIPDK		1	1	1	Q8R0Y6	1	1654.88	552.296			7.185e-06	2.29	[R].KEGHEVVGVFTIPDK.[D]	Q8R0Y6 [21-35]	769552	28.71
	KEGHEVVGVFTIPDKDGK		1	1	5	Q8R0Y6	2	1955.02	652.346			9.162e-16	5.86	[R].KEGHEVVGVFTIPDKDGK.[A]	Q8R0Y6 [21-38]	3.48757e+07	25.93
	KIGFTGSTEVGK		1	1	5	Q8R0Y6	1	1223.66	612.335			6.834e-08	3.33	[R].KIGFTGSTEVGK.[H]	Q8R0Y6 [645-656]	204592576	19.91
	KIGFTGSTEVGKHIMK		1	1	1	Q8R0Y6	2	1732.94	433.989			0.01853	1.21	[R].KIGFTGSTEVGKHIMK.[S]	Q8R0Y6 [645-660]	513448	22.44
	KIGFTGSTEVGKHIMK	1xOxidation [M15]	1	1	2	Q8R0Y6	2	1748.94	583.65			2.845e-05	2.69	[R].KIGFTGSTEVGKHIMK.[S]	Q8R0Y6 [645-660]	1.72161e+06	19.77
	KLRGEDGESECVINYVEK	1xCarbamidomethyl [C11]	1	1	7	Q8R0Y6	2	2125.02	709.012			1.433e-14	6.19	[R].KLRGEDGESECVINYVEK.[A]	Q8R0Y6 [394-411]	4.32142e+07	25.57
	KLTLQMPYQLFIGGEFVDAEGAK		1	1	1	Q8R0Y6	1	2555.32	852.443			0.003081	1.38	[K].KLTLQMPYQLFIGGEFVDAEGAK.[T]	Q8R0Y6 [415-437]	1.27615e+06	47.46
	KLTLQMPYQLFIGGEFVDAEGAK	1xOxidation [M6]	1	1	5	Q8R0Y6	1	2571.32	857.777			4.522e-11	6.65	[K].KLTLQMPYQLFIGGEFVDAEGAK.[T]	Q8R0Y6 [415-437]	1.34261e+07	43.23
	KLVEYCQR	1xCarbamidomethyl [C6]	1	1	3	Q8R0Y6	1	1095.56	548.285			0.002119	2.72	[R].KLVEYCQR.[G]	Q8R0Y6 [757-764]	93136420	15.15
	KVSLELGGK		1	2	5	Q8R0Y6	1	930.562	465.784			0.0009035	2.37	[K].KVSLELGGK.[S]	Q8R0Y6 [669-677]	8.77264e+07	19.67
	LADLMEQHQEELATIEALDAGAVYTLALK		1	1	8	Q8R0Y6	0	3156.61	1052.87			1.171e-14	6.76	[R].LADLMEQHQEELATIEALDAGAVYTLALK.[T]	Q8R0Y6 [492-520]	8.50366e+06	50.52
	LADLMEQHQEELATIEALDAGAVYTLALK	1xOxidation [M5]	1	1	6	Q8R0Y6	0	3172.61	1058.21			6.491e-17	6.47	[R].LADLMEQHQEELATIEALDAGAVYTLALK.[T]	Q8R0Y6 [492-520]	5.32607e+06	48.93
	IAVIGQSLFGQEVYCQLR	1xCarbamidomethyl [C15]	1	1	1	Q8R0Y6	0	2081.08	1041.05			4.001e-08	2.95	[K].IAVIGQSLFGQEVYCQLR.[K]	Q8R0Y6 [3-20]	2.2255e+06	43.17
	IAVIGQSLFGQEVYCQLRK	1xCarbamidomethyl [C15]	1	1	2	Q8R0Y6	1	2209.18	737.064			2.94e-10	4.19	[K].IAVIGQSLFGQEVYCQLRK.[E]	Q8R0Y6 [3-21]	2.64317e+06	39.81
	LFVEDSIHDQFVQK		1	1	13	Q8R0Y6	0	1704.86	852.936			1.737e-10	5.27	[R].LFVEDSIHDQFVQK.[V]	Q8R0Y6 [713-726]	4.85319e+08	31.53
	IGFTGSTEVGK		1	1	19	Q8R0Y6	0	1095.57	548.287			4.026e-05	2.19	[K].IGFTGSTEVGK.[H]	Q8R0Y6 [646-656]	6.33782e+08	23.12
	IGFTGSTEVGKHIMK		1	1	2	Q8R0Y6	1	1604.85	401.967			4.574e-05	2.25	[K].IGFTGSTEVGKHIMK.[S]	Q8R0Y6 [646-660]	1.91008e+06	24.64
	IGFTGSTEVGKHIMK	1xOxidation [M14]	1	1	3	Q8R0Y6	1	1620.84	540.951			1.193e-08	3.61	[K].IGFTGSTEVGKHIMK.[S]	Q8R0Y6 [646-660]	4.41349e+06	21.78
	IGNPLDR		1	1	1	Q8R0Y6	0	784.431	392.718			0.08403	1.14	[K].IGNPLDR.[D]	Q8R0Y6 [736-742]	114212432	20.61
	IGNPLDRDTNHGPQNHEAHLR		1	1	12	Q8R0Y6	1	2391.17	797.725			5.229e-16	5.02	[K].IGNPLDRDTNHGPQNHEAHLR.[K]	Q8R0Y6 [736-756]	1.9661e+08	18.59
	IGNPLDRDTNHGPQNHEAHLRK		1	1	1	Q8R0Y6	2	2519.26	504.657			1.485e-05	2.64	[K].IGNPLDRDTNHGPQNHEAHLRK.[L]	Q8R0Y6 [736-757]	1.50437e+06	17.05
	LIAEGTAPR		1	1	26	Q8R0Y6	0	927.526	464.267			0.0009385	1.52	[R].LIAEGTAPR.[R]	Q8R0Y6 [182-190]	1.08556e+09	17.24
	LIAEGTAPRRPQPEEGATYEGIQKK		1	1	1	Q8R0Y6	2	2739.44	685.616			0.02179	1.35	[R].LIAEGTAPRRPQPEEGATYEGIQKK.[E]	Q8R0Y6 [182-206]	249478	21.41
	ILPNVPEVEDSTDFFK		1	1	18	Q8R0Y6	0	1849.92	925.466			5.954e-08	2.92	[R].ILPNVPEVEDSTDFFK.[S]	Q8R0Y6 [334-349]	4.25312e+08	41.51
	LQAGTVFVNTYNK		1	1	5	Q8R0Y6	0	1454.76	727.885			7.814e-06	2.99	[K].LQAGTVFVNTYNK.[T]	Q8R0Y6 [853-865]	1.65368e+08	28.64
	LQAGTVFVNTYNKTDVAAPFGGFK		1	1	1	Q8R0Y6	1	2545.31	849.105			1.804e-07	2.65	[K].LQAGTVFVNTYNKTDVAAPFGGFK.[Q]	Q8R0Y6 [853-876]	3.88713e+06	38.76
	IQGATIPINQARPNR		1	1	3	Q8R0Y6	0	1648.92	824.965			0.0003694	2.18	[K].IQGATIPINQARPNR.[N]	Q8R0Y6 [540-554]	3.01091e+08	22.89
	LRGEDGESECVINYVEK	1xCarbamidomethyl [C10]	1	1	3	Q8R0Y6	1	1996.93	998.967			4.367e-12	4.17	[K].LRGEDGESECVINYVEK.[A]	Q8R0Y6 [395-411]	2.34412e+07	27.75
	LSDHPDVR		1	1	13	Q8R0Y6	0	938.469	469.737			0.002887	1.97	[R].LSDHPDVR.[K]	Q8R0Y6 [637-644]	3.14632e+08	12.74
	LSDHPDVRK		1	1	2	Q8R0Y6	1	1066.56	356.192			0.001488	1.77	[R].LSDHPDVRK.[I]	Q8R0Y6 [637-645]	91980062	10.38
	LTFFNSTLNTSGLVAQGEALPIPGAHRPGLVTK		1	1	6	Q8R0Y6	0	3406.85	1136.29			4.418e-12	3.74	[K].LTFFNSTLNTSGLVAQGEALPIPGAHRPGLVTK.[A]	Q8R0Y6 [242-274]	1.57726e+07	43.22
	LTLQMPYQLFIGGEFVDAEGAK		1	1	2	Q8R0Y6	0	2427.23	809.747			9.01e-11	4.85	[K].LTLQMPYQLFIGGEFVDAEGAK.[T]	Q8R0Y6 [416-437]	1.16889e+06	51.04
	LTLQMPYQLFIGGEFVDAEGAK	1xOxidation [M5]	1	1	2	Q8R0Y6	0	2443.22	815.078			2.646e-11	5.04	[K].LTLQMPYQLFIGGEFVDAEGAK.[T]	Q8R0Y6 [416-437]	3.3858e+06	46.99
	LVEYCQR	1xCarbamidomethyl [C5]	1	1	1	Q8R0Y6	0	967.467	484.235			0.06609	1.73	[K].LVEYCQR.[G]	Q8R0Y6 [758-764]	37612364	16.37
	MKIAVIGQSLFGQEVYCQLR	1xCarbamidomethyl [C17]; 1xMet-loss [N-Term]	1	1	1	Q8R0Y6	1	2209.18	737.065			7.689e-06	2.43	[-].MKIAVIGQSLFGQEVYCQLR.[K]	Q8R0Y6 [1-20]	421892	39.32
	MLLVKNIQLEDGK	1xOxidation [M1]	1	1	2	Q8R0Y6	1	1516.84	758.922			0.001352	1.67	[R].MLLVKNIQLEDGK.[M]	Q8R0Y6 [286-298]
	MMPASQFFK		1	1	3	Q8R0Y6	0	1086.51	543.759			0.002593	1.59	[K].MMPASQFFK.[G]	Q8R0Y6 [299-307]	8.2087e+07	32.51
	MMPASQFFK	1xOxidation [M]	1	1	12	Q8R0Y6	0	1102.51	551.756			0.001294	1.64	[K].MMPASQFFK.[G]	Q8R0Y6 [299-307]	2.75553e+08	29.77
	MMPASQFFK	2xOxidation [M1; M2]	1	1	13	Q8R0Y6	0	1118.5	559.753			0.004522	1.62	[K].MMPASQFFK.[G]	Q8R0Y6 [299-307]	1.33125e+08	25.02
	NIQLEDGK		1	1	5	Q8R0Y6	0	916.473	458.739			0.009929	1.13	[K].NIQLEDGK.[M]	Q8R0Y6 [291-298]	3.27392e+08	17.26
	NIQLEDGKMMPASQFFK	1xOxidation [M]	1	1	3	Q8R0Y6	1	1999.96	667.317			6.281e-06	2.61	[K].NIQLEDGKMMPASQFFK.[G]	Q8R0Y6 [291-307]	3.14147e+06	33.44
	NIQLEDGKMMPASQFFK	2xOxidation [M9; M10]	1	1	3	Q8R0Y6	1	2015.96	1008.49			9.053e-10	3.1	[K].NIQLEDGKMMPASQFFK.[G]	Q8R0Y6 [291-307]	21373080	30.17
	QSGFGKDLGEAALNEYLR		1	1	2	Q8R0Y6	1	1967.98	984.492			3.062e-09	3.01	[K].QSGFGKDLGEAALNEYLR.[I]	Q8R0Y6 [877-894]	3.45023e+06	36.52
	RPQPEEGATYEGIQK		1	1	4	Q8R0Y6	0	1702.84	851.923			7.377e-10	3.74	[R].RPQPEEGATYEGIQK.[K]	Q8R0Y6 [191-205]	302102771	18.38
	RPQPEEGATYEGIQKK		1	1	11	Q8R0Y6	1	1830.93	915.969			3.547e-10	4.09	[R].RPQPEEGATYEGIQKK.[E]	Q8R0Y6 [191-206]	4.5254e+08	16.35
	SCALSNVK	1xCarbamidomethyl [C2]	1	1	2	Q8R0Y6	0	878.44	439.723			0.01076	2.02	[K].SCALSNVK.[K]	Q8R0Y6 [661-668]	3.11132e+07	14.55
	SCALSNVKK	1xCarbamidomethyl [C2]	1	1	1	Q8R0Y6	1	1006.53	336.182			0.006228	1.75	[K].SCALSNVKK.[V]	Q8R0Y6 [661-669]	12064357	11.69
	SGAASVDVVR		1	1	1	Q8R0Y6	0	960.511	480.762			0.04332	1.71	[K].SGAASVDVVR.[L]	Q8R0Y6 [350-359]	501192	18.19
	SPLIIFADCDLNK	1xCarbamidomethyl [C9]	1	1	3	Q8R0Y6	0	1505.77	753.388			1.664e-06	2.49	[K].SPLIIFADCDLNK.[A]	Q8R0Y6 [678-690]	6.4783e+07	39.15
	TAACLAAGNTVVIKPAQVTPLTALK	1xCarbamidomethyl [C4]	1	1	4	Q8R0Y6	0	2508.42	836.81			3.677e-13	4.76	[K].TAACLAAGNTVVIKPAQVTPLTALK.[F]	Q8R0Y6 [584-608]	19256616	37.3
	TDVAAPFGGFK		1	1	19	Q8R0Y6	0	1109.56	555.285			3.704e-06	3.02	[K].TDVAAPFGGFK.[Q]	Q8R0Y6 [866-876]	7.05886e+08	31.41
	TDVAAPFGGFKQSGFGK		1	1	4	Q8R0Y6	1	1713.86	571.956			1.425e-07	2.61	[K].TDVAAPFGGFKQSGFGK.[D]	Q8R0Y6 [866-882]	990484	31.64
	THVGMSIQTFR		1	1	6	Q8R0Y6	0	1276.65	638.828			0.0002295	2.44	[K].THVGMSIQTFR.[Y]	Q8R0Y6 [521-531]	1.57934e+08	25.32
	THVGMSIQTFR	1xOxidation [M5]	1	1	6	Q8R0Y6	0	1292.64	431.551			0.0003035	2.46	[K].THVGMSIQTFR.[Y]	Q8R0Y6 [521-531]	1.17126e+08	20.08
	TYSTINPTDGSVICQVSLAQVSDVDK	1xCarbamidomethyl [C14]	1	1	4	Q8R0Y6	0	2797.36	1399.19			8.1e-12	3.25	[K].TYSTINPTDGSVICQVSLAQVSDVDK.[A]	Q8R0Y6 [438-463]	2.63984e+07	39.76
	TYSTINPTDGSVICQVSLAQVSDVDKAVAAAK	1xCarbamidomethyl [C14]	1	1	2	Q8R0Y6	1	3308.67	1103.56			1.296e-18	7.07	[K].TYSTINPTDGSVICQVSLAQVSDVDKAVAAAK.[E]	Q8R0Y6 [438-469]	2.01964e+07	42.26
	VPGAWTEACGQK	1xCarbamidomethyl [C9]	1	1	1	Q8R0Y6	0	1303.61	652.306			6.736e-06	2.03	[K].VPGAWTEACGQK.[L]	Q8R0Y6 [230-241]	867226	21.92
	VSLELGGK		1	2	4	Q8R0Y6	0	802.467	401.736			0.008133	1.36	[K].VSLELGGK.[S]	Q8R0Y6 [670-677]	2.53614e+08	23.2
	VVEEVGK		1	1	4	Q8R0Y6	0	759.425	380.215			0.03015	1.61	[K].VVEEVGK.[M]	Q8R0Y6 [727-733]	1.14569e+08	11.51
	VVEEVGKMK		1	1	1	Q8R0Y6	1	1018.56	509.787			0.04764	1.48	[K].VVEEVGKMK.[I]	Q8R0Y6 [727-735]	789966	21.44
	VVEEVGKMK	1xOxidation [M8]	1	1	1	Q8R0Y6	1	1034.56	517.78			0.002032	1.92	[K].VVEEVGKMK.[I]	Q8R0Y6 [727-735]	876720	15.81
	YFAGWCDK	1xCarbamidomethyl [C6]	1	2	1	Q8R0Y6	0	1046.44	523.723			0.01713	1.72	[R].YFAGWCDK.[I]	Q8R0Y6 [532-539]	13862614	26.42
	YFAGWCDKIQGATIPINQARPNR	1xCarbamidomethyl [C6]	1	1	2	Q8R0Y6	1	2676.35	669.841			2.014e-07	3.79	[R].YFAGWCDKIQGATIPINQARPNR.[N]	Q8R0Y6 [532-554]	2.79032e+06	33.7
	YQALGAELNVLPFCSQFIPMEVINAPR	1xCarbamidomethyl [C14]	1	1	1	Q8R0Y6	0	3077.56	1026.52			1.737e-12	4.48	[K].YQALGAELNVLPFCSQFIPMEVINAPR.[H]	Q8R0Y6 [73-99]	472012	51.89
	YQALGAELNVLPFCSQFIPMEVINAPR	1xCarbamidomethyl [C14]; 1xOxidation [M20]	1	1	1	Q8R0Y6	0	3093.55	1031.85			3.698e-10	2.56	[K].YQALGAELNVLPFCSQFIPMEVINAPR.[H]	Q8R0Y6 [73-99]	691811	50.66
Q8VDD5	Myosin-9 OS=Mus musculus OX=10090 GN=Myh9 PE=1 SV=4	926.14	68	174	392	150	1960	226.2	5.66
	Sequence	Modifications	# Protein Groups	# Proteins	# PSMs	Master Protein Accessions	# Missed Cleavages	Theo. MH+ [Da]	m/z [Da] (by Search Engine): Sequest HT			Percolator PEP (by Search Engine): Sequest HT	XCorr (by Search Engine): Sequest HT	Annotated Sequence	Positions in Master Proteins	Abundance: F5: Sample	Top Apex RT [min]
	AKLQEMESAVK		1	1	3	Q8VDD5	1	1233.65	617.33			2.571e-05	2.45	[K].AKLQEMESAVK.[S]	Q8VDD5 [1792-1802]	6.45156e+06	20.13
	AKLQEMESAVK	1xOxidation [M6]	1	1	2	Q8VDD5	1	1249.65	625.326			1.203e-06	2.75	[K].AKLQEMESAVK.[S]	Q8VDD5 [1792-1802]	3.6466e+06	13.15
	AKQTLENERGELANEVK		1	1	4	Q8VDD5	2	1929	965.006			1.714e-12	3.97	[K].AKQTLENERGELANEVK.[A]	Q8VDD5 [1218-1234]	1.05163e+07	20.48
	ALEEAMEQK		1	1	1	Q8VDD5	0	1048.5	524.751			0.006857	2.22	[R].ALEEAMEQK.[A]	Q8VDD5 [1484-1492]	9977567	17.82
	ALEEAMEQK	1xOxidation [M6]	1	1	1	Q8VDD5	0	1064.49	532.749			0.00161	1.53	[R].ALEEAMEQK.[A]	Q8VDD5 [1484-1492]	6049338	11.54
	ALEEAMEQKAELER		1	1	2	Q8VDD5	1	1646.81	823.907			1.494e-09	3.96	[R].ALEEAMEQKAELER.[L]	Q8VDD5 [1484-1497]	3.65094e+06	24.89
	ALEEAMEQKAELER	1xOxidation [M6]	1	1	2	Q8VDD5	1	1662.8	831.903			1.066e-07	3.51	[R].ALEEAMEQKAELER.[L]	Q8VDD5 [1484-1497]	9744200	19.26
	ALELDSNLYR		1	1	2	Q8VDD5	0	1193.62	597.31			0.0004343	2.08	[K].ALELDSNLYR.[I]	Q8VDD5 [746-755]	44612064	30.18
	ALEQQVEEMK		1	1	1	Q8VDD5	0	1204.59	602.795			0.00142	2.64	[R].ALEQQVEEMK.[T]	Q8VDD5 [1529-1538]	6.36456e+06	23.2
	ALEQQVEEMK	1xOxidation [M9]	1	1	1	Q8VDD5	0	1220.58	610.793			0.0008479	2.6	[R].ALEQQVEEMK.[T]	Q8VDD5 [1529-1538]	3.71435e+06	17.38
	ALEQQVEEMKTQLEELEDELQATEDAK		1	1	3	Q8VDD5	1	3147.49	1049.83			3.224e-08	3.27	[R].ALEQQVEEMKTQLEELEDELQATEDAK.[L]	Q8VDD5 [1529-1555]	470398	50.8
	ALEQQVEEMKTQLEELEDELQATEDAK	1xOxidation [M9]	1	1	1	Q8VDD5	1	3163.48	1055.16			1.937e-08	3.87	[R].ALEQQVEEMKTQLEELEDELQATEDAK.[L]	Q8VDD5 [1529-1555]	467984	42.94
	ANLQIDQINTDLNLER		1	1	4	Q8VDD5	0	1869.97	935.484			4.421e-10	4.59	[K].ANLQIDQINTDLNLER.[S]	Q8VDD5 [1755-1770]	1.42742e+07	36.58
	ASIAALEAK		1	1	1	Q8VDD5	0	873.504	437.255			0.0005465	2.61	[K].ASIAALEAK.[I]	Q8VDD5 [1807-1815]	40141620	21.91
	ASREEILAQAK		1	1	2	Q8VDD5	1	1215.67	405.893			9.359e-07	2.88	[R].ASREEILAQAK.[E]	Q8VDD5 [1659-1669]	39587608	17.49
	ASREEILAQAKENEK		1	1	1	Q8VDD5	2	1715.89	572.634			2.281e-11	3.97	[R].ASREEILAQAKENEK.[K]	Q8VDD5 [1659-1673]	1.59083e+06	17.84
	DFSALESQLQDTQELLQEENR		1	1	1	Q8VDD5	0	2493.17	831.728			5.098e-09	3.23	[K].DFSALESQLQDTQELLQEENR.[Q]	Q8VDD5 [1302-1322]	3.67254e+06	46.43
	DFSALESQLQDTQELLQEENRQK		1	1	1	Q8VDD5	1	2749.33	917.116			4.186e-10	4.27	[K].DFSALESQLQDTQELLQEENRQK.[L]	Q8VDD5 [1302-1324]	635369	43.48
	DLEAHIDTANK		1	1	2	Q8VDD5	0	1226.6	613.807			1.279e-07	4.02	[K].DLEAHIDTANK.[N]	Q8VDD5 [1621-1631]	10729502	19.09
	DLEAHIDTANKNR		1	1	1	Q8VDD5	1	1496.75	499.586			0.002793	1.6	[K].DLEAHIDTANKNR.[E]	Q8VDD5 [1621-1633]
	DLEAHIDTANKNREEAIK		1	1	1	Q8VDD5	2	2067.05	689.687			1.486e-07	2.56	[K].DLEAHIDTANKNREEAIK.[Q]	Q8VDD5 [1621-1638]
	DLEGLSQR		1	1	2	Q8VDD5	0	917.469	459.237			0.02837	1.86	[K].DLEGLSQR.[L]	Q8VDD5 [1393-1400]	3.54129e+07	20.54
	DLEGLSQRLEEK		1	1	2	Q8VDD5	1	1416.73	708.872			1.059e-07	3.41	[K].DLEGLSQRLEEK.[V]	Q8VDD5 [1393-1404]	5330294	28.46
	DLGEELEALKTELEDTLDSTAAQQELR		1	1	1	Q8VDD5	1	3017.48	755.123			8.06e-06	1.95	[R].DLGEELEALKTELEDTLDSTAAQQELR.[S]	Q8VDD5 [1136-1162]
	DLQGRDEQSEEK		1	1	2	Q8VDD5	1	1433.65	717.328			0.0002874	1.66	[R].DLQGRDEQSEEK.[K]	Q8VDD5 [1572-1583]	6.16718e+06	10.04
	DVLLQVEDERR		1	1	2	Q8VDD5	1	1371.72	457.911			3.351e-05	2.67	[K].DVLLQVEDERR.[N]	Q8VDD5 [1846-1856]	1.19212e+07	26.39
	EEELQAALAR		1	2	1	Q8VDD5	0	1129.58	565.295			0.0008504	2.47	[K].EEELQAALAR.[LV]	Q8VDD5 [1082-1091]	869822	25.12
	EEILAQAK		1	1	1	Q8VDD5	0	901.499	451.253			0.04635	1.88	[R].EEILAQAK.[E]	Q8VDD5 [1662-1669]	6.94877e+06	18.25
	EEILAQAKENEK		1	1	1	Q8VDD5	1	1401.72	467.911			0.007645	1.3	[R].EEILAQAKENEK.[K]	Q8VDD5 [1662-1673]
	EKHLAAENR		1	1	1	Q8VDD5	1	1067.56	356.524			0.04562	1.07	[R].EKHLAAENR.[L]	Q8VDD5 [859-867]	5178279	5.61
	ELEDATETADAMNR		1	1	2	Q8VDD5	0	1565.67	783.34			1.108e-08	4.39	[R].ELEDATETADAMNR.[E]	Q8VDD5 [1899-1912]	12857672	22.87
	ELEDATETADAMNR	1xOxidation [M12]	1	1	3	Q8VDD5	0	1581.67	791.34			2.711e-09	3.89	[R].ELEDATETADAMNR.[E]	Q8VDD5 [1899-1912]	1.95586e+07	18.14
	ELETQISELQEDLESER		1	1	2	Q8VDD5	0	2047.97	1024.49			6.384e-08	2.84	[R].ELETQISELQEDLESER.[A]	Q8VDD5 [1108-1124]	2.28589e+06	40.13
	EMEAELEDER		1	1	1	Q8VDD5	0	1250.52	625.764			1.743e-05	2.61	[R].EMEAELEDER.[K]	Q8VDD5 [1593-1602]	4.51882e+06	21.18
	EMEAELEDER	1xOxidation [M2]	1	1	1	Q8VDD5	0	1266.52	633.759			0.002118	2.39	[R].EMEAELEDER.[K]	Q8VDD5 [1593-1602]	5239925	16.63
	EMEAELEDERK		1	1	2	Q8VDD5	1	1378.62	460.21			2.042e-08	2.53	[R].EMEAELEDERK.[Q]	Q8VDD5 [1593-1603]	4.40072e+06	18.14
	EMEAELEDERK	1xOxidation [M2]	1	1	1	Q8VDD5	1	1394.61	465.544			6.211e-07	2.94	[R].EMEAELEDERK.[Q]	Q8VDD5 [1593-1603]	4480986	13.8
	EMEAELEDERKQR		1	1	2	Q8VDD5	2	1662.78	554.928			3.079e-05	2.33	[R].EMEAELEDERKQR.[S]	Q8VDD5 [1593-1605]	2.1762e+06	17.06
	EMEAELEDERKQR	1xOxidation [M2]	1	1	2	Q8VDD5	2	1678.77	560.26			0.0001176	2.44	[R].EMEAELEDERKQR.[S]	Q8VDD5 [1593-1605]	1.60291e+06	13.13
	EQEVSILKK		1	1	1	Q8VDD5	1	1073.62	358.544			0.0007611	2.16	[R].EQEVSILKK.[T]	Q8VDD5 [1166-1174]	7.65387e+06	18.56
	EQLEEEEEAKR		1	1	2	Q8VDD5	1	1389.65	463.886			2.235e-06	3.19	[R].EQLEEEEEAKR.[N]	Q8VDD5 [1343-1353]	8.94972e+06	14.16
	ERNTDQASMPDNTAAQK		1	2	1	Q8VDD5	1	1876.85	626.287			0.007809	1.7	[K].ERNTDQASMPDNTAAQK.[V]	Q8VDD5 [357-373]	388954	14.19
	FLSNGHVTIPGQQDKDMFQETMEAMR	3xOxidation [M17; M22; M25]	1	1	2	Q8VDD5	1	3058.37	765.346			3.792e-07	2.75	[R].FLSNGHVTIPGQQDKDMFQETMEAMR.[I]	Q8VDD5 [302-327]	1.56092e+06	27.81
	GALALEEK		1	1	1	Q8VDD5	0	830.462	415.734			0.02696	1.95	[K].GALALEEK.[R]	Q8VDD5 [1717-1724]	13157882	19.49
	GALALEEKR		1	1	2	Q8VDD5	1	986.563	329.525			0.001577	2.12	[K].GALALEEKR.[R]	Q8VDD5 [1717-1725]	17635059	16.81
	GDLPFVVTR		1	1	1	Q8VDD5	0	1003.56	502.282			0.006017	1.69	[R].GDLPFVVTR.[R]	Q8VDD5 [1924-1932]	5.50979e+06	32.87
	GELANEVK		1	1	1	Q8VDD5	0	859.452	430.228			0.03778	1.65	[R].GELANEVK.[A]	Q8VDD5 [1227-1234]	1.16001e+06	15.19
	HEAMITDLEER		1	1	1	Q8VDD5	0	1343.63	672.312			2.775e-07	2.53	[K].HEAMITDLEER.[L]	Q8VDD5 [1025-1035]	1.27482e+06	24.31
	HEAMITDLEER	1xOxidation [M4]	1	1	2	Q8VDD5	0	1359.62	680.313			4.143e-07	2.75	[K].HEAMITDLEER.[L]	Q8VDD5 [1025-1035]	657237	20.9
	HEDELLAK		1	1	1	Q8VDD5	0	954.489	477.748			8.504e-05	3.29	[R].HEDELLAK.[E]	Q8VDD5 [843-850]	12890731	15.02
	HEMPPHIYAITDTAYR		1	1	5	Q8VDD5	0	1914.92	638.973			3.032e-08	3.53	[R].HEMPPHIYAITDTAYR.[S]	Q8VDD5 [144-159]	2.4431e+06	27.79
	HEMPPHIYAITDTAYR	1xOxidation [M3]	1	1	4	Q8VDD5	0	1930.91	644.309			7.931e-10	4.04	[R].HEMPPHIYAITDTAYR.[S]	Q8VDD5 [144-159]	8.14934e+06	26.23
	HLAAENR		1	1	2	Q8VDD5	0	810.422	405.714			0.011	2.46	[K].HLAAENR.[L]	Q8VDD5 [861-867]	3.01811e+06	5.44
	HSQAVEELADQLEQTK		1	1	2	Q8VDD5	0	1825.89	609.302			2.959e-10	3.5	[K].HSQAVEELADQLEQTK.[R]	Q8VDD5 [1194-1209]	1.42377e+06	31.11
	HSQAVEELADQLEQTKR		1	1	3	Q8VDD5	1	1981.99	661.337			3.836e-20	6.99	[K].HSQAVEELADQLEQTKR.[V]	Q8VDD5 [1194-1210]	1.17153e+07	29.04
	KAGKLDPHLVLDQLR		1	1	2	Q8VDD5	2	1703	568.335			1.617e-06	3.2	[K].KAGKLDPHLVLDQLR.[C]	Q8VDD5 [679-693]	1.585e+06	30.16
	KANLQIDQINTDLNLER		1	1	2	Q8VDD5	1	1998.06	999.534			2.912e-15	5.73	[K].KANLQIDQINTDLNLER.[S]	Q8VDD5 [1754-1770]	1.10076e+07	33.03
	KDQGELER		1	1	1	Q8VDD5	1	974.49	487.748			0.01465	1.56	[K].KDQGELER.[Q]	Q8VDD5 [202-209]	971894	7.12
	KEEELQAALAR		1	2	2	Q8VDD5	1	1257.68	629.345			8.348e-07	3.75	[K].KEEELQAALAR.[LV]	Q8VDD5 [1081-1091]	23320515	21.42
	KKLEMDLK		1	1	2	Q8VDD5	2	1004.58	502.791			0.0006292	2.37	[R].KKLEMDLK.[D]	Q8VDD5 [1613-1620]	4194977	16.38
	KKLEMDLK	1xOxidation [M5]	1	1	1	Q8VDD5	2	1020.58	510.791			0.04642	1.47	[R].KKLEMDLK.[D]	Q8VDD5 [1613-1620]	371986	9.95
	KKVEAQLQELQVK		1	1	3	Q8VDD5	2	1540.91	770.954			6.471e-12	5.02	[R].KKVEAQLQELQVK.[F]	Q8VDD5 [1248-1260]	1.91603e+07	21.76
	KLEEDQIIMEDQNCK	1xCarbamidomethyl [C14]	1	1	1	Q8VDD5	1	1892.87	631.629			8.094e-06	2.18	[K].KLEEDQIIMEDQNCK.[L]	Q8VDD5 [975-989]
	KLEEDQIIMEDQNCK	1xCarbamidomethyl [C14]; 1xOxidation [M9]	1	1	2	Q8VDD5	1	1908.87	954.933			7.255e-05	1.72	[K].KLEEDQIIMEDQNCK.[L]	Q8VDD5 [975-989]	276718	21.83
	KLEMDLK		1	1	1	Q8VDD5	1	876.486	438.747			0.01157	2.36	[K].KLEMDLK.[D]	Q8VDD5 [1614-1620]	1.5257e+06	20.23
	KLEMDLKDLEAHIDTANK	1xOxidation [M4]	1	1	2	Q8VDD5	2	2100.06	700.692			0.002041	1.6	[K].KLEMDLKDLEAHIDTANK.[N]	Q8VDD5 [1614-1631]
	KLKDVLLQVEDER		1	1	1	Q8VDD5	2	1584.9	528.969			0.01078	1.54	[K].KLKDVLLQVEDER.[R]	Q8VDD5 [1843-1855]	391214	29.92
	KLVWVPSSK		1	1	1	Q8VDD5	1	1043.62	348.546			0.05973	1.61	[K].KLVWVPSSK.[N]	Q8VDD5 [30-38]	335232	24.6
	KMEDGVGCLETAEEAK	1xCarbamidomethyl [C8]; 1xOxidation [M2]	1	1	1	Q8VDD5	1	1782.79	594.933			0.0002178	2.13	[K].KMEDGVGCLETAEEAK.[R]	Q8VDD5 [1372-1387]
	KMEDGVGCLETAEEAKR	1xCarbamidomethyl [C8]; 1xOxidation [M2]	1	1	1	Q8VDD5	2	1938.89	646.967			0.06655	1.59	[K].KMEDGVGCLETAEEAKR.[R]	Q8VDD5 [1372-1388]
	KMQQNIQELEEQLEEEESAR		1	1	1	Q8VDD5	1	2461.15	821.056			4.819e-13	3.96	[K].KMQQNIQELEEQLEEEESAR.[Q]	Q8VDD5 [940-959]	1.19179e+06	36.29
	KMQQNIQELEEQLEEEESAR	1xOxidation [M2]	1	1	1	Q8VDD5	1	2477.15	826.386			3.558e-14	5.3	[K].KMQQNIQELEEQLEEEESAR.[Q]	Q8VDD5 [940-959]	2.50933e+06	33.7
	KQELEEICHDLEAR	1xCarbamidomethyl [C8]	1	1	2	Q8VDD5	1	1769.85	590.619			2.332e-12	4.95	[K].KQELEEICHDLEAR.[V]	Q8VDD5 [910-923]	3858495	27.42
	KTLEDEAK		1	1	1	Q8VDD5	1	933.489	467.246			0.0362	1.23	[K].KTLEDEAK.[T]	Q8VDD5 [1174-1181]	746308	9.55
	KVEAQLQELQVK		1	1	2	Q8VDD5	1	1412.81	706.907			3.686e-10	3.89	[K].KVEAQLQELQVK.[F]	Q8VDD5 [1249-1260]	1.08343e+07	24.49
	IAQLEEELEEEQGNTELINDR		1	1	3	Q8VDD5	0	2472.17	1236.58			5.01e-13	4.62	[R].IAQLEEELEEEQGNTELINDR.[L]	Q8VDD5 [1731-1751]	1.802e+07	36.2
	IAQLEEELEEEQGNTELINDRLK		1	1	1	Q8VDD5	1	2713.35	905.122			4.418e-09	2.8	[R].IAQLEEELEEEQGNTELINDRLK.[K]	Q8VDD5 [1731-1753]
	IAQLEEQLDNETK		1	1	1	Q8VDD5	0	1530.76	765.887			7.888e-08	4.18	[K].IAQLEEQLDNETK.[E]	Q8VDD5 [1816-1828]	23986994	26.39
	IAQLEEQLDNETKER		1	1	2	Q8VDD5	1	1815.91	908.456			3.113e-10	4.33	[K].IAQLEEQLDNETKER.[Q]	Q8VDD5 [1816-1830]	23604278	25.48
	LEEDQIIMEDQNCK	1xCarbamidomethyl [C13]	1	1	1	Q8VDD5	0	1764.78	882.893			0.08378	0.92	[K].LEEDQIIMEDQNCK.[L]	Q8VDD5 [976-989]
	LEEDQIIMEDQNCK	1xCarbamidomethyl [C13]; 1xOxidation [M8]	1	1	1	Q8VDD5	0	1780.77	890.889			1.436e-06	2.51	[K].LEEDQIIMEDQNCK.[L]	Q8VDD5 [976-989]
	LEVNLQAMK		1	1	1	Q8VDD5	0	1045.57	523.289			0.003219	1.62	[R].LEVNLQAMK.[A]	Q8VDD5 [1558-1566]	6.1602e+06	29.04
	LEVNLQAMK	1xOxidation [M8]	1	1	4	Q8VDD5	0	1061.57	531.285			0.001092	1.57	[R].LEVNLQAMK.[A]	Q8VDD5 [1558-1566]	8.09274e+06	23.08
	LKDVLLQVEDER		1	1	1	Q8VDD5	1	1456.8	486.272			0.0115	2.12	[K].LKDVLLQVEDER.[R]	Q8VDD5 [1844-1855]	1.03325e+06	29.48
	LKDVLLQVEDERR		1	1	3	Q8VDD5	2	1612.9	806.956			1.659e-09	2.93	[K].LKDVLLQVEDERR.[N]	Q8VDD5 [1844-1856]	2.82873e+07	26.68
	LKNKHEAMITDLEER	1xOxidation [M8]	1	1	3	Q8VDD5	2	1842.94	614.985			3.049e-09	3.12	[K].LKNKHEAMITDLEER.[L]	Q8VDD5 [1021-1035]	1.53664e+06	17.74
	LKQMEDEKNSFR		1	1	1	Q8VDD5	2	1524.75	381.942			0.02973	2.58	[K].LKQMEDEKNSFR.[E]	Q8VDD5 [1331-1342]
	LKQMEDEKNSFR	1xOxidation [M4]	1	1	2	Q8VDD5	2	1540.74	514.251			1.313e-07	2.8	[K].LKQMEDEKNSFR.[E]	Q8VDD5 [1331-1342]	1.94025e+06	12.23
	LKSMEAEMIQLQEELAAAER	2xOxidation [M4; M8]	1	1	1	Q8VDD5	1	2322.13	774.716			0.00441	1.67	[K].LKSMEAEMIQLQEELAAAER.[A]	Q8VDD5 [1675-1694]
	IIGLDQVAGMSETALPGAFK		1	1	2	Q8VDD5	0	2018.06	673.36			3.261e-08	3.84	[R].IIGLDQVAGMSETALPGAFK.[T]	Q8VDD5 [618-637]	2.38749e+06	45.07
	IIGLDQVAGMSETALPGAFK	1xOxidation [M10]	1	1	2	Q8VDD5	0	2034.06	1017.53			2.891e-12	4.27	[R].IIGLDQVAGMSETALPGAFK.[T]	Q8VDD5 [618-637]	1.2338e+07	40.64
	IMGIPEDEQMGLLR	1xOxidation [M]	1	1	3	Q8VDD5	0	1617.8	809.403			1.113e-05	1.93	[R].IMGIPEDEQMGLLR.[V]	Q8VDD5 [328-341]	5320667	34.85
	IMGIPEDEQMGLLR	2xOxidation [M2; M10]	1	1	3	Q8VDD5	0	1633.79	817.399			1.662e-06	2.64	[R].IMGIPEDEQMGLLR.[V]	Q8VDD5 [328-341]	1.63252e+07	30.63
	LQEMESAVK	1xOxidation [M4]	1	1	1	Q8VDD5	0	1050.51	525.759			0.04696	0.74	[K].LQEMESAVK.[S]	Q8VDD5 [1794-1802]	7887998	13.05
	LQKDLEGLSQR		1	1	2	Q8VDD5	1	1286.71	429.573			0.004399	1.14	[R].LQKDLEGLSQR.[L]	Q8VDD5 [1390-1400]	880174	20.02
	LQQELDDLLVDLDHQR		1	1	6	Q8VDD5	0	1949.99	650.666			1.06e-14	3.52	[R].LQQELDDLLVDLDHQR.[Q]	Q8VDD5 [1418-1433]	6.84396e+06	41.57
	LQVELDSVTGLLSQSDSK		1	1	3	Q8VDD5	0	1919	959.997			1.801e-10	4.2	[K].LQVELDSVTGLLSQSDSK.[S]	Q8VDD5 [1278-1295]	1.35893e+06	41.52
	IRELETQISELQEDLESER		1	1	1	Q8VDD5	1	2317.15	773.056			7.017e-11	5.52	[K].IRELETQISELQEDLESER.[A]	Q8VDD5 [1106-1124]	1283463	39.32
	LTEMETMQSQLMAEK		1	1	1	Q8VDD5	0	1769.81	885.411			9.433e-09	3.36	[R].LTEMETMQSQLMAEK.[L]	Q8VDD5 [868-882]	1.19034e+06	32.95
	LTEMETMQSQLMAEK	1xOxidation [M]	1	1	3	Q8VDD5	0	1785.81	893.405			7.439e-09	3.75	[R].LTEMETMQSQLMAEK.[L]	Q8VDD5 [868-882]	3.97448e+06	29.44
	LTEMETMQSQLMAEK	2xOxidation [M7; M]	1	1	3	Q8VDD5	0	1801.8	901.403			2.092e-07	4.05	[R].LTEMETMQSQLMAEK.[L]	Q8VDD5 [868-882]	5.34713e+06	22.32
	LTEMETMQSQLMAEK	3xOxidation [M4; M7; M12]	1	1	1	Q8VDD5	0	1817.8	909.397			1.938e-08	3.93	[R].LTEMETMQSQLMAEK.[L]	Q8VDD5 [868-882]	2.56229e+06	18.78
	LVWVPSSK		1	1	1	Q8VDD5	0	915.53	458.268			0.01288	1.7	[K].LVWVPSSK.[N]	Q8VDD5 [31-38]	1.59076e+06	27.56
	MAQQAADKYLYVDK	1xMet-loss+Acetyl [N-Term]	1	1	1	Q8VDD5	1	1554.78	777.894			5.422e-11	4.46	[-].MAQQAADKYLYVDK.[N]	Q8VDD5 [1-14]	13174444	29.86
	MEDGVGCLETAEEAK	1xCarbamidomethyl [C7]; 1xOxidation [M1]	1	1	1	Q8VDD5	0	1654.69	827.851			6.531e-08	2.51	[K].MEDGVGCLETAEEAK.[R]	Q8VDD5 [1373-1387]
	MQQNIQELEEQLEEEESAR		1	1	2	Q8VDD5	0	2333.06	778.357			3.204e-09	3.52	[K].MQQNIQELEEQLEEEESAR.[Q]	Q8VDD5 [941-959]	1.12137e+06	38.22
	MQQNIQELEEQLEEEESAR	1xOxidation [M1]	1	1	2	Q8VDD5	0	2349.05	1175.03			7.705e-10	3.79	[K].MQQNIQELEEQLEEEESAR.[Q]	Q8VDD5 [941-959]	6132847	36.72
	NAEQFKDQADK		1	1	2	Q8VDD5	1	1293.61	647.305			2.115e-06	3.18	[R].NAEQFKDQADK.[A]	Q8VDD5 [1857-1867]	16362372	12.24
	NAEQFKDQADKASTR		1	1	3	Q8VDD5	2	1708.82	570.278			1.254e-11	3.54	[R].NAEQFKDQADKASTR.[L]	Q8VDD5 [1857-1871]	8.21418e+06	15.13
	NFINNPLAQADWAAK		1	1	2	Q8VDD5	0	1672.84	836.926			2.121e-08	2.71	[K].NFINNPLAQADWAAK.[K]	Q8VDD5 [15-29]	793843	38.64
	NGFEPASLKEEVGEEAIVELVENGKK		1	1	2	Q8VDD5	2	2815.44	939.151			0.0004135	1.19	[K].NGFEPASLKEEVGEEAIVELVENGKK.[V]	Q8VDD5 [39-64]	276736	41.35
	NKHEAMITDLEER		1	1	3	Q8VDD5	1	1585.76	793.384			7.441e-08	2.7	[K].NKHEAMITDLEER.[L]	Q8VDD5 [1023-1035]	4.37613e+06	21.67
	NKHEAMITDLEER	1xOxidation [M6]	1	1	6	Q8VDD5	1	1601.76	801.382			1.382e-07	2.47	[K].NKHEAMITDLEER.[L]	Q8VDD5 [1023-1035]	7.37922e+06	18.48
	NLPIYSEEIVEMYK		1	1	1	Q8VDD5	0	1727.86	864.435			1.902e-07	2.66	[K].NLPIYSEEIVEMYK.[G]	Q8VDD5 [126-139]	1.89997e+06	40.79
	NLPIYSEEIVEMYK	1xOxidation [M12]	1	1	2	Q8VDD5	0	1743.85	872.429			6.643e-07	3.4	[K].NLPIYSEEIVEMYK.[G]	Q8VDD5 [126-139]	9.98303e+06	37.24
	NMDPLNDNIATLLHQSSDK		1	1	1	Q8VDD5	0	2126.02	709.343			5.783e-05	2.13	[K].NMDPLNDNIATLLHQSSDK.[F]	Q8VDD5 [588-606]	386890	38.74
	NMDPLNDNIATLLHQSSDK	1xOxidation [M2]	1	1	1	Q8VDD5	0	2142.01	714.675			8.58e-10	3.25	[K].NMDPLNDNIATLLHQSSDK.[F]	Q8VDD5 [588-606]	2.26403e+06	36.25
	NSFREQLEEEEEAKR		1	1	2	Q8VDD5	2	1893.89	631.969			1.907e-09	4.33	[K].NSFREQLEEEEEAKR.[N]	Q8VDD5 [1339-1353]	2.03745e+06	22.71
	NTDQASMPDNTAAQK		1	2	1	Q8VDD5	0	1591.7	796.355			0.0375	1.53	[R].NTDQASMPDNTAAQK.[V]	Q8VDD5 [359-373]	7.0489e+06	15.38
	NTDQASMPDNTAAQK	1xOxidation [M7]	1	2	1	Q8VDD5	0	1607.7	804.351			1.098e-08	3.54	[R].NTDQASMPDNTAAQK.[V]	Q8VDD5 [359-373]	3522618	9.88
	QACVLMIK	1xCarbamidomethyl [C3]; 1xOxidation [M6]	1	1	1	Q8VDD5	0	978.511	489.758			0.01558	2.35	[K].QACVLMIK.[A]	Q8VDD5 [738-745]	1.8979e+06	23.69
	QAQQERDELADEIANSSGK		1	1	3	Q8VDD5	1	2088.98	1044.99			9.228e-13	3.94	[R].QAQQERDELADEIANSSGK.[G]	Q8VDD5 [1698-1716]	1.21378e+07	24.47
	QKHSQAVEELADQLEQTKR		1	1	3	Q8VDD5	2	2238.15	560.295			1.908e-07	3.98	[R].QKHSQAVEELADQLEQTKR.[V]	Q8VDD5 [1192-1210]	714171	26.94
	QIATLHAQVTDMK		1	1	2	Q8VDD5	0	1455.76	728.383			1.73e-07	3.13	[K].QIATLHAQVTDMK.[K]	Q8VDD5 [1358-1370]	2.09889e+06	23.56
	QIATLHAQVTDMK	1xOxidation [M12]	1	1	2	Q8VDD5	0	1471.76	736.381			1.404e-07	2.91	[K].QIATLHAQVTDMK.[K]	Q8VDD5 [1358-1370]	4.23669e+06	19.9
	QIATLHAQVTDMKK	1xOxidation [M12]	1	1	1	Q8VDD5	1	1599.85	400.717			1.728e-05	3.44	[K].QIATLHAQVTDMKK.[K]	Q8VDD5 [1358-1371]	1.56256e+06	17.33
	QLEEAEEEAQR		1	1	1	Q8VDD5	0	1331.61	666.306			8.959e-06	3.04	[R].QLEEAEEEAQR.[A]	Q8VDD5 [1878-1888]	11085171	16.56
	QMEDEKNSFR	1xOxidation [M2]	1	1	1	Q8VDD5	1	1299.56	650.286			0.07648	0.9	[K].QMEDEKNSFR.[E]	Q8VDD5 [1333-1342]	88232.8	10.84
	QQQLTAMK	1xOxidation [M7]	1	2	1	Q8VDD5	0	963.493	482.25			0.009895	2.2	[R].QQQLTAMK.[V]	Q8VDD5 [803-810]	882611	10.32
	QRYEILTPNSIPK		1	1	1	Q8VDD5	1	1558.86	779.931			0.0001427	3.07	[R].QRYEILTPNSIPK.[G]	Q8VDD5 [719-731]	3023642	28.74
	QSVSNLEK		1	1	1	Q8VDD5	0	904.473	452.739			0.00841	2.33	[R].QSVSNLEK.[K]	Q8VDD5 [1434-1441]	3.88344e+06	13.42
	QSVSNLEKK		1	1	1	Q8VDD5	1	1032.57	516.788			0.006152	1.44	[R].QSVSNLEKK.[Q]	Q8VDD5 [1434-1442]	494205	10.75
	QTLENERGELANEVK		1	1	2	Q8VDD5	1	1729.87	865.438			2.769e-09	3.72	[K].QTLENERGELANEVK.[A]	Q8VDD5 [1220-1234]	9.80804e+06	22.47
	REQEVSILKK		1	1	1	Q8VDD5	2	1229.72	410.577			0.0009052	2.81	[K].REQEVSILKK.[T]	Q8VDD5 [1165-1174]	710074	15.9
	RGDLPFVVTR		1	1	2	Q8VDD5	1	1159.66	580.334			1.417e-05	3.54	[R].RGDLPFVVTR.[R]	Q8VDD5 [1923-1932]	70807862	28.4
	RGDLPFVVTRR		1	1	1	Q8VDD5	2	1315.76	439.257			3.067e-06	3	[R].RGDLPFVVTRR.[I]	Q8VDD5 [1923-1933]	1.8824e+06	24.61
	RHEMPPHIYAITDTAYR		1	1	3	Q8VDD5	1	2071.02	691.012			3.269e-05	2.15	[K].RHEMPPHIYAITDTAYR.[S]	Q8VDD5 [143-159]	338696	25.96
	RHEMPPHIYAITDTAYR	1xOxidation [M4]	1	1	2	Q8VDD5	1	2087.01	696.341			3.166e-08	3.21	[K].RHEMPPHIYAITDTAYR.[S]	Q8VDD5 [143-159]	2.59416e+06	24.25
	RKLEGDSTDLSDQIAELQAQIAELK		1	1	1	Q8VDD5	2	2771.44	693.615			0.05104	0.89	[R].RKLEGDSTDLSDQIAELQAQIAELK.[M]	Q8VDD5 [1051-1075]	134183	44.64
	RNAEQFKDQADK		1	1	1	Q8VDD5	2	1449.71	483.908			0.002793	1.64	[R].RNAEQFKDQADK.[A]	Q8VDD5 [1856-1867]	396516	10.6
	RQAQQERDELADEIANSSGK		1	1	2	Q8VDD5	2	2245.08	749.031			1.395e-08	4.49	[K].RQAQQERDELADEIANSSGK.[G]	Q8VDD5 [1697-1716]	2.96307e+06	22.5
	RQLEEAEEEAQR		1	1	2	Q8VDD5	1	1487.71	744.359			5.662e-10	4.25	[K].RQLEEAEEEAQR.[A]	Q8VDD5 [1877-1888]	4.67809e+06	15.6
	RQQQLTAMK		1	2	1	Q8VDD5	1	1103.6	552.302			0.006264	2.73	[K].RQQQLTAMK.[V]	Q8VDD5 [802-810]	2053978	13.08
	SMAMAAR	1xOxidation [M4]	1	1	1	Q8VDD5	0	753.338	377.172			0.0489	1.38	[R].SMAMAAR.[K]	Q8VDD5 [1606-1612]	735042	7.17
	SMEAEMIQLQEELAAAER		1	1	2	Q8VDD5	0	2048.96	1024.99			1.123e-05	2.13	[K].SMEAEMIQLQEELAAAER.[A]	Q8VDD5 [1677-1694]	713800	45.96
	SMEAEMIQLQEELAAAER	1xOxidation [M]	1	1	4	Q8VDD5	0	2064.96	1032.99			2.688e-13	4.39	[K].SMEAEMIQLQEELAAAER.[A]	Q8VDD5 [1677-1694]	2.63434e+06	40.26
	SMEAEMIQLQEELAAAER	2xOxidation [M2; M6]	1	1	2	Q8VDD5	0	2080.95	1040.98			7.837e-14	4.79	[K].SMEAEMIQLQEELAAAER.[A]	Q8VDD5 [1677-1694]	5.12609e+06	34.3
	SMMQDREDQSILCTGESGAGK	1xCarbamidomethyl [C13]	1	1	1	Q8VDD5	1	2300	767.335			6.628e-08	3.05	[R].SMMQDREDQSILCTGESGAGK.[T]	Q8VDD5 [160-180]
	SMMQDREDQSILCTGESGAGK	1xCarbamidomethyl [C13]; 1xOxidation [M3]	1	1	1	Q8VDD5	1	2315.99	772.667			1.159e-09	3.28	[R].SMMQDREDQSILCTGESGAGK.[T]	Q8VDD5 [160-180]	1106588	22.79
	SMMQDREDQSILCTGESGAGK	1xCarbamidomethyl [C13]; 2xOxidation [M2; M3]	1	1	1	Q8VDD5	1	2331.98	777.999			1.056e-10	3.37	[R].SMMQDREDQSILCTGESGAGK.[T]	Q8VDD5 [160-180]	1.34781e+06	21.08
	SVHELEK		1	1	1	Q8VDD5	0	841.441	421.224			0.04946	1.69	[K].SVHELEK.[S]	Q8VDD5 [1519-1525]	6.07333e+06	8.58
	TDLLLEPYNK		1	1	1	Q8VDD5	0	1205.64	603.326			0.00151	2.8	[K].TDLLLEPYNK.[Y]	Q8VDD5 [290-299]	22052362	31.03
	TDLLLEPYNKYR		1	1	2	Q8VDD5	1	1524.81	508.939			6.1e-07	3.22	[K].TDLLLEPYNKYR.[F]	Q8VDD5 [290-301]	4.38328e+06	30.22
	TELADKVTK		1	1	1	Q8VDD5	1	1004.56	335.524			0.0001836	2.55	[R].TELADKVTK.[L]	Q8VDD5 [1269-1277]	2.68894e+06	14.11
	TEMEDLMSSK		1	1	1	Q8VDD5	0	1170.5	585.753			0.0009192	1.76	[R].TEMEDLMSSK.[D]	Q8VDD5 [1504-1513]	1.89382e+06	25.65
	TEMEDLMSSK	1xOxidation [M]	1	1	2	Q8VDD5	0	1186.5	593.751			0.0009219	1.39	[R].TEMEDLMSSK.[D]	Q8VDD5 [1504-1513]	1.58474e+06	18.26
	TEMEDLMSSK	2xOxidation [M3; M7]	1	1	1	Q8VDD5	0	1202.49	601.748			0.00184	1.39	[R].TEMEDLMSSK.[D]	Q8VDD5 [1504-1513]	572952	12.09
	TEMEDLMSSKDDVGK		1	1	2	Q8VDD5	1	1684.74	842.875			5.235e-09	3.48	[R].TEMEDLMSSKDDVGK.[S]	Q8VDD5 [1504-1518]	5.91602e+06	25.86
	TEMEDLMSSKDDVGK	1xOxidation [M]	1	1	4	Q8VDD5	1	1700.74	850.87			1.306e-09	3.72	[R].TEMEDLMSSKDDVGK.[S]	Q8VDD5 [1504-1518]	7.01144e+06	20.1
	TEMEDLMSSKDDVGK	2xOxidation [M3; M7]	1	1	2	Q8VDD5	1	1716.73	858.868			2.929e-10	3.35	[R].TEMEDLMSSKDDVGK.[S]	Q8VDD5 [1504-1518]	5.32632e+06	15.49
	TFHIFYYLLSGAGEHLK		1	1	2	Q8VDD5	0	1996.03	666.017			0.0002203	2.42	[R].TFHIFYYLLSGAGEHLK.[T]	Q8VDD5 [273-289]	545779	45.49
	TFHIFYYLLSGAGEHLKTDLLLEPYNK		1	1	2	Q8VDD5	1	3182.66	796.418			5.857e-07	2.68	[R].TFHIFYYLLSGAGEHLKTDLLLEPYNK.[Y]	Q8VDD5 [273-299]	455733	50.71
	THEAQIQEMR		1	1	2	Q8VDD5	0	1242.59	621.798			5.596e-06	3.04	[K].THEAQIQEMR.[Q]	Q8VDD5 [1182-1191]	4174138	15.3
	THEAQIQEMR	1xOxidation [M9]	1	1	2	Q8VDD5	0	1258.58	420.2			0.003407	2.24	[K].THEAQIQEMR.[Q]	Q8VDD5 [1182-1191]	3.21215e+06	10.67
	TLEDEAK		1	1	1	Q8VDD5	0	805.394	403.2			0.0486	1.63	[K].TLEDEAK.[T]	Q8VDD5 [1175-1181]	1.58945e+06	11.21
	TLEDEAKTHEAQIQEMR		1	1	2	Q8VDD5	1	2028.97	676.993			3.534e-10	3.47	[K].TLEDEAKTHEAQIQEMR.[Q]	Q8VDD5 [1175-1191]	2844132	26.24
	TLEDEAKTHEAQIQEMR	1xOxidation [M16]	1	1	2	Q8VDD5	1	2044.96	682.321			2.012e-08	3.63	[K].TLEDEAKTHEAQIQEMR.[Q]	Q8VDD5 [1175-1191]	7.18875e+06	22.78
	TVGQLYKEQLAK		1	1	2	Q8VDD5	1	1377.77	689.386			1.193e-06	2.75	[R].TVGQLYKEQLAK.[L]	Q8VDD5 [645-656]	9.54541e+06	21.97
	VAAYDKLEK		1	1	2	Q8VDD5	1	1036.57	346.193			0.001214	2.41	[K].VAAYDKLEK.[T]	Q8VDD5 [1405-1413]	37650581	16.7
	VAEFTTNLMEEEEK		1	1	1	Q8VDD5	0	1669.76	835.382			1.624e-07	3.39	[R].VAEFTTNLMEEEEK.[S]	Q8VDD5 [1001-1014]	1.81229e+06	31.73
	VAEFTTNLMEEEEK	1xOxidation [M9]	1	1	1	Q8VDD5	0	1685.76	843.383			2.776e-08	3.04	[R].VAEFTTNLMEEEEK.[S]	Q8VDD5 [1001-1014]	2.56403e+06	27.04
	VAEFTTNLMEEEEKSK		1	1	4	Q8VDD5	1	1884.89	628.966			8.788e-10	3.84	[R].VAEFTTNLMEEEEKSK.[S]	Q8VDD5 [1001-1016]	5.88155e+06	29.14
	VAEFTTNLMEEEEKSK	1xOxidation [M9]	1	1	3	Q8VDD5	1	1900.88	634.299			3.662e-09	3.81	[R].VAEFTTNLMEEEEKSK.[S]	Q8VDD5 [1001-1016]	9.75057e+06	24.97
	VEAQLQELQVK		1	1	1	Q8VDD5	0	1284.72	642.861			1.728e-06	3.42	[K].VEAQLQELQVK.[F]	Q8VDD5 [1250-1260]	4682921	27.25
	VEEEAAQK		1	1	1	Q8VDD5	0	903.442	452.224			0.001621	1.36	[R].VEEEAAQK.[N]	Q8VDD5 [1092-1099]	589296	5.92
	VEEEEERCQYLQAEK	1xCarbamidomethyl [C8]	1	1	2	Q8VDD5	1	1939.87	647.295			3.054e-06	2.8	[R].VEEEEERCQYLQAEK.[K]	Q8VDD5 [924-938]	1.43811e+06	19.67
	VEEEEERCQYLQAEKK	1xCarbamidomethyl [C8]	1	1	1	Q8VDD5	2	2067.97	689.995			0.004657	1.67	[R].VEEEEERCQYLQAEKK.[K]	Q8VDD5 [924-939]
	VKATLEK		1	1	1	Q8VDD5	1	788.488	394.746			0.08019	1.5	[R].VKATLEK.[A]	Q8VDD5 [1211-1217]	1.62065e+06	9.42
	VKPLLNSIR		1	1	2	Q8VDD5	0	1039.66	347.224			0.004186	2.88	[K].VKPLLNSIR.[H]	Q8VDD5 [834-842]	30149960	22.68
	VKPLLNSIRHEDELLAK		1	1	2	Q8VDD5	1	1975.13	659.049			4.942e-05	2.17	[K].VKPLLNSIRHEDELLAK.[E]	Q8VDD5 [834-850]	8.12172e+06	28
	VKVNKDDIQK		1	1	2	Q8VDD5	2	1186.68	593.842			1.015e-06	2.49	[K].VKVNKDDIQK.[M]	Q8VDD5 [65-74]	8.23439e+06	11.93
	VISGVLQLGNIAFK		1	1	3	Q8VDD5	0	1458.87	729.938			3.284e-08	3.2	[R].VISGVLQLGNIAFK.[K]	Q8VDD5 [342-355]	8.78563e+06	42.7
	VISGVLQLGNIAFKK		1	1	2	Q8VDD5	1	1586.96	793.987			1e-09	3.66	[R].VISGVLQLGNIAFKK.[E]	Q8VDD5 [342-356]	29267430	37.96
	VNKDDIQK		1	1	2	Q8VDD5	1	959.516	480.26			0.002821	2.53	[K].VNKDDIQK.[M]	Q8VDD5 [67-74]	5.82249e+06	7.79
	VRTELADKVTK		1	1	2	Q8VDD5	2	1259.73	420.581			2.141e-08	3.92	[R].VRTELADKVTK.[L]	Q8VDD5 [1267-1277]	9.73659e+06	15.21
	VSHLLGINVTDFTR		1	1	2	Q8VDD5	0	1571.85	786.429			1.762e-05	2.74	[K].VSHLLGINVTDFTR.[G]	Q8VDD5 [374-387]	56107055	36.34
	VVFQEFR		1	1	2	Q8VDD5	0	924.494	462.748			0.04254	1.05	[R].VVFQEFR.[Q]	Q8VDD5 [712-718]	78738048	27.62
	VVQEQGTHPK		1	1	2	Q8VDD5	0	1122.59	561.798			7.488e-05	2.64	[K].VVQEQGTHPK.[F]	Q8VDD5 [546-555]	1.43697e+07	6.34
	YEILTPNSIPK		1	1	2	Q8VDD5	0	1274.7	637.853			4.259e-05	2.41	[R].YEILTPNSIPK.[G]	Q8VDD5 [721-731]	11734063	31.84
	YKASIAALEAK		1	1	2	Q8VDD5	1	1164.66	582.833			7.349e-05	2.69	[K].YKASIAALEAK.[I]	Q8VDD5 [1805-1815]	7666729	22.88
	YLYVDKNFINNPLAQADWAAK		1	1	1	Q8VDD5	1	2454.25	818.753			5.919e-05	2.13	[K].YLYVDKNFINNPLAQADWAAK.[K]	Q8VDD5 [9-29]
	ADFCIIHYAGK	1xCarbamidomethyl [C4]	2	2	2	Q8VDD5; Q61879	0	1294.62	647.817			2.107e-06	3.15	[K].ADFCIIHYAGK.[V]	Q8VDD5 [566-576]; Q61879 [573-583]	7.83246e+06	29.26
	AGKLDPHLVLDQLR		2	2	3	Q8VDD5; Q61879	1	1574.9	787.955			8.876e-09	2.97	[KR].AGKLDPHLVLDQLR.[C]	Q8VDD5 [680-693]; Q61879 [687-700]	7591423	32.93
	AGVLAHLEEER		2	2	2	Q8VDD5; Q61879	0	1223.64	408.549			2.342e-06	2.91	[R].AGVLAHLEEER.[D]	Q8VDD5 [765-775]; Q61879 [772-782]	18073725	24.55
	AGVLAHLEEERDLK		2	2	3	Q8VDD5; Q61879	1	1579.84	527.284			1.256e-10	4.54	[R].AGVLAHLEEERDLK.[I]	Q8VDD5 [765-778]; Q61879 [772-785]	15804991	26.05
	CIIPNHEK	1xCarbamidomethyl [C1]	2	3	1	Q8VDD5; Q61879	0	1010.51	337.507			0.006252	1.85	[R].CIIPNHEK.[RK]	Q8VDD5 [671-678]; Q61879 [678-685]	534370	15.77
	DKADFCIIHYAGK	1xCarbamidomethyl [C6]	2	2	1	Q8VDD5; Q61879	1	1537.75	513.253			4.129e-10	3.87	[K].DKADFCIIHYAGK.[V]	Q8VDD5 [564-576]; Q61879 [571-583]	2177022	27.46
	DRAEAEAR		2	3	1	Q8VDD5; Q61879	1	917.444	459.224			0.01693	1.75	[R].DRAEAEAR.[E]	Q8VDD5 [1465-1472]; Q61879 [1472-1479]	954623	4.5
	KVIQYLAHVASSHK		2	2	2	Q8VDD5; Q61879	1	1580.89	527.634			1.814e-13	6.16	[K].KVIQYLAHVASSHK.[SG]	Q8VDD5 [186-199]; Q61879 [190-203]	7.81264e+06	23.52
	LDPHLVLDQLR		2	2	4	Q8VDD5; Q61879	0	1318.75	659.878			8.434e-06	2.17	[K].LDPHLVLDQLR.[C]	Q8VDD5 [683-693]; Q61879 [690-700]	22969179	35.65
	LQQLFNHTMFILEQEEYQR	1xOxidation [M9]	2	3	1	Q8VDD5; Q61879	0	2483.2	828.406			4.368e-07	1.92	[K].LQQLFNHTMFILEQEEYQR.[E]	Q8VDD5 [476-494]; Q61879 [483-501]	1.70608e+06	36.84
	NTNPNFVR		2	2	3	Q8VDD5; Q61879	0	961.485	481.245			0.02044	1.49	[R].NTNPNFVR.[C]	Q8VDD5 [663-670]; Q61879 [670-677]	30591544	17.26
	TQLEELEDELQATEDAK		2	2	2	Q8VDD5; Q61879	0	1961.92	981.464			8.059e-11	4.03	[KR].TQLEELEDELQATEDAK.[L]	Q8VDD5 [1539-1555]; Q61879 [1546-1562]	2.80341e+06	39.05
	VDYKADEWLMK	1xOxidation [M10]	2	2	1	Q8VDD5; Q61879	1	1413.67	471.895			0.009082	1.28	[K].VDYKADEWLMK.[N]	Q8VDD5 [577-587]; Q61879 [584-594]	873282	27.07
	VEEEEER		2	2	1	Q8VDD5; Q61879	0	919.4	460.203			0.04527	1.13	[R].VEEEEER.[CN]	Q8VDD5 [924-930]; Q61879 [931-937]	262127	6.6
	VIQYLAHVASSHK		2	2	6	Q8VDD5; Q61879	0	1452.8	726.901			9.821e-09	4.14	[K].VIQYLAHVASSHK.[SG]	Q8VDD5 [187-199]; Q61879 [191-203]	57453781	22.73
	YAEERDRAEAEAR		2	2	1	Q8VDD5; Q61879	2	1565.73	783.368			0.01519	0.94	[KR].YAEERDRAEAEAR.[E]	Q8VDD5 [1460-1472]; Q61879 [1467-1479]	1.11597e+06	12.3
	ATDKSFVEK		2	3	2	Q8VDD5; Q6URW6	1	1024.53	512.768			0.000147	2.41	[K].ATDKSFVEK.[LV]	Q8VDD5 [537-545]; Q6URW6 [567-575]	4.04627e+06	12.19
	EQADFAIEALAK		2	3	8	Q8VDD5; Q6URW6	0	1305.67	653.337			1.46e-05	2.23	[K].EQADFAIEALAK.[A]	Q8VDD5 [408-419]; Q6URW6 [438-449]	3.79641e+07	34.47
	QLLQANPILEAFGNAK		2	3	7	Q8VDD5; Q6URW6	0	1726.95	863.979			2.249e-09	3.93	[KR].QLLQANPILEAFGNAK.[T]	Q8VDD5 [210-225]; Q6URW6 [241-256]	1.37145e+07	44.16
	CNGVLEGIR	1xCarbamidomethyl [C1]	3	11	1	Q8VDD5; Q6URW6; Q61879	0	1017.51	509.261			0.001598	2.46	[R].CNGVLEGIR.[I]	Q8VDD5 [694-702]; Q6URW6 [722-730]; Q61879 [701-709]	477359	24
	EDQSILCTGESGAGK	1xCarbamidomethyl [C7]	3	4	1	Q8VDD5; Q6URW6; Q61879	0	1551.7	776.351			5.49e-07	3.25	[R].EDQSILCTGESGAGK.[T]	Q8VDD5 [166-180]; Q6URW6 [186-200]; Q61879 [170-184]	1.00848e+06	22.08
	FDQLLAEEK		3	4	1	Q8VDD5; Q6URW6; Q61879	0	1092.56	546.782			0.0004417	2.69	[K].FDQLLAEEK.[NTAG]	Q8VDD5 [1446-1454]; Q6URW6 [1474-1482]; Q61879 [1453-1461]	14959791	25.41
	KFDQLLAEEK		3	4	1	Q8VDD5; Q6URW6; Q61879	1	1220.65	610.828			2.135e-07	3.61	[KR].KFDQLLAEEK.[NTAG]	Q8VDD5 [1445-1454]; Q6URW6 [1473-1482]; Q61879 [1452-1461]	33216896	24.33
	QKLQLEK		3	4	1	Q8VDD5; Q6URW6; Q61879	1	886.536	443.771			0.06856	1.54	[R].QKLQLEK.[V]	Q8VDD5 [960-966]; Q6URW6 [988-994]; Q61879 [967-973]	1.08437e+06	13.91
P60710	Actin, cytoplasmic 1 OS=Mus musculus OX=10090 GN=Actb PE=1 SV=1	620.66	94	41	476	1	375	41.7	5.48
	Sequence	Modifications	# Protein Groups	# Proteins	# PSMs	Master Protein Accessions	# Missed Cleavages	Theo. MH+ [Da]	m/z [Da] (by Search Engine): Sequest HT			Percolator PEP (by Search Engine): Sequest HT	XCorr (by Search Engine): Sequest HT	Annotated Sequence	Positions in Master Proteins	Abundance: F5: Sample	Top Apex RT [min]
	MDDDIAALVVDNGSGMCK	1xCarbamidomethyl [C17]; 1xMet-loss+Acetyl [N-Term]	1	1	6	P60710	0	1821.8	911.403			6.386e-11	4.31	[-].MDDDIAALVVDNGSGMCK.[A]	P60710 [1-18]	1.27718e+07	42.09
	MDDDIAALVVDNGSGMCK	1xCarbamidomethyl [C17]; 1xOxidation [M16]; 1xMet-loss+Acetyl [N-Term]	1	1	9	P60710	0	1837.79	919.401			3.694e-09	3.33	[-].MDDDIAALVVDNGSGMCK.[A]	P60710 [1-18]	3.97233e+07	39.39
	CPEALFQPSFLGMESCGIHETTFNSIMK	2xCarbamidomethyl [C1; C16]; 2xOxidation [M13; M27]	2	2	1	P60710; P63260	0	3263.45	1088.49			0.0009692	2.1	[R].CPEALFQPSFLGMESCGIHETTFNSIMK.[C]	P60710 [257-284]; P63260 [257-284]	525429	40.58
	DLYANTVLSGGTTMYPGIADR		2	2	7	P60710; P63260	0	2215.07	1108.04			4.809e-09	3.31	[K].DLYANTVLSGGTTMYPGIADR.[M]	P60710 [292-312]; P63260 [292-312]	3.83304e+07	39.9
	DLYANTVLSGGTTMYPGIADR	1xOxidation [M14]	2	2	19	P60710; P63260	0	2231.06	1116.04			1.467e-13	4.95	[K].DLYANTVLSGGTTMYPGIADR.[M]	P60710 [292-312]; P63260 [292-312]	2.23198e+08	36.93
	DLYANTVLSGGTTMYPGIADRMQK	2xOxidation [M14; M22]	2	2	1	P60710; P63260	1	2634.25	878.754			0.02472	0.96	[K].DLYANTVLSGGTTMYPGIADRMQK.[E]	P60710 [292-315]; P63260 [292-315]
	EKLCYVALDFEQEMATAASSSSLEK	1xCarbamidomethyl [C4]; 1xOxidation [M14]	2	2	2	P60710; P63260	1	2823.31	941.777			1.163e-09	4.09	[K].EKLCYVALDFEQEMATAASSSSLEK.[S]	P60710 [214-238]; P63260 [214-238]	1.72688e+06	36.4
	EKMTQIMFETFNTPAMYVAIQAVLSLYASGR	3xOxidation [M3; M7; M16]	2	2	1	P60710; P63260	1	3558.73	1186.91			0.0002551	1.42	[R].EKMTQIMFETFNTPAMYVAIQAVLSLYASGR.[T]	P60710 [117-147]; P63260 [117-147]	234018	51.86
	FRCPEALFQPSFLGMESCGIHETTFNSIMK	2xCarbamidomethyl [C3; C18]; 2xOxidation [M15; M29]	2	2	1	P60710; P63260	1	3566.62	892.401			0.01118	1.87	[R].FRCPEALFQPSFLGMESCGIHETTFNSIMK.[C]	P60710 [255-284]; P63260 [255-284]
	GYSFTTTAER		2	2	40	P60710; P63260	0	1132.53	566.766			0.0009757	2.27	[R].GYSFTTTAER.[E]	P60710 [197-206]; P63260 [197-206]	1.14659e+09	22.05
	GYSFTTTAEREIVR		2	2	2	P60710; P63260	1	1629.82	815.413			2.714e-05	3.12	[R].GYSFTTTAEREIVR.[D]	P60710 [197-210]; P63260 [197-210]	7.76513e+06	28.77
	KDLYANTVLSGGTTMYPGIADR		2	2	1	P60710; P63260	1	2343.16	1172.09			2.273e-16	4.49	[R].KDLYANTVLSGGTTMYPGIADR.[M]	P60710 [291-312]; P63260 [291-312]	951328	34.82
	KDLYANTVLSGGTTMYPGIADR	1xOxidation [M15]	2	2	6	P60710; P63260	1	2359.16	1180.09			1.063e-16	5.6	[R].KDLYANTVLSGGTTMYPGIADR.[M]	P60710 [291-312]; P63260 [291-312]	4.43219e+07	32.19
	LCYVALDFEQEMATAASSSSLEK	1xCarbamidomethyl [C2]	2	2	2	P60710; P63260	0	2550.17	850.728			0.001087	1.61	[K].LCYVALDFEQEMATAASSSSLEK.[S]	P60710 [216-238]; P63260 [216-238]	4183473	45.67
	LCYVALDFEQEMATAASSSSLEK	1xCarbamidomethyl [C2]; 1xOxidation [M12]	2	2	7	P60710; P63260	0	2566.17	1283.59			3.541e-10	3.14	[K].LCYVALDFEQEMATAASSSSLEK.[S]	P60710 [216-238]; P63260 [216-238]	1.43093e+07	38.26
	ILTERGYSFTTTAER		2	2	1	P60710; P63260	1	1744.89	582.296			5.705e-06	3.71	[K].ILTERGYSFTTTAER.[E]	P60710 [192-206]; P63260 [192-206]	1075158	25.96
	MTQIMFETFNTPAMYVAIQAVLSLYASGR	3xOxidation [M1; M5; M14]	2	2	2	P60710; P63260	0	3301.59	826.15			1.39e-05	2.12	[K].MTQIMFETFNTPAMYVAIQAVLSLYASGR.[T]	P60710 [119-147]; P63260 [119-147]	1.6428e+06	52.95
	QEYDESGPSIVHR		2	2	8	P60710; P63260	0	1516.7	506.239			2.306e-08	3.18	[K].QEYDESGPSIVHR.[K]	P60710 [360-372]; P63260 [360-372]	2.6472e+08	20.22
	QEYDESGPSIVHRK		2	2	2	P60710; P63260	1	1644.8	548.935			1.362e-08	4.47	[K].QEYDESGPSIVHRK.[C]	P60710 [360-373]; P63260 [360-373]	10638810	17.33
	VAPEEHPVLLTEAPLNPK		2	2	45	P60710; P63260	0	1954.06	977.535			5.493e-14	5.98	[R].VAPEEHPVLLTEAPLNPK.[A]	P60710 [96-113]; P63260 [96-113]	1.6146e+09	31.47
	VAPEEHPVLLTEAPLNPKANR		2	2	1	P60710; P63260	1	2295.25	765.752			9.421e-10	3.69	[R].VAPEEHPVLLTEAPLNPKANR.[E]	P60710 [96-116]; P63260 [96-116]	587469	34.67
	VAPEEHPVLLTEAPLNPKANREK		2	2	1	P60710; P63260	2	2552.38	638.85			0.003291	2	[R].VAPEEHPVLLTEAPLNPKANREK.[M]	P60710 [96-118]; P63260 [96-118]
	AGFAGDDAPR		3	6	45	P60710; P68033; P63260	0	976.448	488.727			5.632e-05	2.41	[K].AGFAGDDAPR.[A]	P60710 [19-28]; P68033 [21-30]; P63260 [19-28]	1.21638e+09	16.98
	AGFAGDDAPRAVFPSIVGRPR		3	6	3	P60710; P68033; P63260	1	2156.14	719.383			5.774e-06	2.12	[K].AGFAGDDAPRAVFPSIVGRPR.[H]	P60710 [19-39]; P68033 [21-41]; P63260 [19-39]	3711233	33.01
	AVFPSIVGRPR		3	6	35	P60710; P68033; P63260	0	1198.71	400.238			2.152e-05	2.12	[R].AVFPSIVGRPR.[H]	P60710 [29-39]; P68033 [31-41]; P63260 [29-39]	1.25267e+09	28.02
	DSYVGDEAQSK		3	6	7	P60710; P68033; P63260	0	1198.52	599.762			4.102e-05	2.08	[K].DSYVGDEAQSK.[R]	P60710 [51-61]; P68033 [53-63]; P63260 [51-61]	2.2295e+08	14.76
	DSYVGDEAQSKR		3	6	12	P60710; P68033; P63260	1	1354.62	452.21			6.572e-07	2.61	[K].DSYVGDEAQSKR.[G]	P60710 [51-62]; P68033 [53-64]; P63260 [51-62]	2.89175e+08	13.74
	EITALAPSTMK		3	6	15	P60710; P68033; P63260	0	1161.62	581.313			9.24e-05	2.73	[K].EITALAPSTMK.[I]	P60710 [316-326]; P68033 [318-328]; P63260 [316-326]	5.99506e+08	26.39
	EITALAPSTMK	1xOxidation [M10]	3	6	17	P60710; P68033; P63260	0	1177.61	589.308			4.678e-05	2.52	[K].EITALAPSTMK.[I]	P60710 [316-326]; P68033 [318-328]; P63260 [316-326]	6.60668e+08	22.22
	EITALAPSTMKIK		3	6	2	P60710; P68033; P63260	1	1402.8	701.902			9.912e-05	1.98	[K].EITALAPSTMKIK.[I]	P60710 [316-328]; P68033 [318-330]; P63260 [316-328]
	EITALAPSTMKIK	1xOxidation [M10]	3	6	2	P60710; P68033; P63260	1	1418.79	709.898			0.000461	2.71	[K].EITALAPSTMKIK.[I]	P60710 [316-328]; P68033 [318-330]; P63260 [316-328]	1.06086e+06	23.42
	EIVRDIKEK		3	6	1	P60710; P68033; P63260	2	1129.66	565.332			0.001298	1.98	[R].EIVRDIKEK.[L]	P60710 [207-215]; P68033 [209-217]; P63260 [207-215]	1.36805e+06	20.01
	HQGVMVGMGQKDSYVGDEAQSK	1xOxidation [M]	3	6	5	P60710; P68033; P63260	1	2367.07	789.695			0.0002058	2.38	[R].HQGVMVGMGQKDSYVGDEAQSK.[R]	P60710 [40-61]; P68033 [42-63]; P63260 [40-61]	312557	20.37
	HQGVMVGMGQKDSYVGDEAQSK	2xOxidation [M5; M8]	3	6	1	P60710; P68033; P63260	1	2383.07	596.52			6.558e-05	2.4	[R].HQGVMVGMGQKDSYVGDEAQSK.[R]	P60710 [40-61]; P68033 [42-63]; P63260 [40-61]
	HQGVMVGMGQKDSYVGDEAQSKR		3	6	1	P60710; P68033; P63260	2	2507.18	627.548			3.253e-08	1.98	[R].HQGVMVGMGQKDSYVGDEAQSKR.[G]	P60710 [40-62]; P68033 [42-64]; P63260 [40-62]
	HQGVMVGMGQKDSYVGDEAQSKR	2xOxidation [M5; M8]	3	6	2	P60710; P68033; P63260	2	2539.17	635.544			1.673e-12	3.72	[R].HQGVMVGMGQKDSYVGDEAQSKR.[G]	P60710 [40-62]; P68033 [42-64]; P63260 [40-62]	711664	16.4
	IWHHTFYNELR		3	4	6	P60710; P68033; P63260	0	1515.75	505.92			6.992e-05	3.08	[K].IWHHTFYNELR.[V]	P60710 [85-95]; P68033 [87-97]; P63260 [85-95]	5.25034e+07	25.4
	MQKEITALAPSTMK	2xOxidation [M1; M13]	3	6	3	P60710; P68033; P63260	1	1580.8	527.605			0.0004273	1.8	[R].MQKEITALAPSTMK.[I]	P60710 [313-326]; P68033 [315-328]; P63260 [313-326]	828931	20.22
	CDVDIRK	1xCarbamidomethyl [C1]	3	3	1	Q8BFZ3; P60710; P63260	1	905.451	302.488			0.0009742	2.2	[K].CDVDIRK.[D]	Q8BFZ3 [286-292]; P60710 [285-291]; P63260 [285-291]	3.2306e+06	12.4
	TTGIVMDSGDGVTHTVPIYEGYALPHAILR		3	3	9	Q8BFZ3; P60710; P63260	0	3183.61	1061.87			3.942e-13	3.97	[R].TTGIVMDSGDGVTHTVPIYEGYALPHAILR.[L]	Q8BFZ3 [149-178]; P60710 [148-177]; P63260 [148-177]	6.88742e+07	40.52
	TTGIVMDSGDGVTHTVPIYEGYALPHAILR	1xOxidation [M6]	3	3	22	Q8BFZ3; P60710; P63260	0	3199.61	1067.21			8.41324e-21	7.66	[R].TTGIVMDSGDGVTHTVPIYEGYALPHAILR.[L]	Q8BFZ3 [149-178]; P60710 [148-177]; P63260 [148-177]	3.41297e+08	38.87
	DLTDYLMK		4	7	6	Q8BFZ3; P60710; P68033; P63260	0	998.486	499.747			0.009442	1.65	[R].DLTDYLMK.[I]	Q8BFZ3 [185-192]; P60710 [184-191]; P68033 [186-193]; P63260 [184-191]	2.74753e+08	35.3
	DLTDYLMK	1xOxidation [M7]	4	7	21	Q8BFZ3; P60710; P68033; P63260	0	1014.48	507.744			0.0174	1.12	[R].DLTDYLMK.[I]	Q8BFZ3 [185-192]; P60710 [184-191]; P68033 [186-193]; P63260 [184-191]	7.20279e+08	30.5
	HQGVMVGMGQK		4	7	6	Q8BFZ3; P60710; P68033; P63260	0	1171.57	586.287			2.952e-09	3.64	[R].HQGVMVGMGQK.[D]	Q8BFZ3 [41-51]; P60710 [40-50]; P68033 [42-52]; P63260 [40-50]	170095124	17.14
	HQGVMVGMGQK	1xOxidation [M]	4	7	30	Q8BFZ3; P60710; P68033; P63260	0	1187.57	594.286			9.136e-09	3.45	[R].HQGVMVGMGQK.[D]	Q8BFZ3 [41-51]; P60710 [40-50]; P68033 [42-52]; P63260 [40-50]	2.24948e+08	14.4
	HQGVMVGMGQK	2xOxidation [M5; M8]	4	7	17	Q8BFZ3; P60710; P68033; P63260	0	1203.56	602.283			3.04e-07	2.16	[R].HQGVMVGMGQK.[D]	Q8BFZ3 [41-51]; P60710 [40-50]; P68033 [42-52]; P63260 [40-50]	5.84702e+07	9.48
	LDLAGRDLTDYLMK		4	7	2	Q8BFZ3; P60710; P68033; P63260	1	1623.84	541.951			0.0004826	1.93	[R].LDLAGRDLTDYLMK.[I]	Q8BFZ3 [179-192]; P60710 [178-191]; P68033 [180-193]; P63260 [178-191]	2.48174e+06	38.75
	LDLAGRDLTDYLMK	1xOxidation [M13]	4	7	2	Q8BFZ3; P60710; P68033; P63260	1	1639.84	820.425			5.902e-05	2.99	[R].LDLAGRDLTDYLMK.[I]	Q8BFZ3 [179-192]; P60710 [178-191]; P68033 [180-193]; P63260 [178-191]	1.65891e+07	35.71
	IKIIAPPER		4	7	2	Q8BFZ3; P60710; P68033; P63260	1	1036.65	346.221			0.002168	2.51	[K].IKIIAPPER.[K]	Q8BFZ3 [328-336]; P60710 [327-335]; P68033 [329-337]; P63260 [327-335]	71568298	22.7
	IKIIAPPERK		4	7	4	Q8BFZ3; P60710; P68033; P63260	2	1164.75	388.919			8.8e-08	2.56	[K].IKIIAPPERK.[Y]	Q8BFZ3 [328-337]; P60710 [327-336]; P68033 [329-338]; P63260 [327-336]	3.36945e+07	19.29
	IIAPPER		4	7	8	Q8BFZ3; P60710; P68033; P63260	0	795.472	398.239			0.05729	1.27	[K].IIAPPER.[K]	Q8BFZ3 [330-336]; P60710 [329-335]; P68033 [331-337]; P63260 [329-335]	622892732	18.57
	IIAPPERK		4	7	2	Q8BFZ3; P60710; P68033; P63260	1	923.567	308.527			0.0001121	2.32	[K].IIAPPERK.[Y]	Q8BFZ3 [330-337]; P60710 [329-336]; P68033 [331-338]; P63260 [329-336]	228626944	14.98
	SYELPDGQVITIGNER		4	7	21	Q8BFZ3; P60710; P68033; P63260	0	1790.89	895.947			7.243e-09	3.39	[RK].SYELPDGQVITIGNER.[F]	Q8BFZ3 [240-255]; P60710 [239-254]; P68033 [241-256]; P63260 [239-254]	6.18315e+08	36.43
	YSVWIGGSILASLSTFQQMWISK	1xOxidation [M19]	4	5	1	Q8BFZ3; P60710; P68033; P63260	0	2618.33	873.448			0.02127	1.07	[K].YSVWIGGSILASLSTFQQMWISK.[Q]	Q8BFZ3 [338-360]; P60710 [337-359]; P68033 [339-361]; P63260 [337-359]	90499.6	53.48
P63260	Actin, cytoplasmic 2 OS=Mus musculus OX=10090 GN=Actg1 PE=1 SV=1	600.11	94	41	469	1	375	41.8	5.48
	Sequence	Modifications	# Protein Groups	# Proteins	# PSMs	Master Protein Accessions	# Missed Cleavages	Theo. MH+ [Da]	m/z [Da] (by Search Engine): Sequest HT			Percolator PEP (by Search Engine): Sequest HT	XCorr (by Search Engine): Sequest HT	Annotated Sequence	Positions in Master Proteins	Abundance: F5: Sample	Top Apex RT [min]
	CPEALFQPSFLGMESCGIHETTFNSIMK	2xCarbamidomethyl [C1; C16]; 2xOxidation [M13; M27]	2	2	1	P60710; P63260	0	3263.45	1088.49			0.0009692	2.1	[R].CPEALFQPSFLGMESCGIHETTFNSIMK.[C]	P60710 [257-284]; P63260 [257-284]	525429	40.58
	DLYANTVLSGGTTMYPGIADR		2	2	7	P60710; P63260	0	2215.07	1108.04			4.809e-09	3.31	[K].DLYANTVLSGGTTMYPGIADR.[M]	P60710 [292-312]; P63260 [292-312]	3.83304e+07	39.9
	DLYANTVLSGGTTMYPGIADR	1xOxidation [M14]	2	2	19	P60710; P63260	0	2231.06	1116.04			1.467e-13	4.95	[K].DLYANTVLSGGTTMYPGIADR.[M]	P60710 [292-312]; P63260 [292-312]	2.23198e+08	36.93
	DLYANTVLSGGTTMYPGIADRMQK	2xOxidation [M14; M22]	2	2	1	P60710; P63260	1	2634.25	878.754			0.02472	0.96	[K].DLYANTVLSGGTTMYPGIADRMQK.[E]	P60710 [292-315]; P63260 [292-315]
	EKLCYVALDFEQEMATAASSSSLEK	1xCarbamidomethyl [C4]; 1xOxidation [M14]	2	2	2	P60710; P63260	1	2823.31	941.777			1.163e-09	4.09	[K].EKLCYVALDFEQEMATAASSSSLEK.[S]	P60710 [214-238]; P63260 [214-238]	1.72688e+06	36.4
	EKMTQIMFETFNTPAMYVAIQAVLSLYASGR	3xOxidation [M3; M7; M16]	2	2	1	P60710; P63260	1	3558.73	1186.91			0.0002551	1.42	[R].EKMTQIMFETFNTPAMYVAIQAVLSLYASGR.[T]	P60710 [117-147]; P63260 [117-147]	234018	51.86
	FRCPEALFQPSFLGMESCGIHETTFNSIMK	2xCarbamidomethyl [C3; C18]; 2xOxidation [M15; M29]	2	2	1	P60710; P63260	1	3566.62	892.401			0.01118	1.87	[R].FRCPEALFQPSFLGMESCGIHETTFNSIMK.[C]	P60710 [255-284]; P63260 [255-284]
	GYSFTTTAER		2	2	40	P60710; P63260	0	1132.53	566.766			0.0009757	2.27	[R].GYSFTTTAER.[E]	P60710 [197-206]; P63260 [197-206]	1.14659e+09	22.05
	GYSFTTTAEREIVR		2	2	2	P60710; P63260	1	1629.82	815.413			2.714e-05	3.12	[R].GYSFTTTAEREIVR.[D]	P60710 [197-210]; P63260 [197-210]	7.76513e+06	28.77
	KDLYANTVLSGGTTMYPGIADR		2	2	1	P60710; P63260	1	2343.16	1172.09			2.273e-16	4.49	[R].KDLYANTVLSGGTTMYPGIADR.[M]	P60710 [291-312]; P63260 [291-312]	951328	34.82
	KDLYANTVLSGGTTMYPGIADR	1xOxidation [M15]	2	2	6	P60710; P63260	1	2359.16	1180.09			1.063e-16	5.6	[R].KDLYANTVLSGGTTMYPGIADR.[M]	P60710 [291-312]; P63260 [291-312]	4.43219e+07	32.19
	LCYVALDFEQEMATAASSSSLEK	1xCarbamidomethyl [C2]	2	2	2	P60710; P63260	0	2550.17	850.728			0.001087	1.61	[K].LCYVALDFEQEMATAASSSSLEK.[S]	P60710 [216-238]; P63260 [216-238]	4183473	45.67
	LCYVALDFEQEMATAASSSSLEK	1xCarbamidomethyl [C2]; 1xOxidation [M12]	2	2	7	P60710; P63260	0	2566.17	1283.59			3.541e-10	3.14	[K].LCYVALDFEQEMATAASSSSLEK.[S]	P60710 [216-238]; P63260 [216-238]	1.43093e+07	38.26
	ILTERGYSFTTTAER		2	2	1	P60710; P63260	1	1744.89	582.296			5.705e-06	3.71	[K].ILTERGYSFTTTAER.[E]	P60710 [192-206]; P63260 [192-206]	1075158	25.96
	MTQIMFETFNTPAMYVAIQAVLSLYASGR	3xOxidation [M1; M5; M14]	2	2	2	P60710; P63260	0	3301.59	826.15			1.39e-05	2.12	[K].MTQIMFETFNTPAMYVAIQAVLSLYASGR.[T]	P60710 [119-147]; P63260 [119-147]	1.6428e+06	52.95
	QEYDESGPSIVHR		2	2	8	P60710; P63260	0	1516.7	506.239			2.306e-08	3.18	[K].QEYDESGPSIVHR.[K]	P60710 [360-372]; P63260 [360-372]	2.6472e+08	20.22
	QEYDESGPSIVHRK		2	2	2	P60710; P63260	1	1644.8	548.935			1.362e-08	4.47	[K].QEYDESGPSIVHRK.[C]	P60710 [360-373]; P63260 [360-373]	10638810	17.33
	VAPEEHPVLLTEAPLNPK		2	2	45	P60710; P63260	0	1954.06	977.535			5.493e-14	5.98	[R].VAPEEHPVLLTEAPLNPK.[A]	P60710 [96-113]; P63260 [96-113]	1.6146e+09	31.47
	VAPEEHPVLLTEAPLNPKANR		2	2	1	P60710; P63260	1	2295.25	765.752			9.421e-10	3.69	[R].VAPEEHPVLLTEAPLNPKANR.[E]	P60710 [96-116]; P63260 [96-116]	587469	34.67
	VAPEEHPVLLTEAPLNPKANREK		2	2	1	P60710; P63260	2	2552.38	638.85			0.003291	2	[R].VAPEEHPVLLTEAPLNPKANREK.[M]	P60710 [96-118]; P63260 [96-118]
	AGFAGDDAPR		3	6	45	P60710; P68033; P63260	0	976.448	488.727			5.632e-05	2.41	[K].AGFAGDDAPR.[A]	P60710 [19-28]; P68033 [21-30]; P63260 [19-28]	1.21638e+09	16.98
	AGFAGDDAPRAVFPSIVGRPR		3	6	3	P60710; P68033; P63260	1	2156.14	719.383			5.774e-06	2.12	[K].AGFAGDDAPRAVFPSIVGRPR.[H]	P60710 [19-39]; P68033 [21-41]; P63260 [19-39]	3711233	33.01
	AVFPSIVGRPR		3	6	35	P60710; P68033; P63260	0	1198.71	400.238			2.152e-05	2.12	[R].AVFPSIVGRPR.[H]	P60710 [29-39]; P68033 [31-41]; P63260 [29-39]	1.25267e+09	28.02
	DSYVGDEAQSK		3	6	7	P60710; P68033; P63260	0	1198.52	599.762			4.102e-05	2.08	[K].DSYVGDEAQSK.[R]	P60710 [51-61]; P68033 [53-63]; P63260 [51-61]	2.2295e+08	14.76
	DSYVGDEAQSKR		3	6	12	P60710; P68033; P63260	1	1354.62	452.21			6.572e-07	2.61	[K].DSYVGDEAQSKR.[G]	P60710 [51-62]; P68033 [53-64]; P63260 [51-62]	2.89175e+08	13.74
	EITALAPSTMK		3	6	15	P60710; P68033; P63260	0	1161.62	581.313			9.24e-05	2.73	[K].EITALAPSTMK.[I]	P60710 [316-326]; P68033 [318-328]; P63260 [316-326]	5.99506e+08	26.39
	EITALAPSTMK	1xOxidation [M10]	3	6	17	P60710; P68033; P63260	0	1177.61	589.308			4.678e-05	2.52	[K].EITALAPSTMK.[I]	P60710 [316-326]; P68033 [318-328]; P63260 [316-326]	6.60668e+08	22.22
	EITALAPSTMKIK		3	6	2	P60710; P68033; P63260	1	1402.8	701.902			9.912e-05	1.98	[K].EITALAPSTMKIK.[I]	P60710 [316-328]; P68033 [318-330]; P63260 [316-328]
	EITALAPSTMKIK	1xOxidation [M10]	3	6	2	P60710; P68033; P63260	1	1418.79	709.898			0.000461	2.71	[K].EITALAPSTMKIK.[I]	P60710 [316-328]; P68033 [318-330]; P63260 [316-328]	1.06086e+06	23.42
	EIVRDIKEK		3	6	1	P60710; P68033; P63260	2	1129.66	565.332			0.001298	1.98	[R].EIVRDIKEK.[L]	P60710 [207-215]; P68033 [209-217]; P63260 [207-215]	1.36805e+06	20.01
	HQGVMVGMGQKDSYVGDEAQSK	1xOxidation [M]	3	6	5	P60710; P68033; P63260	1	2367.07	789.695			0.0002058	2.38	[R].HQGVMVGMGQKDSYVGDEAQSK.[R]	P60710 [40-61]; P68033 [42-63]; P63260 [40-61]	312557	20.37
	HQGVMVGMGQKDSYVGDEAQSK	2xOxidation [M5; M8]	3	6	1	P60710; P68033; P63260	1	2383.07	596.52			6.558e-05	2.4	[R].HQGVMVGMGQKDSYVGDEAQSK.[R]	P60710 [40-61]; P68033 [42-63]; P63260 [40-61]
	HQGVMVGMGQKDSYVGDEAQSKR		3	6	1	P60710; P68033; P63260	2	2507.18	627.548			3.253e-08	1.98	[R].HQGVMVGMGQKDSYVGDEAQSKR.[G]	P60710 [40-62]; P68033 [42-64]; P63260 [40-62]
	HQGVMVGMGQKDSYVGDEAQSKR	2xOxidation [M5; M8]	3	6	2	P60710; P68033; P63260	2	2539.17	635.544			1.673e-12	3.72	[R].HQGVMVGMGQKDSYVGDEAQSKR.[G]	P60710 [40-62]; P68033 [42-64]; P63260 [40-62]	711664	16.4
	IWHHTFYNELR		3	4	6	P60710; P68033; P63260	0	1515.75	505.92			6.992e-05	3.08	[K].IWHHTFYNELR.[V]	P60710 [85-95]; P68033 [87-97]; P63260 [85-95]	5.25034e+07	25.4
	MQKEITALAPSTMK	2xOxidation [M1; M13]	3	6	3	P60710; P68033; P63260	1	1580.8	527.605			0.0004273	1.8	[R].MQKEITALAPSTMK.[I]	P60710 [313-326]; P68033 [315-328]; P63260 [313-326]	828931	20.22
	MEEEIAALVIDNGSGMCK	1xCarbamidomethyl [C17]; 1xMet-loss+Acetyl [N-Term]	1	1	3	P63260	0	1877.86	939.433			1.037e-10	2.83	[-].MEEEIAALVIDNGSGMCK.[A]	P63260 [1-18]	2646994	47.02
	MEEEIAALVIDNGSGMCK	1xCarbamidomethyl [C17]; 1xOxidation [M16]; 1xMet-loss+Acetyl [N-Term]	1	1	5	P63260	0	1893.86	947.43			4.504e-11	4.08	[-].MEEEIAALVIDNGSGMCK.[A]	P63260 [1-18]	10003622	44.53
	CDVDIRK	1xCarbamidomethyl [C1]	3	3	1	Q8BFZ3; P60710; P63260	1	905.451	302.488			0.0009742	2.2	[K].CDVDIRK.[D]	Q8BFZ3 [286-292]; P60710 [285-291]; P63260 [285-291]	3.2306e+06	12.4
	TTGIVMDSGDGVTHTVPIYEGYALPHAILR		3	3	9	Q8BFZ3; P60710; P63260	0	3183.61	1061.87			3.942e-13	3.97	[R].TTGIVMDSGDGVTHTVPIYEGYALPHAILR.[L]	Q8BFZ3 [149-178]; P60710 [148-177]; P63260 [148-177]	6.88742e+07	40.52
	TTGIVMDSGDGVTHTVPIYEGYALPHAILR	1xOxidation [M6]	3	3	22	Q8BFZ3; P60710; P63260	0	3199.61	1067.21			8.41324e-21	7.66	[R].TTGIVMDSGDGVTHTVPIYEGYALPHAILR.[L]	Q8BFZ3 [149-178]; P60710 [148-177]; P63260 [148-177]	3.41297e+08	38.87
	DLTDYLMK		4	7	6	Q8BFZ3; P60710; P68033; P63260	0	998.486	499.747			0.009442	1.65	[R].DLTDYLMK.[I]	Q8BFZ3 [185-192]; P60710 [184-191]; P68033 [186-193]; P63260 [184-191]	2.74753e+08	35.3
	DLTDYLMK	1xOxidation [M7]	4	7	21	Q8BFZ3; P60710; P68033; P63260	0	1014.48	507.744			0.0174	1.12	[R].DLTDYLMK.[I]	Q8BFZ3 [185-192]; P60710 [184-191]; P68033 [186-193]; P63260 [184-191]	7.20279e+08	30.5
	HQGVMVGMGQK		4	7	6	Q8BFZ3; P60710; P68033; P63260	0	1171.57	586.287			2.952e-09	3.64	[R].HQGVMVGMGQK.[D]	Q8BFZ3 [41-51]; P60710 [40-50]; P68033 [42-52]; P63260 [40-50]	170095124	17.14
	HQGVMVGMGQK	1xOxidation [M]	4	7	30	Q8BFZ3; P60710; P68033; P63260	0	1187.57	594.286			9.136e-09	3.45	[R].HQGVMVGMGQK.[D]	Q8BFZ3 [41-51]; P60710 [40-50]; P68033 [42-52]; P63260 [40-50]	2.24948e+08	14.4
	HQGVMVGMGQK	2xOxidation [M5; M8]	4	7	17	Q8BFZ3; P60710; P68033; P63260	0	1203.56	602.283			3.04e-07	2.16	[R].HQGVMVGMGQK.[D]	Q8BFZ3 [41-51]; P60710 [40-50]; P68033 [42-52]; P63260 [40-50]	5.84702e+07	9.48
	LDLAGRDLTDYLMK		4	7	2	Q8BFZ3; P60710; P68033; P63260	1	1623.84	541.951			0.0004826	1.93	[R].LDLAGRDLTDYLMK.[I]	Q8BFZ3 [179-192]; P60710 [178-191]; P68033 [180-193]; P63260 [178-191]	2.48174e+06	38.75
	LDLAGRDLTDYLMK	1xOxidation [M13]	4	7	2	Q8BFZ3; P60710; P68033; P63260	1	1639.84	820.425			5.902e-05	2.99	[R].LDLAGRDLTDYLMK.[I]	Q8BFZ3 [179-192]; P60710 [178-191]; P68033 [180-193]; P63260 [178-191]	1.65891e+07	35.71
	IKIIAPPER		4	7	2	Q8BFZ3; P60710; P68033; P63260	1	1036.65	346.221			0.002168	2.51	[K].IKIIAPPER.[K]	Q8BFZ3 [328-336]; P60710 [327-335]; P68033 [329-337]; P63260 [327-335]	71568298	22.7
	IKIIAPPERK		4	7	4	Q8BFZ3; P60710; P68033; P63260	2	1164.75	388.919			8.8e-08	2.56	[K].IKIIAPPERK.[Y]	Q8BFZ3 [328-337]; P60710 [327-336]; P68033 [329-338]; P63260 [327-336]	3.36945e+07	19.29
	IIAPPER		4	7	8	Q8BFZ3; P60710; P68033; P63260	0	795.472	398.239			0.05729	1.27	[K].IIAPPER.[K]	Q8BFZ3 [330-336]; P60710 [329-335]; P68033 [331-337]; P63260 [329-335]	622892732	18.57
	IIAPPERK		4	7	2	Q8BFZ3; P60710; P68033; P63260	1	923.567	308.527			0.0001121	2.32	[K].IIAPPERK.[Y]	Q8BFZ3 [330-337]; P60710 [329-336]; P68033 [331-338]; P63260 [329-336]	228626944	14.98
	SYELPDGQVITIGNER		4	7	21	Q8BFZ3; P60710; P68033; P63260	0	1790.89	895.947			7.243e-09	3.39	[RK].SYELPDGQVITIGNER.[F]	Q8BFZ3 [240-255]; P60710 [239-254]; P68033 [241-256]; P63260 [239-254]	6.18315e+08	36.43
	YSVWIGGSILASLSTFQQMWISK	1xOxidation [M19]	4	5	1	Q8BFZ3; P60710; P68033; P63260	0	2618.33	873.448			0.02127	1.07	[K].YSVWIGGSILASLSTFQQMWISK.[Q]	Q8BFZ3 [338-360]; P60710 [337-359]; P68033 [339-361]; P63260 [337-359]	90499.6	53.48
P11679	Keratin, type II cytoskeletal 8 OS=Mus musculus OX=10090 GN=Krt8 PE=1 SV=4	419.32	89	61	195	50	490	54.5	5.82
	Sequence	Modifications	# Protein Groups	# Proteins	# PSMs	Master Protein Accessions	# Missed Cleavages	Theo. MH+ [Da]	m/z [Da] (by Search Engine): Sequest HT			Percolator PEP (by Search Engine): Sequest HT	XCorr (by Search Engine): Sequest HT	Annotated Sequence	Positions in Master Proteins	Abundance: F5: Sample	Top Apex RT [min]
	AEAETMYQIK		1	1	1	P11679	0	1183.57	592.286			0.001649	2.06	[R].AEAETMYQIK.[Y]	P11679 [282-291]	19744606	22.99
	AEAETMYQIK	1xOxidation [M6]	1	1	2	P11679	0	1199.56	600.284			0.0003378	2.08	[R].AEAETMYQIK.[Y]	P11679 [282-291]	9615887	18.75
	AEAETMYQIKYEELQTLAGK	1xOxidation [M6]	1	1	1	P11679	1	2332.14	778.052			0.03982	1.16	[R].AEAETMYQIKYEELQTLAGK.[H]	P11679 [282-301]	6.06911e+06	33.34
	ASLEAAIADAEQR		1	1	5	P11679	0	1344.68	672.841			3.44e-08	3.76	[R].ASLEAAIADAEQR.[G]	P11679 [335-347]	67286997	31.36
	ASLEAAIADAEQRGEMAIK		1	1	2	P11679	1	1974	658.668			9.129e-12	3.29	[R].ASLEAAIADAEQRGEMAIK.[D]	P11679 [335-353]	4.91075e+06	38.92
	ASLEAAIADAEQRGEMAIK	1xOxidation [M16]	1	1	4	P11679	1	1989.99	995.504			2.92e-11	4.28	[R].ASLEAAIADAEQRGEMAIK.[D]	P11679 [335-353]	9.5138e+06	38
	ASLEAAIADAEQRGEMAIKDAQTK	1xOxidation [M16]	1	1	4	P11679	2	2533.26	845.087			5.915e-07	3.49	[R].ASLEAAIADAEQRGEMAIKDAQTK.[L]	P11679 [335-358]	3626742	41.51
	DGKLVSESSDVVSK		1	1	3	P11679	1	1449.74	725.374			1.093e-08	3.39	[R].DGKLVSESSDVVSK.[-]	P11679 [477-490]	5.77623e+06	19.54
	DVDEAYMNK		1	1	1	P11679	0	1084.46	542.734			0.006934	1.7	[K].DVDEAYMNK.[V]	P11679 [205-213]	7.20042e+06	18.86
	DVDEAYMNK	1xOxidation [M7]	1	1	2	P11679	0	1100.46	550.731			0.001084	1.63	[K].DVDEAYMNK.[V]	P11679 [205-213]	3.10329e+06	14.54
	DVDEAYMNKVELESR		1	1	2	P11679	1	1797.83	899.417			2.281e-10	4.68	[K].DVDEAYMNKVELESR.[L]	P11679 [205-219]	26612269	28.25
	DVDEAYMNKVELESR	1xOxidation [M7]	1	1	4	P11679	1	1813.83	907.417			9.938e-10	4.23	[K].DVDEAYMNKVELESR.[L]	P11679 [205-219]	2.0232e+07	23.98
	ELQSQISDTSVVLSMDNSR		1	1	2	P11679	0	2109.01	1055.01			4.337e-11	3.93	[R].ELQSQISDTSVVLSMDNSR.[S]	P11679 [240-258]	4.38125e+06	34.56
	ELQSQISDTSVVLSMDNSR	1xOxidation [M15]	1	1	3	P11679	0	2125.01	1063.01			1.489e-11	4.38	[R].ELQSQISDTSVVLSMDNSR.[S]	P11679 [240-258]	1.12548e+07	30.36
	GEMAIKDAQTK		1	1	2	P11679	1	1191.6	596.305			6.134e-07	3.3	[R].GEMAIKDAQTK.[L]	P11679 [348-358]	2.40136e+06	13.96
	GEMAIKDAQTK	1xOxidation [M3]	1	1	1	P11679	1	1207.6	604.305			0.0758	1.41	[R].GEMAIKDAQTK.[L]	P11679 [348-358]	863008	9.5
	GSMGTGVGLGGFGGAGVGGITAVTVNQSLLSPLK		1	1	1	P11679	0	3059.62	1020.55			0.002502	0.65	[R].GSMGTGVGLGGFGGAGVGGITAVTVNQSLLSPLK.[L]	P11679 [50-83]	973822	48.65
	GSMGTGVGLGGFGGAGVGGITAVTVNQSLLSPLKLEVDPNIQAVR		1	1	1	P11679	1	4294.29	1074.33			0.01325	0.97	[R].GSMGTGVGLGGFGGAGVGGITAVTVNQSLLSPLKLEVDPNIQAVR.[T]	P11679 [50-94]	1.05803e+06	50.61
	HGDDLRR		1	1	1	P11679	1	868.438	434.722			0.07579	1.4	[K].HGDDLRR.[T]	P11679 [302-308]	4921800	5.03
	KDVDEAYMNKVELESR		1	1	2	P11679	2	1925.93	642.645			2.567e-10	4.19	[K].KDVDEAYMNKVELESR.[L]	P11679 [204-219]	995749	24.5
	KDVDEAYMNKVELESR	1xOxidation [M8]	1	1	2	P11679	2	1941.92	647.977			2.284e-08	4.04	[K].KDVDEAYMNKVELESR.[L]	P11679 [204-219]	914007	20.74
	KLLEGEESRLESGMQNMSIHTK		1	1	2	P11679	2	2517.24	630.068			7.771e-05	2.81	[R].KLLEGEESRLESGMQNMSIHTK.[T]	P11679 [399-420]	615195	29.65
	KLLEGEESRLESGMQNMSIHTK	1xOxidation [M]	1	1	2	P11679	2	2533.24	634.063			0.004288	1.89	[R].KLLEGEESRLESGMQNMSIHTK.[T]	P11679 [399-420]	1.54186e+06	24.47
	KLLEGEESRLESGMQNMSIHTK	2xOxidation [M14; M17]	1	1	2	P11679	2	2549.23	850.411			5.678e-05	2.13	[R].KLLEGEESRLESGMQNMSIHTK.[T]	P11679 [399-420]	3.39935e+06	21.53
	LAELEAALQR		1	1	6	P11679	0	1113.63	557.316			5.31e-05	3.02	[K].LAELEAALQR.[A]	P11679 [359-368]	1.57016e+08	29.31
	LALDIEITTYR		1	1	1	P11679	0	1307.72	654.362			0.03066	1.35	[K].LALDIEITTYR.[K]	P11679 [388-398]	159550	38.02
	LEAELGNMQGLVEDFK		1	1	1	P11679	0	1792.88	896.947			3.084e-08	2.98	[K].LEAELGNMQGLVEDFK.[N]	P11679 [167-182]	556954	42.22
	LEAELGNMQGLVEDFK	1xOxidation [M8]	1	1	1	P11679	0	1808.87	904.942			3.909e-09	3.3	[K].LEAELGNMQGLVEDFK.[N]	P11679 [167-182]	1.10287e+06	34.59
	LEGLTDEINFLR		1	1	8	P11679	0	1419.75	710.376			5.032e-07	3.22	[R].LEGLTDEINFLR.[Q]	P11679 [220-231]	9.82451e+07	40.99
	LESGMQNMSIHTK		1	1	2	P11679	0	1475.7	738.353			4.935e-07	3.51	[R].LESGMQNMSIHTK.[T]	P11679 [408-420]	12820661	21.21
	LESGMQNMSIHTK	1xOxidation [M]	1	1	4	P11679	0	1491.69	746.348			6.77e-06	3.02	[R].LESGMQNMSIHTK.[T]	P11679 [408-420]	1.88304e+07	16.62
	LESGMQNMSIHTK	2xOxidation [M5; M8]	1	1	1	P11679	0	1507.69	503.233			0.0003754	2.04	[R].LESGMQNMSIHTK.[T]	P11679 [408-420]	6012278	12.17
	LEVDPNIQAVR		1	1	1	P11679	0	1253.68	627.346			0.0002522	2.67	[K].LEVDPNIQAVR.[T]	P11679 [84-94]	40440808	28.32
	LKLEAELGNMQGLVEDFK	1xOxidation [M10]	1	1	4	P11679	1	2050.05	684.024			6.45e-07	2.62	[K].LKLEAELGNMQGLVEDFK.[N]	P11679 [165-182]	1.53749e+06	35.93
	LLEGEESRLESGMQNMSIHTK		1	1	2	P11679	1	2389.15	797.057			2.156e-07	2.21	[K].LLEGEESRLESGMQNMSIHTK.[T]	P11679 [400-420]	3.2149e+06	31.3
	LLEGEESRLESGMQNMSIHTK	1xOxidation [M]	1	1	4	P11679	1	2405.14	802.381			9.141e-07	2.64	[K].LLEGEESRLESGMQNMSIHTK.[T]	P11679 [400-420]	6.85465e+06	27.03
	LLEGEESRLESGMQNMSIHTK	2xOxidation [M13; M16]	1	1	1	P11679	1	2421.14	807.715			6.644e-06	2.58	[K].LLEGEESRLESGMQNMSIHTK.[T]	P11679 [400-420]	4548928	22.67
	LQAEIEALK		1	1	1	P11679	0	1014.58	507.794			0.001397	2.21	[R].LQAEIEALK.[G]	P11679 [323-331]	80739200	26.5
	LQAEIEALKGQR		1	1	2	P11679	1	1355.76	452.591			3.051e-08	4.02	[R].LQAEIEALKGQR.[A]	P11679 [323-334]	79236926	23.76
	ISSSSFSR		1	1	1	P11679	0	870.432	435.718			0.0458	2.18	[R].ISSSSFSR.[V]	P11679 [33-40]	35703992	16.32
	LVSESSDVVSK		1	1	1	P11679	0	1149.6	575.302			0.0001166	2.53	[K].LVSESSDVVSK.[-]	P11679 [480-490]	80936776	17.74
	QLEALGQEK		1	1	2	P11679	0	1015.54	508.273			0.0005095	2.54	[R].QLEALGQEK.[L]	P11679 [156-164]	35700880	18.77
	QIHEEEIR		1	1	3	P11679	0	1053.53	527.268			0.003725	1.77	[R].QIHEEEIR.[E]	P11679 [232-239]	16917722	13.79
	QIHEEEIRELQSQISDTSVVLSMDNSR	1xOxidation [M23]	1	1	1	P11679	1	3159.52	790.635			9.945e-12	4.2	[R].QIHEEEIRELQSQISDTSVVLSMDNSR.[S]	P11679 [232-258]	3858446	36.76
	QLREYQELMNVK		1	2	1	P11679	1	1550.8	517.603			0.02463	1.44	[R].QLREYQELMNVK.[L]	P11679 [376-387]
	RQLEALGQEK		1	1	2	P11679	1	1171.64	586.324			8.066e-05	2.93	[R].RQLEALGQEK.[L]	P11679 [155-164]	6.17479e+06	16.01
	RTEMENEFVLIKK		1	1	1	P11679	2	1636.87	546.296			0.0002964	3.25	[K].RTEMENEFVLIKK.[D]	P11679 [192-204]	960114	27.04
	RTEMENEFVLIKK	1xOxidation [M4]	1	1	1	P11679	2	1652.87	551.627			5.635e-05	2.63	[K].RTEMENEFVLIKK.[D]	P11679 [192-204]	1.13788e+06	23.4
	SFTSGPGAR		1	1	1	P11679	0	879.432	440.219			0.0517	1.76	[R].SFTSGPGAR.[I]	P11679 [24-32]	18276722	14.39
	SLDMDGIIAEVR		1	1	9	P11679	0	1318.67	659.835			3.623e-06	2.43	[R].SLDMDGIIAEVR.[A]	P11679 [259-270]	4.386e+07	38.94
	SLDMDGIIAEVR	1xOxidation [M4]	1	1	7	P11679	0	1334.66	667.835			2.934e-06	2.5	[R].SLDMDGIIAEVR.[A]	P11679 [259-270]	5.12623e+07	31.12
	SLNNKFASFIDK		1	1	1	P11679	1	1383.73	692.369			0.009329	1.76	[K].SLNNKFASFIDK.[V]	P11679 [103-114]
	SNMDNMFESYINNLR		1	1	1	P11679	0	1847.81	924.407			1.166e-07	2.76	[R].SNMDNMFESYINNLR.[R]	P11679 [140-154]	287561	43.84
	SNMDNMFESYINNLR	1xOxidation [M]	1	1	2	P11679	0	1863.8	932.395			5.634e-08	3.11	[R].SNMDNMFESYINNLR.[R]	P11679 [140-154]	2.37333e+06	38.89
	SNMDNMFESYINNLR	2xOxidation [M3; M6]	1	1	2	P11679	0	1879.79	940.4			6.849e-07	3.93	[R].SNMDNMFESYINNLR.[R]	P11679 [140-154]	6.05741e+06	36.25
	SNMDNMFESYINNLRR		1	1	1	P11679	1	2003.91	668.64			0.0003564	2.63	[R].SNMDNMFESYINNLRR.[Q]	P11679 [140-155]	709734	40.78
	SNMDNMFESYINNLRR	1xOxidation [M]	1	1	2	P11679	1	2019.9	673.972			0.0004283	2.62	[R].SNMDNMFESYINNLRR.[Q]	P11679 [140-155]	8.07834e+06	36.34
	SNMDNMFESYINNLRR	2xOxidation [M3; M6]	1	1	3	P11679	1	2035.9	679.304			0.0008857	3.06	[R].SNMDNMFESYINNLRR.[Q]	P11679 [140-155]	1.7152e+07	33.62
	SRAEAETMYQIK		1	1	3	P11679	1	1426.7	713.851			5.359e-07	3.04	[R].SRAEAETMYQIK.[Y]	P11679 [280-291]	22144650	20.56
	SRAEAETMYQIK	1xOxidation [M8]	1	1	3	P11679	1	1442.69	721.85			1.193e-05	2.66	[R].SRAEAETMYQIK.[Y]	P11679 [280-291]	17356318	16.97
	SRAEAETMYQIKYEELQTLAGK		1	1	1	P11679	2	2559.28	640.573			7.704e-10	4.14	[R].SRAEAETMYQIKYEELQTLAGK.[H]	P11679 [280-301]	857822	33.83
	SRAEAETMYQIKYEELQTLAGK	1xOxidation [M8]	1	1	2	P11679	2	2575.27	859.09			4.244e-13	5.21	[R].SRAEAETMYQIKYEELQTLAGK.[H]	P11679 [280-301]	5.89203e+06	31.28
	TEISEMNR		1	1	1	P11679	0	979.451	490.228			0.02572	2.23	[K].TEISEMNR.[N]	P11679 [311-318]	6.63523e+06	16.19
	TEMENEFVLIK		1	1	2	P11679	0	1352.68	676.841			0.0001105	3.19	[R].TEMENEFVLIK.[K]	P11679 [193-203]	12186699	35.2
	TEMENEFVLIK	1xOxidation [M3]	1	1	1	P11679	0	1368.67	684.84			8.108e-05	2.77	[R].TEMENEFVLIK.[K]	P11679 [193-203]	22240620	31.84
	TEMENEFVLIKK		1	1	2	P11679	1	1480.77	740.889			4.926e-07	3.97	[R].TEMENEFVLIKK.[D]	P11679 [193-204]	30260265	29.95
	TEMENEFVLIKK	1xOxidation [M3]	1	1	2	P11679	1	1496.77	748.884			8.534e-06	3.38	[R].TEMENEFVLIKK.[D]	P11679 [193-204]	63458134	26.38
	TKTEISEMNR		1	1	3	P11679	1	1208.59	604.8			0.001517	2.13	[R].TKTEISEMNR.[N]	P11679 [309-318]	24052395	14.52
	TKTEISEMNR	1xOxidation [M8]	1	1	3	P11679	1	1224.59	612.797			0.001103	2.29	[R].TKTEISEMNR.[N]	P11679 [309-318]	8.01034e+06	9.42
	TQEKEQIK		1	1	3	P11679	1	1003.54	502.274			0.00169	2.64	[R].TQEKEQIK.[S]	P11679 [95-102]	1.55357e+07	5.6
	TTSGYSGGLSSSYGGLTSPGFSYGMSSFQPGFGSAGGSNTFSR	1xOxidation [M25]	1	1	1	P11679	0	4208.84	1052.97			1.11e-10	4.13	[K].TTSGYSGGLSSSYGGLTSPGFSYGMSSFQPGFGSAGGSNTFSR.[T]	P11679 [421-463]
	VELESRLEGLTDEINFLR		1	1	1	P11679	1	2133.12	711.701			0.07379	2.94	[K].VELESRLEGLTDEINFLR.[Q]	P11679 [214-231]
	VGSSSSSFR		1	1	3	P11679	0	913.437	457.222			0.0009911	2.01	[R].VGSSSSSFR.[G]	P11679 [41-49]	13353166	12.34
	WSLLQQQK		1	1	1	P11679	0	1030.57	515.787			0.00229	2.55	[K].WSLLQQQK.[T]	P11679 [129-136]	26023764	28.47
	YEELQTLAGK		1	1	2	P11679	0	1151.59	576.301			0.0002387	2.06	[K].YEELQTLAGK.[H]	P11679 [292-301]	124661856	25.05
	AQYEDIANR		2	3	3	P11679; Q922U2	0	1079.51	540.259			0.008451	2.13	[KR].AQYEDIANR.[S]	P11679 [271-279]; Q922U2 [338-346]	146834528	18.26
	KLLEGEESR		3	5	1	P11679; Q9DCV7; P20152	1	1060.56	530.785			8.471e-05	2.28	[R].KLLEGEESR.[IL]	P11679 [399-407]; Q9DCV7 [388-396]; P20152 [402-410]	7092150	13.64
	LLEGEESR		3	5	2	P11679; Q9DCV7; P20152	0	932.468	466.737			0.02175	2.01	[K].LLEGEESR.[IL]	P11679 [400-407]; Q9DCV7 [389-396]; P20152 [403-410]	25285894	14.92
	EYQELMNVK		3	6	1	P50446; P11679; Q3UV17	0	1153.56	577.278			0.0377	1.77	[KR].EYQELMNVK.[L]	P50446 [436-444]; P11679 [379-387]; Q3UV17 [451-459]	45832472	25.49
	EYQELMNVK	1xOxidation [M6]	3	6	3	P50446; P11679; Q3UV17	0	1169.55	585.279			0.01619	1.92	[KR].EYQELMNVK.[L]	P50446 [436-444]; P11679 [379-387]; Q3UV17 [451-459]	2.86093e+07	20.01
	FLEQQNK		7	16	2	P50446; Q8VED5; P11679; Q3UV17; Q9DCV7; Q922U2; P20152	0	906.468	453.737			0.06662	1.2	[R].FLEQQNK.[ALVMI]	P50446 [172-178]; Q8VED5 [159-165]; P11679 [117-123]; Q3UV17 [185-191]; Q9DCV7 [105-111]; Q922U2 [182-188]; P20152 [123-129]	59029636	13.94
	YEDEINK		6	9	1	Q3TTY5; P50446; P04104; Q8VED5; P11679; Q922U2	0	910.415	455.71			0.03627	1.38	[KR].YEDEINK.[R]	Q3TTY5 [289-295]; P50446 [242-248]; P04104 [278-284]; Q8VED5 [230-236]; P11679 [185-191]; Q922U2 [252-258]	501779	13.74
	YEDEINKR		6	9	2	Q3TTY5; P50446; P04104; Q8VED5; P11679; Q922U2	1	1066.52	533.76			0.005225	1.94	[KR].YEDEINKR.[TA]	Q3TTY5 [289-296]; P50446 [242-249]; P04104 [278-285]; Q8VED5 [230-237]; P11679 [185-192]; Q922U2 [252-259]	5.54387e+06	12.19
	FASFIDK		10	17	4	Q3TTY5; Q6NXH9; P50446; P04104; Q6IME9; Q8VED5; P11679; Q3UV17; Q9DCV7; Q922U2	0	827.43	414.217			0.01906	1.53	[K].FASFIDK.[V]	Q3TTY5 [210-216]; Q6NXH9 [142-148]; P50446 [163-169]; P04104 [199-205]; Q6IME9 [145-151]; Q8VED5 [150-156]; P11679 [108-114]; Q3UV17 [176-182]; Q9DCV7 [96-102]; Q922U2 [173-179]	1.3052e+08	26.32
	FASFIDKVR		10	17	4	Q3TTY5; Q6NXH9; P50446; P04104; Q6IME9; Q8VED5; P11679; Q3UV17; Q9DCV7; Q922U2	1	1082.6	361.537			6.572e-06	3.08	[K].FASFIDKVR.[F]	Q3TTY5 [210-218]; Q6NXH9 [142-150]; P50446 [163-171]; P04104 [199-207]; Q6IME9 [145-153]; Q8VED5 [150-158]; P11679 [108-116]; Q3UV17 [176-184]; Q9DCV7 [96-104]; Q922U2 [173-181]	112674668	27.38
	NKYEDEINK		3	4	1	Q8VED5; P11679; Q922U2	1	1152.55	576.778			0.000525	2.37	[K].NKYEDEINK.[R]	Q8VED5 [228-236]; P11679 [183-191]; Q922U2 [250-258]	1.62462e+06	14.71
	NKYEDEINKR		3	4	4	Q8VED5; P11679; Q922U2	2	1308.65	436.888			5.643e-07	3.65	[K].NKYEDEINKR.[T]	Q8VED5 [228-237]; P11679 [183-192]; Q922U2 [250-259]	8.32877e+07	14.81
Q9QXS1	Plectin OS=Mus musculus OX=10090 GN=Plec PE=1 SV=3	390.72	39	168	228	165	4691	533.9	5.96
	Sequence	Modifications	# Protein Groups	# Proteins	# PSMs	Master Protein Accessions	# Missed Cleavages	Theo. MH+ [Da]	m/z [Da] (by Search Engine): Sequest HT			Percolator PEP (by Search Engine): Sequest HT	XCorr (by Search Engine): Sequest HT	Annotated Sequence	Positions in Master Proteins	Abundance: F5: Sample	Top Apex RT [min]
	GFFDPNTHENLTYLQLLER		2	2	1	Q8R0W0; Q9QXS1	0	2307.14	769.718			9.675e-11	3.08	[K].GFFDPNTHENLTYLQLLER.[C]	Q8R0W0 [774-792]; [1735-1753]; Q9QXS1 [2996-3014]; [3655-3673]	842047	43.92
	LLEAQIATGGIIDPVHSHR		2	2	2	Q8R0W0; Q9QXS1	0	2027.1	676.374			1.51e-13	4.26	[R].LLEAQIATGGIIDPVHSHR.[V]	Q8R0W0 [1688-1706]; Q9QXS1 [2949-2967]	3.31816e+06	32.62
	ILSDPSDDTK		2	2	1	Q8R0W0; Q9QXS1	0	1090.53	545.766			4.473e-05	1.91	[R].ILSDPSDDTK.[G]	Q8R0W0 [1725-1734]; Q9QXS1 [2986-2995]	3007244	16.39
	AALAHSEIATTQAASTK		1	1	2	Q9QXS1	0	1670.87	557.627			2.018e-10	4.63	[R].AALAHSEIATTQAASTK.[A]	Q9QXS1 [2752-2768]	1.6866e+06	18.38
	AGLVGPELHEK		1	1	2	Q9QXS1	0	1149.63	383.88			1.588e-05	3.16	[R].AGLVGPELHEK.[L]	Q9QXS1 [3228-3238]	4.3006e+06	20.71
	AGTLSITEFADMLSGNAGGFR	1xOxidation [M12]	1	1	2	Q9QXS1	0	2131.01	1066.01			0.005151	1.13	[R].AGTLSITEFADMLSGNAGGFR.[S]	Q9QXS1 [4368-4388]	393796	45.04
	AGVGAPVTQVTLQSTQR		1	1	1	Q9QXS1	0	1712.93	856.966			9.912e-10	3.83	[K].AGVGAPVTQVTLQSTQR.[R]	Q9QXS1 [642-658]	1.41104e+06	27.75
	AGVVGPELHEK		1	1	3	Q9QXS1	0	1135.61	379.206			1.719e-05	3.13	[K].AGVVGPELHEK.[L]	Q9QXS1 [3559-3569]	3.95858e+06	17.97
	AHAFVVQQR		1	1	1	Q9QXS1	0	1055.57	352.529			0.06716	1.3	[K].AHAFVVQQR.[E]	Q9QXS1 [2198-2206]
	AKLEQLFQDEVAK		1	1	3	Q9QXS1	1	1518.82	759.909			1.657e-07	3.63	[K].AKLEQLFQDEVAK.[A]	Q9QXS1 [2659-2671]	1.36256e+06	31.54
	ALLEEIER		1	1	1	Q9QXS1	0	972.536	486.771			0.006846	1.9	[K].ALLEEIER.[H]	Q9QXS1 [1398-1405]	2.9107e+06	28.56
	ALQALDELR		1	1	1	Q9QXS1	0	1028.57	514.787			0.008193	2.25	[R].ALQALDELR.[L]	Q9QXS1 [1679-1687]	4.82667e+06	28.58
	AIVQLKPR		1	1	2	Q9QXS1	0	924.599	308.87			0.001786	1.91	[K].AIVQLKPR.[N]	Q9QXS1 [935-942]	3.79781e+06	19.25
	APVPASELLDAK		1	1	1	Q9QXS1	0	1210.67	605.837			6.718e-05	2.6	[R].APVPASELLDAK.[I]	Q9QXS1 [3454-3465]	6098949	29.86
	AQAEAQQPVFNTLR		1	1	1	Q9QXS1	0	1572.81	786.91			0.0003138	1.71	[R].AQAEAQQPVFNTLR.[D]	Q9QXS1 [1282-1295]
	AQAELEAQELQR		1	1	1	Q9QXS1	0	1385.7	693.355			5.935e-06	3.31	[K].AQAELEAQELQR.[R]	Q9QXS1 [1529-1540]
	AQAEVEGLGK		1	1	2	Q9QXS1	0	1001.53	501.266			0.001236	1.47	[K].AQAEVEGLGK.[G]	Q9QXS1 [1174-1183]	1.61033e+06	17.64
	AQFDQLKDGK		1	1	3	Q9QXS1	1	1149.59	575.297			0.0005331	2.28	[R].AQFDQLKDGK.[T]	Q9QXS1 [3470-3479]	81944687	17.74
	AQLEPVASPAK		1	1	1	Q9QXS1	0	1110.62	555.81			0.00032	2.57	[K].AQLEPVASPAK.[K]	Q9QXS1 [1436-1446]	2.24874e+06	19.88
	AQVEQELTTLR		1	1	1	Q9QXS1	0	1287.69	644.348			0.0001181	2.44	[K].AQVEQELTTLR.[L]	Q9QXS1 [2327-2337]	635366	27.42
	ARAEEAEAQKR		1	1	1	Q9QXS1	2	1258.65	420.221			0.01527	1.39	[R].ARAEEAEAQKR.[Q]	Q9QXS1 [1625-1635]	118399	5.45
	AREEAERELER		1	1	1	Q9QXS1	2	1387.69	463.236			0.0001348	1.59	[R].AREEAERELER.[W]	Q9QXS1 [1768-1778]
	ARNDESQLSPATR		1	1	2	Q9QXS1	1	1444.71	482.242			0.000888	1.71	[R].ARNDESQLSPATR.[G]	Q9QXS1 [720-732]	1.25089e+06	14.35
	ARQEEVYSELQAR		1	1	2	Q9QXS1	1	1578.79	526.932			0.000453	4.11	[R].ARQEEVYSELQAR.[E]	Q9QXS1 [3363-3375]	2.60445e+06	22.07
	ATVSAPFGK		1	1	1	Q9QXS1	0	877.478	439.242			0.001355	2.42	[K].ATVSAPFGK.[F]	Q9QXS1 [3052-3060]	2.7138e+06	21.67
	AVTGYKDPYSGK		1	1	1	Q9QXS1	1	1285.64	643.324			4.923e-06	2.39	[R].AVTGYKDPYSGK.[L]	Q9QXS1 [4154-4165]	1.00367e+06	17.54
	AVTGYKDPYSGNTISLFQAMK	1xOxidation [M20]	1	1	1	Q9QXS1	1	2307.13	769.717			0.0001196	2.67	[K].AVTGYKDPYSGNTISLFQAMK.[K]	Q9QXS1 [3576-3596]	1.11225e+06	33.43
	AVTGYKDPYTGEQISLFQAMK	1xOxidation [M20]	1	1	1	Q9QXS1	1	2363.16	788.392			1.302e-05	2.46	[R].AVTGYKDPYTGEQISLFQAMK.[K]	Q9QXS1 [2917-2937]	838636	33.71
	AVTGYRDPYTEQTISLFQAMK	1xOxidation [M20]	1	1	1	Q9QXS1	1	2435.19	812.401			1.143e-06	2.67	[R].AVTGYRDPYTEQTISLFQAMK.[K]	Q9QXS1 [3911-3931]
	DDPSGQMLLLLSDAR		1	1	1	Q9QXS1	0	1630.81	815.909			0.0001964	1.79	[R].DDPSGQMLLLLSDAR.[K]	Q9QXS1 [4011-4025]	336260	44.1
	DGRHPQGEQMYR		1	1	1	Q9QXS1	1	1473.67	491.893			0.04861	1.02	[K].DGRHPQGEQMYR.[R]	Q9QXS1 [609-620]
	DLDKADGMIR		1	1	1	Q9QXS1	1	1133.56	378.525			0.05757	0.81	[R].DLDKADGMIR.[L]	Q9QXS1 [589-598]	255737	21.27
	DLDKADGMIR	1xOxidation [M8]	1	1	2	Q9QXS1	1	1149.56	383.856			0.006993	1.28	[R].DLDKADGMIR.[L]	Q9QXS1 [589-598]	576564	16.19
	DPYSGQSVSLFQALK		1	1	1	Q9QXS1	0	1639.83	820.424			0.000606	1.77	[R].DPYSGQSVSLFQALK.[K]	Q9QXS1 [3251-3265]	664480	39.78
	DSQDAGGFGPEDR		1	1	1	Q9QXS1	0	1350.56	675.779			3.633e-05	2.82	[R].DSQDAGGFGPEDR.[L]	Q9QXS1 [1084-1096]	1612964	19.28
	DTHDQLSEPSEVR		1	1	2	Q9QXS1	0	1512.69	756.848			3.283e-06	2.9	[K].DTHDQLSEPSEVR.[S]	Q9QXS1 [3976-3988]	801914	18.74
	EAQAVPATLQELEATK		1	1	1	Q9QXS1	0	1698.89	849.947			0.0008765	1.57	[K].EAQAVPATLQELEATK.[A]	Q9QXS1 [1259-1274]	657531	33.96
	ELAQEQAR		1	1	1	Q9QXS1	0	944.48	472.743			0.06875	0.9	[K].ELAQEQAR.[R]	Q9QXS1 [2482-2489]
	ELSEVGSVR		1	1	1	Q9QXS1	0	975.511	488.259			0.00753	1.93	[K].ELSEVGSVR.[T]	Q9QXS1 [3484-3492]	3.97715e+06	19.02
	ESYSALMR		1	1	1	Q9QXS1	0	956.451	478.731			0.01198	2.01	[K].ESYSALMR.[E]	Q9QXS1 [801-808]	541147	23.43
	ETLEQAK		1	1	1	Q9QXS1	0	818.425	409.715			0.05555	0.95	[R].ETLEQAK.[V]	Q9QXS1 [3376-3382]	168693	10.02
	ETLEQAKVEVPVGSFK		1	1	2	Q9QXS1	1	1760.94	880.974			7.146e-06	1.96	[R].ETLEQAKVEVPVGSFK.[G]	Q9QXS1 [3376-3391]	737979	30.69
	EVAEADSVR		1	1	1	Q9QXS1	0	975.474	488.239			0.01462	2.06	[R].EVAEADSVR.[Q]	Q9QXS1 [3153-3161]	1.41286e+06	13.49
	FAEQTLR		1	1	1	Q9QXS1	0	864.457	432.732			0.05303	1.68	[K].FAEQTLR.[Q]	Q9QXS1 [2318-2324]	1.03039e+06	18.22
	FLEEEAEK		1	1	1	Q9QXS1	0	994.473	497.739			0.007756	1.36	[R].FLEEEAEK.[M]	Q9QXS1 [2410-2417]
	FLEGTSCIAGVFVDATK	1xCarbamidomethyl [C7]	1	1	1	Q9QXS1	0	1814.9	907.949			0.002507	1.77	[K].FLEGTSCIAGVFVDATK.[E]	Q9QXS1 [4072-4088]	147180	41.89
	FLEVQYLTGGLIEPDTPGR		1	1	2	Q9QXS1	0	2105.09	1053.04			0.0009347	1.82	[R].FLEVQYLTGGLIEPDTPGR.[V]	Q9QXS1 [4531-4549]	1.06037e+06	44.8
	GFFDPNTEENLTYLQLMER		1	1	1	Q9QXS1	0	2317.08	773.031			0.05258	0.96	[K].GFFDPNTEENLTYLQLMER.[C]	Q9QXS1 [4233-4251]	91508.7	46.36
	GFFDPNTEENLTYLQLMER	1xOxidation [M17]	1	1	1	Q9QXS1	0	2333.08	778.361			0.0004494	2.22	[K].GFFDPNTEENLTYLQLMER.[C]	Q9QXS1 [4233-4251]
	GGAEGELQALR		1	1	1	Q9QXS1	0	1100.57	550.788			0.0001204	2.76	[R].GGAEGELQALR.[A]	Q9QXS1 [1614-1624]	570477	24.27
	GGELVYTDTEAR		1	1	1	Q9QXS1	0	1310.62	655.813			0.0001978	2.81	[K].GGELVYTDTEAR.[D]	Q9QXS1 [3035-3046]	3.99798e+06	22.13
	GHLSGLAK		1	1	1	Q9QXS1	0	782.452	391.728			0.01931	1.69	[K].GHLSGLAK.[R]	Q9QXS1 [924-931]	927259	12.24
	GLFDEEMNEILTDPSDDTK		1	1	1	Q9QXS1	0	2168.95	1084.98			0.0003732	1.59	[R].GLFDEEMNEILTDPSDDTK.[G]	Q9QXS1 [4214-4232]
	GLFDEEMNEILTDPSDDTK	1xOxidation [M7]	1	1	1	Q9QXS1	0	2184.95	1092.98			0.02087	1.07	[R].GLFDEEMNEILTDPSDDTK.[G]	Q9QXS1 [4214-4232]
	GLILKDHGIR		1	1	1	Q9QXS1	1	1121.68	374.565			0.0004734	1.63	[K].GLILKDHGIR.[L]	Q9QXS1 [4176-4185]
	GLLRPSTATLLLEAQAATGFLVDPVR		1	1	1	Q9QXS1	0	2709.53	903.846			6.777e-12	3.57	[R].GLLRPSTATLLLEAQAATGFLVDPVR.[N]	Q9QXS1 [3522-3547]	257250	51.37
	GLLSAEVAR		1	1	1	Q9QXS1	0	915.526	458.266			0.01501	2.33	[K].GLLSAEVAR.[L]	Q9QXS1 [3857-3865]	3248445	25.07
	GLVEDTLR		1	1	1	Q9QXS1	0	902.494	451.75			0.02543	1.89	[K].GLVEDTLR.[Q]	Q9QXS1 [2056-2063]	567477	24.46
	GLVGPELHDR		1	1	2	Q9QXS1	0	1092.58	364.863			7.919e-05	2.53	[K].GLVGPELHDR.[L]	Q9QXS1 [3895-3904]	2.83859e+06	20.56
	GMHQSIEEFR		1	1	1	Q9QXS1	0	1233.57	617.288			0.001143	1.7	[R].GMHQSIEEFR.[A]	Q9QXS1 [705-714]	416691	20.96
	GYFDEEMNR		1	1	1	Q9QXS1	0	1160.47	580.736			0.009844	1.7	[R].GYFDEEMNR.[IV]	Q9QXS1 [2977-2985]; [3636-3644]	2.60234e+06	25.43
	GYFDEEMNR	1xOxidation [M7]	1	1	1	Q9QXS1	0	1176.46	588.734			0.008318	1.39	[R].GYFDEEMNR.[IV]	Q9QXS1 [2977-2985]; [3636-3644]	3301587	20.93
	GYLDKETNR		1	1	2	Q9QXS1	1	1095.54	365.852			0.001396	2.09	[R].GYLDKETNR.[A]	Q9QXS1 [3305-3313]	2.34558e+06	14.73
	GYLNKDTHDQLSEPSEVR		1	1	1	Q9QXS1	1	2088	696.67			1.181e-09	3.56	[R].GYLNKDTHDQLSEPSEVR.[S]	Q9QXS1 [3971-3988]
	GYYSPYSVSGSGSTAGSR		1	1	1	Q9QXS1	0	1782.79	891.896			1.993e-09	4.15	[K].GYYSPYSVSGSGSTAGSR.[T]	Q9QXS1 [4617-4634]	1.3964e+06	24.08
	HHTAAFEER		1	1	2	Q9QXS1	0	1097.51	366.508			7.263e-06	2.76	[R].HHTAAFEER.[K]	Q9QXS1 [445-453]	598179	10.06
	HYQQLLQSLEQGEQEESR		1	1	1	Q9QXS1	0	2202.04	734.684			4.764e-06	2.46	[R].HYQQLLQSLEQGEQEESR.[C]	Q9QXS1 [1109-1126]
	KGLLSAEVAR		1	1	1	Q9QXS1	1	1043.62	522.315			0.03623	1.71	[K].KGLLSAEVAR.[L]	Q9QXS1 [3856-3865]	205842	21.13
	KGLVGPELHDR		1	1	1	Q9QXS1	1	1220.67	407.561			5.27e-08	4.14	[R].KGLVGPELHDR.[L]	Q9QXS1 [3894-3904]	2060669	17.46
	KQEELQHLEQQR		1	1	1	Q9QXS1	1	1565.8	522.607			9.58e-06	2.41	[R].KQEELQHLEQQR.[Q]	Q9QXS1 [2714-2725]
	KQITVEELVR		1	1	1	Q9QXS1	1	1214.71	405.574			0.01254	2.67	[R].KQITVEELVR.[S]	Q9QXS1 [4034-4043]	1.04559e+06	26.25
	LAAISEATR		1	1	3	Q9QXS1	0	931.521	466.261			0.01139	1.99	[K].LAAISEATR.[L]	Q9QXS1 [1984-1992]	794861	19.31
	LAQGHTTVAELTQR		1	1	2	Q9QXS1	0	1524.81	762.91			6.751e-08	2.81	[R].LAQGHTTVAELTQR.[E]	Q9QXS1 [2816-2829]	1.526e+06	21.16
	LDLQYAK		1	1	1	Q9QXS1	0	850.467	425.736			0.07575	1.94	[R].LDLQYAK.[L]	Q9QXS1 [742-748]	2702318	22.82
	LEDLLQDAQDEKEQLNEYK		1	1	1	Q9QXS1	1	2321.11	774.374			5.668e-07	2.77	[R].LEDLLQDAQDEKEQLNEYK.[G]	Q9QXS1 [905-923]	523190	34.49
	LEQLFQDEVAK		1	1	1	Q9QXS1	0	1319.68	660.344			0.0004991	2.23	[K].LEQLFQDEVAK.[A]	Q9QXS1 [2661-2671]	6.46213e+06	30.29
	LFNAIIHR		1	1	3	Q9QXS1	0	983.579	328.53			0.0002716	2.59	[R].LFNAIIHR.[H]	Q9QXS1 [340-347]	4.6695e+06	26.61
	LGFHLPLEVAYQR		1	1	2	Q9QXS1	0	1542.84	514.951			0.0001219	2.23	[R].LGFHLPLEVAYQR.[G]	Q9QXS1 [3958-3970]	2.4915e+06	38.67
	LHVAILER		1	1	1	Q9QXS1	0	950.578	475.792			0.006236	2.04	[K].LHVAILER.[E]	Q9QXS1 [521-528]	1536192	25.93
	LKAEVTEAAR		1	1	1	Q9QXS1	1	1087.61	544.31			0.005734	1.43	[R].LKAEVTEAAR.[Q]	Q9QXS1 [2357-2366]
	LKAGVGAPVTQVTLQSTQR		1	1	1	Q9QXS1	1	1954.11	652.04			0.01895	1.55	[R].LKAGVGAPVTQVTLQSTQR.[R]	Q9QXS1 [640-658]	274030	26.81
	IKEIQNTGDR		1	1	1	Q9QXS1	1	1173.62	587.314			0.0101	1.56	[K].IKEIQNTGDR.[L]	Q9QXS1 [817-826]	286415	11.93
	LLAEENQR		1	1	1	Q9QXS1	0	972.511	486.757			0.05165	1.73	[K].LLAEENQR.[L]	Q9QXS1 [2731-2738]	1.44449e+06	14.6
	LLDAQLATGGIVDPR		1	1	2	Q9QXS1	0	1538.85	769.931			4.59e-09	3.59	[R].LLDAQLATGGIVDPR.[L]	Q9QXS1 [3943-3957]	2.72824e+06	34.87
	LLDAQLSTGGIVDPSK		1	1	1	Q9QXS1	0	1613.87	807.439			2.697e-09	4.07	[R].LLDAQLSTGGIVDPSK.[S]	Q9QXS1 [3277-3292]	2.91925e+06	33.22
	LLEAAAQSSK		1	1	1	Q9QXS1	0	1017.56	509.285			0.002469	2.02	[R].LLEAAAQSSK.[G]	Q9QXS1 [4607-4616]	3.44074e+06	15.94
	LLEAQACTGGIIDPSTGERFPVTEAVNK	1xCarbamidomethyl [C7]	1	1	1	Q9QXS1	1	2973.5	991.84			0.006386	2	[R].LLEAQACTGGIIDPSTGERFPVTEAVNK.[G]	Q9QXS1 [4455-4482]
	LLFNDVQTLK		1	1	1	Q9QXS1	0	1190.68	595.842			0.000376	2.48	[R].LLFNDVQTLK.[D]	Q9QXS1 [599-608]	4248709	34.15
	LLPLKGAEK		1	1	2	Q9QXS1	1	968.614	323.542			0.0668	1.5	[R].LLPLKGAEK.[T]	Q9QXS1 [3684-3692]	526784	19.36
	LLPLTDK		1	1	1	Q9QXS1	0	799.492	400.249			0.05037	1.55	[R].LLPLTDK.[A]	Q9QXS1 [3025-3031]	2.27855e+06	24.69
	IISLETYNLFR		1	1	1	Q9QXS1	0	1368.75	684.878			5.261e-05	2.12	[R].IISLETYNLFR.[E]	Q9QXS1 [3801-3811]	1.51342e+06	41.74
	LISLFQAMK		1	1	1	Q9QXS1	0	1050.6	525.803			0.0001384	2.29	[K].LISLFQAMK.[K]	Q9QXS1 [4166-4174]	1.25342e+06	38.72
	LMADFQAGR		1	1	1	Q9QXS1	0	1008.49	504.75			0.002739	1.66	[R].LMADFQAGR.[V]	Q9QXS1 [3748-3756]	1666823	24.12
	LMADFQAGR	1xOxidation [M2]	1	1	1	Q9QXS1	0	1024.49	512.746			0.00202	1.95	[R].LMADFQAGR.[V]	Q9QXS1 [3748-3756]	1.69252e+06	20.55
	LPLDKDPAR		1	1	1	Q9QXS1	1	1024.58	512.792			0.02111	1.41	[R].LPLDKDPAR.[E]	Q9QXS1 [1154-1162]
	LPVDVAYQR		1	1	1	Q9QXS1	0	1060.58	530.796			0.006541	2.21	[R].LPVDVAYQR.[G]	Q9QXS1 [3627-3635]	6110781	25.5
	LPVEVAYK		1	1	1	Q9QXS1	0	918.529	459.766			0.008235	1.74	[R].LPVEVAYK.[R]	Q9QXS1 [4205-4212]	1.07889e+06	25.29
	LQLEETDHQK		1	1	1	Q9QXS1	0	1240.62	414.209			0.01989	0.79	[R].LQLEETDHQK.[S]	Q9QXS1 [2338-2347]	375437	15.67
	LQLETTER		1	1	1	Q9QXS1	0	989.526	495.267			0.07307	1.54	[R].LQLETTER.[Q]	Q9QXS1 [1604-1611]	925938	19.44
	LQNVQIALDYLR		1	1	1	Q9QXS1	0	1445.81	723.411			8.983e-06	3.08	[K].LQNVQIALDYLR.[H]	Q9QXS1 [248-259]	780366	39.25
	LRAETEQGEQQR		1	1	1	Q9QXS1	1	1444.71	482.245			0.04217	1.19	[R].LRAETEQGEQQR.[Q]	Q9QXS1 [1863-1874]
	LRDVSAYSK		1	1	1	Q9QXS1	1	1038.56	346.857			0.001084	2.52	[K].LRDVSAYSK.[Y]	Q9QXS1 [4569-4577]	742939	14.68
	LRLPLDKDPAR		1	1	1	Q9QXS1	2	1293.76	431.925			0.01846	0.97	[R].LRLPLDKDPAR.[E]	Q9QXS1 [1152-1162]	879944	23.64
	LSIYEALK		1	1	1	Q9QXS1	0	936.54	468.774			0.05025	0.81	[K].LSIYEALK.[K]	Q9QXS1 [3182-3189]	172715	32
	LSIYEALKK		1	1	3	Q9QXS1	1	1064.64	355.549			0.001811	1.53	[K].LSIYEALKK.[D]	Q9QXS1 [3182-3190]	2.57384e+06	27.75
	LSVYTALQR		1	1	1	Q9QXS1	0	1050.59	525.799			0.008444	2.61	[K].LSVYTALQR.[Q]	Q9QXS1 [2854-2862]	2.89028e+06	28.68
	ISYKDALDR		1	1	3	Q9QXS1	1	1080.57	360.859			0.004238	1.74	[K].ISYKDALDR.[S]	Q9QXS1 [4588-4596]	1.80144e+06	22.05
	LSYTQLLK		1	1	1	Q9QXS1	0	965.567	483.287			0.003135	2.04	[R].LSYTQLLK.[R]	Q9QXS1 [3999-4006]	3.35497e+06	31.36
	LSYTQLLKR		1	1	2	Q9QXS1	1	1121.67	374.56			0.000948	2.49	[R].LSYTQLLKR.[C]	Q9QXS1 [3999-4007]	1.8237e+06	27.92
	LTAEDLYEAR		1	1	1	Q9QXS1	0	1180.58	590.794			0.0002766	3.02	[R].LTAEDLYEAR.[I]	Q9QXS1 [3791-3800]	4.04141e+06	27.9
	LTVDEAVR		1	1	1	Q9QXS1	0	902.494	451.75			0.01158	2.2	[R].LTVDEAVR.[AK]	Q9QXS1 [3220-3227]; [3886-3893]	8601532	20.96
	LTVDEAVRK		1	1	2	Q9QXS1	1	1030.59	344.201			0.007876	1.89	[R].LTVDEAVRK.[G]	Q9QXS1 [3886-3894]	671031	17.77
	LTVEEAVR		1	2	1	Q9QXS1	0	916.51	458.757			0.01297	2.12	[RK].LTVEEAVR.[HM]	Q9QXS1 [4129-4136]	5.81537e+06	21.8
	LTVNEAVK		1	1	1	Q9QXS1	0	873.504	437.256			0.01522	2.01	[R].LTVNEAVK.[E]	Q9QXS1 [2892-2899]	2.11843e+06	18.77
	IVITVVEEHER		1	1	2	Q9QXS1	0	1323.73	441.912			1.075e-05	2.74	[K].IVITVVEEHER.[K]	Q9QXS1 [3102-3112]
	LYVHEAVK		1	1	2	Q9QXS1	0	958.536	320.183			0.0003568	1.8	[R].LYVHEAVK.[A]	Q9QXS1 [3551-3558]	1.93287e+06	16.24
	MGIVGPEFK	1xOxidation [M1]	1	1	1	Q9QXS1	0	993.507	497.253			0.007192	2.05	[R].MGIVGPEFK.[D]	Q9QXS1 [4137-4145]	1.63602e+06	25.59
	MGIVGPEFKDK		1	1	1	Q9QXS1	1	1220.63	610.82			0.002233	1.52	[R].MGIVGPEFKDK.[L]	Q9QXS1 [4137-4147]	1.66895e+06	25.17
	MGIVGPEFKDK	1xOxidation [M1]	1	1	1	Q9QXS1	1	1236.63	412.881			0.00024	1.91	[R].MGIVGPEFKDK.[L]	Q9QXS1 [4137-4147]	1.00751e+06	21.69
	MSAAQALK		1	1	1	Q9QXS1	0	819.439	410.222			0.0217	1.68	[K].MSAAQALK.[K]	Q9QXS1 [4512-4519]	417606	16.9
	MSAAQALKK		1	1	1	Q9QXS1	1	947.534	474.27			0.04698	1.04	[K].MSAAQALKK.[G]	Q9QXS1 [4512-4520]	255442	14.09
	MVEGYQGLR		1	1	1	Q9QXS1	0	1052.52	526.763			0.004143	1.62	[R].MVEGYQGLR.[C]	Q9QXS1 [319-327]
	MVEGYQGLR	1xOxidation [M1]	1	1	1	Q9QXS1	0	1068.51	534.761			0.005365	1.6	[R].MVEGYQGLR.[C]	Q9QXS1 [319-327]	1.72525e+06	19.92
	NDESQLSPATR		1	1	1	Q9QXS1	0	1217.58	609.294			0.001742	2.07	[R].NDESQLSPATR.[G]	Q9QXS1 [722-732]	601098	16.17
	NLELHYQAFLR		1	1	1	Q9QXS1	0	1403.74	468.584			0.04936	1.01	[R].NLELHYQAFLR.[D]	Q9QXS1 [1073-1083]	476104	34.2
	NLVDNITGQR		1	1	1	Q9QXS1	0	1129.6	565.301			0.0007643	2.57	[R].NLVDNITGQR.[L]	Q9QXS1 [4445-4454]	5.72078e+06	26.95
	QAEAELALR		1	1	1	Q9QXS1	0	1000.54	500.773			0.01301	1.67	[R].QAEAELALR.[V]	Q9QXS1 [1657-1665]	516412	22.59
	QKVPAQQLQEAGILSQEELQR		1	1	1	Q9QXS1	1	2393.28	798.43			2.283e-05	2.76	[R].QKVPAQQLQEAGILSQEELQR.[L]	Q9QXS1 [2795-2815]	520456	32.21
	QLLEEELAR		1	1	1	Q9QXS1	0	1100.59	550.797			0.0585	1.34	[R].QLLEEELAR.[L]	Q9QXS1 [1875-1883]
	QQNLASYDYVR		1	1	1	Q9QXS1	0	1356.65	678.83			3.659e-05	2.46	[R].QQNLASYDYVR.[R]	Q9QXS1 [3778-3788]
	QTLTIYQALK		1	1	1	Q9QXS1	0	1178.68	589.842			0.001693	1.33	[R].QTLTIYQALK.[K]	Q9QXS1 [3846-3855]	280988	32.02
	QTNLENLDQAFSVAER		1	1	2	Q9QXS1	0	1834.89	917.952			0.0001561	1.46	[R].QTNLENLDQAFSVAER.[D]	Q9QXS1 [361-376]	516106	36.81
	QYDIDDAITK		1	1	1	Q9QXS1	0	1181.57	591.287			0.000467	2.17	[R].QYDIDDAITK.[N]	Q9QXS1 [4346-4355]	2.36962e+06	26.24
	RDDPSGQMLLLLSDAR		1	1	1	Q9QXS1	1	1786.91	596.311			0.001845	1.69	[R].RDDPSGQMLLLLSDAR.[K]	Q9QXS1 [4010-4025]	342557	39.15
	RDDPSGQMLLLLSDAR	1xOxidation [M8]	1	1	1	Q9QXS1	1	1802.91	601.64			0.0001879	1.82	[R].RDDPSGQMLLLLSDAR.[K]	Q9QXS1 [4010-4025]	251570	31.87
	RKQEELQHLEQQR		1	1	2	Q9QXS1	2	1721.9	431.231			0.000716	2.69	[R].RKQEELQHLEQQR.[Q]	Q9QXS1 [2713-2725]	1.10355e+06	15.24
	RLEEQAALHK		1	1	1	Q9QXS1	1	1194.66	398.89			0.006784	1.97	[R].RLEEQAALHK.[A]	Q9QXS1 [2024-2033]
	RPELEDSTLR		1	1	2	Q9QXS1	0	1215.63	608.317			2.956e-05	2.72	[R].RPELEDSTLR.[Y]	Q9QXS1 [659-668]	5.31021e+06	18.99
	SAEVELQSK		1	1	1	Q9QXS1	0	990.51	495.758			0.001978	1.56	[R].SAEVELQSK.[R]	Q9QXS1 [1718-1726]	260900	15.69
	SALDQYR		1	1	1	Q9QXS1	0	852.421	426.714			0.08054	1.99	[R].SALDQYR.[A]	Q9QXS1 [4361-4367]	3.85278e+06	18.15
	SDQLTGLSLLPLSEK		1	1	1	Q9QXS1	0	1600.88	800.944			1.042e-07	2.68	[R].SDQLTGLSLLPLSEK.[A]	Q9QXS1 [3345-3359]	1.12065e+06	41.77
	SFLSEKDSLLQR		1	1	2	Q9QXS1	1	1422.76	711.884			7.203e-06	2.63	[K].SFLSEKDSLLQR.[E]	Q9QXS1 [2639-2650]	818750	29.46
	SHRVPLDVAYAR		1	1	1	Q9QXS1	1	1383.75	461.921			2.365e-08	3.94	[K].SHRVPLDVAYAR.[G]	Q9QXS1 [3293-3304]	2.07783e+06	21.98
	SKEQAELEAAR		1	1	1	Q9QXS1	1	1231.63	616.317			0.004888	1.33	[R].SKEQAELEAAR.[Q]	Q9QXS1 [2106-2116]	331062	14.41
	SKVIYQSLEGAVQAGQLK		1	1	1	Q9QXS1	1	1919.06	640.359			3.498e-05	2.48	[R].SKVIYQSLEGAVQAGQLK.[I]	Q9QXS1 [487-504]
	SLAAEEEAAR		1	1	1	Q9QXS1	0	1046.51	523.758			0.0001112	2.63	[R].SLAAEEEAAR.[Q]	Q9QXS1 [2138-2147]
	SLESLHGFVAAATK		1	1	2	Q9QXS1	0	1430.76	715.883			3.689e-09	3.33	[R].SLESLHGFVAAATK.[E]	Q9QXS1 [759-772]	2.94274e+06	31.08
	SMVEEGTGLR		1	1	1	Q9QXS1	0	1078.52	539.762			0.006529	2.32	[R].SMVEEGTGLR.[L]	Q9QXS1 [4597-4606]	2594454	20.49
	SMVEEGTGLR	1xOxidation [M2]	1	1	1	Q9QXS1	0	1094.51	547.759			0.007055	2.25	[R].SMVEEGTGLR.[L]	Q9QXS1 [4597-4606]	1146645	15.9
	SQVEEELFSVR		1	1	1	Q9QXS1	0	1322.66	661.833			0.0006279	2.12	[R].SQVEEELFSVR.[V]	Q9QXS1 [2369-2379]	918467	32.82
	SQVMDEATALQLQEGLTSIEEVTK	1xOxidation [M4]	1	1	1	Q9QXS1	0	2636.3	879.434			0.009508	1	[R].SQVMDEATALQLQEGLTSIEEVTK.[N]	Q9QXS1 [4044-4067]	377716	44.29
	SSIAGLLLKPTNEK		1	1	2	Q9QXS1	0	1470.85	490.956			1.49e-08	3.14	[R].SSIAGLLLKPTNEK.[L]	Q9QXS1 [2840-2853]	2.94853e+06	31.03
	SSSVGSSSSYPISSAGPR		1	1	1	Q9QXS1	0	1712.81	856.907			4.606e-09	3.48	[R].SSSVGSSSSYPISSAGPR.[T]	Q9QXS1 [4391-4408]	1.75825e+06	22.58
	SYVDPSTDER		1	1	1	Q9QXS1	0	1168.51	584.755			0.00795	1.66	[R].SYVDPSTDER.[L]	Q9QXS1 [3989-3998]	2.25921e+06	17.14
	TEVVETTQVYTEEETRR		1	1	1	Q9QXS1	1	2070	690.673			6.668e-07	3.99	[K].TEVVETTQVYTEEETRR.[A]	Q9QXS1 [3693-3709]	1.90251e+06	24.03
	TISLVIR		1	1	1	Q9QXS1	0	801.519	401.262			0.05399	1.44	[K].TISLVIR.[S]	Q9QXS1 [1235-1241]	1.11342e+06	29.07
	VEVPVGSFK		1	1	1	Q9QXS1	0	961.535	481.272			0.007967	2.29	[K].VEVPVGSFK.[G]	Q9QXS1 [3383-3391]	3613694	27.33
	VLADPSDDTK		1	1	1	Q9QXS1	0	1060.52	530.761			0.000326	1.94	[R].VLADPSDDTK.[G]	Q9QXS1 [3645-3654]	1.52084e+06	15.5
	VLALPEPSPAAPTLR		1	1	2	Q9QXS1	0	1531.88	766.444			9.89e-06	2.68	[K].VLALPEPSPAAPTLR.[S]	Q9QXS1 [1195-1209]	3396461	35.18
	VIYQSLEGAVQAGQLK		1	1	2	Q9QXS1	0	1703.93	852.469			8.546e-08	3.24	[K].VIYQSLEGAVQAGQLK.[I]	Q9QXS1 [489-504]	692754	34.06
	VPAQQLQEAGILSQEELQR		1	1	1	Q9QXS1	0	2137.12	713.046			1.415e-07	2.71	[K].VPAQQLQEAGILSQEELQR.[L]	Q9QXS1 [2797-2815]	697592	34.54
	VPGAQDGVR		1	1	1	Q9QXS1	0	898.474	449.74			0.00109	1.85	[R].VPGAQDGVR.[A]	Q9QXS1 [413-421]	1.90015e+06	13.28
	VPLDVAYAR		1	1	1	Q9QXS1	0	1003.56	502.282			0.001289	2.4	[R].VPLDVAYAR.[G]	Q9QXS1 [3296-3304]	4138688	26.22
	VPVDVAYK		1	1	1	Q9QXS1	0	890.498	445.752			0.009099	1.07	[R].VPVDVAYK.[R]	Q9QXS1 [2968-2975]	1.34416e+06	21.58
	VPVDVAYKR		1	1	1	Q9QXS1	1	1046.6	349.537			4.254e-05	2.99	[R].VPVDVAYKR.[G]	Q9QXS1 [2968-2976]	2.40979e+06	18.88
	VQMEELGK		1	1	1	Q9QXS1	0	933.471	467.238			0.04457	1.06	[R].VQMEELGK.[L]	Q9QXS1 [2380-2387]
	VQSGSESVIQEYVDLR		1	1	1	Q9QXS1	0	1808.9	904.952			2.439e-08	2.98	[K].VQSGSESVIQEYVDLR.[T]	Q9QXS1 [1450-1465]	751898	37.09
	VSLDEALQR		1	1	1	Q9QXS1	0	1030.55	515.778			0.002537	2.73	[R].VSLDEALQR.[G]	Q9QXS1 [4550-4558]	8685230	26.43
	VSITEAMHR		1	1	2	Q9QXS1	0	1043.53	348.515			0.0001795	2.39	[K].VSITEAMHR.[N]	Q9QXS1 [4436-4444]	3.24804e+06	20.98
	VSITEAMHR	1xOxidation [M7]	1	1	1	Q9QXS1	0	1059.53	530.266			0.01247	1.63	[K].VSITEAMHR.[N]	Q9QXS1 [4436-4444]	1.23039e+06	14.73
	VTLVQTLEIQR		1	1	1	Q9QXS1	0	1299.76	650.383			0.00335	1.6	[K].VTLVQTLEIQR.[Q]	Q9QXS1 [2573-2583]
	VTIYEAMR		1	1	1	Q9QXS1	0	982.503	491.754			0.008717	2.02	[K].VTIYEAMR.[R]	Q9QXS1 [3513-3520]	1.78489e+06	26.19
	VTIYEAMR	1xOxidation [M7]	1	1	1	Q9QXS1	0	998.498	499.751			0.03125	1.59	[K].VTIYEAMR.[R]	Q9QXS1 [3513-3520]	1.91532e+06	20.01
	VVIVDPETGKEMSVYEAYR		1	1	1	Q9QXS1	1	2185.08	729.031			4.52e-05	2.2	[R].VVIVDPETGKEMSVYEAYR.[K]	Q9QXS1 [4285-4303]
	VVIVDPETGKEMSVYEAYR	1xOxidation [M12]	1	1	1	Q9QXS1	1	2201.08	734.365			2.458e-07	3.08	[R].VVIVDPETGKEMSVYEAYR.[K]	Q9QXS1 [4285-4303]	574471	30.06
	VVIVDPETGKEMSVYEAYRK		1	1	1	Q9QXS1	2	2313.18	579.049			0.005826	1.66	[R].VVIVDPETGKEMSVYEAYRK.[G]	Q9QXS1 [4285-4304]	493658	30.77
	VVIVDPETGKEMSVYEAYRK	1xOxidation [M12]	1	1	2	Q9QXS1	2	2329.17	583.048			6.095e-07	2.5	[R].VVIVDPETGKEMSVYEAYRK.[G]	Q9QXS1 [4285-4304]	1.17021e+06	27.45
	WQAVLAQTDVR		1	1	1	Q9QXS1	0	1286.69	643.846			8.974e-05	2.6	[R].WQAVLAQTDVR.[Q]	Q9QXS1 [1333-1343]	648952	28.88
	YASGPSASLGGPESAVA		1	1	1	Q9QXS1	0	1520.72	760.863			0.03624	1.67	[R].YASGPSASLGGPESAVA.[-]	Q9QXS1 [4675-4691]	1.10074e+06	28.74
	YLYGTGAVAGVYLPGSR		1	1	1	Q9QXS1	0	1743.91	872.458			2.97e-07	2.15	[R].YLYGTGAVAGVYLPGSR.[Q]	Q9QXS1 [3829-3845]
	YSELTTLTSQYIK		1	1	1	Q9QXS1	0	1546.8	773.903			7.722e-09	3.33	[R].YSELTTLTSQYIK.[F]	Q9QXS1 [1468-1480]	1.44746e+06	35.94
P68033	Actin, alpha cardiac muscle 1 OS=Mus musculus OX=10090 GN=Actc1 PE=1 SV=1	317.11	42	22	288	1	377	42	5.39
	Sequence	Modifications	# Protein Groups	# Proteins	# PSMs	Master Protein Accessions	# Missed Cleavages	Theo. MH+ [Da]	m/z [Da] (by Search Engine): Sequest HT			Percolator PEP (by Search Engine): Sequest HT	XCorr (by Search Engine): Sequest HT	Annotated Sequence	Positions in Master Proteins	Abundance: F5: Sample	Top Apex RT [min]
	AGFAGDDAPR		3	6	45	P60710; P68033; P63260	0	976.448	488.727			5.632e-05	2.41	[K].AGFAGDDAPR.[A]	P60710 [19-28]; P68033 [21-30]; P63260 [19-28]	1.21638e+09	16.98
	AGFAGDDAPRAVFPSIVGRPR		3	6	3	P60710; P68033; P63260	1	2156.14	719.383			5.774e-06	2.12	[K].AGFAGDDAPRAVFPSIVGRPR.[H]	P60710 [19-39]; P68033 [21-41]; P63260 [19-39]	3711233	33.01
	AVFPSIVGRPR		3	6	35	P60710; P68033; P63260	0	1198.71	400.238			2.152e-05	2.12	[R].AVFPSIVGRPR.[H]	P60710 [29-39]; P68033 [31-41]; P63260 [29-39]	1.25267e+09	28.02
	DSYVGDEAQSK		3	6	7	P60710; P68033; P63260	0	1198.52	599.762			4.102e-05	2.08	[K].DSYVGDEAQSK.[R]	P60710 [51-61]; P68033 [53-63]; P63260 [51-61]	2.2295e+08	14.76
	DSYVGDEAQSKR		3	6	12	P60710; P68033; P63260	1	1354.62	452.21			6.572e-07	2.61	[K].DSYVGDEAQSKR.[G]	P60710 [51-62]; P68033 [53-64]; P63260 [51-62]	2.89175e+08	13.74
	EITALAPSTMK		3	6	15	P60710; P68033; P63260	0	1161.62	581.313			9.24e-05	2.73	[K].EITALAPSTMK.[I]	P60710 [316-326]; P68033 [318-328]; P63260 [316-326]	5.99506e+08	26.39
	EITALAPSTMK	1xOxidation [M10]	3	6	17	P60710; P68033; P63260	0	1177.61	589.308			4.678e-05	2.52	[K].EITALAPSTMK.[I]	P60710 [316-326]; P68033 [318-328]; P63260 [316-326]	6.60668e+08	22.22
	EITALAPSTMKIK		3	6	2	P60710; P68033; P63260	1	1402.8	701.902			9.912e-05	1.98	[K].EITALAPSTMKIK.[I]	P60710 [316-328]; P68033 [318-330]; P63260 [316-328]
	EITALAPSTMKIK	1xOxidation [M10]	3	6	2	P60710; P68033; P63260	1	1418.79	709.898			0.000461	2.71	[K].EITALAPSTMKIK.[I]	P60710 [316-328]; P68033 [318-330]; P63260 [316-328]	1.06086e+06	23.42
	EIVRDIKEK		3	6	1	P60710; P68033; P63260	2	1129.66	565.332			0.001298	1.98	[R].EIVRDIKEK.[L]	P60710 [207-215]; P68033 [209-217]; P63260 [207-215]	1.36805e+06	20.01
	HQGVMVGMGQKDSYVGDEAQSK	1xOxidation [M]	3	6	5	P60710; P68033; P63260	1	2367.07	789.695			0.0002058	2.38	[R].HQGVMVGMGQKDSYVGDEAQSK.[R]	P60710 [40-61]; P68033 [42-63]; P63260 [40-61]	312557	20.37
	HQGVMVGMGQKDSYVGDEAQSK	2xOxidation [M5; M8]	3	6	1	P60710; P68033; P63260	1	2383.07	596.52			6.558e-05	2.4	[R].HQGVMVGMGQKDSYVGDEAQSK.[R]	P60710 [40-61]; P68033 [42-63]; P63260 [40-61]
	HQGVMVGMGQKDSYVGDEAQSKR		3	6	1	P60710; P68033; P63260	2	2507.18	627.548			3.253e-08	1.98	[R].HQGVMVGMGQKDSYVGDEAQSKR.[G]	P60710 [40-62]; P68033 [42-64]; P63260 [40-62]
	HQGVMVGMGQKDSYVGDEAQSKR	2xOxidation [M5; M8]	3	6	2	P60710; P68033; P63260	2	2539.17	635.544			1.673e-12	3.72	[R].HQGVMVGMGQKDSYVGDEAQSKR.[G]	P60710 [40-62]; P68033 [42-64]; P63260 [40-62]	711664	16.4
	IWHHTFYNELR		3	4	6	P60710; P68033; P63260	0	1515.75	505.92			6.992e-05	3.08	[K].IWHHTFYNELR.[V]	P60710 [85-95]; P68033 [87-97]; P63260 [85-95]	5.25034e+07	25.4
	MQKEITALAPSTMK	2xOxidation [M1; M13]	3	6	3	P60710; P68033; P63260	1	1580.8	527.605			0.0004273	1.8	[R].MQKEITALAPSTMK.[I]	P60710 [313-326]; P68033 [315-328]; P63260 [313-326]	828931	20.22
	YPIEHGIITNWDDMEK		1	4	2	P68033	0	1960.91	980.956			2.426e-06	2.59	[K].YPIEHGIITNWDDMEK.[I]	P68033 [71-86]	7.50528e+06	33.3
	YPIEHGIITNWDDMEK	1xOxidation [M14]	1	4	7	P68033	0	1976.91	988.956			8.815e-08	2.94	[K].YPIEHGIITNWDDMEK.[I]	P68033 [71-86]	2.69805e+07	30.19
	DLTDYLMK		4	7	6	Q8BFZ3; P60710; P68033; P63260	0	998.486	499.747			0.009442	1.65	[R].DLTDYLMK.[I]	Q8BFZ3 [185-192]; P60710 [184-191]; P68033 [186-193]; P63260 [184-191]	2.74753e+08	35.3
	DLTDYLMK	1xOxidation [M7]	4	7	21	Q8BFZ3; P60710; P68033; P63260	0	1014.48	507.744			0.0174	1.12	[R].DLTDYLMK.[I]	Q8BFZ3 [185-192]; P60710 [184-191]; P68033 [186-193]; P63260 [184-191]	7.20279e+08	30.5
	HQGVMVGMGQK		4	7	6	Q8BFZ3; P60710; P68033; P63260	0	1171.57	586.287			2.952e-09	3.64	[R].HQGVMVGMGQK.[D]	Q8BFZ3 [41-51]; P60710 [40-50]; P68033 [42-52]; P63260 [40-50]	170095124	17.14
	HQGVMVGMGQK	1xOxidation [M]	4	7	30	Q8BFZ3; P60710; P68033; P63260	0	1187.57	594.286			9.136e-09	3.45	[R].HQGVMVGMGQK.[D]	Q8BFZ3 [41-51]; P60710 [40-50]; P68033 [42-52]; P63260 [40-50]	2.24948e+08	14.4
	HQGVMVGMGQK	2xOxidation [M5; M8]	4	7	17	Q8BFZ3; P60710; P68033; P63260	0	1203.56	602.283			3.04e-07	2.16	[R].HQGVMVGMGQK.[D]	Q8BFZ3 [41-51]; P60710 [40-50]; P68033 [42-52]; P63260 [40-50]	5.84702e+07	9.48
	LDLAGRDLTDYLMK		4	7	2	Q8BFZ3; P60710; P68033; P63260	1	1623.84	541.951			0.0004826	1.93	[R].LDLAGRDLTDYLMK.[I]	Q8BFZ3 [179-192]; P60710 [178-191]; P68033 [180-193]; P63260 [178-191]	2.48174e+06	38.75
	LDLAGRDLTDYLMK	1xOxidation [M13]	4	7	2	Q8BFZ3; P60710; P68033; P63260	1	1639.84	820.425			5.902e-05	2.99	[R].LDLAGRDLTDYLMK.[I]	Q8BFZ3 [179-192]; P60710 [178-191]; P68033 [180-193]; P63260 [178-191]	1.65891e+07	35.71
	IKIIAPPER		4	7	2	Q8BFZ3; P60710; P68033; P63260	1	1036.65	346.221			0.002168	2.51	[K].IKIIAPPER.[K]	Q8BFZ3 [328-336]; P60710 [327-335]; P68033 [329-337]; P63260 [327-335]	71568298	22.7
	IKIIAPPERK		4	7	4	Q8BFZ3; P60710; P68033; P63260	2	1164.75	388.919			8.8e-08	2.56	[K].IKIIAPPERK.[Y]	Q8BFZ3 [328-337]; P60710 [327-336]; P68033 [329-338]; P63260 [327-336]	3.36945e+07	19.29
	IIAPPER		4	7	8	Q8BFZ3; P60710; P68033; P63260	0	795.472	398.239			0.05729	1.27	[K].IIAPPER.[K]	Q8BFZ3 [330-336]; P60710 [329-335]; P68033 [331-337]; P63260 [329-335]	622892732	18.57
	IIAPPERK		4	7	2	Q8BFZ3; P60710; P68033; P63260	1	923.567	308.527			0.0001121	2.32	[K].IIAPPERK.[Y]	Q8BFZ3 [330-337]; P60710 [329-336]; P68033 [331-338]; P63260 [329-336]	228626944	14.98
	SYELPDGQVITIGNER		4	7	21	Q8BFZ3; P60710; P68033; P63260	0	1790.89	895.947			7.243e-09	3.39	[RK].SYELPDGQVITIGNER.[F]	Q8BFZ3 [240-255]; P60710 [239-254]; P68033 [241-256]; P63260 [239-254]	6.18315e+08	36.43
	YSVWIGGSILASLSTFQQMWISK	1xOxidation [M19]	4	5	1	Q8BFZ3; P60710; P68033; P63260	0	2618.33	873.448			0.02127	1.07	[K].YSVWIGGSILASLSTFQQMWISK.[Q]	Q8BFZ3 [338-360]; P60710 [337-359]; P68033 [339-361]; P63260 [337-359]	90499.6	53.48
P57780	Alpha-actinin-4 OS=Mus musculus OX=10090 GN=Actn4 PE=1 SV=1	259.7	60	55	114	41	912	104.9	5.41
	Sequence	Modifications	# Protein Groups	# Proteins	# PSMs	Master Protein Accessions	# Missed Cleavages	Theo. MH+ [Da]	m/z [Da] (by Search Engine): Sequest HT			Percolator PEP (by Search Engine): Sequest HT	XCorr (by Search Engine): Sequest HT	Annotated Sequence	Positions in Master Proteins	Abundance: F5: Sample	Top Apex RT [min]
	ACLISLGYDVENDRQGDAEFNR	1xCarbamidomethyl [C2]	1	1	2	P57780	1	2542.16	848.059			2.726e-09	2.86	[K].ACLISLGYDVENDRQGDAEFNR.[I]	P57780 [793-814]
	AGTQIENIDEDFRDGLK		1	1	3	P57780	1	1920.93	640.98			3.942e-11	5.24	[K].AGTQIENIDEDFRDGLK.[L]	P57780 [68-84]	7.03751e+06	32.83
	ASFNHFDKDHGGALGPEEFK		1	1	2	P57780	1	2203.02	735.012			1.466e-09	4.76	[R].ASFNHFDKDHGGALGPEEFK.[A]	P57780 [773-792]	3.33782e+06	25.61
	DDPVTNLNNAFEVAEK		1	1	2	P57780	0	1775.84	888.427			2.669e-09	3.08	[K].DDPVTNLNNAFEVAEK.[Y]	P57780 [219-234]	1.40994e+06	37.09
	DGLAFNALIHR		1	1	2	P57780	0	1226.66	409.558			2.155e-06	3.27	[K].DGLAFNALIHR.[H]	P57780 [195-205]	1.15439e+07	34.28
	DHALLEEQSK		1	1	2	P57780	0	1169.58	585.295			9.711e-06	2.89	[R].DHALLEEQSK.[Q]	P57780 [635-644]	2.0456e+06	16
	DYETATLSDIK		1	1	1	P57780	0	1255.61	628.306			0.0001436	2.85	[R].DYETATLSDIK.[A]	P57780 [441-451]	14785265	28.29
	EAILAIHK		1	1	1	P57780	0	894.541	447.773			0.01864	2.42	[R].EAILAIHK.[E]	P57780 [586-593]	16544620	21.08
	ETTDTDTADQVIASFK		1	1	3	P57780	0	1741.81	871.411			1.021e-09	4.37	[R].ETTDTDTADQVIASFK.[V]	P57780 [839-854]	9.72756e+06	34.67
	GISQEQMQEFR		1	1	1	P57780	0	1352.63	676.817			9.398e-05	1.64	[K].GISQEQMQEFR.[A]	P57780 [762-772]	7233023	24.73
	GISQEQMQEFR	1xOxidation [M7]	1	1	1	P57780	0	1368.62	684.812			0.0003379	2.44	[K].GISQEQMQEFR.[A]	P57780 [762-772]	9893770	19.14
	HRPELIEYDK		1	1	2	P57780	0	1299.67	433.894			6.655e-07	2.93	[R].HRPELIEYDK.[L]	P57780 [206-215]	8.58993e+06	19
	HRPELIEYDKLR		1	1	4	P57780	1	1568.85	392.968			2.848e-08	3.84	[R].HRPELIEYDKLR.[K]	P57780 [206-217]	1.22159e+07	23.18
	HTNYTMEHIR		1	2	2	P57780	0	1301.61	434.539			5.585e-07	3.76	[K].HTNYTMEHIR.[V]	P57780 [725-734]	4.55286e+06	15.89
	HTNYTMEHIR	1xOxidation [M6]	1	2	1	P57780	0	1317.6	439.872			0.00112	2.41	[K].HTNYTMEHIR.[V]	P57780 [725-734]	2.64663e+06	12.52
	KAGTQIENIDEDFRDGLK		1	1	1	P57780	2	2049.02	683.679			5.585e-19	7.38	[R].KAGTQIENIDEDFRDGLK.[L]	P57780 [67-84]	2.2898e+06	29.88
	KDDPVTNLNNAFEVAEK		1	1	3	P57780	1	1903.94	952.476			2.308e-11	3.03	[R].KDDPVTNLNNAFEVAEK.[Y]	P57780 [218-234]	6266034	32.45
	IAESNHIK		1	1	2	P57780	0	911.495	304.502			0.001882	1.7	[R].IAESNHIK.[L]	P57780 [598-605]	2.41918e+06	8.87
	LRKDDPVTNLNNAFEVAEK		1	1	2	P57780	2	2173.12	725.043			9.202e-10	4.09	[K].LRKDDPVTNLNNAFEVAEK.[Y]	P57780 [216-234]	1.28048e+06	30.76
	LSGSNPYTTVTPQIINSK		1	1	2	P57780	0	1920.01	960.502			4.419e-10	4.62	[K].LSGSNPYTTVTPQIINSK.[W]	P57780 [606-623]	1.02933e+07	31.71
	ISIEMNGTLEDQLSHLK	1xOxidation [M5]	1	1	2	P57780	0	1943.97	648.659			1.828e-06	2.6	[R].ISIEMNGTLEDQLSHLK.[Q]	P57780 [676-692]	939065	34.45
	LVSIGAEEIVDGNAK		1	1	3	P57780	0	1514.81	757.902			8.812e-07	3.83	[K].LVSIGAEEIVDGNAK.[M]	P57780 [127-141]	7.65391e+06	31.56
	MAPYQGPDAAPGALDYK		1	1	1	P57780	0	1764.83	882.916			1.574e-08	3.02	[R].MAPYQGPDAAPGALDYK.[S]	P57780 [884-900]	3009745	29.43
	MAPYQGPDAAPGALDYK	1xOxidation [M1]	1	1	2	P57780	0	1780.82	890.913			3.372e-11	4.6	[R].MAPYQGPDAAPGALDYK.[S]	P57780 [884-900]	8.78217e+06	27.62
	MLDAEDIVNTARPDEK		1	1	2	P57780	0	1816.87	908.942			1.427e-11	4.11	[K].MLDAEDIVNTARPDEK.[A]	P57780 [241-256]	2.43992e+06	31.16
	MLDAEDIVNTARPDEK	1xOxidation [M1]	1	1	2	P57780	0	1832.87	916.937			5.54e-13	4.58	[K].MLDAEDIVNTARPDEK.[A]	P57780 [241-256]	1.11103e+07	28.74
	NFITAEELR		1	1	1	P57780	0	1092.57	546.788			0.001302	2.12	[K].NFITAEELR.[R]	P57780 [861-869]	1.23303e+06	29.34
	NFITAEELRR		1	1	2	P57780	1	1248.67	416.894			0.0006352	2.08	[K].NFITAEELRR.[E]	P57780 [861-870]	1.21783e+06	25.7
	NVNVQNFHISWK		1	1	1	P57780	0	1485.76	495.923			0.02415	0.98	[K].NVNVQNFHISWK.[D]	P57780 [183-194]
	QFASQANMVGPWIQTK		1	1	1	P57780	0	1805.9	903.442			0.07367	1.59	[R].QFASQANMVGPWIQTK.[M]	P57780 [654-669]	281772	38.6
	QGDAEFNR		1	1	1	P57780	0	936.417	468.711			0.03125	0.81	[R].QGDAEFNR.[I]	P57780 [807-814]	381632	12.83
	QLETIDQLHLEYAK		1	1	2	P57780	0	1700.89	850.947			1.027e-07	3.29	[K].QLETIDQLHLEYAK.[R]	P57780 [523-536]	1.8846e+06	32.35
	QLETIDQLHLEYAKR		1	1	1	P57780	1	1856.99	619.668			0.0002139	1.18	[K].QLETIDQLHLEYAKR.[A]	P57780 [523-537]
	QQSNEHLRR		1	1	1	P57780	1	1167.6	389.869			0.03183	1.21	[K].QQSNEHLRR.[Q]	P57780 [645-653]
	QRDYETATLSDIK		1	1	2	P57780	1	1539.76	770.386			2.192e-06	3.11	[K].QRDYETATLSDIK.[A]	P57780 [439-451]	2.57879e+06	23.78
	RDHALLEEQSK		1	1	4	P57780	1	1325.68	442.564			1.456e-08	4.36	[K].RDHALLEEQSK.[Q]	P57780 [634-644]	7.70158e+06	13.37
	SFSTALYGESDL		1	1	1	P57780	0	1289.59	645.3			0.009384	1.54	[K].SFSTALYGESDL.[-]	P57780 [901-912]	5.0489e+06	37.25
	STLPDADRER		1	1	1	P57780	1	1159.57	387.194			0.0001972	2.49	[K].STLPDADRER.[E]	P57780 [576-585]	6.30934e+06	14.12
	TIPWLEDRVPQK		1	1	2	P57780	1	1481.81	741.411			0.001047	1.48	[R].TIPWLEDRVPQK.[T]	P57780 [313-324]	481728	31.84
	TIQEMQQK		1	1	1	P57780	0	1005.5	503.255			0.006779	1.38	[K].TIQEMQQK.[L]	P57780 [325-332]
	VHKPPKVQEK		1	1	1	P57780	1	1189.71	397.239			0.01902	1.16	[R].VHKPPKVQEK.[C]	P57780 [342-351]	273037	6.75
	VLAGDKNFITAEELR		1	1	2	P57780	1	1675.9	838.454			4.223e-10	3.52	[K].VLAGDKNFITAEELR.[R]	P57780 [855-869]	3.77215e+06	30.41
	VLAGDKNFITAEELRR		1	1	2	P57780	2	1832	458.753			7.889e-06	3.39	[K].VLAGDKNFITAEELRR.[E]	P57780 [855-870]	11769526	27.6
	VLAVNQENEHLMEDYER		1	1	2	P57780	0	2088.97	1044.99			4.376e-10	3.04	[K].VLAVNQENEHLMEDYER.[L]	P57780 [285-301]	4387553	28.57
	VLAVNQENEHLMEDYER	1xOxidation [M12]	1	1	2	P57780	0	2104.96	702.325			5.899e-11	4.29	[K].VLAVNQENEHLMEDYER.[L]	P57780 [285-301]	9.26198e+06	24.46
	VQQLVPK		1	1	1	P57780	0	811.504	406.255			0.03534	2.67	[K].VQQLVPK.[R]	P57780 [627-633]	14319066	17.77
	ALDFIASK		2	3	2	P57780; Q7TPR4	0	864.483	432.744			0.002037	2.06	[K].ALDFIASK.[G]	P57780 [116-123]; Q7TPR4 [96-103]	22639940	27.55
	AIMTYVSSFYHAFSGAQK		2	2	1	P57780; Q7TPR4	0	2007.96	1004.49			3.113e-07	2.71	[K].AIMTYVSSFYHAFSGAQK.[A]	P57780 [257-274]; Q7TPR4 [237-254]	188225	43.33
	AIMTYVSSFYHAFSGAQK	1xOxidation [M3]	2	2	4	P57780; Q7TPR4	0	2023.96	675.323			9.707e-14	4.15	[K].AIMTYVSSFYHAFSGAQK.[A]	P57780 [257-274]; Q7TPR4 [237-254]	4.80121e+06	38.75
	ASIHEAWTDGK		2	2	2	P57780; Q7TPR4	0	1214.58	607.789			0.01325	1.32	[K].ASIHEAWTDGK.[E]	P57780 [423-433]; Q7TPR4 [403-413]	1.08547e+06	19.24
	ELPPDQAEYCIAR	1xCarbamidomethyl [C10]	2	2	5	P57780; Q7TPR4	0	1561.73	781.37			9.843e-06	1.67	[R].ELPPDQAEYCIAR.[M]	P57780 [871-883]; Q7TPR4 [851-863]	1.99165e+06	26.72
	FAIQDISVEETSAK		2	4	1	P57780; Q7TPR4	0	1537.77	769.387			2.82e-07	3.83	[R].FAIQDISVEETSAK.[E]	P57780 [154-167]; Q7TPR4 [134-147]	14317981	32.71
	GYEEWLLNEIR		2	3	1	P57780; Q7TPR4	0	1421.71	711.357			0.002876	1.73	[K].GYEEWLLNEIR.[R]	P57780 [397-407]; Q7TPR4 [377-387]	120789	42.45
	HEAFESDLAAHQDR		2	4	1	P57780; Q7TPR4	0	1625.73	542.581			0.01347	1.49	[RK].HEAFESDLAAHQDR.[V]	P57780 [457-470]; Q7TPR4 [437-450]
	KHEAFESDLAAHQDR		2	3	2	P57780; Q7TPR4	1	1753.83	585.279			6.876e-13	5.14	[RK].KHEAFESDLAAHQDR.[V]	P57780 [456-470]; Q7TPR4 [436-450]	2.24471e+06	16.89
	LASDLLEWIR		2	2	1	P57780; Q7TPR4	0	1215.67	608.341			0.02455	1.47	[RK].LASDLLEWIR.[R]	P57780 [302-311]; Q7TPR4 [282-291]	497713	44.17
	LDHLAEK		2	2	1	P57780; Q7TPR4	0	825.446	413.227			0.0105	1.13	[R].LDHLAEK.[F]	P57780 [412-418]; Q7TPR4 [392-398]	3851638	10.83
	LERLDHLAEK		2	2	1	P57780; Q7TPR4	1	1223.67	408.563			0.02614	1.44	[R].LERLDHLAEK.[F]	P57780 [409-418]; Q7TPR4 [389-398]	442269	18.97
	LSNRPAFMPSEGR		2	2	3	P57780; Q7TPR4	0	1461.73	731.365			4.389e-06	3.03	[R].LSNRPAFMPSEGR.[M]	P57780 [367-379]; Q7TPR4 [347-359]	1.00947e+07	22.99
	LSNRPAFMPSEGR	1xOxidation [M8]	2	2	3	P57780; Q7TPR4	0	1477.72	493.244			0.0001025	2.8	[R].LSNRPAFMPSEGR.[M]	P57780 [367-379]; Q7TPR4 [347-359]	1.09416e+07	18.59
	TINEVENQILTR		2	2	2	P57780; Q7TPR4	0	1429.76	477.26			0.0001135	2.6	[R].TINEVENQILTR.[D]	P57780 [747-758]; Q7TPR4 [727-738]	2.43102e+07	30.15
	VGWEQLLTTIAR		2	2	2	P57780; Q7TPR4	0	1386.77	693.893			5.894e-06	2.43	[R].VGWEQLLTTIAR.[T]	P57780 [735-746]; Q7TPR4 [715-726]	1.11014e+06	46.99
P05784	Keratin, type I cytoskeletal 18 OS=Mus musculus OX=10090 GN=Krt18 PE=1 SV=5	247.13	85	45	141	43	423	47.5	5.33
	Sequence	Modifications	# Protein Groups	# Proteins	# PSMs	Master Protein Accessions	# Missed Cleavages	Theo. MH+ [Da]	m/z [Da] (by Search Engine): Sequest HT			Percolator PEP (by Search Engine): Sequest HT	XCorr (by Search Engine): Sequest HT	Annotated Sequence	Positions in Master Proteins	Abundance: F5: Sample	Top Apex RT [min]
	AEGQRQAQEYEALLNIK		1	1	1	P05784	1	1961.01	654.339			0.0001852	1.57	[R].AEGQRQAQEYEALLNIK.[V]	P05784 [347-363]
	AQIFANSVDNAR		1	1	4	P05784	0	1305.65	653.33			1.32e-05	3.45	[R].AQIFANSVDNAR.[I]	P05784 [131-142]	2.20682e+08	23.59
	AQMEQLNGVLLHLESELAQTR	1xOxidation [M3]	1	1	1	P05784	0	2396.22	799.416			1.101e-07	2.76	[K].AQMEQLNGVLLHLESELAQTR.[A]	P05784 [326-346]	670703	45.33
	AQYEALAQK		1	1	2	P05784	0	1021.53	511.268			0.001515	2.6	[R].AQYEALAQK.[N]	P05784 [247-255]	161257136	17.79
	DAETTLTELR		1	1	3	P05784	0	1148.58	574.792			0.0006816	3.01	[R].DAETTLTELR.[R]	P05784 [284-293]	26226524	27.93
	DAETTLTELRR		1	1	3	P05784	1	1304.68	435.564			0.0003793	2.27	[R].DAETTLTELRR.[T]	P05784 [284-294]	2.41752e+08	24.95
	ETMQDLNDR		1	1	3	P05784	0	1121.49	561.247			0.00404	2.27	[K].ETMQDLNDR.[L]	P05784 [74-82]	24325740	17.23
	ETMQDLNDR	1xOxidation [M3]	1	1	8	P05784	0	1137.48	569.245			0.01397	0.99	[K].ETMQDLNDR.[L]	P05784 [74-82]	6.3684e+06	11.07
	ETMQDLNDRLASYLDK		1	1	1	P05784	1	1911.91	637.974			0.003817	1.7	[K].ETMQDLNDRLASYLDK.[V]	P05784 [74-89]	174928	37.52
	ETMQDLNDRLASYLDK	1xOxidation [M3]	1	1	1	P05784	1	1927.91	643.305			0.001344	1.79	[K].ETMQDLNDRLASYLDK.[V]	P05784 [74-89]	616298	32.7
	ETMQDLNDRLASYLDKVK	1xOxidation [M3]	1	1	1	P05784	2	2155.07	719.029			0.0009472	1.43	[K].ETMQDLNDRLASYLDKVK.[S]	P05784 [74-91]
	KGPQGVR		1	1	1	P05784	1	741.437	371.221			0.08142	1.59	[K].KGPQGVR.[D]	P05784 [111-117]	11333784	4.57
	KNHEEEVQGLEAQIASSGLTVEVDAPK		1	1	2	P05784	1	2878.44	960.149			1.018e-11	3.75	[K].KNHEEEVQGLEAQIASSGLTVEVDAPK.[S]	P05784 [208-234]	946438	36.5
	KVVDDTNITR		1	1	3	P05784	1	1160.63	580.816			0.000951	2.74	[R].KVVDDTNITR.[L]	P05784 [180-189]	37326932	15.37
	LAADDFRVK		1	1	2	P05784	1	1034.56	345.525			0.005279	1.28	[R].LAADDFRVK.[Y]	P05784 [152-160]	407080	20.66
	LASYLDKVK		1	1	2	P05784	1	1036.6	346.205			6.596e-05	2.32	[R].LASYLDKVK.[S]	P05784 [83-91]	123836788	21.77
	LEAEIATYR		1	1	1	P05784	0	1065.56	533.283			0.0006275	2.76	[K].LEAEIATYR.[R]	P05784 [366-374]	21801468	24.19
	LEAEIATYRR		1	1	3	P05784	1	1221.66	407.891			0.0002739	2.39	[K].LEAEIATYRR.[L]	P05784 [366-375]	6.75088e+06	20.99
	LLEDGEDFSLNDALDSSNSMQTVQK		1	1	1	P05784	0	2756.26	919.412			1.868e-06	2.77	[R].LLEDGEDFSLNDALDSSNSMQTVQK.[T]	P05784 [376-400]	3.6515e+06	38.93
	LLEDGEDFSLNDALDSSNSMQTVQK	1xOxidation [M20]	1	1	3	P05784	0	2772.25	1386.63			5.83e-13	4.13	[R].LLEDGEDFSLNDALDSSNSMQTVQK.[T]	P05784 [376-400]	2.17942e+07	36.91
	IIEDLRAQIFANSVDNAR		1	1	2	P05784	1	2045.08	682.364			1.638e-08	3.3	[K].IIEDLRAQIFANSVDNAR.[I]	P05784 [125-142]	1959030	35.34
	LQLETEIEALKEELLFMK		1	1	1	P05784	1	2177.18	1089.09			2.05e-12	4.2	[R].LQLETEIEALKEELLFMK.[K]	P05784 [190-207]
	IREHLEK		1	1	2	P05784	1	924.526	308.846			0.08036	1.41	[K].IREHLEK.[K]	P05784 [104-110]	81840536	8.35
	IVLQIDNAR		1	2	6	P05784	0	1041.61	521.306			0.001236	2.37	[RK].IVLQIDNAR.[L]	P05784 [143-151]	3.09993e+08	26.59
	NHEEEVQGLEAQIASSGLTVEVDAPK		1	1	2	P05784	0	2750.35	917.45			3.399e-15	4.49	[K].NHEEEVQGLEAQIASSGLTVEVDAPK.[S]	P05784 [209-234]	3.6669e+06	38.68
	NQNINLENSLGDVEAR		1	1	9	P05784	0	1785.87	893.437			5.595e-09	4.05	[K].NQNINLENSLGDVEAR.[Y]	P05784 [308-323]	126453996	31.46
	NREELDKYWSQQIEESTTVVTTK		1	1	3	P05784	2	2784.37	928.793			7.836e-14	4.97	[K].NREELDKYWSQQIEESTTVVTTK.[S]	P05784 [256-278]	3.40822e+06	35.15
	QAQEYEALLNIK		1	1	3	P05784	0	1419.75	710.377			2.874e-06	3.42	[R].QAQEYEALLNIK.[V]	P05784 [352-363]	5.21514e+07	34.56
	QSVESDIHGLR		1	1	2	P05784	0	1240.63	414.214			2.491e-06	3.14	[R].QSVESDIHGLR.[K]	P05784 [169-179]	37267744	21.05
	QSVESDIHGLRK		1	1	4	P05784	1	1368.72	456.912			5.239e-06	3.1	[R].QSVESDIHGLRK.[V]	P05784 [169-180]	51422005	18.13
	RLLEDGEDFSLNDALDSSNSMQTVQK		1	1	1	P05784	1	2912.36	971.459			1.865e-11	4.15	[R].RLLEDGEDFSLNDALDSSNSMQTVQK.[T]	P05784 [375-400]	1.37777e+06	36.66
	RLLEDGEDFSLNDALDSSNSMQTVQK	1xOxidation [M21]	1	1	2	P05784	1	2928.35	976.789			4.713e-16	7.88	[R].RLLEDGEDFSLNDALDSSNSMQTVQK.[T]	P05784 [375-400]	5.39011e+06	34.77
	RTLQTLEIDLDSMK	1xOxidation [M13]	1	1	3	P05784	1	1678.87	560.294			1.922e-05	3.33	[R].RTLQTLEIDLDSMK.[N]	P05784 [294-307]	1.15336e+06	30.27
	SAEIRDAETTLTELR		1	1	2	P05784	1	1704.88	852.94			2.19e-08	3.15	[K].SAEIRDAETTLTELR.[R]	P05784 [279-293]	2.42501e+07	30.71
	SAEIRDAETTLTELRR		1	1	5	P05784	2	1860.98	620.997			2.035e-08	2.7	[K].SAEIRDAETTLTELRR.[T]	P05784 [279-294]	9.285e+07	28.7
	SLETENR		1	1	2	P05784	0	848.411	424.708			0.02318	1.68	[K].SLETENR.[R]	P05784 [92-98]	10148003	8.67
	STTFSTNYR		1	1	3	P05784	0	1076.5	538.753			0.01482	1.35	[R].STTFSTNYR.[S]	P05784 [7-15]	1.43987e+08	19.48
	SVWGGSVGSAGLAGMGGIQTEK		1	1	1	P05784	0	2049.01	1025.01			2.948e-06	1.41	[R].SVWGGSVGSAGLAGMGGIQTEK.[E]	P05784 [52-73]
	SVWGGSVGSAGLAGMGGIQTEK	1xOxidation [M15]	1	1	1	P05784	0	2065	1033			4.798e-10	3.38	[R].SVWGGSVGSAGLAGMGGIQTEK.[E]	P05784 [52-73]
	SVWGGSVGSAGLAGMGGIQTEKETMQDLNDR	2xOxidation [M15; M25]	1	1	1	P05784	1	3183.47	1061.82			0.002868	1.19	[R].SVWGGSVGSAGLAGMGGIQTEKETMQDLNDR.[L]	P05784 [52-82]
	TLQTLEIDLDSMK	1xOxidation [M12]	1	1	6	P05784	0	1522.77	761.886			5.007e-07	3.2	[R].TLQTLEIDLDSMK.[N]	P05784 [295-307]	7.65993e+07	34.26
	VKLEAEIATYR		1	1	1	P05784	1	1292.72	646.864			3.522e-05	2.21	[K].VKLEAEIATYR.[R]	P05784 [364-374]	19842206	26.16
	VKLEAEIATYRR		1	1	3	P05784	2	1448.82	483.611			1.479e-05	2.59	[K].VKLEAEIATYRR.[L]	P05784 [364-375]	1.46398e+07	23.66
	VKYETELAMR		1	1	3	P05784	1	1239.64	620.324			6.52e-05	2.4	[R].VKYETELAMR.[Q]	P05784 [159-168]	100225000	22.39
	VKYETELAMR	1xOxidation [M9]	1	1	5	P05784	1	1255.64	628.32			0.001468	2.55	[R].VKYETELAMR.[Q]	P05784 [159-168]	1.23284e+08	18.84
	VRPASSAASVYAGAGGSGSR		1	1	9	P05784	0	1807.9	904.454			1.131e-14	2.38	[R].VRPASSAASVYAGAGGSGSR.[I]	P05784 [27-46]	2.04864e+08	18.66
	VVDDTNITR		1	1	3	P05784	0	1032.53	516.769			0.0008069	2.41	[K].VVDDTNITR.[L]	P05784 [181-189]	1.69641e+08	16.55
	VVSETNDTR		1	1	3	P05784	0	1020.5	510.751			0.001163	2.34	[R].VVSETNDTR.[V]	P05784 [411-419]	10099572	7.8
	YETELAMR		1	1	1	P05784	0	1012.48	506.741			0.03198	1.32	[K].YETELAMR.[Q]	P05784 [161-168]	10357157	22.58
	YETELAMR	1xOxidation [M7]	1	1	2	P05784	0	1028.47	514.739			0.009301	1.37	[K].YETELAMR.[Q]	P05784 [161-168]	8.47003e+06	17.76
	LASYLDK		2	5	2	P08730; P05784	0	809.44	405.223			0.03225	1.72	[R].LASYLDK.[V]	P08730 [107-113]; P05784 [83-89]	127958456	19.5
	LAADDFR		6	17	2	Q9Z2K1; Q6IFX2; P08730; P05784; P02535; Q61781	0	807.4	404.204			0.04489	1.98	[RK].LAADDFR.[TLVMS]	Q9Z2K1 [193-199]; Q6IFX2 [174-180]; P08730 [177-183]; P05784 [152-158]; P02535 [227-233]; Q61781 [201-207]	3715602	18.15
Q8BFZ3	Beta-actin-like protein 2 OS=Mus musculus OX=10090 GN=Actbl2 PE=1 SV=1	246.86	38	13	160	2	376	42	5.49
	Sequence	Modifications	# Protein Groups	# Proteins	# PSMs	Master Protein Accessions	# Missed Cleavages	Theo. MH+ [Da]	m/z [Da] (by Search Engine): Sequest HT			Percolator PEP (by Search Engine): Sequest HT	XCorr (by Search Engine): Sequest HT	Annotated Sequence	Positions in Master Proteins	Abundance: F5: Sample	Top Apex RT [min]
	GIHETTFNSIMK		1	1	2	Q8BFZ3	0	1377.68	459.898			0.01758	1.54	[R].GIHETTFNSIMK.[C]	Q8BFZ3 [274-285]	948350	26.06
	GIHETTFNSIMK	1xOxidation [M11]	1	1	2	Q8BFZ3	0	1393.68	465.228			0.04669	1.76	[R].GIHETTFNSIMK.[C]	Q8BFZ3 [274-285]	1.2126e+06	21.02
	VAPDEHPILLTEAPLNPK		1	1	2	Q8BFZ3	0	1954.06	652.027			0.01624	0.98	[R].VAPDEHPILLTEAPLNPK.[I]	Q8BFZ3 [97-114]	1.22977e+06	38.53
	CDVDIRK	1xCarbamidomethyl [C1]	3	3	1	Q8BFZ3; P60710; P63260	1	905.451	302.488			0.0009742	2.2	[K].CDVDIRK.[D]	Q8BFZ3 [286-292]; P60710 [285-291]; P63260 [285-291]	3.2306e+06	12.4
	TTGIVMDSGDGVTHTVPIYEGYALPHAILR		3	3	9	Q8BFZ3; P60710; P63260	0	3183.61	1061.87			3.942e-13	3.97	[R].TTGIVMDSGDGVTHTVPIYEGYALPHAILR.[L]	Q8BFZ3 [149-178]; P60710 [148-177]; P63260 [148-177]	6.88742e+07	40.52
	TTGIVMDSGDGVTHTVPIYEGYALPHAILR	1xOxidation [M6]	3	3	22	Q8BFZ3; P60710; P63260	0	3199.61	1067.21			8.41324e-21	7.66	[R].TTGIVMDSGDGVTHTVPIYEGYALPHAILR.[L]	Q8BFZ3 [149-178]; P60710 [148-177]; P63260 [148-177]	3.41297e+08	38.87
	DLTDYLMK		4	7	6	Q8BFZ3; P60710; P68033; P63260	0	998.486	499.747			0.009442	1.65	[R].DLTDYLMK.[I]	Q8BFZ3 [185-192]; P60710 [184-191]; P68033 [186-193]; P63260 [184-191]	2.74753e+08	35.3
	DLTDYLMK	1xOxidation [M7]	4	7	21	Q8BFZ3; P60710; P68033; P63260	0	1014.48	507.744			0.0174	1.12	[R].DLTDYLMK.[I]	Q8BFZ3 [185-192]; P60710 [184-191]; P68033 [186-193]; P63260 [184-191]	7.20279e+08	30.5
	HQGVMVGMGQK		4	7	6	Q8BFZ3; P60710; P68033; P63260	0	1171.57	586.287			2.952e-09	3.64	[R].HQGVMVGMGQK.[D]	Q8BFZ3 [41-51]; P60710 [40-50]; P68033 [42-52]; P63260 [40-50]	170095124	17.14
	HQGVMVGMGQK	1xOxidation [M]	4	7	30	Q8BFZ3; P60710; P68033; P63260	0	1187.57	594.286			9.136e-09	3.45	[R].HQGVMVGMGQK.[D]	Q8BFZ3 [41-51]; P60710 [40-50]; P68033 [42-52]; P63260 [40-50]	2.24948e+08	14.4
	HQGVMVGMGQK	2xOxidation [M5; M8]	4	7	17	Q8BFZ3; P60710; P68033; P63260	0	1203.56	602.283			3.04e-07	2.16	[R].HQGVMVGMGQK.[D]	Q8BFZ3 [41-51]; P60710 [40-50]; P68033 [42-52]; P63260 [40-50]	5.84702e+07	9.48
	LDLAGRDLTDYLMK		4	7	2	Q8BFZ3; P60710; P68033; P63260	1	1623.84	541.951			0.0004826	1.93	[R].LDLAGRDLTDYLMK.[I]	Q8BFZ3 [179-192]; P60710 [178-191]; P68033 [180-193]; P63260 [178-191]	2.48174e+06	38.75
	LDLAGRDLTDYLMK	1xOxidation [M13]	4	7	2	Q8BFZ3; P60710; P68033; P63260	1	1639.84	820.425			5.902e-05	2.99	[R].LDLAGRDLTDYLMK.[I]	Q8BFZ3 [179-192]; P60710 [178-191]; P68033 [180-193]; P63260 [178-191]	1.65891e+07	35.71
	IKIIAPPER		4	7	2	Q8BFZ3; P60710; P68033; P63260	1	1036.65	346.221			0.002168	2.51	[K].IKIIAPPER.[K]	Q8BFZ3 [328-336]; P60710 [327-335]; P68033 [329-337]; P63260 [327-335]	71568298	22.7
	IKIIAPPERK		4	7	4	Q8BFZ3; P60710; P68033; P63260	2	1164.75	388.919			8.8e-08	2.56	[K].IKIIAPPERK.[Y]	Q8BFZ3 [328-337]; P60710 [327-336]; P68033 [329-338]; P63260 [327-336]	3.36945e+07	19.29
	IIAPPER		4	7	8	Q8BFZ3; P60710; P68033; P63260	0	795.472	398.239			0.05729	1.27	[K].IIAPPER.[K]	Q8BFZ3 [330-336]; P60710 [329-335]; P68033 [331-337]; P63260 [329-335]	622892732	18.57
	IIAPPERK		4	7	2	Q8BFZ3; P60710; P68033; P63260	1	923.567	308.527			0.0001121	2.32	[K].IIAPPERK.[Y]	Q8BFZ3 [330-337]; P60710 [329-336]; P68033 [331-338]; P63260 [329-336]	228626944	14.98
	SYELPDGQVITIGNER		4	7	21	Q8BFZ3; P60710; P68033; P63260	0	1790.89	895.947			7.243e-09	3.39	[RK].SYELPDGQVITIGNER.[F]	Q8BFZ3 [240-255]; P60710 [239-254]; P68033 [241-256]; P63260 [239-254]	6.18315e+08	36.43
	YSVWIGGSILASLSTFQQMWISK	1xOxidation [M19]	4	5	1	Q8BFZ3; P60710; P68033; P63260	0	2618.33	873.448			0.02127	1.07	[K].YSVWIGGSILASLSTFQQMWISK.[Q]	Q8BFZ3 [338-360]; P60710 [337-359]; P68033 [339-361]; P63260 [337-359]	90499.6	53.48
Q8C196	Carbamoyl-phosphate synthase [ammonia], mitochondrial OS=Mus musculus OX=10090 GN=Cps1 PE=1 SV=2	239.08	43	60	117	60	1500	164.5	6.92
	Sequence	Modifications	# Protein Groups	# Proteins	# PSMs	Master Protein Accessions	# Missed Cleavages	Theo. MH+ [Da]	m/z [Da] (by Search Engine): Sequest HT			Percolator PEP (by Search Engine): Sequest HT	XCorr (by Search Engine): Sequest HT	Annotated Sequence	Positions in Master Proteins	Abundance: F5: Sample	Top Apex RT [min]
	AADTIGYPVMIR		1	1	1	Q8C196	0	1306.68	653.843			0.0001203	2.62	[K].AADTIGYPVMIR.[S]	Q8C196 [576-587]	8883526	33.26
	AADTIGYPVMIR	1xOxidation [M10]	1	1	1	Q8C196	0	1322.68	661.845			0.0006648	2.11	[K].AADTIGYPVMIR.[S]	Q8C196 [576-587]	10981917	30.16
	AFAISGPFNVQFLVK		1	1	1	Q8C196	0	1637.9	819.455			0.001113	1.38	[K].AFAISGPFNVQFLVK.[G]	Q8C196 [1233-1247]	651402	47.45
	AKEIGFSDK		1	1	2	Q8C196	1	994.52	497.764			0.002701	2.15	[K].AKEIGFSDK.[Q]	Q8C196 [907-915]	1.94218e+06	15.53
	ALENNMSLDEIVR		1	1	1	Q8C196	0	1503.75	752.373			1.087e-06	3.64	[K].ALENNMSLDEIVR.[L]	Q8C196 [857-869]	3.9606e+06	34.22
	ALENNMSLDEIVR	1xOxidation [M6]	1	1	2	Q8C196	0	1519.74	760.376			6.751e-06	3.38	[K].ALENNMSLDEIVR.[L]	Q8C196 [857-869]	5.073e+06	29.55
	AMLSTGFK	1xOxidation [M2]	1	2	1	Q8C196	0	870.439	435.722			0.07859	1.55	[K].AMLSTGFK.[I]	Q8C196 [1349-1356]	1.63222e+06	19.64
	APMFSWPR	1xOxidation [M3]	1	1	2	Q8C196	0	1007.48	504.241			0.04911	1.19	[K].APMFSWPR.[L]	Q8C196 [1310-1317]	603800	30.76
	ATGYPLAFIAAK		1	1	2	Q8C196	0	1222.68	611.847			3.245e-05	2.45	[K].ATGYPLAFIAAK.[I]	Q8C196 [729-740]	17928816	37.28
	CLGLTEAQTR	1xCarbamidomethyl [C1]	1	1	1	Q8C196	0	1148.57	574.789			0.0003581	2.19	[K].CLGLTEAQTR.[E]	Q8C196 [920-929]	1.23414e+06	21.63
	DELGLNKYMESDGIK	1xOxidation [M9]	1	1	2	Q8C196	1	1727.82	864.408			0.001661	1.8	[R].DELGLNKYMESDGIK.[V]	Q8C196 [113-127]	587952	27.06
	DGSIDLVINLPNNNTK		1	1	1	Q8C196	0	1726.9	863.952			1.818e-09	3.64	[R].DGSIDLVINLPNNNTK.[F]	Q8C196 [1429-1444]	1.21452e+06	38.04
	EIEYEVVR		1	2	1	Q8C196	0	1036.53	518.768			0.05969	1.8	[K].EIEYEVVR.[D]	Q8C196 [631-638]	8729016	24.4
	ELSEPSSTR		1	1	1	Q8C196	0	1005.48	503.245			0.04837	1.69	[K].ELSEPSSTR.[I]	Q8C196 [842-850]	6.76463e+06	13.35
	EPLFGISTGNIITGLAAGAK		1	1	2	Q8C196	0	1930.06	965.537			0.0003243	1.72	[K].EPLFGISTGNIITGLAAGAK.[S]	Q8C196 [288-307]	1.34054e+06	46.46
	ETLIDLGTK		1	1	1	Q8C196	0	989.551	495.278			0.0006785	2.49	[K].ETLIDLGTK.[A]	Q8C196 [604-612]	4630727	29.08
	EVEMDAVGK		1	1	1	Q8C196	0	977.461	489.232			0.008431	2.26	[R].EVEMDAVGK.[E]	Q8C196 [1175-1183]	4.62395e+06	18.65
	EVEMDAVGK	1xOxidation [M4]	1	1	1	Q8C196	0	993.456	497.231			0.006326	1.93	[R].EVEMDAVGK.[E]	Q8C196 [1175-1183]	1877585	11.78
	EVEMDAVGKEGR		1	1	2	Q8C196	1	1319.63	440.546			4.727e-05	2.8	[R].EVEMDAVGKEGR.[V]	Q8C196 [1175-1186]	1.54245e+06	17.85
	EVEMDAVGKEGR	1xOxidation [M4]	1	1	1	Q8C196	1	1335.62	668.314			2.734e-05	2.06	[R].EVEMDAVGKEGR.[V]	Q8C196 [1175-1186]	328259	12.55
	FLGVAEQLHNEGFK		1	1	2	Q8C196	0	1588.81	530.274			1.505e-07	2.18	[R].FLGVAEQLHNEGFK.[L]	Q8C196 [1374-1387]	12531192	31.65
	FVHDNYVIR		1	1	2	Q8C196	0	1162.6	388.204			0.0005838	3.59	[K].FVHDNYVIR.[R]	Q8C196 [1445-1453]	2.30572e+07	21.94
	FVHDNYVIRR		1	1	2	Q8C196	1	1318.7	330.43			0.00841	1.65	[K].FVHDNYVIRR.[T]	Q8C196 [1445-1454]	1.32512e+06	19.18
	GKGTTITSVLPKPALVASR		1	1	2	Q8C196	1	1896.13	474.786			2.716e-06	1.99	[K].GKGTTITSVLPKPALVASR.[V]	Q8C196 [401-419]	1.78909e+06	30.44
	GILIGIQQSFRPR		1	1	2	Q8C196	0	1484.87	495.627			4.518e-05	2.01	[K].GILIGIQQSFRPR.[F]	Q8C196 [1361-1373]	3.87079e+06	33.86
	GLNSDSVTEETLR		1	1	2	Q8C196	0	1420.69	710.848			4.104e-06	2.98	[K].GLNSDSVTEETLR.[K]	Q8C196 [893-905]	1.34673e+07	24.51
	GLNSDSVTEETLRK		1	1	1	Q8C196	1	1548.79	774.896			4.082e-07	3.62	[K].GLNSDSVTEETLRK.[A]	Q8C196 [893-906]	3.86553e+06	21.53
	GQILTMANPIIGNGGAPDTTAR		1	1	1	Q8C196	0	2168.11	723.379			0.007313	2.02	[K].GQILTMANPIIGNGGAPDTTAR.[D]	Q8C196 [91-112]
	GQILTMANPIIGNGGAPDTTAR	1xOxidation [M6]	1	1	2	Q8C196	0	2184.11	728.708			4.553e-08	3.1	[K].GQILTMANPIIGNGGAPDTTAR.[D]	Q8C196 [91-112]	522238	32.06
	GQNQPVLNITNR		1	1	1	Q8C196	0	1353.72	677.367			9.544e-06	3.07	[R].GQNQPVLNITNR.[Q]	Q8C196 [317-328]	19470540	24.65
	GTTITSVLPKPALVASR		1	1	4	Q8C196	0	1711.01	571.007			1.111e-08	3.37	[K].GTTITSVLPKPALVASR.[V]	Q8C196 [403-419]	8.58366e+06	33.73
	GVLKEYGVK		1	1	2	Q8C196	1	992.578	496.792			0.0005781	2.54	[R].GVLKEYGVK.[V]	Q8C196 [524-532]	4.7133e+06	19.42
	KEPLFGISTGNIITGLAAGAK		1	1	1	Q8C196	1	2058.16	686.724			8.197e-05	2.29	[R].KEPLFGISTGNIITGLAAGAK.[S]	Q8C196 [287-307]	583307	41.76
	KILESDRK		1	1	1	Q8C196	2	988.579	330.197			0.05849	1.14	[K].KILESDRK.[E]	Q8C196 [280-287]	735854	7.1
	IALGIPLPEIK		1	1	1	Q8C196	0	1163.74	582.373			3.148e-06	2.98	[K].IALGIPLPEIK.[N]	Q8C196 [741-751]	11024752	42.71
	IAPSFAVESMEDALK		1	1	3	Q8C196	0	1607.8	804.402			1.282e-06	3.01	[K].IAPSFAVESMEDALK.[A]	Q8C196 [561-575]	6.36762e+06	41.01
	IAPSFAVESMEDALK	1xOxidation [M10]	1	1	1	Q8C196	0	1623.79	812.397			0.001261	1.87	[K].IAPSFAVESMEDALK.[A]	Q8C196 [561-575]	6.07582e+06	31.43
	IMGTSPLQIDR	1xOxidation [M2]	1	1	1	Q8C196	0	1246.65	623.825			6.388e-05	3	[K].IMGTSPLQIDR.[A]	Q8C196 [1075-1085]	14133973	25.54
	IMGTSPLQIDRAEDR		1	1	1	Q8C196	1	1701.86	567.955			0.0002737	1.64	[K].IMGTSPLQIDRAEDR.[S]	Q8C196 [1075-1089]	505700	26.86
	IMGTSPLQIDRAEDR	1xOxidation [M2]	1	1	1	Q8C196	1	1717.85	573.288			0.0001038	2.32	[K].IMGTSPLQIDRAEDR.[S]	Q8C196 [1075-1089]	1.02384e+06	23.96
	LNEINEK		1	1	1	Q8C196	0	859.452	430.229			0.03657	1.67	[K].LNEINEK.[I]	Q8C196 [554-560]	573506	12.78
	LPTLEQPIIPSDYVAIK		1	1	1	Q8C196	0	1897.07	949.034			2.477e-06	2.78	[R].LPTLEQPIIPSDYVAIK.[A]	Q8C196 [1293-1309]	978086	42.36
	LRDADPILR		1	1	2	Q8C196	1	1068.62	534.811			0.008896	2.95	[R].LRDADPILR.[C]	Q8C196 [1318-1326]	1.26355e+07	20.79
	LTSIDKWFLYK		1	1	2	Q8C196	1	1413.78	707.394			0.01067	0.97	[R].LTSIDKWFLYK.[M]	Q8C196 [870-880]	1.22855e+06	37.42
	LYFEELSLER		1	1	1	Q8C196	0	1298.66	649.836			0.0018	1.43	[K].LYFEELSLER.[I]	Q8C196 [1030-1039]	250322	37.57
	MCHPSVDGFTPR	1xCarbamidomethyl [C2]	1	1	1	Q8C196	0	1403.62	468.546			0.001495	1.22	[R].MCHPSVDGFTPR.[L]	Q8C196 [815-826]	612780	23.93
	MCHPSVDGFTPR	1xCarbamidomethyl [C2]; 1xOxidation [M1]	1	1	2	Q8C196	0	1419.61	473.874			4.894e-05	2.33	[R].MCHPSVDGFTPR.[L]	Q8C196 [815-826]	1.32616e+06	21.6
	MRDILNMDK		1	1	2	Q8C196	1	1135.56	568.284			0.01634	2.17	[K].MRDILNMDK.[T]	Q8C196 [881-889]	1.47112e+06	24.67
	MRDILNMDK	1xOxidation [M1]	1	1	2	Q8C196	1	1151.55	576.28			0.001164	2.27	[K].MRDILNMDK.[T]	Q8C196 [881-889]	1.83266e+06	21.13
	QADAVYFLPITPQFVTEVIK		1	1	2	Q8C196	0	2279.23	1140.12			0.00868	1.41	[K].QADAVYFLPITPQFVTEVIK.[A]	Q8C196 [478-497]	575365	51.93
	QLFSDKLNEINEK		1	1	4	Q8C196	1	1577.82	526.61			5.588e-07	3.82	[R].QLFSDKLNEINEK.[I]	Q8C196 [548-560]	5.58126e+06	28.11
	RLPTLEQPIIPSDYVAIK		1	1	2	Q8C196	1	2053.17	1027.09			5.01e-10	3.85	[K].RLPTLEQPIIPSDYVAIK.[A]	Q8C196 [1292-1309]	9.61618e+06	39.12
	SAYALGGLGSGICPNK	1xCarbamidomethyl [C13]	1	1	1	Q8C196	0	1564.78	782.892			5.8e-09	3.75	[R].SAYALGGLGSGICPNK.[E]	Q8C196 [588-603]	1.94781e+06	31.33
	SAYALGGLGSGICPNKETLIDLGTK	1xCarbamidomethyl [C13]	1	1	1	Q8C196	1	2535.31	845.772			2.48e-11	3.89	[R].SAYALGGLGSGICPNKETLIDLGTK.[A]	Q8C196 [588-612]	1.97121e+06	38.95
	SVGEVMAIGR		1	1	1	Q8C196	0	1018.53	509.771			0.0001937	2.72	[K].SVGEVMAIGR.[T]	Q8C196 [794-803]	9168136	25.96
	SVGEVMAIGR	1xOxidation [M6]	1	1	2	Q8C196	0	1034.53	517.768			0.000521	2.15	[K].SVGEVMAIGR.[T]	Q8C196 [794-803]	12515719	20.2
	TAHIVLEDGTK		1	1	3	Q8C196	0	1183.63	592.319			0.0004713	2.05	[K].TAHIVLEDGTK.[M]	Q8C196 [45-55]	1.44615e+07	18.64
	TAVDSGIALLTNFQVTK		1	1	2	Q8C196	0	1777.97	889.489			7.418e-13	4	[R].TAVDSGIALLTNFQVTK.[L]	Q8C196 [1455-1471]	1.85654e+06	43.94
	TFEESFQK		1	1	1	Q8C196	0	1015.47	508.24			0.007928	1.93	[R].TFEESFQK.[A]	Q8C196 [804-811]	18670088	21.44
	TLGVDFIDVATK		1	1	1	Q8C196	0	1278.69	639.849			5.67e-06	2.49	[K].TLGVDFIDVATK.[V]	Q8C196 [1270-1281]	18593410	38.41
	TSACFEPSLDYMVTK	1xCarbamidomethyl [C4]	1	1	1	Q8C196	0	1748.79	874.897			4.951e-08	2.29	[K].TSACFEPSLDYMVTK.[I]	Q8C196 [758-772]	491870	35.65
	TSACFEPSLDYMVTK	1xCarbamidomethyl [C4]; 1xOxidation [M12]	1	1	1	Q8C196	0	1764.78	882.892			2.608e-07	2.73	[K].TSACFEPSLDYMVTK.[I]	Q8C196 [758-772]	1389602	31.71
	TVLMNPNIASVQTNEVGLK		1	1	2	Q8C196	0	2028.08	1014.54			6.821e-11	3.89	[K].TVLMNPNIASVQTNEVGLK.[Q]	Q8C196 [459-477]	2.53851e+06	35.66
	TVLMNPNIASVQTNEVGLK	1xOxidation [M4]	1	1	2	Q8C196	0	2044.07	1022.54			1.155e-11	4.81	[K].TVLMNPNIASVQTNEVGLK.[Q]	Q8C196 [459-477]	5146963	32.72
	VLGTSVESIMATEDR		1	1	1	Q8C196	0	1607.79	804.401			1.613e-09	3.98	[K].VLGTSVESIMATEDR.[Q]	Q8C196 [533-547]	3.19143e+06	33.84
	VLGTSVESIMATEDR	1xOxidation [M10]	1	1	5	Q8C196	0	1623.79	812.399			2.077e-08	4.01	[K].VLGTSVESIMATEDR.[Q]	Q8C196 [533-547]	4.27205e+06	27.47
	VISHAISEHVEDAGVHSGDATLMLPTQTISQGAIEK	1xOxidation [M23]	1	1	2	Q8C196	0	3757.87	940.223			7.699e-17	7.61	[R].VISHAISEHVEDAGVHSGDATLMLPTQTISQGAIEK.[V]	Q8C196 [1187-1222]	4.4882e+06	32.88
	VMIGESIDEK		1	1	1	Q8C196	0	1120.56	560.782			0.001155	2.34	[K].VMIGESIDEK.[R]	Q8C196 [1282-1291]	5009600	23.92
	VMIGESIDEK	1xOxidation [M2]	1	1	1	Q8C196	0	1136.55	568.777			0.0007656	1.96	[K].VMIGESIDEK.[R]	Q8C196 [1282-1291]	9129221	21.7
	VPAIYGVDTR		1	1	1	Q8C196	0	1090.59	545.796			0.0003314	2.12	[K].VPAIYGVDTR.[M]	Q8C196 [158-167]	15105527	26.5
	VSQEHPVVLTK		1	1	2	Q8C196	0	1236.69	412.902			2.764e-05	3.27	[R].VSQEHPVVLTK.[F]	Q8C196 [1158-1168]	24067821	17.34
	VVAVDCGIK	1xCarbamidomethyl [C6]	1	1	1	Q8C196	0	960.518	480.762			0.0005342	2.57	[K].VVAVDCGIK.[N]	Q8C196 [220-228]	4.73959e+06	20.27
	WDLDRFHGTSSR		1	1	2	Q8C196	1	1476.7	492.903			0.000809	2.45	[R].WDLDRFHGTSSR.[I]	Q8C196 [776-787]	1.80286e+06	24.53
	YMESDGIK	1xOxidation [M2]	1	1	1	Q8C196	0	958.419	479.713			0.003784	1.66	[K].YMESDGIK.[V]	Q8C196 [120-127]	1.33618e+06	13.51
P63017	Heat shock cognate 71 kDa protein OS=Mus musculus OX=10090 GN=Hspa8 PE=1 SV=1	236.92	61	38	106	33	646	70.8	5.52
	Sequence	Modifications	# Protein Groups	# Proteins	# PSMs	Master Protein Accessions	# Missed Cleavages	Theo. MH+ [Da]	m/z [Da] (by Search Engine): Sequest HT			Percolator PEP (by Search Engine): Sequest HT	XCorr (by Search Engine): Sequest HT	Annotated Sequence	Positions in Master Proteins	Abundance: F5: Sample	Top Apex RT [min]
	IINEPTAAAIAYGLDK		3	4	5	P20029; P63017; P16627	0	1659.9	553.969			5.058e-08	3.43	[R].IINEPTAAAIAYGLDK.[RKG]	P20029 [199-214]; P63017 [172-187]; P16627 [174-189]	16747504	36.03
	VEIIANDQGNR		4	6	1	P20029; Q61696; P63017; P16627	0	1228.63	614.818			3.359e-05	2.65	[RK].VEIIANDQGNR.[IT]	P20029 [51-61]; Q61696 [26-36]; P63017 [26-36]; P16627 [28-38]	28137458	19.44
	ARFEELNADLFR		1	2	2	P63017	1	1480.75	740.88			5.13e-09	2.42	[R].ARFEELNADLFR.[G]	P63017 [300-311]	43544278	33.7
	ATVEDEKLQGK		1	1	2	P63017	1	1217.64	406.549			3.413e-07	3.19	[K].ATVEDEKLQGK.[I]	P63017 [551-561]	1.49304e+06	13.62
	DAGTIAGLNVLR		1	1	2	P63017	0	1199.67	600.339			9.764e-05	2.44	[K].DAGTIAGLNVLR.[I]	P63017 [160-171]	79150768	35.1
	DNNLLGKFELTGIPPAPR		1	1	3	P63017	1	1952.06	976.533			1.682e-06	2.33	[K].DNNLLGKFELTGIPPAPR.[G]	P63017 [452-469]	1.41126e+06	41.09
	EIAEAYLGK		1	1	1	P63017	0	993.525	497.265			0.02594	2.13	[K].EIAEAYLGK.[T]	P63017 [129-137]	7602622	24.32
	FDDAVVQSDMK		1	1	1	P63017	0	1254.57	627.787			2.44e-07	2.24	[R].FDDAVVQSDMK.[H]	P63017 [78-88]	2334899	24.72
	FDDAVVQSDMK	1xOxidation [M10]	1	1	1	P63017	0	1270.56	635.783			9.37e-06	3	[R].FDDAVVQSDMK.[H]	P63017 [78-88]	2.46863e+06	20.2
	FEELNADLFR		1	2	1	P63017	0	1253.62	627.31			0.0001559	3.01	[R].FEELNADLFR.[G]	P63017 [302-311]	11989425	36.31
	FELTGIPPAPR		1	1	6	P63017	0	1197.66	599.334			1.354e-05	2.43	[K].FELTGIPPAPR.[G]	P63017 [459-469]	4.76089e+06	33.57
	GPAVGIDLGTTYSCVGVFQHGK	1xCarbamidomethyl [C14]	1	1	1	P63017	0	2263.12	755.041			5.019e-08	2.73	[K].GPAVGIDLGTTYSCVGVFQHGK.[V]	P63017 [4-25]	672586	36.62
	GTLDPVEK		1	1	1	P63017	0	858.457	429.731			0.07972	1.9	[R].GTLDPVEK.[A]	P63017 [312-319]	38791656	17.8
	HWPFMVVNDAGRPK		1	1	1	P63017	0	1653.83	551.948			0.002938	1.75	[K].HWPFMVVNDAGRPK.[V]	P63017 [89-102]	656843	30.67
	HWPFMVVNDAGRPK	1xOxidation [M5]	1	1	2	P63017	0	1669.83	557.28			6.185e-09	3.55	[K].HWPFMVVNDAGRPK.[V]	P63017 [89-102]	1.28637e+06	27.88
	LDKSQIHDIVLVGGSTR		1	1	3	P63017	1	1838.01	613.343			4.157e-13	5.58	[K].LDKSQIHDIVLVGGSTR.[I]	P63017 [326-342]	1.79978e+07	28.22
	IINEPTAAAIAYGLDKK		1	2	3	P63017	1	1787.99	596.666			1.081e-12	4.94	[R].IINEPTAAAIAYGLDKK.[VG]	P63017 [172-188]	5.87976e+07	32.94
	LLQDFFNGK		1	2	1	P63017	0	1081.57	541.284			0.01145	2.21	[K].LLQDFFNGK.[E]	P63017 [349-357]	17437104	34.45
	LLQDFFNGKELNK		1	2	2	P63017	1	1565.83	783.42			2.275e-06	3.04	[K].LLQDFFNGKELNK.[S]	P63017 [349-361]	3.98286e+06	33.86
	LSKEDIER		1	1	2	P63017	1	989.526	495.265			0.004015	1.86	[R].LSKEDIER.[M]	P63017 [510-517]	39845016	14.39
	LYQSAGGMPGGMPGGFPGGGAPPSGGASSGPTIEEVD	1xOxidation [M]	1	1	2	P63017	0	3362.49	1121.5			0.002183	1.12	[K].LYQSAGGMPGGMPGGFPGGGAPPSGGASSGPTIEEVD.[-]	P63017 [610-646]	982792	37.72
	LYQSAGGMPGGMPGGFPGGGAPPSGGASSGPTIEEVD	2xOxidation [M8; M12]	1	1	2	P63017	0	3378.49	1126.84			0.0003257	2.22	[K].LYQSAGGMPGGMPGGFPGGGAPPSGGASSGPTIEEVD.[-]	P63017 [610-646]	1.47755e+06	34.79
	MKEIAEAYLGK		1	1	2	P63017	1	1252.66	626.833			4.266e-06	3.15	[K].MKEIAEAYLGK.[T]	P63017 [127-137]	15494153	24.91
	MKEIAEAYLGK	1xOxidation [M1]	1	1	2	P63017	1	1268.66	634.828			2.962e-06	3.73	[K].MKEIAEAYLGK.[T]	P63017 [127-137]	22957697	22.07
	MVNHFIAEFK		1	1	2	P63017	0	1235.62	618.315			1.126e-05	3.65	[R].MVNHFIAEFK.[R]	P63017 [237-246]	10066681	28.98
	MVNHFIAEFK	1xOxidation [M1]	1	1	2	P63017	0	1251.62	626.316			6.268e-06	3.93	[R].MVNHFIAEFK.[R]	P63017 [237-246]	21105245	26.85
	MVNHFIAEFKR		1	1	2	P63017	1	1391.73	464.579			9.024e-07	3.2	[R].MVNHFIAEFKR.[K]	P63017 [237-247]	3.54251e+06	26.01
	MVNHFIAEFKR	1xOxidation [M1]	1	1	3	P63017	1	1407.72	469.911			8.303e-06	3.35	[R].MVNHFIAEFKR.[K]	P63017 [237-247]	6.75794e+06	24.05
	MVQEAEK		1	1	1	P63017	0	834.403	417.704			0.0422	1.11	[R].MVQEAEK.[Y]	P63017 [518-524]	435216	7.84
	MVQEAEKYK		1	1	2	P63017	1	1125.56	563.28			0.007123	1.84	[R].MVQEAEKYK.[A]	P63017 [518-526]	107049	13.55
	NQTAEKEEFEHQQK		1	1	1	P63017	1	1745.81	582.607			4.214e-06	2.01	[K].NQTAEKEEFEHQQK.[E]	P63017 [584-597]	762967	12.1
	NQVAMNPTNTVFDAK		1	1	1	P63017	0	1649.8	825.402			1.192e-09	2.83	[K].NQVAMNPTNTVFDAK.[R]	P63017 [57-71]	10066975	29.26
	NQVAMNPTNTVFDAK	1xOxidation [M5]	1	1	2	P63017	0	1665.79	833.402			9.98e-09	4.12	[K].NQVAMNPTNTVFDAK.[R]	P63017 [57-71]	16162068	25.28
	NQVAMNPTNTVFDAKR		1	1	3	P63017	1	1805.9	602.635			1.224e-10	3.71	[K].NQVAMNPTNTVFDAKR.[L]	P63017 [57-72]	6.44003e+06	26.36
	NQVAMNPTNTVFDAKR	1xOxidation [M5]	1	1	1	P63017	1	1821.89	911.447			6.053e-10	3.7	[K].NQVAMNPTNTVFDAKR.[L]	P63017 [57-72]	1.17396e+06	22.71
	NSLESYAFNMK		1	1	1	P63017	0	1303.6	652.307			0.003622	2.22	[K].NSLESYAFNMK.[A]	P63017 [540-550]	11783885	31.81
	NSLESYAFNMK	1xOxidation [M10]	1	1	1	P63017	0	1319.59	660.298			0.0001771	3.55	[K].NSLESYAFNMK.[A]	P63017 [540-550]	26554378	27.16
	RFDDAVVQSDMK		1	1	2	P63017	1	1410.67	705.837			1.836e-07	3.45	[R].RFDDAVVQSDMK.[H]	P63017 [77-88]	1.15378e+07	22.76
	RFDDAVVQSDMK	1xOxidation [M11]	1	1	2	P63017	1	1426.66	713.833			1.238e-06	3.25	[R].RFDDAVVQSDMK.[H]	P63017 [77-88]	1.11097e+07	18.8
	SFYPEEVSSMVLTK		1	1	2	P63017	0	1616.79	808.898			9.283e-07	2.71	[K].SFYPEEVSSMVLTK.[M]	P63017 [113-126]	6.49013e+06	38.38
	SFYPEEVSSMVLTK	1xOxidation [M10]	1	1	6	P63017	0	1632.78	816.894			6.806e-06	2.4	[K].SFYPEEVSSMVLTK.[M]	P63017 [113-126]	1.80928e+07	33.72
	SQIHDIVLVGGSTR		1	1	1	P63017	0	1481.81	494.606			6.41e-06	3.2	[K].SQIHDIVLVGGSTR.[I]	P63017 [329-342]	16814916	26.5
	STAGDTHLGGEDFDNR		1	2	4	P63017	0	1691.73	564.579			2.158e-06	2.57	[K].STAGDTHLGGEDFDNR.[M]	P63017 [221-236]	47488253	20.21
	TVTNAVVTVPAYFNDSQR		1	1	8	P63017	0	1982	991.5			2.489e-10	3.48	[K].TVTNAVVTVPAYFNDSQR.[Q]	P63017 [138-155]	3.37232e+07	35.35
	VCNPIITK	1xCarbamidomethyl [C2]	1	1	1	P63017	0	944.523	472.765			0.01487	1.98	[K].VCNPIITK.[L]	P63017 [602-609]	5.70785e+06	20.66
	VQVEYKGETK		1	1	1	P63017	1	1180.62	590.814			6.725e-05	2.64	[K].VQVEYKGETK.[S]	P63017 [103-112]	9904641	14.34
	QTQTFTTYSDNQPGVLIQVYEGER		2	3	1	Q61696; P63017	0	2774.33	925.447			4.002e-07	4.39	[K].QTQTFTTYSDNQPGVLIQVYEGER.[A]	Q61696 [424-447]; P63017 [424-447]	2.84416e+06	39.16
	ITITNDKGR		3	5	3	Q61696; P63017; P16627	1	1017.57	339.86			0.0001084	2.74	[K].ITITNDKGR.[L]	Q61696 [501-509]; P63017 [501-509]; P16627 [503-511]	1.71913e+07	12.72
	TTPSYVAFTDTER		3	5	4	Q61696; P63017; P16627	0	1487.7	744.353			1.498e-05	2.29	[R].TTPSYVAFTDTER.[L]	Q61696 [37-49]; P63017 [37-49]; P16627 [39-51]	6.69877e+07	28.46
P16546	Spectrin alpha chain, non-erythrocytic 1 OS=Mus musculus OX=10090 GN=Sptan1 PE=1 SV=4	221.73	38	86	116	86	2472	284.4	5.33
	Sequence	Modifications	# Protein Groups	# Proteins	# PSMs	Master Protein Accessions	# Missed Cleavages	Theo. MH+ [Da]	m/z [Da] (by Search Engine): Sequest HT			Percolator PEP (by Search Engine): Sequest HT	XCorr (by Search Engine): Sequest HT	Annotated Sequence	Positions in Master Proteins	Abundance: F5: Sample	Top Apex RT [min]
	AINVQEEK		1	1	1	P16546	0	930.489	465.748			0.01668	1.66	[K].AINVQEEK.[I]	P16546 [1493-1500]	710252	14.16
	ALSSEGKPYVTK		1	1	1	P16546	0	1279.69	640.348			0.0005423	1.44	[R].ALSSEGKPYVTK.[E]	P16546 [2415-2426]	221309	16.22
	ALSSEGKPYVTKEELYQNLTR		1	1	2	P16546	1	2426.26	809.425			1.767e-14	3.25	[R].ALSSEGKPYVTKEELYQNLTR.[E]	P16546 [2415-2435]	2.21651e+06	28.89
	AQLADSFHLQQFFR		1	1	3	P16546	0	1707.86	854.433			3.579e-06	2.21	[R].AQLADSFHLQQFFR.[D]	P16546 [567-580]	584778	40.02
	DLAALEDKVK		1	1	2	P16546	1	1101.62	551.311			0.001538	2.42	[R].DLAALEDKVK.[A]	P16546 [303-312]	3.74782e+06	26.62
	DLAALGDKVNSLGETAQR		1	1	1	P16546	1	1857.97	619.993			3.866e-07	4.38	[R].DLAALGDKVNSLGETAQR.[L]	P16546 [1281-1298]
	DLASVQALLR		1	1	1	P16546	0	1085.63	543.317			0.0003688	2.36	[R].DLASVQALLR.[K]	P16546 [286-295]	2.54196e+06	38.33
	DLNSQADSLMTSSAFDTSQVK	1xOxidation [M10]	1	1	1	P16546	0	2261.02	754.346			0.06922	1.1	[K].DLNSQADSLMTSSAFDTSQVK.[E]	P16546 [1716-1736]
	DLSSVQTLLTK		1	1	1	P16546	0	1204.68	602.842			0.0003326	2.68	[R].DLSSVQTLLTK.[Q]	P16546 [2007-2017]	7491101	36
	DVTGAEALLER		1	1	1	P16546	0	1173.61	587.308			0.0003135	2.74	[K].DVTGAEALLER.[H]	P16546 [1370-1380]	2.69931e+06	31.37
	EAFLNTEDKGDSLDSVEALIK		1	1	2	P16546	1	2294.14	765.383			1.272e-07	2.82	[R].EAFLNTEDKGDSLDSVEALIK.[K]	P16546 [1465-1485]	1.15595e+06	40
	EAGSVSLR		1	1	1	P16546	0	818.437	409.72			0.0202	1.95	[K].EAGSVSLR.[M]	P16546 [1058-1065]	608405	15.3
	EAIVTSEELGQDLEHVEVLQK		1	1	1	P16546	0	2366.21	789.41			0.0008499	1.53	[K].EAIVTSEELGQDLEHVEVLQK.[K]	P16546 [169-189]	260653	39.29
	EANQQQQFNR		1	1	1	P16546	0	1262.59	631.795			0.01426	1.21	[R].EANQQQQFNR.[N]	P16546 [676-685]	535652	12.09
	EELYQNLTR		1	1	1	P16546	0	1165.58	583.297			0.0009578	2.44	[K].EELYQNLTR.[E]	P16546 [2427-2435]	943393	25.2
	EKEPIAASTNR		1	1	2	P16546	1	1215.63	608.317			0.007282	1.97	[R].EKEPIAASTNR.[G]	P16546 [802-812]	768469	12.39
	EKEPIVGSTDYGKDEDSAEALLK		1	1	1	P16546	2	2494.22	832.076			1.533e-06	2.11	[R].EKEPIVGSTDYGKDEDSAEALLK.[K]	P16546 [908-930]
	EKEQLMASDDFGR	1xOxidation [M6]	1	1	1	P16546	1	1541.69	514.568			0.01814	0.99	[K].EKEQLMASDDFGR.[D]	P16546 [273-285]	359435	19.75
	EKLDILDQER		1	1	1	P16546	1	1258.66	629.838			0.006686	2.23	[K].EKLDILDQER.[T]	P16546 [1418-1427]	676033	25.26
	ENLLEEQGSIALR		1	1	1	P16546	0	1471.78	736.394			6.14e-07	3.22	[R].ENLLEEQGSIALR.[Q]	P16546 [1033-1045]	892934	33.2
	EQLMASDDFGR	1xOxidation [M4]	1	1	1	P16546	0	1284.55	642.778			0.003153	1.37	[K].EQLMASDDFGR.[D]	P16546 [275-285]
	FKELSTLR		1	1	2	P16546	1	993.573	331.862			0.02927	1.88	[R].FKELSTLR.[R]	P16546 [29-36]	1681864	21.03
	GKDLIGVQNLLK		1	1	2	P16546	1	1297.78	649.394			2.366e-06	3.24	[R].GKDLIGVQNLLK.[K]	P16546 [813-824]	2.03139e+06	32.63
	GLVSSDELAK		1	1	1	P16546	0	1018.54	509.773			0.0008936	2.43	[R].GLVSSDELAK.[D]	P16546 [1360-1369]	2.04967e+06	22.41
	GNAMVEEGHFAAEDVK	1xOxidation [M4]	1	1	2	P16546	0	1719.76	860.385			9.744e-06	1.61	[K].GNAMVEEGHFAAEDVK.[A]	P16546 [847-862]	896211	21.03
	GRELPTAFDYVEFTR		1	1	1	P16546	1	1800.89	600.967			0.0001762	3.17	[K].GRELPTAFDYVEFTR.[S]	P16546 [2453-2467]	631332	36.96
	GVIDMGNSLIER	1xOxidation [M5]	1	1	2	P16546	0	1319.66	660.333			2.372e-05	2.61	[R].GVIDMGNSLIER.[G]	P16546 [1608-1619]	4.13952e+06	27.74
	HALLEADVAAHQDR		1	1	1	P16546	0	1545.78	515.931			2.939e-05	2.71	[K].HALLEADVAAHQDR.[I]	P16546 [720-733]
	HQAFEAELHANADR		1	1	1	P16546	0	1608.75	536.922			1.545e-12	4.55	[K].HQAFEAELHANADR.[I]	P16546 [1592-1605]	1383439	19.79
	HQAFEAELSANQSR		1	1	2	P16546	0	1587.75	794.38			7.466e-07	2.56	[K].HQAFEAELSANQSR.[I]	P16546 [614-627]	1.25383e+06	21.38
	HQAFEAEVQANSGAIVK		1	1	1	P16546	0	1798.91	600.306			7.689e-06	2.18	[K].HQAFEAEVQANSGAIVK.[L]	P16546 [85-101]	363657	25.98
	HQALQAEIAGHEPR		1	1	1	P16546	0	1556.79	519.601			5.273e-07	2.48	[K].HQALQAEIAGHEPR.[I]	P16546 [826-839]	591547	19.95
	HQEHKGEIDAHEDSFK		1	1	2	P16546	1	1906.87	477.472			9.067e-06	2.39	[R].HQEHKGEIDAHEDSFK.[S]	P16546 [403-418]	659824	13.75
	HQLLEADISAHEDR		1	1	1	P16546	0	1633.79	545.268			3.936e-08	3.27	[K].HQLLEADISAHEDR.[L]	P16546 [1700-1713]	730977	21.77
	KFDDFQK		1	1	1	P16546	1	927.457	464.23			0.002494	2.42	[K].KFDDFQK.[D]	P16546 [1132-1138]	1.15114e+06	16.72
	KFEEFQTDLAAHEER		1	1	2	P16546	1	1849.87	617.295			8.116e-12	5.1	[K].KFEEFQTDLAAHEER.[V]	P16546 [190-204]	1.34496e+06	25.34
	KHQALQAEIAGHEPR		1	1	1	P16546	1	1684.89	421.977			0.0002086	1.93	[K].KHQALQAEIAGHEPR.[I]	P16546 [825-839]	426919	18.08
	KKQEALVAR		1	1	1	P16546	2	1042.64	348.216			0.0214	1.15	[K].KKQEALVAR.[Y]	P16546 [757-765]	175568	8.41
	KLDPAQSASR		1	1	1	P16546	1	1072.57	536.789			0.00383	1.77	[K].KLDPAQSASR.[E]	P16546 [1023-1032]	676065	11.23
	KIEDLGAAMEEALILDNK		1	1	1	P16546	1	1973.03	658.347			0.0009203	1.48	[K].KIEDLGAAMEEALILDNK.[Y]	P16546 [2264-2281]
	KLLEAQSHFR		1	1	2	P16546	1	1228.68	410.231			0.01286	1.64	[K].KLLEAQSHFR.[K]	P16546 [2078-2087]
	KLLEATELK		1	1	1	P16546	1	1044.63	522.817			0.0009887	2.35	[K].KLLEATELK.[G]	P16546 [662-670]	1.12024e+06	21.68
	KLLVSSEDYGR		1	1	3	P16546	1	1266.67	633.838			3.159e-05	2.76	[K].KLLVSSEDYGR.[D]	P16546 [1784-1794]	1.25938e+06	21.01
	KQEALVAR		1	1	1	P16546	1	914.542	457.774			0.005192	1.98	[K].KQEALVAR.[Y]	P16546 [758-765]	550861	11.31
	KVEDLFLTFAK		1	1	2	P16546	1	1310.74	655.872			2.502e-10	3.23	[R].KVEDLFLTFAK.[K]	P16546 [2088-2098]	4.81902e+06	37.97
	IDGITIQAR		1	1	1	P16546	0	986.563	493.784			0.005182	1.88	[R].IDGITIQAR.[Q]	P16546 [734-742]
	LDILDQER		1	1	1	P16546	0	1001.53	501.267			0.02074	1.84	[K].LDILDQER.[T]	P16546 [1420-1427]	621280	26.92
	LFGAAEVQR		1	1	1	P16546	0	990.537	495.772			0.0008165	2.35	[K].LFGAAEVQR.[F]	P16546 [251-259]	5.5309e+06	23.83
	LGDSHDLQR		1	1	1	P16546	0	1040.51	347.508			0.0009951	1.98	[K].LGDSHDLQR.[F]	P16546 [1335-1343]	1.64885e+06	13.12
	LGESQTLQQFSR		1	1	1	P16546	0	1393.71	697.357			2.779e-07	3.98	[K].LGESQTLQQFSR.[D]	P16546 [1547-1558]	3.37722e+06	26.17
	LKDLNSQADSLMTSSAFDTSQVK	1xOxidation [M12]	1	1	1	P16546	1	2502.2	834.739			1.35e-06	2.99	[R].LKDLNSQADSLMTSSAFDTSQVK.[E]	P16546 [1714-1736]
	LKGLALQR		1	1	1	P16546	1	898.583	449.794			0.01859	2.17	[R].LKGLALQR.[Q]	P16546 [240-247]	1.41104e+06	19.93
	LIDVNHYAK		1	1	2	P16546	0	1072.58	358.197			4.094e-05	1.88	[K].LIDVNHYAK.[E]	P16546 [638-646]	2.9264e+06	20.87
	LLEAQSHFR		1	1	2	P16546	0	1100.58	367.532			1.123e-06	2.92	[K].LLEAQSHFR.[K]	P16546 [2079-2087]	7407390	19.75
	LLEATELK		1	1	2	P16546	0	916.535	458.77			0.01072	1.84	[K].LLEATELK.[G]	P16546 [663-670]	2.20435e+06	24.3
	LIQEQHPEEELIK		1	1	2	P16546	0	1605.85	803.428			3.722e-09	4.15	[K].LIQEQHPEEELIK.[T]	P16546 [215-227]	6.35655e+06	24.59
	LIQNNHYAMEDVATR	1xOxidation [M9]	1	1	1	P16546	0	1790.85	597.62			0.008384	1.54	[K].LIQNNHYAMEDVATR.[R]	P16546 [533-547]
	LIQNNHYAMEDVATRR	1xOxidation [M9]	1	1	1	P16546	1	1946.95	649.655			0.0007587	1.76	[K].LIQNNHYAMEDVATRR.[D]	P16546 [533-548]
	LIQSHPESAEDLKEK		1	1	2	P16546	1	1723.89	431.724			1.154e-06	2.95	[R].LIQSHPESAEDLKEK.[C]	P16546 [1299-1313]	199320	17.5
	LLVSSEDYGR		1	1	1	P16546	0	1138.57	569.791			0.0002752	1.9	[K].LLVSSEDYGR.[D]	P16546 [1785-1794]	3.22383e+06	23.53
	LMVHTVATFNSIK	1xOxidation [M2]	1	1	1	P16546	0	1476.79	492.931			0.002164	1.14	[R].LMVHTVATFNSIK.[E]	P16546 [1197-1209]
	LNHQEFK		1	1	1	P16546	0	915.468	458.236			0.01481	1.71	[R].LNHQEFK.[S]	P16546 [2343-2349]	757814	10.99
	LQQSHPLSASQIQVK		1	1	1	P16546	0	1663.91	555.308			0.0004457	2.32	[R].LQQSHPLSASQIQVK.[R]	P16546 [321-335]
	LQTASDESYKDPTNIQSK		1	1	1	P16546	1	2024.98	675.663			5.408e-11	3.6	[K].LQTASDESYKDPTNIQSK.[H]	P16546 [1571-1588]	1.49038e+06	20.26
	LQVASDENYKDPTNLQGK		1	1	2	P16546	1	2020	674.003			1.267e-07	3.01	[K].LQVASDENYKDPTNLQGK.[L]	P16546 [64-81]	2.10818e+06	23.56
	LSDDNTIGQEEIQQR		1	1	1	P16546	0	1745.83	873.418			2.638e-08	4.34	[K].LSDDNTIGQEEIQQR.[L]	P16546 [1830-1844]	2.2437e+06	22.9
	LSELNQK		1	1	1	P16546	0	831.457	416.232			0.009786	1.62	[K].LSELNQK.[W]	P16546 [865-871]	371803	13.08
	LSILSEER		1	1	1	P16546	0	946.52	473.762			0.01017	2.25	[K].LSILSEER.[T]	P16546 [442-449]	4.53792e+06	25.45
	ITALDEFATK		1	1	1	P16546	0	1108.59	554.797			0.0001123	2.83	[K].ITALDEFATK.[L]	P16546 [523-532]	4.58562e+06	29.97
	MQHNLEQQIQAR	1xOxidation [M1]	1	1	2	P16546	0	1511.74	756.372			5.566e-07	2.91	[R].MQHNLEQQIQAR.[N]	P16546 [2304-2315]	1.10316e+06	18.28
	NQALNTDNYGHDLASVQALQR		1	1	1	P16546	0	2328.13	776.717			4.847e-14	4.84	[K].NQALNTDNYGHDLASVQALQR.[K]	P16546 [1253-1273]	957765	30.78
	NTTGVTEEALK		1	1	1	P16546	0	1162.6	581.8			0.0002615	2.34	[R].NTTGVTEEALK.[E]	P16546 [2316-2326]
	NTTGVTEEALKEFSMMFK	2xOxidation [M15; M16]	1	1	1	P16546	1	2094.97	698.994			0.01375	1.36	[R].NTTGVTEEALKEFSMMFK.[H]	P16546 [2316-2333]	492583	39.91
	QGFVPAAYVK		1	1	1	P16546	0	1079.59	540.297			0.0002147	2.35	[R].QGFVPAAYVK.[K]	P16546 [1013-1022]	1.40992e+06	28.86
	RLEAELAAHEPAIQGVLDTGKK		1	1	1	P16546	2	2346.28	587.326			9.989e-07	3.23	[K].RLEAELAAHEPAIQGVLDTGKK.[L]	P16546 [1808-1829]	587128	30.89
	SADESGQALLAASHYASDEVR		1	1	1	P16546	0	2177.01	726.342			4.733e-15	4.94	[K].SADESGQALLAASHYASDEVR.[E]	P16546 [419-439]	1.05782e+06	31.82
	SLQQLAEER		1	1	1	P16546	0	1073.56	537.282			0.006957	2.39	[R].SLQQLAEER.[S]	P16546 [1217-1225]	5.10708e+06	23.16
	SQLLGSAHEVQR		1	1	2	P16546	0	1324.7	442.235			1.856e-08	3.09	[R].SQLLGSAHEVQR.[F]	P16546 [1226-1237]	4573479	18.38
	SSLSSAQADFNQLAELDR		1	1	2	P16546	0	1951.94	976.474			1.375e-12	3.48	[R].SSLSSAQADFNQLAELDR.[Q]	P16546 [2138-2155]	1.73201e+06	38.12
	TATDEAYKDPSNLQGK		1	1	2	P16546	1	1737.83	869.415			1.235e-07	2.33	[K].TATDEAYKDPSNLQGK.[V]	P16546 [595-610]	9.50624e+06	18.85
	VLETAEDIQER		1	1	1	P16546	0	1302.65	651.829			5.699e-06	3.01	[K].VLETAEDIQER.[R]	P16546 [8-18]	2.71574e+06	21.77
	VLETAEDIQERR		1	1	1	P16546	1	1458.75	486.921			0.006977	1.83	[K].VLETAEDIQERR.[Q]	P16546 [8-19]
	VNEVSQFAAK		1	1	1	P16546	0	1092.57	546.787			8.96e-05	2.75	[R].VNEVSQFAAK.[L]	P16546 [205-214]	2609057	20.96
	VNSLGETAQR		1	1	1	P16546	0	1074.55	537.781			0.01033	1.38	[K].VNSLGETAQR.[L]	P16546 [1289-1298]	261694	14.28
	WTQLLANSATR		1	1	1	P16546	0	1260.67	630.834			0.0006452	2.15	[R].WTQLLANSATR.[K]	P16546 [2065-2075]	811188	27.64
	YEALKEPMVAR		1	1	2	P16546	1	1306.68	436.23			3.299e-06	3.25	[R].YEALKEPMVAR.[K]	P16546 [766-776]	1.0077e+06	22.82
	YEALKEPMVAR	1xOxidation [M8]	1	1	2	P16546	1	1322.68	441.563			0.004505	1.46	[R].YEALKEPMVAR.[K]	P16546 [766-776]	1.26678e+06	20.87
P20029	Endoplasmic reticulum chaperone BiP OS=Mus musculus OX=10090 GN=Hspa5 PE=1 SV=3	207.27	53	39	99	37	655	72.4	5.16
	Sequence	Modifications	# Protein Groups	# Proteins	# PSMs	Master Protein Accessions	# Missed Cleavages	Theo. MH+ [Da]	m/z [Da] (by Search Engine): Sequest HT			Percolator PEP (by Search Engine): Sequest HT	XCorr (by Search Engine): Sequest HT	Annotated Sequence	Positions in Master Proteins	Abundance: F5: Sample	Top Apex RT [min]
	AKFEELNMDLFR		1	1	2	P20029	1	1512.75	756.88			5.911e-06	2.76	[R].AKFEELNMDLFR.[S]	P20029 [326-337]	4.5327e+06	36.98
	AKFEELNMDLFR	1xOxidation [M8]	1	1	1	P20029	1	1528.75	764.876			3.55e-07	3.23	[R].AKFEELNMDLFR.[S]	P20029 [326-337]	3.81783e+06	32.2
	DAGTIAGLNVMR		1	1	1	P20029	0	1217.63	609.316			9.852e-05	3.03	[K].DAGTIAGLNVMR.[I]	P20029 [187-198]	6.72811e+06	32.34
	DAGTIAGLNVMR	1xOxidation [M11]	1	1	1	P20029	0	1233.63	617.318			0.001095	2.31	[K].DAGTIAGLNVMR.[I]	P20029 [187-198]	10585890	27.04
	DNHLLGTFDLTGIPPAPR		1	1	11	P20029	0	1934.01	645.342			9.349e-07	2.7	[K].DNHLLGTFDLTGIPPAPR.[G]	P20029 [476-493]	2685560	40.96
	EFFNGKEPSR		1	1	3	P20029	1	1210.59	605.795			0.01305	1.99	[K].EFFNGKEPSR.[G]	P20029 [378-387]	3.83298e+06	19.32
	ELEEIVQPIISK		1	1	2	P20029	0	1397.79	699.395			2.036e-05	3.26	[K].ELEEIVQPIISK.[L]	P20029 [623-634]	9198571	35.34
	ETAEAYLGK		1	1	1	P20029	0	981.489	491.247			0.02617	1.99	[K].ETAEAYLGK.[K]	P20029 [156-164]
	FEELNMDLFR		1	1	1	P20029	0	1313.62	657.312			0.0002337	2.14	[K].FEELNMDLFR.[S]	P20029 [328-337]	259857	40.55
	FEELNMDLFR	1xOxidation [M6]	1	1	1	P20029	0	1329.61	665.308			1.979e-05	2.36	[K].FEELNMDLFR.[S]	P20029 [328-337]	608027	34.68
	KKELEEIVQPIISK		1	1	2	P20029	2	1653.98	827.494			3.453e-11	4.24	[K].KKELEEIVQPIISK.[L]	P20029 [621-634]	7.15965e+06	29.35
	KSDIDEIVLVGGSTR		1	1	2	P20029	1	1588.85	530.287			0.0002787	2.57	[K].KSDIDEIVLVGGSTR.[I]	P20029 [354-368]	3.47902e+06	30.48
	KSQIFSTASDNQPTVTIK		1	1	1	P20029	1	1965.03	655.682			7.203e-06	3.06	[K].KSQIFSTASDNQPTVTIK.[V]	P20029 [448-465]	1098749	26.56
	KTKPYIQVDIGGGQTK		1	1	2	P20029	1	1732.96	578.323			2.224e-07	4.01	[K].KTKPYIQVDIGGGQTK.[T]	P20029 [124-139]	1.16797e+06	22.66
	IDTRNELESYAYSLK		1	1	3	P20029	1	1801.9	901.454			3.471e-08	2.25	[R].IDTRNELESYAYSLK.[N]	P20029 [560-574]	3.76277e+06	32.78
	IEWLESHQDADIEDFKAK		1	1	1	P20029	1	2174.04	725.353			0.06371	1.23	[K].IEWLESHQDADIEDFKAK.[K]	P20029 [603-620]	204592	31.89
	IINEPTAAAIAYGLDKR		1	1	3	P20029	1	1816	908.502			2.436e-10	4.55	[R].IINEPTAAAIAYGLDKR.[E]	P20029 [199-215]	19112208	33.55
	ITITNDQNR		1	1	1	P20029	0	1074.55	537.78			0.006026	2.33	[K].ITITNDQNR.[L]	P20029 [525-533]	8082079	15.78
	LTPEEIER		1	1	1	P20029	0	986.515	493.762			0.01214	2.03	[R].LTPEEIER.[M]	P20029 [534-541]	16735284	20.97
	ITPSYVAFTPEGER		1	1	3	P20029	0	1566.78	522.93			1.923e-05	3.58	[R].ITPSYVAFTPEGER.[L]	P20029 [62-75]	2.60114e+07	31.47
	LYGSGGPPPTGEEDTSEKDEL		1	1	3	P20029	1	2177.97	1089.49			7.506e-09	2.82	[K].LYGSGGPPPTGEEDTSEKDEL.[-]	P20029 [635-655]	4.05601e+06	26.3
	MKETAEAYLGK		1	1	2	P20029	1	1240.62	620.815			1.6e-05	1.99	[K].MKETAEAYLGK.[K]	P20029 [154-164]	2.21432e+06	20.09
	MKETAEAYLGK	1xOxidation [M1]	1	1	2	P20029	1	1256.62	628.812			1.969e-06	3.04	[K].MKETAEAYLGK.[K]	P20029 [154-164]	2.30207e+06	17.91
	MKETAEAYLGKK		1	1	1	P20029	2	1368.72	456.91			4.578e-09	4.23	[K].MKETAEAYLGKK.[V]	P20029 [154-165]	1.35841e+06	17.45
	MKETAEAYLGKK	1xOxidation [M1]	1	1	3	P20029	2	1384.71	462.242			4.677e-07	2.66	[K].MKETAEAYLGKK.[V]	P20029 [154-165]	2.44876e+06	15.4
	MVNDAEKFAEEDKK		1	1	2	P20029	2	1653.78	551.929			4.532e-05	2.01	[R].MVNDAEKFAEEDKK.[L]	P20029 [542-555]	1.76705e+06	18.8
	MVNDAEKFAEEDKK	1xOxidation [M1]	1	1	1	P20029	2	1669.77	557.261			0.0002337	2.55	[R].MVNDAEKFAEEDKK.[L]	P20029 [542-555]	1.06143e+06	16.68
	NELESYAYSLK		1	1	2	P20029	0	1316.64	658.822			7.892e-05	2.92	[R].NELESYAYSLK.[N]	P20029 [564-574]	8904000	30.85
	NGRVEIIANDQGNR		1	1	2	P20029	1	1555.79	778.403			0.0004301	1.42	[K].NGRVEIIANDQGNR.[I]	P20029 [48-61]	1.17122e+06	18.11
	NQLTSNPENTVFDAK		1	1	2	P20029	0	1677.81	839.406			7.2e-08	2.28	[K].NQLTSNPENTVFDAK.[R]	P20029 [83-97]	8444993	27.86
	NQLTSNPENTVFDAKR		1	1	2	P20029	1	1833.91	917.457			4.861e-09	3.39	[K].NQLTSNPENTVFDAKR.[L]	P20029 [83-98]	7.10792e+06	25.2
	NTVVPTKK		1	1	1	P20029	1	886.536	443.77			0.02811	1.88	[R].NTVVPTKK.[S]	P20029 [441-448]	2.18277e+06	9.01
	SDIDEIVLVGGSTR		1	1	3	P20029	0	1460.76	730.883			4.769e-08	3.24	[K].SDIDEIVLVGGSTR.[I]	P20029 [355-368]	5.03071e+06	34.54
	SQIFSTASDNQPTVTIK		1	1	2	P20029	0	1836.93	918.97			1.874e-10	4.29	[K].SQIFSTASDNQPTVTIK.[V]	P20029 [449-465]	1.01241e+07	29.96
	TFAPEEISAMVLTK		1	1	2	P20029	0	1536.8	768.905			4.402e-07	2.36	[K].TFAPEEISAMVLTK.[M]	P20029 [140-153]	2.07707e+06	41.36
	TFAPEEISAMVLTK	1xOxidation [M10]	1	1	4	P20029	0	1552.79	776.898			1.334e-05	2	[K].TFAPEEISAMVLTK.[M]	P20029 [140-153]	7.23097e+06	36.48
	TKPYIQVDIGGGQTK		1	1	2	P20029	0	1604.86	802.933			4.418e-08	3.07	[K].TKPYIQVDIGGGQTK.[T]	P20029 [125-139]	6.57914e+06	25.66
	TWNDPSVQQDIK		1	1	1	P20029	0	1430.69	715.847			3.4e-05	2.69	[R].TWNDPSVQQDIK.[F]	P20029 [103-114]
	VLEDSDLK		1	1	1	P20029	0	918.478	459.741			0.02778	1.64	[K].VLEDSDLK.[K]	P20029 [346-353]	6.26855e+06	18.33
	VLEDSDLKK		1	1	1	P20029	1	1046.57	523.788			0.002132	2.03	[K].VLEDSDLKK.[S]	P20029 [346-354]	2.0824e+06	14.98
	VLEDSDLKKSDIDEIVLVGGSTR		1	1	2	P20029	2	2488.31	830.11			2.173e-15	3.6	[K].VLEDSDLKKSDIDEIVLVGGSTR.[I]	P20029 [346-368]	1.00559e+06	34.36
	VMEHFIK		1	1	2	P20029	0	903.476	301.829			0.01078	2.02	[R].VMEHFIK.[L]	P20029 [263-269]	9312277	20.25
	VMEHFIK	1xOxidation [M2]	1	1	2	P20029	0	919.471	307.161			0.007662	1.87	[R].VMEHFIK.[L]	P20029 [263-269]	6539542	16.41
	VTHAVVTVPAYFNDAQR		1	1	3	P20029	0	1887.97	944.486			3.118e-08	3.48	[K].VTHAVVTVPAYFNDAQR.[Q]	P20029 [166-182]	7807377	30.77
	VYEGERPLTK		1	1	2	P20029	0	1191.64	397.883			3.771e-05	2.36	[K].VYEGERPLTK.[D]	P20029 [466-475]	17524174	15.78
	IINEPTAAAIAYGLDK		3	4	5	P20029; P63017; P16627	0	1659.9	553.969			5.058e-08	3.43	[R].IINEPTAAAIAYGLDK.[RKG]	P20029 [199-214]; P63017 [172-187]; P16627 [174-189]	16747504	36.03
	VEIIANDQGNR		4	6	1	P20029; Q61696; P63017; P16627	0	1228.63	614.818			3.359e-05	2.65	[RK].VEIIANDQGNR.[IT]	P20029 [51-61]; Q61696 [26-36]; P63017 [26-36]; P16627 [28-38]	28137458	19.44
Q8BMS1	Trifunctional enzyme subunit alpha, mitochondrial OS=Mus musculus OX=10090 GN=Hadha PE=1 SV=1	197.85	57	41	113	41	763	82.6	9.14
	Sequence	Modifications	# Protein Groups	# Proteins	# PSMs	Master Protein Accessions	# Missed Cleavages	Theo. MH+ [Da]	m/z [Da] (by Search Engine): Sequest HT			Percolator PEP (by Search Engine): Sequest HT	XCorr (by Search Engine): Sequest HT	Annotated Sequence	Positions in Master Proteins	Abundance: F5: Sample	Top Apex RT [min]
	ADMVIEAVFEDLGVK		1	1	1	Q8BMS1	0	1635.83	818.42			0.005984	0.99	[K].ADMVIEAVFEDLGVK.[H]	Q8BMS1 [441-455]	106185	51.23
	AGLEQGSDAGYLAESQK		1	1	4	Q8BMS1	0	1723.81	862.409			8.109e-10	4.2	[K].AGLEQGSDAGYLAESQK.[F]	Q8BMS1 [310-326]	4.66459e+07	24.57
	AGLEQGSDAGYLAESQKFGELALTK		1	1	1	Q8BMS1	1	2583.29	861.767			1.31e-09	3.06	[K].AGLEQGSDAGYLAESQKFGELALTK.[E]	Q8BMS1 [310-334]
	ALMGLYNGQVLCK	1xCarbamidomethyl [C12]	1	1	1	Q8BMS1	0	1466.75	733.877			3.113e-05	2.54	[K].ALMGLYNGQVLCK.[K]	Q8BMS1 [338-350]
	ALMGLYNGQVLCK	1xCarbamidomethyl [C12]; 1xOxidation [M3]	1	1	1	Q8BMS1	0	1482.74	741.876			2.585e-07	2.96	[K].ALMGLYNGQVLCK.[K]	Q8BMS1 [338-350]
	CLAPMMSEVMR	1xCarbamidomethyl [C1]	1	1	1	Q8BMS1	0	1324.59	662.797			0.007858	1.45	[R].CLAPMMSEVMR.[I]	Q8BMS1 [550-560]
	CLAPMMSEVMR	1xCarbamidomethyl [C1]; 3xOxidation [M5; M6; M10]	1	1	1	Q8BMS1	0	1372.57	686.79			0.05099	1.35	[R].CLAPMMSEVMR.[I]	Q8BMS1 [550-560]	691027	18.39
	DGPGFYTTR		1	1	2	Q8BMS1	0	1013.47	507.237			0.005057	2.12	[K].DGPGFYTTR.[C]	Q8BMS1 [541-549]	5.07511e+07	21.88
	DTTASAVAVGLR		1	1	2	Q8BMS1	0	1160.63	580.817			0.0002805	2.59	[K].DTTASAVAVGLR.[Q]	Q8BMS1 [520-531]	6.36863e+07	25.84
	DTTVTGLGR		1	1	1	Q8BMS1	0	919.484	460.244			0.03894	2	[K].DTTVTGLGR.[G]	Q8BMS1 [391-399]	30176212	18.83
	EVESVTPEHCIFASNTSALPINQIAAVSK	1xCarbamidomethyl [C10]	1	1	1	Q8BMS1	0	3112.56	1038.19			1.455e-10	3.65	[K].EVESVTPEHCIFASNTSALPINQIAAVSK.[R]	Q8BMS1 [461-489]	6107151	40.07
	FGELALTK		1	1	4	Q8BMS1	0	878.498	439.752			0.00605	2.58	[K].FGELALTK.[E]	Q8BMS1 [327-334]	85081632	27.4
	FGGGSVELLK		1	1	3	Q8BMS1	0	1006.56	503.782			0.0004769	2.71	[R].FGGGSVELLK.[Q]	Q8BMS1 [611-620]	8.08363e+07	28.92
	FVDLYGAQK		1	1	2	Q8BMS1	0	1040.54	520.774			0.0004689	2.54	[R].FVDLYGAQK.[V]	Q8BMS1 [720-728]	71385096	26.09
	GFYIYQEGSK		1	1	1	Q8BMS1	0	1191.57	596.287			0.0004219	1.82	[K].GFYIYQEGSK.[N]	Q8BMS1 [635-644]	52566316	27.19
	GLYPAPLK		1	1	2	Q8BMS1	0	858.508	429.757			0.03662	1.71	[K].GLYPAPLK.[I]	Q8BMS1 [296-303]	45843540	26.21
	KALTSFER		1	1	1	Q8BMS1	1	951.526	476.265			0.03023	2.08	[K].KALTSFER.[D]	Q8BMS1 [415-422]	4.47218e+06	17.18
	KLDALTTGFGFPVGAATLADEVGVDVAQHVAEDLGK		1	1	3	Q8BMS1	1	3611.86	1204.62			9.471e-07	2.54	[K].KLDALTTGFGFPVGAATLADEVGVDVAQHVAEDLGK.[A]	Q8BMS1 [570-605]	1.22988e+06	52.67
	KMGLVDQLVEPLGPGIK		1	1	2	Q8BMS1	1	1794.02	897.513			2.2e-06	1.81	[K].KMGLVDQLVEPLGPGIK.[S]	Q8BMS1 [214-230]	1.15597e+06	38.53
	KMGLVDQLVEPLGPGIK	1xOxidation [M2]	1	1	2	Q8BMS1	1	1810.01	905.512			8.627e-08	2.23	[K].KMGLVDQLVEPLGPGIK.[S]	Q8BMS1 [214-230]	5.6479e+06	35.77
	KTVLGVPEVLLGILPGAGGTQR		1	1	1	Q8BMS1	1	2175.29	725.766			0.06729	1.51	[R].KTVLGVPEVLLGILPGAGGTQR.[L]	Q8BMS1 [166-187]	1.9199e+06	47.66
	KYESAYGTQFTPCQLLLDHANNSSK	1xCarbamidomethyl [C13]	1	1	4	Q8BMS1	1	2872.36	718.843			2.913e-11	3.62	[R].KYESAYGTQFTPCQLLLDHANNSSK.[K]	Q8BMS1 [735-759]	4591957	34.08
	KYESAYGTQFTPCQLLLDHANNSSKK	1xCarbamidomethyl [C13]	1	1	2	Q8BMS1	2	3000.45	750.865			5.978e-09	3.09	[R].KYESAYGTQFTPCQLLLDHANNSSKK.[F]	Q8BMS1 [735-760]	743154	31.85
	ILQEGVDPK		1	1	2	Q8BMS1	0	998.552	499.778			0.00502	2.16	[R].ILQEGVDPK.[K]	Q8BMS1 [561-569]	73373576	18.67
	ILQEGVDPKK		1	1	1	Q8BMS1	1	1126.65	376.22			0.01752	1.14	[R].ILQEGVDPKK.[L]	Q8BMS1 [561-570]	275469	15.8
	INSPNSK		1	1	1	Q8BMS1	0	759.4	380.203			0.01793	1.29	[R].INSPNSK.[V]	Q8BMS1 [54-60]	675311	5.76
	LPAKPEVSSDEDVQYR		1	1	3	Q8BMS1	0	1832.9	916.952			2.34e-13	3.48	[R].LPAKPEVSSDEDVQYR.[V]	Q8BMS1 [661-676]	72722004	22.32
	ISQEGQR		1	1	1	Q8BMS1	0	817.416	409.209			0.05979	1.17	[R].ISQEGQR.[M]	Q8BMS1 [119-125]	1.09895e+06	5.29
	LTTYAMTVPFVR		1	1	3	Q8BMS1	0	1398.74	699.876			0.0002883	2.74	[K].LTTYAMTVPFVR.[Q]	Q8BMS1 [268-279]	1.7451e+07	38.5
	LTTYAMTVPFVR	1xOxidation [M6]	1	1	3	Q8BMS1	0	1414.74	707.874			4.806e-05	2.56	[K].LTTYAMTVPFVR.[Q]	Q8BMS1 [268-279]	46398410	33.21
	MFEKLEK	1xOxidation [M1]	1	1	2	Q8BMS1	1	940.481	470.742			0.03395	1.68	[R].MFEKLEK.[S]	Q8BMS1 [126-132]	3275575	14.66
	MGLVDQLVEPLGPGIK		1	1	3	Q8BMS1	0	1665.92	833.466			4.646e-06	2.1	[K].MGLVDQLVEPLGPGIK.[S]	Q8BMS1 [215-230]	1.99279e+06	42.9
	MGLVDQLVEPLGPGIK	1xOxidation [M1]	1	1	3	Q8BMS1	0	1681.92	841.461			7.656e-08	3.2	[K].MGLVDQLVEPLGPGIK.[S]	Q8BMS1 [215-230]	12466656	40.42
	MQLLEIITTDK		1	1	1	Q8BMS1	0	1304.71	652.861			1.989e-05	1.97	[K].MQLLEIITTDK.[T]	Q8BMS1 [506-516]	4329040	40.23
	MQLLEIITTDK	1xOxidation [M1]	1	1	2	Q8BMS1	0	1320.71	660.857			4.893e-06	3.47	[K].MQLLEIITTDK.[T]	Q8BMS1 [506-516]	15137955	35.2
	MQLLEIITTDKTSK		1	1	3	Q8BMS1	1	1620.89	810.951			1.283e-06	3.48	[K].MQLLEIITTDKTSK.[D]	Q8BMS1 [506-519]	1.60587e+06	35.79
	MQLLEIITTDKTSK	1xOxidation [M1]	1	1	2	Q8BMS1	1	1636.88	818.948			8.691e-08	3.65	[K].MQLLEIITTDKTSK.[D]	Q8BMS1 [506-519]	3.67824e+06	31.07
	MVGVPAAFDMMLTGR		1	1	1	Q8BMS1	0	1595.77	798.389			0.04043	1.31	[K].MVGVPAAFDMMLTGR.[N]	Q8BMS1 [191-205]	318144	46.56
	MVGVPAAFDMMLTGR	1xOxidation [M]	1	1	5	Q8BMS1	0	1611.77	806.388			5.902e-07	3	[K].MVGVPAAFDMMLTGR.[N]	Q8BMS1 [191-205]	2.00457e+06	43.93
	MVGVPAAFDMMLTGR	2xOxidation [M10; M]	1	1	5	Q8BMS1	0	1627.76	814.386			4.642e-06	2.06	[K].MVGVPAAFDMMLTGR.[N]	Q8BMS1 [191-205]	6.46072e+06	40.89
	MVGVPAAFDMMLTGR	3xOxidation [M1; M10; M11]	1	1	2	Q8BMS1	0	1643.76	822.384			1.647e-06	1.89	[K].MVGVPAAFDMMLTGR.[N]	Q8BMS1 [191-205]	1.02332e+07	33.58
	NVQQLAILGAGLMGAGIAQVSVDK		1	1	1	Q8BMS1	0	2353.29	785.101			2.91e-11	4.04	[K].NVQQLAILGAGLMGAGIAQVSVDK.[G]	Q8BMS1 [360-383]	986198	50.89
	NVQQLAILGAGLMGAGIAQVSVDK	1xOxidation [M13]	1	1	1	Q8BMS1	0	2369.29	790.435			4.323e-06	2.1	[K].NVQQLAILGAGLMGAGIAQVSVDK.[G]	Q8BMS1 [360-383]	503775	44.09
	SLNSEMDNILANLR		1	1	1	Q8BMS1	0	1589.8	795.401			1.275e-08	3.65	[K].SLNSEMDNILANLR.[L]	Q8BMS1 [647-660]	1.62856e+06	44.38
	SLNSEMDNILANLR	1xOxidation [M6]	1	1	6	Q8BMS1	0	1605.79	803.396			7.889e-08	2.38	[K].SLNSEMDNILANLR.[L]	Q8BMS1 [647-660]	1.14554e+07	35.34
	TIEYLEEVAVNFAK		1	1	3	Q8BMS1	0	1625.84	813.427			5.885e-07	2.57	[R].TIEYLEEVAVNFAK.[G]	Q8BMS1 [236-249]	2.20395e+06	45.13
	TLLKDTTVTGLGR		1	1	2	Q8BMS1	1	1374.8	687.901			1.289e-06	2.48	[K].TLLKDTTVTGLGR.[G]	Q8BMS1 [387-399]	32026858	26.29
	TSKDTTASAVAVGLR		1	1	2	Q8BMS1	1	1476.8	738.904			5.34e-10	3.73	[K].TSKDTTASAVAVGLR.[Q]	Q8BMS1 [517-531]	3.28925e+06	21.6
	TVLGVPEVLLGILPGAGGTQR		1	1	2	Q8BMS1	0	2047.19	1024.1			6.467e-09	3.26	[K].TVLGVPEVLLGILPGAGGTQR.[L]	Q8BMS1 [167-187]	4.61408e+06	51.5
	VIGMHYFSPVDK		1	1	2	Q8BMS1	0	1392.7	696.852			1.242e-08	3.69	[K].VIGMHYFSPVDK.[M]	Q8BMS1 [494-505]	27468988	29.38
	VIGMHYFSPVDK	1xOxidation [M4]	1	1	4	Q8BMS1	0	1408.69	704.852			4.902e-08	3.45	[K].VIGMHYFSPVDK.[M]	Q8BMS1 [494-505]	3.90173e+07	24.91
	VIGMHYFSPVDKMQLLEIITTDK	2xOxidation [M4; M13]	1	1	1	Q8BMS1	1	2710.38	678.352			1.357e-05	1.83	[K].VIGMHYFSPVDKMQLLEIITTDK.[T]	Q8BMS1 [494-516]	418599	40.18
	VLKEVESVTPEHCIFASNTSALPINQIAAVSK	1xCarbamidomethyl [C13]	1	1	1	Q8BMS1	1	3452.81	863.956			8.48e-09	3.43	[K].VLKEVESVTPEHCIFASNTSALPINQIAAVSK.[R]	Q8BMS1 [458-489]
	VNTLNK		1	1	1	Q8BMS1	0	688.399	344.702			0.08776	1.07	[K].VNTLNK.[E]	Q8BMS1 [61-66]	1.80227e+06	7.34
Q68FD5	Clathrin heavy chain 1 OS=Mus musculus OX=10090 GN=Cltc PE=1 SV=3	192.57	32	50	85	50	1675	191.4	5.69
	Sequence	Modifications	# Protein Groups	# Proteins	# PSMs	Master Protein Accessions	# Missed Cleavages	Theo. MH+ [Da]	m/z [Da] (by Search Engine): Sequest HT			Percolator PEP (by Search Engine): Sequest HT	XCorr (by Search Engine): Sequest HT	Annotated Sequence	Positions in Master Proteins	Abundance: F5: Sample	Top Apex RT [min]
	AFMTADLPNELIELLEK		1	1	1	Q68FD5	0	1947.01	974.011			0.003641	0.98	[K].AFMTADLPNELIELLEK.[I]	Q68FD5 [994-1010]	142483	52.59
	AHMGMFTELAILYSK	2xOxidation [M3; M5]	1	1	1	Q68FD5	0	1743.84	581.951			1.129e-05	2.27	[R].AHMGMFTELAILYSK.[F]	Q68FD5 [1312-1326]	891373	35.3
	ALEHFTDLYDIKR		1	1	3	Q68FD5	1	1620.84	540.95			2.154e-11	4.42	[R].ALEHFTDLYDIKR.[A]	Q68FD5 [626-638]	1.13597e+07	30.11
	AVNYFSK		1	1	1	Q68FD5	0	828.425	414.715			0.04305	1.93	[R].AVNYFSK.[V]	Q68FD5 [1435-1441]	4.89952e+06	20.01
	AYEFAER		1	1	1	Q68FD5	0	885.41	443.208			0.03856	1.79	[R].AYEFAER.[C]	Q68FD5 [1095-1101]	4.77663e+06	19.89
	DAMQYASESK		1	1	1	Q68FD5	0	1129.48	565.245			0.001262	2.17	[K].DAMQYASESK.[D]	Q68FD5 [1536-1545]	573157	17.53
	DAMQYASESK	1xOxidation [M3]	1	1	1	Q68FD5	0	1145.48	573.242			0.001727	1.48	[K].DAMQYASESK.[D]	Q68FD5 [1536-1545]	604284	12.26
	DPHLACVAYER	1xCarbamidomethyl [C6]	1	1	1	Q68FD5	0	1330.62	444.211			0.0512	1.63	[R].DPHLACVAYER.[G]	Q68FD5 [913-923]	647758	22.68
	EAIDSYIK		1	1	1	Q68FD5	0	938.483	469.743			0.02639	2.44	[K].EAIDSYIK.[A]	Q68FD5 [1123-1130]	6.7533e+06	24.48
	EGQFKDIITK		1	1	2	Q68FD5	1	1178.64	393.551			0.01581	1.78	[K].EGQFKDIITK.[V]	Q68FD5 [1388-1397]
	ESNCYDPER	1xCarbamidomethyl [C4]	1	1	1	Q68FD5	0	1169.45	585.229			0.05146	0.96	[R].ESNCYDPER.[V]	Q68FD5 [750-758]	262046	14.17
	FLRENPYYDSR		1	1	1	Q68FD5	1	1459.7	487.237			0.02093	2.04	[R].FLRENPYYDSR.[V]	Q68FD5 [893-903]	460308	22.4
	FNALFAQGNYSEAAK		1	1	1	Q68FD5	0	1630.79	815.901			4.243e-07	2.21	[K].FNALFAQGNYSEAAK.[V]	Q68FD5 [368-382]
	GQFSTDELVAEVEKR		1	1	1	Q68FD5	1	1707.85	569.955			3.016e-10	4.08	[R].GQFSTDELVAEVEKR.[N]	Q68FD5 [838-852]	4.28438e+06	33.84
	HELIEFR		1	1	1	Q68FD5	0	943.5	472.253			0.01063	2.47	[K].HELIEFR.[R]	Q68FD5 [1502-1508]	3.54132e+06	24.8
	HELIEFRR		1	1	1	Q68FD5	1	1099.6	367.205			0.001349	2.33	[K].HELIEFRR.[I]	Q68FD5 [1502-1509]	2.03496e+06	21.22
	HNIMDFAMPYFIQVMK	3xOxidation [M4; M8; M15]	1	1	1	Q68FD5	0	2032.93	678.315			0.0003354	1.71	[R].HNIMDFAMPYFIQVMK.[E]	Q68FD5 [1589-1604]
	KFNALFAQGNYSEAAK		1	1	2	Q68FD5	1	1758.88	879.943			9.259e-16	5.17	[R].KFNALFAQGNYSEAAK.[V]	Q68FD5 [367-382]	7712007	28.21
	KVSQPIEGHAASFAQFK		1	1	2	Q68FD5	1	1844.97	615.659			4.711e-14	4.82	[R].KVSQPIEGHAASFAQFK.[M]	Q68FD5 [189-205]	4993381	24.92
	IAAYLFK		1	1	1	Q68FD5	0	825.487	413.247			0.02288	2.26	[R].IAAYLFK.[G]	Q68FD5 [1510-1516]	9904551	29.51
	LAELEEFINGPNNAHIQQVGDR		1	1	2	Q68FD5	0	2464.22	822.079			8.182e-15	6.05	[R].LAELEEFINGPNNAHIQQVGDR.[C]	Q68FD5 [1183-1204]	1.97176e+06	35.97
	LASTLVHLGEYQAAVDGAR		1	1	2	Q68FD5	0	1971.03	986.017			8.422e-14	3.75	[R].LASTLVHLGEYQAAVDGAR.[K]	Q68FD5 [1227-1245]	7.23885e+06	33
	LEKHELIEFR		1	1	2	Q68FD5	1	1313.72	438.577			2.245e-06	3.56	[R].LEKHELIEFR.[R]	Q68FD5 [1499-1508]	4.01079e+06	23.75
	LEKHELIEFRR		1	1	1	Q68FD5	2	1469.82	368.211			0.0003693	2.6	[R].LEKHELIEFRR.[I]	Q68FD5 [1499-1509]	1.68705e+06	21.04
	IHEGCEEPATHNALAK	1xCarbamidomethyl [C5]	1	1	1	Q68FD5	0	1776.83	444.963			0.0007649	1.1	[R].IHEGCEEPATHNALAK.[I]	Q68FD5 [866-881]
	LHIIEVGTPPTGNQPFPK		1	1	3	Q68FD5	0	1945.05	973.028			6.144e-09	2.86	[K].LHIIEVGTPPTGNQPFPK.[K]	Q68FD5 [228-245]	8.02323e+06	33.04
	LLYNNVSNFGR		1	1	1	Q68FD5	0	1296.67	648.84			1.424e-05	2.73	[K].LLYNNVSNFGR.[L]	Q68FD5 [1216-1226]	8986685	29.66
	ISGETIFVTAPHEATAGIIGVNR		1	1	1	Q68FD5	0	2353.25	785.087			5.468e-14	4.56	[R].ISGETIFVTAPHEATAGIIGVNR.[K]	Q68FD5 [298-320]	4505217	37.38
	ISGETIFVTAPHEATAGIIGVNRK		1	1	2	Q68FD5	1	2481.35	621.091			1.542e-06	2.7	[R].ISGETIFVTAPHEATAGIIGVNRK.[G]	Q68FD5 [298-321]	1.40517e+06	34.54
	IVLDNSVFSEHR		1	1	1	Q68FD5	0	1415.73	472.581			0.0002575	2.49	[K].IVLDNSVFSEHR.[N]	Q68FD5 [1011-1022]	3.2479e+06	28.97
	IYIDSNNNPER		1	1	1	Q68FD5	0	1334.63	667.819			7.756e-05	2.32	[K].IYIDSNNNPER.[F]	Q68FD5 [882-892]	8.38288e+06	19.84
	MAQILPIR	1xMet-loss+Acetyl [N-Term]	1	1	2	Q68FD5	0	852.53	426.768			0.01349	2	[-].MAQILPIR.[F]	Q68FD5 [1-8]	3334821	37.34
	NNLAGAEELFAR		1	1	1	Q68FD5	0	1304.66	652.832			9.955e-06	3.07	[R].NNLAGAEELFAR.[K]	Q68FD5 [355-366]	12623680	33.13
	NNRPSEGPLQTR		1	1	2	Q68FD5	0	1368.7	456.903			1.403e-07	3.76	[K].NNRPSEGPLQTR.[L]	Q68FD5 [572-583]	2.36337e+06	14.66
	QLPLVKPYLR		1	1	2	Q68FD5	0	1226.76	409.591			1.632e-06	2.3	[K].QLPLVKPYLR.[S]	Q68FD5 [1444-1453]	4.72623e+06	29.9
	RDPHLACVAYER	1xCarbamidomethyl [C7]	1	1	1	Q68FD5	1	1486.72	496.244			6.966e-05	1.98	[K].RDPHLACVAYER.[G]	Q68FD5 [912-923]	1.27385e+06	19.11
	RPISADSAIMNPASK		1	1	1	Q68FD5	0	1557.81	779.405			2.523e-07	2.76	[R].RPISADSAIMNPASK.[V]	Q68FD5 [64-78]	2.00189e+06	22.61
	RPISADSAIMNPASK	1xOxidation [M10]	1	1	2	Q68FD5	0	1573.8	525.27			1.545e-06	4.95	[R].RPISADSAIMNPASK.[V]	Q68FD5 [64-78]	4.83621e+06	19.73
	SVNESLNNLFITEEDYQALR		1	1	2	Q68FD5	0	2355.15	1178.07			3.562e-08	3.49	[K].SVNESLNNLFITEEDYQALR.[T]	Q68FD5 [1462-1481]	1.5753e+06	42.43
	TGQIKEVER		1	1	2	Q68FD5	1	1059.58	353.865			0.03962	0.66	[K].TGQIKEVER.[I]	Q68FD5 [738-746]
	TLQIFNIEMK		1	1	1	Q68FD5	0	1236.67	618.837			0.0003212	2.21	[K].TLQIFNIEMK.[S]	Q68FD5 [87-96]	1.53054e+06	39.67
	TLQIFNIEMK	1xOxidation [M9]	1	1	3	Q68FD5	0	1252.66	626.832			0.0008259	2.24	[K].TLQIFNIEMK.[S]	Q68FD5 [87-96]	4305503	35.25
	TSIDAYDNFDNISLAQR		1	1	1	Q68FD5	0	1942.91	648.308			6.545e-05	2.05	[R].TSIDAYDNFDNISLAQR.[L]	Q68FD5 [1482-1498]	800616	36.12
	VANVELYYK		1	1	1	Q68FD5	0	1098.58	549.793			0.001228	2.65	[K].VANVELYYK.[A]	Q68FD5 [1398-1406]	4654697	26.31
	VDKLDASESLR		1	1	3	Q68FD5	1	1232.65	616.829			2.205e-06	2.23	[K].VDKLDASESLR.[K]	Q68FD5 [1610-1620]	2.06234e+06	19.19
	VGEQAQVVIIDMNDPSNPIR		1	1	2	Q68FD5	0	2195.11	1098.06			0.0008882	1.92	[K].VGEQAQVVIIDMNDPSNPIR.[R]	Q68FD5 [44-63]	239063	38.11
	VGEQAQVVIIDMNDPSNPIR	1xOxidation [M12]	1	1	2	Q68FD5	0	2211.11	737.708			6.985e-07	3.18	[K].VGEQAQVVIIDMNDPSNPIR.[R]	Q68FD5 [44-63]	867601	32.89
	VKQLPLVKPYLR		1	1	2	Q68FD5	1	1453.93	364.236			2.183e-06	2.02	[K].VKQLPLVKPYLR.[S]	Q68FD5 [1442-1453]	2.40825e+06	27.25
	VMEYINR		1	1	1	Q68FD5	0	924.461	462.733			0.05448	1.61	[R].VMEYINR.[L]	Q68FD5 [1040-1046]	2.51926e+06	20.75
	VMEYINR	1xOxidation [M2]	1	1	2	Q68FD5	0	940.456	470.73			0.03569	1.72	[R].VMEYINR.[L]	Q68FD5 [1040-1046]	1.95703e+06	16.61
	VSQPIEGHAASFAQFK		1	1	2	Q68FD5	0	1716.87	858.94			1.181e-08	3.04	[K].VSQPIEGHAASFAQFK.[M]	Q68FD5 [190-205]	6.8868e+06	27.51
	VVGAMQLYSVDR		1	1	2	Q68FD5	0	1337.69	669.344			5.084e-07	3.44	[R].VVGAMQLYSVDR.[K]	Q68FD5 [177-188]	4.47725e+06	30.43
	VVGAMQLYSVDRK		1	1	3	Q68FD5	1	1465.78	733.39			9.5e-07	2.9	[R].VVGAMQLYSVDRK.[V]	Q68FD5 [177-189]	2.90558e+06	26.61
	VVGAMQLYSVDRK	1xOxidation [M5]	1	1	1	Q68FD5	1	1481.78	741.393			2.634e-06	2.11	[R].VVGAMQLYSVDRK.[V]	Q68FD5 [177-189]
	WLLLTGISAQQNR		1	1	1	Q68FD5	0	1499.83	750.419			4.61e-05	2.29	[K].WLLLTGISAQQNR.[V]	Q68FD5 [164-176]	694199	39.78
	YIEIYVQK		1	1	1	Q68FD5	0	1055.58	528.29			0.007371	1.56	[K].YIEIYVQK.[V]	Q68FD5 [799-806]	1.93581e+06	27.49
Q8R0W0	Epiplakin OS=Mus musculus OX=10090 GN=Eppk1 PE=1 SV=2	183.95	51	76	102	73	6548	724.2	6.07
	Sequence	Modifications	# Protein Groups	# Proteins	# PSMs	Master Protein Accessions	# Missed Cleavages	Theo. MH+ [Da]	m/z [Da] (by Search Engine): Sequest HT			Percolator PEP (by Search Engine): Sequest HT	XCorr (by Search Engine): Sequest HT	Annotated Sequence	Positions in Master Proteins	Abundance: F5: Sample	Top Apex RT [min]
	AEIINQDLFEQLER		1	1	2	Q8R0W0	0	1717.88	859.442			3.974e-06	2.36	[K].AEIINQDLFEQLER.[G]	Q8R0W0 [583-596]	467046	40.96
	AGLVGMEQSEHLR		1	1	1	Q8R0W0	0	1426.71	476.241			1.018e-06	2.32	[K].AGLVGMEQSEHLR.[Q]	Q8R0W0 [1314-1326]	365888	23.98
	AGLVGMEQSEHLR	1xOxidation [M6]	1	1	1	Q8R0W0	0	1442.71	481.573			7.537e-06	2.72	[K].AGLVGMEQSEHLR.[Q]	Q8R0W0 [1314-1326]	758847	19.47
	AGVIGPDVYAK		1	1	1	Q8R0W0	0	1089.59	545.302			0.001227	2.46	[R].AGVIGPDVYAK.[L]	Q8R0W0 [678-688]	2106873	25.3
	ALEAEQVEVTVGR		1	1	1	Q8R0W0	0	1400.74	700.871			6.393e-08	3.3	[R].ALEAEQVEVTVGR.[Y]	Q8R0W0 [2110-2122]
	ATTMQVHR		1	1	1	Q8R0W0	0	943.478	472.242			0.002897	1.79	[R].ATTMQVHR.[G]	Q8R0W0 [2629-2636]; [3144-3151]; [3659-3666]; [4174-4181]; [4689-4696]; [5204-5211]; [5719-5726]; [6234-6241]	676518	10.64
	AVTGYPDPYGGEK		1	1	1	Q8R0W0	0	1353.63	677.317			2.313e-05	2.22	[R].AVTGYPDPYGGEK.[L]	Q8R0W0 [125-137]	665132	23.44
	AVTGYTDPYTGDQISLFQAMQR	1xOxidation [M20]	1	1	2	Q8R0W0	0	2478.16	1239.59			5.947e-11	3.59	[R].AVTGYTDPYTGDQISLFQAMQR.[D]	Q8R0W0 [2314-2335]; [2829-2850]; [3344-3365]; [3859-3880]; [4374-4395]; [4889-4910]; [5404-5425]; [5919-5940]; [6434-6455]	2.86556e+06	37.55
	DASLKQQDTGAR		1	1	1	Q8R0W0	1	1289.64	430.553			0.001963	0.79	[R].DASLKQQDTGAR.[G]	Q8R0W0 [2590-2601]; [3105-3116]; [3620-3631]; [4135-4146]; [4650-4661]; [5165-5176]; [5680-5691]; [6195-6206]	325455	10.63
	DIEYVDEATKR		1	1	2	Q8R0W0	1	1338.65	669.829			0.0001183	2.78	[K].DIEYVDEATKR.[A]	Q8R0W0 [2099-2109]
	DLIVRDHGIR		1	1	1	Q8R0W0	1	1193.67	398.563			0.001795	1.8	[R].DLIVRDHGIR.[L]	Q8R0W0 [717-726]; [1678-1687]; [2336-2345]; [2851-2860]; [3366-3375]; [3881-3890]; [4396-4405]; [4911-4920]; [5426-5435]; [5941-5950]	717622	20.42
	DLQEGMLVVSDVGTRPEVR		1	1	1	Q8R0W0	0	2100.08	700.694			0.005631	1.38	[R].DLQEGMLVVSDVGTRPEVR.[R]	Q8R0W0 [267-285]
	DPETGFYMLQLAGK		1	1	1	Q8R0W0	0	1569.76	785.383			2.629e-10	4.48	[R].DPETGFYMLQLAGK.[G]	Q8R0W0 [2415-2428]; [2930-2943]; [3445-3458]; [3960-3973]; [4475-4488]; [4990-5003]; [5505-5518]; [6020-6033]	1.53859e+06	41.46
	DPETGFYMLQLAGK	1xOxidation [M8]	1	1	2	Q8R0W0	0	1585.76	793.383			1.774e-08	3.64	[R].DPETGFYMLQLAGK.[G]	Q8R0W0 [2415-2428]; [2930-2943]; [3445-3458]; [3960-3973]; [4475-4488]; [4990-5003]; [5505-5518]; [6020-6033]
	DTVTPGELLK		1	1	1	Q8R0W0	0	1072.59	536.798			0.011	1.71	[R].DTVTPGELLK.[A]	Q8R0W0 [573-582]	712278	29.54
	EDPQGALGK		1	1	1	Q8R0W0	0	914.458	457.731			0.02722	1.94	[R].EDPQGALGK.[A]	Q8R0W0 [6116-6124]	3.64819e+06	14.76
	ELLAQFSSGSLTLPMLK	1xOxidation [M15]	1	1	1	Q8R0W0	0	1850.99	926.006			0.0002469	1.48	[K].ELLAQFSSGSLTLPMLK.[R]	Q8R0W0 [2552-2568]; [3067-3083]; [3582-3598]; [4097-4113]; [4612-4628]; [5127-5143]; [5642-5658]; [6157-6173]	467728	44.14
	FRLPLEAALR		1	1	1	Q8R0W0	1	1185.71	395.908			0.003585	2.09	[R].FRLPLEAALR.[F]	Q8R0W0 [418-427]	346607	35.6
	FVDPNTQEK		1	1	1	Q8R0W0	0	1077.52	539.263			0.002257	1.58	[R].FVDPNTQEK.[V]	Q8R0W0 [2062-2070]	878438	15.91
	GDPQGALGK		1	1	2	Q8R0W0	0	842.437	421.721			0.006277	1.06	[R].GDPQGALGK.[A]	Q8R0W0 [2511-2519]	1.12345e+06	12.75
	GFFDPNTHENLTYLQLLR		1	1	2	Q8R0W0	0	2178.1	726.704			1.144e-06	3.01	[K].GFFDPNTHENLTYLQLLR.[R]	Q8R0W0 [2393-2410]; [2908-2925]; [3423-3440]; [3938-3955]; [4453-4470]; [4968-4985]; [5483-5500]; [5998-6015]	1.28796e+06	43.68
	GHEVPVWDILTSNYVSR		1	1	1	Q8R0W0	0	1971.99	658			0.007741	1.62	[R].GHEVPVWDILTSNYVSR.[D]	Q8R0W0 [2531-2547]
	GHVVPVWDILTSNYVSR		1	1	1	Q8R0W0	0	1942.02	648.01			4.974e-05	2.21	[R].GHVVPVWDILTSNYVSR.[D]	Q8R0W0 [6136-6152]
	GIALQLLEAQAATR		1	1	2	Q8R0W0	0	1454.83	727.92			7.717e-07	3.05	[K].GIALQLLEAQAATR.[T]	Q8R0W0 [320-333]	1.10425e+06	38.26
	GQTSAQDVGSLDSVQR		1	1	1	Q8R0W0	0	1647.79	824.398			8.29e-08	3.04	[R].GQTSAQDVGSLDSVQR.[Y]	Q8R0W0 [597-612]	794324	22.27
	GSGTSPDEGDAQDSSESAR		1	1	1	Q8R0W0	0	1852.74	926.876			2.154e-08	3.12	[R].GSGTSPDEGDAQDSSESAR.[Q]	Q8R0W0 [2602-2620]; [3117-3135]; [3632-3650]; [4147-4165]; [4662-4680]; [5177-5195]; [5692-5710]; [6207-6225]	1.8908e+06	12.64
	GSGTVGGVLLKPSNQR		1	1	2	Q8R0W0	0	1569.87	523.96			3.927e-05	2.32	[R].GSGTVGGVLLKPSNQR.[I]	Q8R0W0 [936-951]	857279	22.43
	GSSVHHLSEELRR		1	1	1	Q8R0W0	1	1506.78	377.449			6.662e-06	3.18	[K].GSSVHHLSEELRR.[A]	Q8R0W0 [2429-2441]; [2944-2956]; [3459-3471]; [3974-3986]; [4489-4501]; [5004-5016]; [5519-5531]; [6034-6046]	4577553	16.18
	GVLRPGTALVLLEAQAATGFIIDPVNNR		1	1	1	Q8R0W0	0	2905.63	727.159			0.05403	0.81	[K].GVLRPGTALVLLEAQAATGFIIDPVNNR.[R]	Q8R0W0 [2260-2287]; [2775-2802]; [3290-3317]; [3805-3832]; [4320-4347]; [4835-4862]; [5350-5377]; [5865-5892]; [6380-6407]
	GYFDEDMNSILADPGDDTK	1xOxidation [M7]	1	1	2	Q8R0W0	0	2118.88	1059.94			2.019e-08	2.47	[R].GYFDEDMNSILADPGDDTK.[G]	Q8R0W0 [2374-2392]; [2889-2907]; [3404-3422]; [3919-3937]; [4434-4452]; [4949-4967]; [5464-5482]; [5979-5997]	1.06499e+06	33.65
	GYFNEEMNR		1	1	1	Q8R0W0	0	1159.48	580.244			0.05086	1.11	[R].GYFNEEMNR.[I]	Q8R0W0 [1716-1724]
	GYFNEEMNR	1xOxidation [M7]	1	1	1	Q8R0W0	0	1175.48	588.242			0.003027	1.56	[R].GYFNEEMNR.[I]	Q8R0W0 [1716-1724]	507123	19.32
	HQEGALSVEELAAELK		1	1	1	Q8R0W0	0	1723.89	575.299			0.0004009	1.96	[R].HQEGALSVEELAAELK.[N]	Q8R0W0 [539-554]	359574	37.4
	KGETYTYIDEATR		1	1	1	Q8R0W0	1	1546.74	773.871			0.0004539	1.26	[K].KGETYTYIDEATR.[Q]	Q8R0W0 [1770-1782]
	KGLVPVEQATR		1	1	1	Q8R0W0	1	1197.69	399.903			0.0641	1.23	[K].KGLVPVEQATR.[L]	Q8R0W0 [1036-1046]
	KITLEQVTQLLEK		1	1	1	Q8R0W0	1	1542.91	514.974			0.08029	0.96	[R].KITLEQVTQLLEK.[E]	Q8R0W0 [866-878]	168620	39.35
	KLTVEQAFQAGMFGK	1xOxidation [M12]	1	1	1	Q8R0W0	1	1670.86	557.624			0.06474	1.36	[R].KLTVEQAFQAGMFGK.[E]	Q8R0W0 [1630-1644]
	LGLLDEQTSR		1	1	1	Q8R0W0	0	1131.6	566.304			0.0004833	2.4	[K].LGLLDEQTSR.[V]	Q8R0W0 [1390-1399]	2.08004e+06	26.34
	LLEAQIATGGVIDPVHSHR		1	1	2	Q8R0W0	0	2013.09	504.026			2.073e-07	4.63	[R].LLEAQIATGGVIDPVHSHR.[V]	Q8R0W0 [727-745]; [2346-2364]; [2861-2879]; [3376-3394]; [3891-3909]; [4406-4424]; [4921-4939]; [5436-5454]; [5951-5969]; [6466-6484]	4721048	30.59
	LPLEAALR		1	1	1	Q8R0W0	0	882.541	441.772			0.01212	1.69	[R].LPLEAALR.[F]	Q8R0W0 [420-427]	711320	29.23
	LSLFQAIK		1	1	1	Q8R0W0	0	919.561	460.283			0.009212	1.59	[K].LSLFQAIK.[K]	Q8R0W0 [138-145]	697326	35.52
	LSLFQAIKK		1	1	2	Q8R0W0	1	1047.66	349.89			0.007423	1.4	[K].LSLFQAIKK.[E]	Q8R0W0 [138-146]	606840	30.04
	ISLYQAMK	1xOxidation [M7]	1	1	1	Q8R0W0	0	969.507	485.256			0.003081	1.83	[R].ISLYQAMK.[Q]	Q8R0W0 [952-959]	833918	21.7
	LSVEEAVAAGVVGGEIQEK		1	1	2	Q8R0W0	0	1884.99	943			1.261e-08	3.44	[R].LSVEEAVAAGVVGGEIQEK.[L]	Q8R0W0 [2289-2307]; [2804-2822]; [3319-3337]; [3834-3852]; [4349-4367]; [4864-4882]; [5379-5397]; [5894-5912]; [6409-6427]	1.90694e+06	38.23
	LSVEGAVK		1	1	1	Q8R0W0	0	802.467	401.737			0.007901	2.09	[R].LSVEGAVK.[A]	Q8R0W0 [1306-1313]	1.12002e+06	19.41
	ISVPQLQNTVR		1	1	1	Q8R0W0	0	1254.72	627.864			0.01092	1.4	[K].ISVPQLQNTVR.[S]	Q8R0W0 [1178-1188]	975478	29.76
	ITLEQVTQLLEK		1	1	1	Q8R0W0	0	1414.82	707.91			0.0841	1.06	[K].ITLEQVTQLLEK.[E]	Q8R0W0 [867-878]	94313.8	45.4
	LTTIIEEAEETQESKPKPR		1	1	2	Q8R0W0	0	2199.15	733.721			4.383e-13	5.75	[R].LTTIIEEAEETQESKPKPR.[D]	Q8R0W0 [2571-2589]; [3086-3104]; [3601-3619]; [4116-4134]; [4631-4649]; [5146-5164]; [5661-5679]; [6176-6194]	7.56461e+06	26.96
	ITVPGPR		1	1	1	Q8R0W0	0	739.446	370.226			0.08046	1.26	[R].ITVPGPR.[G]	Q8R0W0 [1202-1208]	774702	20.45
	LVNAEMAAK		1	1	1	Q8R0W0	0	946.503	473.754			0.0003517	1.66	[R].LVNAEMAAK.[G]	Q8R0W0 [1976-1984]	550347	17.81
	NIVEQAAATAK		1	1	1	Q8R0W0	0	1115.61	558.305			0.0001227	2.35	[K].NIVEQAAATAK.[V]	Q8R0W0 [555-565]	1.43961e+06	22.68
	NQLGASTPSRPQAEAALPTTAR		1	1	1	Q8R0W0	0	2237.16	746.393			0.000848	2.52	[K].NQLGASTPSRPQAEAALPTTAR.[S]	Q8R0W0 [27-48]
	QQQEQTLR		1	1	1	Q8R0W0	0	1030.53	515.765			0.08429	0.63	[R].QQQEQTLR.[A]	Q8R0W0 [2621-2628]; [3136-3143]; [3651-3658]; [4166-4173]; [4681-4688]; [5196-5203]; [5711-5718]; [6226-6233]	493162	9.65
	REELLAQHLAGK		1	1	2	Q8R0W0	1	1364.76	455.593			3.706e-07	4.32	[R].REELLAQHLAGK.[L]	Q8R0W0 [2660-2671]; [3175-3186]; [3690-3701]; [4205-4216]; [4720-4731]; [5235-5246]; [5750-5761]; [6265-6276]	2.91801e+06	20.84
	RLSVEEAVAAGVVGGEIQEK		1	1	2	Q8R0W0	1	2041.09	681.037			5.119e-11	3.4	[R].RLSVEEAVAAGVVGGEIQEK.[L]	Q8R0W0 [2288-2307]; [2803-2822]; [3318-3337]; [3833-3852]; [4348-4367]; [4863-4882]; [5378-5397]; [5893-5912]; [6408-6427]	464660	34.47
	RLTTIIEEAEETQESKPKPR		1	1	2	Q8R0W0	1	2355.25	589.567			5.646e-13	4.73	[R].RLTTIIEEAEETQESKPKPR.[D]	Q8R0W0 [2570-2589]; [3085-3104]; [3600-3619]; [4115-4134]; [4630-4649]; [5145-5164]; [5660-5679]; [6175-6194]	2.44457e+06	27.29
	SFFQATVEHLVSK		1	1	1	Q8R0W0	0	1492.78	498.264			0.002018	0.85	[K].SFFQATVEHLVSK.[G]	Q8R0W0 [307-319]	587095	36.58
	SLEGGNFIAGVLIQDTK		1	1	1	Q8R0W0	0	1761.94	881.474			0.0008775	1.5	[R].SLEGGNFIAGVLIQDTK.[E]	Q8R0W0 [1574-1590]	284899	42.68
	SPETFPTPDGR		1	1	1	Q8R0W0	0	1203.56	602.285			0.0006438	2.5	[R].SPETFPTPDGR.[G]	Q8R0W0 [1088-1098]	1.85458e+06	22.73
	TIHEVTEMDSVK	1xOxidation [M8]	1	1	1	Q8R0W0	0	1404.67	468.894			0.03085	1.35	[K].TIHEVTEMDSVK.[R]	Q8R0W0 [2729-2740]; [3244-3255]; [3759-3770]; [4274-4285]; [4789-4800]; [5304-5315]; [5819-5830]; [6334-6345]	309673	16
	TIHEVTEMDSVKR		1	1	3	Q8R0W0	1	1544.77	515.595			5.88e-10	4.47	[K].TIHEVTEMDSVKR.[Y]	Q8R0W0 [2729-2741]; [3244-3256]; [3759-3771]; [4274-4286]; [4789-4801]; [5304-5316]; [5819-5831]; [6334-6346]	3.69295e+06	18.89
	TIHEVTEMDSVKR	1xOxidation [M8]	1	1	3	Q8R0W0	1	1560.77	520.927			1.097e-09	3.2	[K].TIHEVTEMDSVKR.[Y]	Q8R0W0 [2729-2741]; [3244-3256]; [3759-3771]; [4274-4286]; [4789-4801]; [5304-5316]; [5819-5831]; [6334-6346]	3.87394e+06	14.58
	TLVHPTTGQR		1	1	1	Q8R0W0	0	1109.61	555.306			0.04264	1.31	[R].TLVHPTTGQR.[L]	Q8R0W0 [334-343]	368549	13.41
	TQVTAEELLR		1	1	1	Q8R0W0	0	1159.63	580.319			0.003699	2.35	[R].TQVTAEELLR.[S]	Q8R0W0 [2187-2196]	1.70952e+06	28.59
	TTVDQIER		1	1	1	Q8R0W0	0	961.495	481.25			0.04345	1.57	[R].TTVDQIER.[K]	Q8R0W0 [2213-2220]	586100	16.56
	VLFSSYLSETR		1	1	1	Q8R0W0	0	1301.67	651.342			5.26e-05	2.96	[K].VLFSSYLSETR.[R]	Q8R0W0 [2649-2659]; [3164-3174]; [3679-3689]; [4194-4204]; [4709-4719]; [5224-5234]; [5739-5749]; [6254-6264]	4953276	34.79
	VPLDTACQR	1xCarbamidomethyl [C7]	1	1	1	Q8R0W0	0	1059.53	530.263			0.01386	1.68	[R].VPLDTACQR.[G]	Q8R0W0 [2033-2041]	314719	16.75
	VPVDVAYQR		1	1	1	Q8R0W0	0	1046.56	523.784			0.0001367	2.54	[R].VPVDVAYQR.[G]	Q8R0W0 [746-754]; [1707-1715]; [2365-2373]; [2880-2888]; [3395-3403]; [3910-3918]; [4425-4433]; [4940-4948]; [5455-5463]; [5970-5978]; [6485-6493]	30404850	21.99
	VSFPGLRR		1	1	1	Q8R0W0	1	931.547	311.186			0.06848	1.71	[K].VSFPGLRR.[Q]	Q8R0W0 [2695-2702]; [3210-3217]; [3725-3732]; [4240-4247]; [4755-4762]; [5270-5277]; [5785-5792]; [6300-6307]	1.49033e+06	24.16
	VTYQELQDR		1	1	1	Q8R0W0	0	1151.57	576.296			0.08925	1.73	[K].VTYQELQDR.[C]	Q8R0W0 [2071-2079]
	VTYQQLR		1	1	1	Q8R0W0	0	907.5	454.254			0.01884	1.86	[K].VTYQQLR.[E]	Q8R0W0 [1420-1426]	1.2402e+06	18.2
	VYLEGSNYIAGVIAPLTQK		1	1	1	Q8R0W0	0	2036.11	1018.55			0.02037	1.51	[R].VYLEGSNYIAGVIAPLTQK.[V]	Q8R0W0 [1899-1917]
	YLEGTGGLAGVVLLPGGHKK		1	1	1	Q8R0W0	1	1966.11	656.042			0.003821	1.04	[R].YLEGTGGLAGVVLLPGGHKK.[S]	Q8R0W0 [287-306]
	YLGGSSCIAGVLVPVQGEPGR	1xCarbamidomethyl [C7]	1	1	1	Q8R0W0	0	2116.09	706.034			0.01281	1.49	[R].YLGGSSCIAGVLVPVQGEPGR.[Q]	Q8R0W0 [2742-2762]; [3257-3277]; [3772-3792]; [4287-4307]; [4802-4822]; [5317-5337]; [5832-5852]; [6347-6367]
	YLGGSSCIAGVLVPVQGEPGRQEK	1xCarbamidomethyl [C7]	1	1	1	Q8R0W0	1	2501.28	834.433			3.893e-08	3.21	[R].YLGGSSCIAGVLVPVQGEPGRQEK.[M]	Q8R0W0 [2742-2765]; [3257-3280]; [3772-3795]; [4287-4310]; [4802-4825]; [5317-5340]; [5832-5855]; [6347-6370]	927436	34.69
	YLQGTGSIAGLLLPDSQER		1	1	2	Q8R0W0	0	2018.06	1009.53			5.768e-05	2.26	[R].YLQGTGSIAGLLLPDSQER.[L]	Q8R0W0 [613-631]	1.13174e+06	41.49
	YSVEEALR		1	1	1	Q8R0W0	0	966.489	483.748			0.01117	2.34	[R].YSVEEALR.[A]	Q8R0W0 [670-677]	1.51604e+06	25.19
	GFFDPNTHENLTYLQLLER		2	2	1	Q8R0W0; Q9QXS1	0	2307.14	769.718			9.675e-11	3.08	[K].GFFDPNTHENLTYLQLLER.[C]	Q8R0W0 [774-792]; [1735-1753]; Q9QXS1 [2996-3014]; [3655-3673]	842047	43.92
	LLEAQIATGGIIDPVHSHR		2	2	2	Q8R0W0; Q9QXS1	0	2027.1	676.374			1.51e-13	4.26	[R].LLEAQIATGGIIDPVHSHR.[V]	Q8R0W0 [1688-1706]; Q9QXS1 [2949-2967]	3.31816e+06	32.62
	ILSDPSDDTK		2	2	1	Q8R0W0; Q9QXS1	0	1090.53	545.766			4.473e-05	1.91	[R].ILSDPSDDTK.[G]	Q8R0W0 [1725-1734]; Q9QXS1 [2986-2995]	3007244	16.39
O35490	Betaine--homocysteine S-methyltransferase 1 OS=Mus musculus OX=10090 GN=Bhmt PE=1 SV=1	180.74	80	29	94	29	407	45	7.9
	Sequence	Modifications	# Protein Groups	# Proteins	# PSMs	Master Protein Accessions	# Missed Cleavages	Theo. MH+ [Da]	m/z [Da] (by Search Engine): Sequest HT			Percolator PEP (by Search Engine): Sequest HT	XCorr (by Search Engine): Sequest HT	Annotated Sequence	Positions in Master Proteins	Abundance: F5: Sample	Top Apex RT [min]
	AGASIVGVNCHFDPSVSLQTVK	1xCarbamidomethyl [C10]	1	1	3	O35490	0	2286.15	1143.58			8.358e-15	3.9	[K].AGASIVGVNCHFDPSVSLQTVK.[L]	O35490 [208-229]	21354044	34.84
	AGPWTPEAAVEHPEAVR		1	1	3	O35490	0	1816.9	606.305			6.05e-09	3.98	[K].AGPWTPEAAVEHPEAVR.[Q]	O35490 [41-57]	2.3349e+07	28.66
	AGSNVMQTFTFYASEDK	1xOxidation [M6]	1	1	1	O35490	0	1911.84	956.426			1.751e-06	1.45	[R].AGSNVMQTFTFYASEDK.[L]	O35490 [66-82]	297029	32.24
	AGSNVMQTFTFYASEDKLENR		1	1	2	O35490	1	2408.12	803.377			6.904e-13	5.32	[R].AGSNVMQTFTFYASEDKLENR.[G]	O35490 [66-86]	2.02194e+07	37.94
	AGSNVMQTFTFYASEDKLENR	1xOxidation [M6]	1	1	3	O35490	1	2424.11	808.706			9.749e-16	6.81	[R].AGSNVMQTFTFYASEDKLENR.[G]	O35490 [66-86]	2.33437e+07	32.91
	AIAEELAPER		1	2	7	O35490	0	1098.58	549.791			0.0008924	2.64	[R].AIAEELAPER.[G]	O35490 [309-318]	2.95808e+08	23.22
	AIAEELAPERGFLPPASEK		1	2	1	O35490	1	2025.07	675.694			0.0006584	1.88	[R].AIAEELAPERGFLPPASEK.[H]	O35490 [309-327]	298671	33.15
	ASGKPVAATMCIGPEGDLHGVPPGECAVR	2xCarbamidomethyl [C11; C26]	1	1	2	O35490	0	2933.41	734.11			9.57e-05	2.75	[K].ASGKPVAATMCIGPEGDLHGVPPGECAVR.[L]	O35490 [176-204]	451765	29.67
	ASGKPVAATMCIGPEGDLHGVPPGECAVR	2xCarbamidomethyl [C11; C26]; 1xOxidation [M10]	1	1	3	O35490	0	2949.4	738.108			5.787e-08	2.95	[K].ASGKPVAATMCIGPEGDLHGVPPGECAVR.[L]	O35490 [176-204]	1.4683e+06	26.64
	AYLMSQPLAYHTPDCGK	1xCarbamidomethyl [C15]	1	1	2	O35490	0	1951.9	651.307			7.613e-09	3.48	[K].AYLMSQPLAYHTPDCGK.[Q]	O35490 [242-258]	4.68226e+06	29.55
	AYLMSQPLAYHTPDCGK	1xCarbamidomethyl [C15]; 1xOxidation [M4]	1	1	3	O35490	0	1967.9	656.638			2.247e-08	3.53	[K].AYLMSQPLAYHTPDCGK.[Q]	O35490 [242-258]	8.29337e+06	26.01
	EATTEQQLR		1	1	4	O35490	0	1075.54	538.272			0.00276	2.1	[K].EATTEQQLR.[E]	O35490 [387-395]	5.55187e+07	12.79
	EATTEQQLRELFEK		1	1	1	O35490	1	1721.87	574.626			0.07224	1.05	[K].EATTEQQLRELFEK.[Q]	O35490 [387-400]	377259	33.77
	EAYNLGVR		1	1	1	O35490	0	921.479	461.242			0.0281	2.12	[R].EAYNLGVR.[Y]	O35490 [287-294]	208050720	21.67
	EGLEAARLK		1	1	1	O35490	1	986.563	493.785			0.07093	1	[K].EGLEAARLK.[A]	O35490 [233-241]
	GAAELMQQK		1	1	1	O35490	0	975.493	488.249			0.001339	1.79	[K].GAAELMQQK.[E]	O35490 [378-386]	49879188	17.69
	GAAELMQQK	1xOxidation [M6]	1	1	7	O35490	0	991.488	496.247			0.004679	1.79	[K].GAAELMQQK.[E]	O35490 [378-386]	2.09478e+07	11.19
	GFLPPASEK		1	2	8	O35490	0	945.504	473.254			0.01504	1.54	[R].GFLPPASEK.[H]	O35490 [319-327]	4.91922e+07	23.49
	GNYVAEKISGQK		1	1	1	O35490	1	1293.68	647.345			0.02154	1.42	[R].GNYVAEKISGQK.[V]	O35490 [87-98]	307424	24.83
	HGSWGSGLDMHTKPWIR	1xOxidation [M10]	1	1	1	O35490	0	1980.95	495.992			0.003672	2.41	[K].HGSWGSGLDMHTKPWIR.[A]	O35490 [328-344]
	KEYWQNLR		1	1	1	O35490	1	1136.58	568.797			0.00667	2.51	[R].KEYWQNLR.[I]	O35490 [349-356]	5799531	22.76
	IASGRPYNPSMSRPDAWGVTK		1	1	2	O35490	0	2290.14	764.052			1.057e-06	2.34	[R].IASGRPYNPSMSRPDAWGVTK.[G]	O35490 [357-377]	1.47205e+06	26
	IASGRPYNPSMSRPDAWGVTK	1xOxidation [M11]	1	1	6	O35490	0	2306.13	769.382			0.001807	2.1	[R].IASGRPYNPSMSRPDAWGVTK.[G]	O35490 [357-377]	3.37988e+06	23.63
	LKAYLMSQPLAYHTPDCGK	1xCarbamidomethyl [C17]	1	1	1	O35490	1	2193.08	731.697			1.028e-08	2.79	[R].LKAYLMSQPLAYHTPDCGK.[Q]	O35490 [240-258]	505786	29.4
	LKAYLMSQPLAYHTPDCGK	1xCarbamidomethyl [C17]; 1xOxidation [M6]	1	1	3	O35490	1	2209.08	737.031			1.186e-09	3.28	[R].LKAYLMSQPLAYHTPDCGK.[Q]	O35490 [240-258]	1.99534e+06	26.24
	LMKEGLEAAR		1	1	2	O35490	1	1117.6	373.205			0.0005937	3.1	[K].LMKEGLEAAR.[L]	O35490 [230-239]	1.15724e+07	17.72
	LMKEGLEAAR	1xOxidation [M2]	1	1	2	O35490	1	1133.6	378.537			0.001984	2.56	[K].LMKEGLEAAR.[L]	O35490 [230-239]	1.29813e+07	14.57
	LNAGEVVIGDGGFVFALEK		1	1	3	O35490	0	1935.02	968.016			7.61e-09	2.61	[R].LNAGEVVIGDGGFVFALEK.[R]	O35490 [17-35]	2.00623e+06	45.92
	LNAGEVVIGDGGFVFALEKR		1	1	1	O35490	1	2091.12	697.713			2.833e-08	2.18	[R].LNAGEVVIGDGGFVFALEKR.[G]	O35490 [17-36]	511904	42.73
	QGFIDLPEFPFGLEPR		1	1	4	O35490	0	1861.95	931.478			3.989e-06	2.36	[K].QGFIDLPEFPFGLEPR.[V]	O35490 [259-274]	9257289	50.84
	QQLEVFMK		1	1	1	O35490	0	1022.53	511.77			0.008762	2.33	[R].QQLEVFMK.[K]	O35490 [143-150]	31321554	28.72
	QQLEVFMK	1xOxidation [M7]	1	1	3	O35490	0	1038.53	519.768			0.009796	2.15	[R].QQLEVFMK.[K]	O35490 [143-150]	21186966	24.2
	QQLEVFMKK		1	1	2	O35490	1	1150.63	384.214			2.307e-05	2.86	[R].QQLEVFMKK.[N]	O35490 [143-151]	4.79873e+06	23.9
	QQLEVFMKK	1xOxidation [M7]	1	1	2	O35490	1	1166.62	389.546			0.0003934	2.41	[R].QQLEVFMKK.[N]	O35490 [143-151]	8.43073e+06	20.16
	QVADEGDALVAGGVSQTPSYLSCK	1xCarbamidomethyl [C23]	1	1	3	O35490	0	2452.17	1226.58			8.627e-15	4.99	[R].QVADEGDALVAGGVSQTPSYLSCK.[S]	O35490 [109-132]	8.37412e+06	33.58
	SEVEVKK		1	1	1	O35490	1	818.462	409.734			0.07143	1.88	[K].SEVEVKK.[I]	O35490 [133-139]	7.79251e+06	6.62
	VNEAACDIAR	1xCarbamidomethyl [C6]	1	1	1	O35490	0	1118.53	559.765			0.0002717	2.68	[K].VNEAACDIAR.[Q]	O35490 [99-108]	44111800	16.87
	YIGGCCGFEPYHIR	2xCarbamidomethyl [C5; C6]	1	2	1	O35490	0	1728.76	576.923			2.248e-06	2.39	[R].YIGGCCGFEPYHIR.[A]	O35490 [295-308]	3.50926e+06	29.15
P38647	Stress-70 protein, mitochondrial OS=Mus musculus OX=10090 GN=Hspa9 PE=1 SV=3	171.97	50	35	76	35	679	73.4	6.07
	Sequence	Modifications	# Protein Groups	# Proteins	# PSMs	Master Protein Accessions	# Missed Cleavages	Theo. MH+ [Da]	m/z [Da] (by Search Engine): Sequest HT			Percolator PEP (by Search Engine): Sequest HT	XCorr (by Search Engine): Sequest HT	Annotated Sequence	Positions in Master Proteins	Abundance: F5: Sample	Top Apex RT [min]
	ALLAGKDSETGENIR		1	1	3	P38647	1	1573.82	525.278			2.39e-09	4.23	[R].ALLAGKDSETGENIR.[Q]	P38647 [620-634]	8.40741e+06	20.46
	AMQDAEVSK		1	1	1	P38647	0	978.456	489.731			0.01128	1.47	[K].AMQDAEVSK.[S]	P38647 [369-377]	775714	12.16
	AMQDAEVSKSDIGEVILVGGMTR	1xOxidation [M2]	1	1	1	P38647	1	2422.2	808.069			1.346e-09	3.43	[K].AMQDAEVSKSDIGEVILVGGMTR.[M]	P38647 [369-391]	625136	36.14
	AMQDAEVSKSDIGEVILVGGMTR	2xOxidation [M2; M21]	1	1	1	P38647	1	2438.19	813.401			7.189e-11	3.93	[K].AMQDAEVSKSDIGEVILVGGMTR.[M]	P38647 [369-391]	2.21072e+06	32.91
	AQFEGIVTDLIK		1	1	1	P38647	0	1333.74	667.369			5.436e-05	2.45	[R].AQFEGIVTDLIK.[R]	P38647 [349-360]	5482273	41.08
	AQFEGIVTDLIKR		1	1	2	P38647	1	1489.84	497.284			2.806e-08	3.03	[R].AQFEGIVTDLIKR.[T]	P38647 [349-361]	9.50822e+06	37.73
	DAGQISGLNVLR		1	1	2	P38647	0	1242.68	621.843			7.537e-06	3.3	[K].DAGQISGLNVLR.[V]	P38647 [207-218]	25099252	32.62
	DSETGENIR		1	1	1	P38647	0	1020.46	510.732			0.006011	2.01	[K].DSETGENIR.[Q]	P38647 [626-634]	1.65119e+06	12.01
	EQQIVIQSSGGLSK		1	1	1	P38647	0	1473.79	737.4			5.558e-07	3.03	[R].EQQIVIQSSGGLSK.[D]	P38647 [542-555]	870639	24.21
	EQQIVIQSSGGLSKDDIENMVK		1	1	1	P38647	1	2418.22	806.745			1.311e-11	3.34	[R].EQQIVIQSSGGLSKDDIENMVK.[N]	P38647 [542-563]
	EQQIVIQSSGGLSKDDIENMVK	1xOxidation [M20]	1	1	1	P38647	1	2434.21	812.075			6.565e-13	4.86	[R].EQQIVIQSSGGLSKDDIENMVK.[N]	P38647 [542-563]	2.00294e+06	28.79
	ERVEAVNMAEGIIHDTETK		1	1	1	P38647	1	2142.05	714.681			5.634e-10	3.76	[K].ERVEAVNMAEGIIHDTETK.[M]	P38647 [577-595]	330472	33.76
	ERVEAVNMAEGIIHDTETK	1xOxidation [M8]	1	1	1	P38647	1	2158.04	720.017			1.561e-07	2.63	[K].ERVEAVNMAEGIIHDTETK.[M]	P38647 [577-595]	465006	27.81
	ETGVDLTK		1	1	1	P38647	0	862.452	431.728			0.02386	1.69	[R].ETGVDLTK.[D]	P38647 [293-300]	3.09329e+06	16.67
	ETGVDLTKDNMALQR		1	1	2	P38647	1	1690.84	845.926			1.579e-07	2.95	[R].ETGVDLTKDNMALQR.[V]	P38647 [293-307]	3.41787e+06	26.08
	ETGVDLTKDNMALQR	1xOxidation [M11]	1	1	2	P38647	1	1706.84	569.616			1.553e-07	4.39	[R].ETGVDLTKDNMALQR.[V]	P38647 [293-307]	7.05568e+06	22.48
	KSQVFSTAADGQTQVEIK		1	1	1	P38647	1	1937	646.338			0.0002337	1.79	[K].KSQVFSTAADGQTQVEIK.[V]	P38647 [468-485]	377891	24.6
	LFEMAYKK		1	1	2	P38647	1	1029.54	515.276			0.01496	2	[K].LFEMAYKK.[M]	P38647 [647-654]	5381461	23.61
	LLGQFTLIGIPPAPR		1	1	5	P38647	0	1592.95	796.98			1.292e-08	3.57	[K].LLGQFTLIGIPPAPR.[G]	P38647 [499-513]	1757024	44.87
	LVGMPAKR	1xOxidation [M4]	1	1	1	P38647	1	887.513	444.259			0.06994	1.23	[R].LVGMPAKR.[Q]	P38647 [100-107]	1.07415e+06	9.48
	LYSPSQIGAFVLMK	1xOxidation [M13]	1	1	5	P38647	0	1569.83	785.42			1.252e-06	2.75	[K].LYSPSQIGAFVLMK.[M]	P38647 [160-173]	4.84399e+06	40.7
	MKETAENYLGHTAK		1	1	3	P38647	1	1592.77	796.889			2.211e-07	2.99	[K].MKETAENYLGHTAK.[N]	P38647 [174-187]	3.74946e+06	17.99
	MKETAENYLGHTAK	1xOxidation [M1]	1	1	3	P38647	1	1608.77	536.927			9.968e-10	2.24	[K].MKETAENYLGHTAK.[N]	P38647 [174-187]	4.35903e+06	16.22
	NAEKYAEEDRR		1	1	1	P38647	2	1380.65	460.888			0.002384	1.71	[K].NAEKYAEEDRR.[K]	P38647 [564-574]	344600	10.48
	NAVITVPAYFNDSQR		1	1	3	P38647	0	1694.85	847.927			3.294e-06	2.72	[K].NAVITVPAYFNDSQR.[Q]	P38647 [188-202]	1.07951e+07	35.12
	NTTIPTKK		1	1	1	P38647	1	902.531	451.768			0.02002	1.75	[R].NTTIPTKK.[S]	P38647 [461-468]	1.86216e+06	9.13
	QAASSLQQASLK		1	1	1	P38647	0	1231.66	616.336			2.467e-06	3.63	[R].QAASSLQQASLK.[L]	P38647 [635-646]	9644285	19.08
	QAVTNPNNTFYATK		1	1	1	P38647	0	1568.77	784.889			1.069e-08	3.65	[R].QAVTNPNNTFYATK.[R]	P38647 [108-121]	4594373	22.7
	QAVTNPNNTFYATKR		1	1	1	P38647	1	1724.87	575.63			2.581e-09	4.53	[R].QAVTNPNNTFYATKR.[L]	P38647 [108-122]	1.01026e+06	20.34
	RYDDPEVQKDTK		1	1	2	P38647	2	1493.72	747.364			2.1e-06	2.63	[R].RYDDPEVQKDTK.[N]	P38647 [127-138]	4.21741e+06	12.44
	SDIGEVILVGGMTR		1	1	1	P38647	0	1446.76	723.886			9.45e-09	3.27	[K].SDIGEVILVGGMTR.[M]	P38647 [378-391]	1.62714e+06	37.96
	SDIGEVILVGGMTR	1xOxidation [M12]	1	1	2	P38647	0	1462.76	731.882			1.966e-07	3.29	[K].SDIGEVILVGGMTR.[M]	P38647 [378-391]	4.06448e+06	33.79
	SQVFSTAADGQTQVEIK		1	1	3	P38647	0	1808.9	904.954			2.714e-10	4.09	[K].SQVFSTAADGQTQVEIK.[V]	P38647 [469-485]	4.55092e+06	27.87
	STNGDTFLGGEDFDQALLR		1	1	2	P38647	0	2055.96	1028.49			9.292e-10	3.53	[K].STNGDTFLGGEDFDQALLR.[H]	P38647 [266-284]	1810645	41.1
	TTPSVVAFTADGER		1	1	4	P38647	0	1450.72	725.861			1.38e-05	3.06	[R].TTPSVVAFTADGER.[L]	P38647 [86-99]	2.0992e+07	29.02
	VEAVNMAEGIIHDTETK	1xOxidation [M6]	1	1	2	P38647	0	1872.9	624.97			2.322e-06	2.55	[R].VEAVNMAEGIIHDTETK.[M]	P38647 [579-595]	927414	28.7
	VLENAEGAR		1	1	2	P38647	0	958.495	479.749			0.002859	2.33	[K].VLENAEGAR.[T]	P38647 [77-85]	1.17002e+07	13.32
	VINEPTAAALAYGLDK		1	1	3	P38647	0	1645.88	823.441			1.216e-08	4.02	[R].VINEPTAAALAYGLDK.[S]	P38647 [219-234]	5.76669e+06	35.45
	VINEPTAAALAYGLDKSEDK		1	1	1	P38647	1	2105.08	702.36			7.874e-14	4.48	[R].VINEPTAAALAYGLDKSEDK.[V]	P38647 [219-238]	1792862	33.25
	VQQTVQDLFGR		1	1	2	P38647	0	1290.68	645.842			0.0004806	2.83	[K].VQQTVQDLFGR.[A]	P38647 [395-405]	21833374	30.62
	YDDPEVQKDTK		1	1	2	P38647	1	1337.62	669.313			8.314e-05	2.02	[R].YDDPEVQKDTK.[N]	P38647 [128-138]	746420	13.7
Q99JY0	Trifunctional enzyme subunit beta, mitochondrial OS=Mus musculus OX=10090 GN=Hadhb PE=1 SV=1	162.82	66	32	97	32	475	51.4	9.38
	Sequence	Modifications	# Protein Groups	# Proteins	# PSMs	Master Protein Accessions	# Missed Cleavages	Theo. MH+ [Da]	m/z [Da] (by Search Engine): Sequest HT			Percolator PEP (by Search Engine): Sequest HT	XCorr (by Search Engine): Sequest HT	Annotated Sequence	Positions in Master Proteins	Abundance: F5: Sample	Top Apex RT [min]
	AALSGLLHR		1	1	5	Q99JY0	0	937.558	313.19			6.313e-05	2.64	[R].AALSGLLHR.[T]	Q99JY0 [83-91]	9.63326e+07	25.09
	AGLTMNDIDAFEFHEAFSGQILANFK	1xOxidation [M5]	1	1	1	Q99JY0	0	2902.37	968.127			0.04121	1.08	[K].AGLTMNDIDAFEFHEAFSGQILANFK.[A]	Q99JY0 [367-392]	263530	46.58
	ALAMGYKPK		1	1	2	Q99JY0	0	978.544	326.852			0.0004065	2.51	[R].ALAMGYKPK.[A]	Q99JY0 [327-335]	28101837	18.2
	ALAMGYKPK	1xOxidation [M4]	1	1	3	Q99JY0	0	994.539	332.184			7.091e-05	2.57	[R].ALAMGYKPK.[A]	Q99JY0 [327-335]	20664984	13.69
	AMDSDWFAQNYMGR	1xOxidation [M2]	1	1	1	Q99JY0	0	1707.69	854.347			1.415e-07	2.71	[K].AMDSDWFAQNYMGR.[K]	Q99JY0 [393-406]
	AMDSDWFAQNYMGR	2xOxidation [M2; M12]	1	1	1	Q99JY0	0	1723.68	862.345			4.408e-08	2.81	[K].AMDSDWFAQNYMGR.[K]	Q99JY0 [393-406]	937591	30.22
	AQDEGHLSDIVPFK		1	1	2	Q99JY0	0	1555.78	778.391			7.339e-06	3.18	[K].AQDEGHLSDIVPFK.[V]	Q99JY0 [256-269]	2.73326e+06	31.61
	AQDEGHLSDIVPFKVPGK		1	1	3	Q99JY0	1	1937.01	646.344			7.593e-07	3.31	[K].AQDEGHLSDIVPFKVPGK.[D]	Q99JY0 [256-273]	7.19246e+06	33.17
	AQDEGHLSDIVPFKVPGKDTVTK		1	1	3	Q99JY0	2	2481.3	827.769			2.726e-14	5.26	[K].AQDEGHLSDIVPFKVPGKDTVTK.[D]	Q99JY0 [256-278]	6.70672e+06	31.65
	DFIYVSQDPK		1	1	1	Q99JY0	0	1211.59	606.301			0.000738	2.35	[R].DFIYVSQDPK.[D]	Q99JY0 [340-349]	14145628	28.16
	DFIYVSQDPKDQLLLGPTYATPK		1	1	4	Q99JY0	1	2609.35	870.457			4.765e-11	4.08	[R].DFIYVSQDPKDQLLLGPTYATPK.[V]	Q99JY0 [340-362]	1.6181e+07	40.48
	DGGQYALVAACAAGGQGHAMIVEAYPK	1xCarbamidomethyl [C11]	1	1	1	Q99JY0	0	2705.28	902.431			5.591e-09	1.62	[K].DGGQYALVAACAAGGQGHAMIVEAYPK.[-]	Q99JY0 [449-475]	704927	36.33
	DGGQYALVAACAAGGQGHAMIVEAYPK	1xCarbamidomethyl [C11]; 1xOxidation [M20]	1	1	1	Q99JY0	0	2721.28	907.763			1.038e-13	4.83	[K].DGGQYALVAACAAGGQGHAMIVEAYPK.[-]	Q99JY0 [449-475]	1.25214e+06	33.19
	DLMPHDLAR		1	1	3	Q99JY0	0	1067.53	356.514			0.003565	1.55	[K].DLMPHDLAR.[A]	Q99JY0 [74-82]	1.38507e+07	25.07
	DLMPHDLAR	1xOxidation [M3]	1	1	3	Q99JY0	0	1083.53	361.846			0.003286	2.23	[K].DLMPHDLAR.[A]	Q99JY0 [74-82]	24211449	18.88
	DNGIRPSSLEQMAK		1	1	2	Q99JY0	0	1545.77	515.928			4.279e-06	2.53	[K].DNGIRPSSLEQMAK.[L]	Q99JY0 [279-292]	6.64859e+06	26.28
	DNGIRPSSLEQMAK	1xOxidation [M12]	1	1	2	Q99JY0	0	1561.76	781.386			1.491e-05	2.92	[K].DNGIRPSSLEQMAK.[L]	Q99JY0 [279-292]	6.60306e+06	20.79
	DQLLLGPTYATPK		1	1	2	Q99JY0	0	1416.77	708.891			7.974e-06	2.82	[K].DQLLLGPTYATPK.[V]	Q99JY0 [350-362]	16839168	32.91
	DVVDYIIFGTVIQEVK		1	1	2	Q99JY0	0	1837.99	919.501			3.755e-09	4.43	[K].DVVDYIIFGTVIQEVK.[T]	Q99JY0 [97-112]	1.27636e+06	51.95
	EAALGAGFSDK		1	1	2	Q99JY0	0	1065.52	533.263			0.0008372	1.39	[R].EAALGAGFSDK.[T]	Q99JY0 [119-129]	39014500	22.47
	FRLNFLSPELPAVAEFSTNETMGHSADR	1xOxidation [M22]	1	1	1	Q99JY0	1	3152.51	788.885			0.006315	1.18	[K].FRLNFLSPELPAVAEFSTNETMGHSADR.[L]	Q99JY0 [203-230]	178025	43.93
	KAQDEGHLSDIVPFK		1	1	2	Q99JY0	1	1683.87	561.961			8.445e-09	3.5	[K].KAQDEGHLSDIVPFK.[V]	Q99JY0 [255-269]	3.63781e+06	28.75
	KAQDEGHLSDIVPFKVPGK		1	1	3	Q99JY0	2	2065.11	689.039			1.286e-16	5.48	[K].KAQDEGHLSDIVPFKVPGK.[D]	Q99JY0 [255-273]	1.23496e+07	30.82
	KMMLDLNK	1xOxidation [M]	1	1	2	Q99JY0	1	1008.52	504.764			0.0002238	2.92	[R].KMMLDLNK.[A]	Q99JY0 [182-189]	8.34753e+06	19.69
	KMMLDLNK	2xOxidation [M2; M3]	1	1	3	Q99JY0	1	1024.52	512.762			0.04916	1.22	[R].KMMLDLNK.[A]	Q99JY0 [182-189]	2.35399e+06	14.37
	KTLAKPNMK		1	1	1	Q99JY0	1	1030.61	515.807			0.00575	1.72	[K].KTLAKPNMK.[N]	Q99JY0 [45-53]	348233	9.98
	LAAAFAVSR		1	1	2	Q99JY0	0	905.52	453.263			0.004011	2.77	[R].LAAAFAVSR.[M]	Q99JY0 [231-239]	79883464	25.01
	LKPAFIKPYGTVTAANSSFLTDGASAMLIMSEDR		1	1	1	Q99JY0	0	3602.82	901.459			0.01145	0.79	[K].LKPAFIKPYGTVTAANSSFLTDGASAMLIMSEDR.[A]	Q99JY0 [293-326]	196533	44.88
	LKPAFIKPYGTVTAANSSFLTDGASAMLIMSEDR	1xOxidation [M30]	1	1	1	Q99JY0	0	3618.82	905.453			0.01995	1.75	[K].LKPAFIKPYGTVTAANSSFLTDGASAMLIMSEDR.[A]	Q99JY0 [293-326]	442130	41.93
	LKPAFIKPYGTVTAANSSFLTDGASAMLIMSEDR	2xOxidation [M27; M30]	1	1	1	Q99JY0	0	3634.81	909.46			1.335e-05	2.43	[K].LKPAFIKPYGTVTAANSSFLTDGASAMLIMSEDR.[A]	Q99JY0 [293-326]	1.89437e+06	38.65
	LNFLSPELPAVAEFSTNETMGHSADR		1	1	1	Q99JY0	0	2833.35	945.121			2.592e-10	4.09	[R].LNFLSPELPAVAEFSTNETMGHSADR.[L]	Q99JY0 [205-230]	1.0519e+06	44.39
	LNFLSPELPAVAEFSTNETMGHSADR	1xOxidation [M20]	1	1	4	Q99JY0	0	2849.34	950.446			2.62e-08	3.37	[R].LNFLSPELPAVAEFSTNETMGHSADR.[L]	Q99JY0 [205-230]	8.05331e+06	43.18
	IPFLLSGTSYK		1	1	4	Q99JY0	0	1225.68	613.344			5.273e-06	2.92	[R].IPFLLSGTSYK.[D]	Q99JY0 [63-73]	4.85001e+07	37.07
	IPFLLSGTSYKDLMPHDLAR		1	1	3	Q99JY0	1	2274.2	758.738			1.482e-07	1.88	[R].IPFLLSGTSYKDLMPHDLAR.[A]	Q99JY0 [63-82]	1.7233e+06	41.91
	IPFLLSGTSYKDLMPHDLAR	1xOxidation [M14]	1	1	2	Q99JY0	1	2290.19	573.301			1.243e-10	4.64	[R].IPFLLSGTSYKDLMPHDLAR.[A]	Q99JY0 [63-82]	1.35325e+07	37.82
	LVMAAANR		1	1	1	Q99JY0	0	845.466	423.236			0.02035	2.1	[R].LVMAAANR.[L]	Q99JY0 [438-445]	28174866	17.03
	LVMAAANR	1xOxidation [M3]	1	1	2	Q99JY0	0	861.461	431.233			0.02785	1.4	[R].LVMAAANR.[L]	Q99JY0 [438-445]	7.20966e+06	11.52
	MEQDEYALR		1	1	1	Q99JY0	0	1154.51	577.763			0.003294	2.54	[R].MEQDEYALR.[S]	Q99JY0 [240-248]	14812025	21.23
	MEQDEYALR	1xOxidation [M1]	1	1	5	Q99JY0	0	1170.51	585.757			0.0005063	2.81	[R].MEQDEYALR.[S]	Q99JY0 [240-248]	3.01222e+07	19.1
	MMLDLNK	1xOxidation [M1]	1	1	1	Q99JY0	0	880.427	440.716			0.04778	1.37	[K].MMLDLNK.[A]	Q99JY0 [183-189]	5.38257e+06	22.46
	MMLDLNK	2xOxidation [M1; M2]	1	1	2	Q99JY0	0	896.422	448.714			0.05239	1.89	[K].MMLDLNK.[A]	Q99JY0 [183-189]	2.85548e+06	17.59
	NIVVVEGVR		1	1	2	Q99JY0	0	984.584	492.796			0.01207	1.58	[K].NIVVVEGVR.[I]	Q99JY0 [54-62]	7.96553e+07	25.61
	TLAKPNMK		1	1	2	Q99JY0	0	902.513	451.76			0.03831	1.46	[K].TLAKPNMK.[N]	Q99JY0 [46-53]	3.89428e+06	12.76
	TLAKPNMK	1xOxidation [M7]	1	1	2	Q99JY0	0	918.508	306.84			0.000138	2.06	[K].TLAKPNMK.[N]	Q99JY0 [46-53]	4.71504e+06	6.89
	VGSPPLEK		1	1	3	Q99JY0	0	826.467	413.736			0.0133	2.42	[K].VGSPPLEK.[F]	Q99JY0 [410-417]	16199159	16.01
	VPGKDTVTK		1	1	1	Q99JY0	1	944.541	315.517			0.02844	1.22	[K].VPGKDTVTK.[D]	Q99JY0 [270-278]	893837	9.83
Q7TPR4	Alpha-actinin-1 OS=Mus musculus OX=10090 GN=Actn1 PE=1 SV=1	137.86	45	36	71	22	892	103	5.38
	Sequence	Modifications	# Protein Groups	# Proteins	# PSMs	Master Protein Accessions	# Missed Cleavages	Theo. MH+ [Da]	m/z [Da] (by Search Engine): Sequest HT			Percolator PEP (by Search Engine): Sequest HT	XCorr (by Search Engine): Sequest HT	Annotated Sequence	Positions in Master Proteins	Abundance: F5: Sample	Top Apex RT [min]
	ALDFIASK		2	3	2	P57780; Q7TPR4	0	864.483	432.744			0.002037	2.06	[K].ALDFIASK.[G]	P57780 [116-123]; Q7TPR4 [96-103]	22639940	27.55
	AIMTYVSSFYHAFSGAQK		2	2	1	P57780; Q7TPR4	0	2007.96	1004.49			3.113e-07	2.71	[K].AIMTYVSSFYHAFSGAQK.[A]	P57780 [257-274]; Q7TPR4 [237-254]	188225	43.33
	AIMTYVSSFYHAFSGAQK	1xOxidation [M3]	2	2	4	P57780; Q7TPR4	0	2023.96	675.323			9.707e-14	4.15	[K].AIMTYVSSFYHAFSGAQK.[A]	P57780 [257-274]; Q7TPR4 [237-254]	4.80121e+06	38.75
	ASIHEAWTDGK		2	2	2	P57780; Q7TPR4	0	1214.58	607.789			0.01325	1.32	[K].ASIHEAWTDGK.[E]	P57780 [423-433]; Q7TPR4 [403-413]	1.08547e+06	19.24
	ELPPDQAEYCIAR	1xCarbamidomethyl [C10]	2	2	5	P57780; Q7TPR4	0	1561.73	781.37			9.843e-06	1.67	[R].ELPPDQAEYCIAR.[M]	P57780 [871-883]; Q7TPR4 [851-863]	1.99165e+06	26.72
	FAIQDISVEETSAK		2	4	1	P57780; Q7TPR4	0	1537.77	769.387			2.82e-07	3.83	[R].FAIQDISVEETSAK.[E]	P57780 [154-167]; Q7TPR4 [134-147]	14317981	32.71
	GYEEWLLNEIR		2	3	1	P57780; Q7TPR4	0	1421.71	711.357			0.002876	1.73	[K].GYEEWLLNEIR.[R]	P57780 [397-407]; Q7TPR4 [377-387]	120789	42.45
	HEAFESDLAAHQDR		2	4	1	P57780; Q7TPR4	0	1625.73	542.581			0.01347	1.49	[RK].HEAFESDLAAHQDR.[V]	P57780 [457-470]; Q7TPR4 [437-450]
	KHEAFESDLAAHQDR		2	3	2	P57780; Q7TPR4	1	1753.83	585.279			6.876e-13	5.14	[RK].KHEAFESDLAAHQDR.[V]	P57780 [456-470]; Q7TPR4 [436-450]	2.24471e+06	16.89
	LASDLLEWIR		2	2	1	P57780; Q7TPR4	0	1215.67	608.341			0.02455	1.47	[RK].LASDLLEWIR.[R]	P57780 [302-311]; Q7TPR4 [282-291]	497713	44.17
	LDHLAEK		2	2	1	P57780; Q7TPR4	0	825.446	413.227			0.0105	1.13	[R].LDHLAEK.[F]	P57780 [412-418]; Q7TPR4 [392-398]	3851638	10.83
	LERLDHLAEK		2	2	1	P57780; Q7TPR4	1	1223.67	408.563			0.02614	1.44	[R].LERLDHLAEK.[F]	P57780 [409-418]; Q7TPR4 [389-398]	442269	18.97
	LSNRPAFMPSEGR		2	2	3	P57780; Q7TPR4	0	1461.73	731.365			4.389e-06	3.03	[R].LSNRPAFMPSEGR.[M]	P57780 [367-379]; Q7TPR4 [347-359]	1.00947e+07	22.99
	LSNRPAFMPSEGR	1xOxidation [M8]	2	2	3	P57780; Q7TPR4	0	1477.72	493.244			0.0001025	2.8	[R].LSNRPAFMPSEGR.[M]	P57780 [367-379]; Q7TPR4 [347-359]	1.09416e+07	18.59
	TINEVENQILTR		2	2	2	P57780; Q7TPR4	0	1429.76	477.26			0.0001135	2.6	[R].TINEVENQILTR.[D]	P57780 [747-758]; Q7TPR4 [727-738]	2.43102e+07	30.15
	VGWEQLLTTIAR		2	2	2	P57780; Q7TPR4	0	1386.77	693.893			5.894e-06	2.43	[R].VGWEQLLTTIAR.[T]	P57780 [735-746]; Q7TPR4 [715-726]	1.11014e+06	46.99
	AGTQIENIEEDFRDGLK		1	1	2	Q7TPR4	1	1934.95	645.652			6.545e-10	3.81	[K].AGTQIENIEEDFRDGLK.[L]	Q7TPR4 [48-64]	1.6742e+06	36.96
	ASFNHFDRDHSGTLGPEEFK		1	1	1	Q7TPR4	1	2291.05	573.518			3.261e-07	3.42	[R].ASFNHFDRDHSGTLGPEEFK.[A]	Q7TPR4 [753-772]	1.06475e+06	25.74
	ATLPDADKER		1	1	4	Q7TPR4	1	1115.57	372.527			0.0003665	2.02	[K].ATLPDADKER.[L]	Q7TPR4 [556-565]	4020781	14.43
	DDPLTNLNTAFDVAER		1	1	1	Q7TPR4	0	1790.86	895.929			7.063e-05	2.14	[K].DDPLTNLNTAFDVAER.[F]	Q7TPR4 [199-214]	869073	41.53
	DYETATLSEIK		1	1	1	Q7TPR4	0	1269.62	635.313			0.0001549	2.41	[K].DYETATLSEIK.[A]	Q7TPR4 [421-431]	1.34433e+06	29.38
	ETADTDTADQVMASFK		1	1	1	Q7TPR4	0	1729.76	865.383			2.833e-08	3.24	[R].ETADTDTADQVMASFK.[I]	Q7TPR4 [819-834]	843743	33.04
	ETADTDTADQVMASFK	1xOxidation [M12]	1	1	1	Q7TPR4	0	1745.75	873.381			5.849e-07	3.27	[R].ETADTDTADQVMASFK.[I]	Q7TPR4 [819-834]	1.17089e+06	25.3
	GISQEQMNEFR		1	1	1	Q7TPR4	0	1338.61	669.807			0.000484	2.81	[K].GISQEQMNEFR.[A]	Q7TPR4 [742-752]	2.45743e+06	24.5
	GISQEQMNEFR	1xOxidation [M7]	1	1	1	Q7TPR4	0	1354.61	677.805			0.0002462	2.41	[K].GISQEQMNEFR.[A]	Q7TPR4 [742-752]	2.43909e+06	19.18
	HRPELIDYGK		1	1	2	Q7TPR4	0	1227.65	409.888			6.002e-09	4.52	[R].HRPELIDYGK.[L]	Q7TPR4 [186-195]	6.80131e+06	19.28
	HTNYNMEHIR		1	1	2	Q7TPR4	0	1314.6	438.871			8.237e-05	3.62	[K].HTNYNMEHIR.[V]	Q7TPR4 [705-714]	1.3139e+06	15.37
	HTNYNMEHIR	1xOxidation [M6]	1	1	1	Q7TPR4	0	1330.6	444.202			0.001799	2.24	[K].HTNYNMEHIR.[V]	Q7TPR4 [705-714]	1.17625e+06	11.04
	KDDPLTNLNTAFDVAER		1	1	2	Q7TPR4	1	1918.95	959.976			1.809e-07	2.95	[R].KDDPLTNLNTAFDVAER.[F]	Q7TPR4 [198-214]	1.29938e+06	36.38
	LAILGIHNEVSK		1	1	2	Q7TPR4	0	1293.75	647.379			1.122e-07	3.05	[R].LAILGIHNEVSK.[I]	Q7TPR4 [566-577]	1.13319e+07	28.45
	IDQLECDHQLIQEALIFDNK	1xCarbamidomethyl [C6]	1	1	1	Q7TPR4	0	2442.2	814.736			0.003408	1.05	[K].IDQLECDHQLIQEALIFDNK.[H]	Q7TPR4 [685-704]
	ILAGDKNYITEDELR		1	1	2	Q7TPR4	1	1749.9	875.454			1.088e-05	2.39	[K].ILAGDKNYITEDELR.[R]	Q7TPR4 [835-849]
	ILAGDKNYITEDELRR		1	1	2	Q7TPR4	2	1906	636.005			1.071e-07	2.87	[K].ILAGDKNYITEDELRR.[E]	Q7TPR4 [835-850]	3.73989e+06	25.59
	IMSIVDPNR	1xOxidation [M2]	1	1	1	Q7TPR4	0	1060.55	530.775			0.001573	1.62	[R].IMSIVDPNR.[L]	Q7TPR4 [795-803]	708328	21.45
	LRKDDPLTNLNTAFDVAER		1	1	1	Q7TPR4	2	2188.14	730.05			1.36e-06	2.96	[K].LRKDDPLTNLNTAFDVAER.[F]	Q7TPR4 [196-214]	597512	34.64
	ISIEMHGTLEDQLSHLR	1xOxidation [M5]	1	1	2	Q7TPR4	0	1995	665.669			9.407e-07	2.64	[R].ISIEMHGTLEDQLSHLR.[Q]	Q7TPR4 [656-672]	889922	31.88
	MLDAEDIVGTARPDEK		1	1	1	Q7TPR4	0	1759.85	587.286			1.285e-05	1.61	[K].MLDAEDIVGTARPDEK.[A]	Q7TPR4 [221-236]
	MLDAEDIVGTARPDEK	1xOxidation [M1]	1	1	1	Q7TPR4	0	1775.85	888.43			7.917e-11	3.88	[K].MLDAEDIVGTARPDEK.[A]	Q7TPR4 [221-236]	951005	27.93
	QKDYETATLSEIK		1	1	1	Q7TPR4	1	1525.77	509.261			0.03523	2.49	[R].QKDYETATLSEIK.[A]	Q7TPR4 [419-431]	1.28099e+06	24.26
	RDQALTEEHAR		1	1	1	Q7TPR4	1	1325.66	442.556			2.061e-07	3.89	[R].RDQALTEEHAR.[Q]	Q7TPR4 [614-624]	2.76161e+06	9.78
	SIVNYKPK		1	1	2	Q7TPR4	0	948.551	316.854			0.001597	2.09	[K].SIVNYKPK.[I]	Q7TPR4 [677-684]	4.78363e+06	16.85
	VLAVNQENEQLMEDYEK		1	1	1	Q7TPR4	0	2051.96	1026.48			4.566e-07	2.31	[K].VLAVNQENEQLMEDYEK.[L]	Q7TPR4 [265-281]
	VLAVNQENEQLMEDYEK	1xOxidation [M12]	1	1	1	Q7TPR4	0	2067.95	689.989			0.001293	1.61	[K].VLAVNQENEQLMEDYEK.[L]	Q7TPR4 [265-281]	456153	27.5
Q8BFR5	Elongation factor Tu, mitochondrial OS=Mus musculus OX=10090 GN=Tufm PE=1 SV=1	134.64	69	30	61	30	452	49.5	7.56
	Sequence	Modifications	# Protein Groups	# Proteins	# PSMs	Master Protein Accessions	# Missed Cleavages	Theo. MH+ [Da]	m/z [Da] (by Search Engine): Sequest HT			Percolator PEP (by Search Engine): Sequest HT	XCorr (by Search Engine): Sequest HT	Annotated Sequence	Positions in Master Proteins	Abundance: F5: Sample	Top Apex RT [min]
	ADAVQDSEMVELVELEIR	1xOxidation [M9]	1	1	2	Q8BFR5	0	2062	688.008			3.503e-06	3.14	[K].ADAVQDSEMVELVELEIR.[E]	Q8BFR5 [183-200]	984789	39.62
	AEAGDNLGALVR		1	1	2	Q8BFR5	0	1185.62	593.313			1.642e-05	2.82	[R].AEAGDNLGALVR.[G]	Q8BFR5 [316-327]	40026936	27.42
	DKPHVNVGTIGHVDHGK		1	1	3	Q8BFR5	0	1809.94	603.982			6.334e-15	3.76	[R].DKPHVNVGTIGHVDHGK.[T]	Q8BFR5 [54-70]	1.10281e+07	17.34
	DLDKPFLLPVESVYSIPGR		1	1	4	Q8BFR5	0	2145.16	715.725			1.017e-06	2.33	[R].DLDKPFLLPVESVYSIPGR.[G]	Q8BFR5 [253-271]	1.14166e+07	45.11
	DPELGVK		1	1	1	Q8BFR5	0	757.409	379.208			0.01641	2.1	[R].DPELGVK.[S]	Q8BFR5 [228-234]	3.76245e+06	17.76
	EHLLLAK		1	1	1	Q8BFR5	0	823.504	412.255			0.01792	2.79	[R].EHLLLAK.[Q]	Q8BFR5 [163-169]	16487054	19.06
	ELAMPGEDLK	1xOxidation [M4]	1	1	1	Q8BFR5	0	1118.54	559.771			0.00412	1.98	[K].ELAMPGEDLK.[L]	Q8BFR5 [396-405]	5910457	20.87
	ELLTEFGYK		1	1	1	Q8BFR5	0	1099.57	550.285			0.01231	2.26	[R].ELLTEFGYK.[G]	Q8BFR5 [201-209]	1.59807e+06	32.97
	FKKYEEIDNAPEER		1	1	1	Q8BFR5	2	1767.85	589.955			0.003053	2.49	[K].FKKYEEIDNAPEER.[A]	Q8BFR5 [89-102]
	GDECELLGHNK	1xCarbamidomethyl [C4]	1	1	1	Q8BFR5	0	1271.57	636.287			0.0003277	1.15	[K].GDECELLGHNK.[N]	Q8BFR5 [287-297]
	GITINAAHVEYSTAAR		1	1	3	Q8BFR5	0	1673.86	837.433			9.324e-12	4.14	[R].GITINAAHVEYSTAAR.[H]	Q8BFR5 [105-120]	16407013	26.16
	GLVMVKPGSIQPHQK		1	1	3	Q8BFR5	0	1618.91	540.306			3.756e-06	2.79	[R].GLVMVKPGSIQPHQK.[V]	Q8BFR5 [337-351]	5.95813e+06	22.98
	GLVMVKPGSIQPHQK	1xOxidation [M4]	1	1	3	Q8BFR5	0	1634.9	545.639			6.746e-07	2.52	[R].GLVMVKPGSIQPHQK.[V]	Q8BFR5 [337-351]	7.46561e+06	20.66
	GTVVTGTLER		1	1	1	Q8BFR5	0	1032.57	516.788			0.002322	2.48	[R].GTVVTGTLER.[G]	Q8BFR5 [272-281]	33278752	20.5
	HYAHTDCPGHADYVK	1xCarbamidomethyl [C7]	1	1	3	Q8BFR5	0	1770.77	443.445			7.353e-08	3.69	[R].HYAHTDCPGHADYVK.[N]	Q8BFR5 [121-135]	2.49277e+06	13.77
	KGDECELLGHNK	1xCarbamidomethyl [C5]	1	1	1	Q8BFR5	1	1399.66	467.222			2.384e-05	3.51	[K].KGDECELLGHNK.[N]	Q8BFR5 [286-297]	1.66462e+06	15.03
	KYEEIDNAPEER		1	1	2	Q8BFR5	1	1492.69	746.848			3.925e-08	4.19	[K].KYEEIDNAPEER.[A]	Q8BFR5 [91-102]	10620913	17.29
	ILAEGGGAK		1	1	1	Q8BFR5	0	815.462	408.234			0.003915	1.82	[K].ILAEGGGAK.[F]	Q8BFR5 [80-88]	5.67536e+06	12.34
	LLDAVDTYIPVPTR		1	1	3	Q8BFR5	0	1572.86	786.935			5.233e-08	3.33	[K].LLDAVDTYIPVPTR.[D]	Q8BFR5 [239-252]	16415126	39.63
	NMITGTAPLDGCILVVAANDGPMPQTR	1xCarbamidomethyl [C12]; 2xOxidation [M2; M23]	1	1	2	Q8BFR5	0	2844.37	948.793			2.108e-08	3.36	[K].NMITGTAPLDGCILVVAANDGPMPQTR.[E]	Q8BFR5 [136-162]	441759	39.75
	QIGVEHVVVYVNK		1	1	2	Q8BFR5	0	1483.83	742.417			4.241e-08	4.04	[K].QIGVEHVVVYVNK.[A]	Q8BFR5 [170-182]	6.28629e+06	27.47
	QPMILEK	1xOxidation [M3]	1	1	1	Q8BFR5	0	874.47	437.738			0.08783	1.62	[R].QPMILEK.[G]	Q8BFR5 [412-418]	2.10645e+06	18.15
	TIGTGLVTDVPAMTEEDK		1	1	1	Q8BFR5	0	1876.92	938.963			0.006768	1.07	[K].TIGTGLVTDVPAMTEEDK.[N]	Q8BFR5 [430-447]
	TIGTGLVTDVPAMTEEDK	1xOxidation [M13]	1	1	1	Q8BFR5	0	1892.92	946.961			3.321e-07	3.05	[K].TIGTGLVTDVPAMTEEDK.[N]	Q8BFR5 [430-447]	727573	30.29
	TIGTGLVTDVPAMTEEDKNIK		1	1	1	Q8BFR5	1	2232.14	744.719			2.223e-10	3.44	[K].TIGTGLVTDVPAMTEEDKNIK.[W]	Q8BFR5 [430-450]	1.91497e+06	33.63
	TTLTAAITK		1	1	2	Q8BFR5	0	919.546	460.277			0.002988	2.54	[K].TTLTAAITK.[I]	Q8BFR5 [71-79]	3.15139e+07	22.21
	TVVTGIEMFHK		1	1	2	Q8BFR5	0	1261.66	421.224			0.0002159	2.42	[R].TVVTGIEMFHK.[S]	Q8BFR5 [301-311]	15481571	29.36
	TVVTGIEMFHK	1xOxidation [M8]	1	1	2	Q8BFR5	0	1277.66	426.557			1.186e-06	2.82	[R].TVVTGIEMFHK.[S]	Q8BFR5 [301-311]	1.70886e+07	24.95
	VEAQVYILSK		1	1	1	Q8BFR5	0	1149.65	575.329			5.106e-05	2.79	[K].VEAQVYILSK.[E]	Q8BFR5 [352-361]	8038324	28.72
	VEAQVYILSKEEGGR		1	1	2	Q8BFR5	1	1677.88	559.965			1.53e-09	3.97	[K].VEAQVYILSKEEGGR.[H]	Q8BFR5 [352-366]	1.27818e+06	26.89
	VILPPGK		1	1	2	Q8BFR5	0	723.476	362.241			0.06821	1.35	[R].VILPPGK.[E]	Q8BFR5 [389-395]	2.28575e+06	19.89
	VILPPGKELAMPGEDLK		1	1	2	Q8BFR5	1	1807	603.006			0.0001462	1.82	[R].VILPPGKELAMPGEDLK.[L]	Q8BFR5 [389-405]	309197	33.58
	VILPPGKELAMPGEDLK	1xOxidation [M11]	1	1	2	Q8BFR5	1	1823	608.339			0.005856	1.65	[R].VILPPGKELAMPGEDLK.[L]	Q8BFR5 [389-405]	862032	29.77
	YEEIDNAPEER		1	1	1	Q8BFR5	0	1364.6	682.801			6.045e-06	3.14	[K].YEEIDNAPEER.[A]	Q8BFR5 [92-102]	9934755	19.14
P01868	Ig gamma-1 chain C region secreted form OS=Mus musculus OX=10090 GN=Ighg1 PE=1 SV=1	131.96	53	14	79	14	324	35.7	7.4
	Sequence	Modifications	# Protein Groups	# Proteins	# PSMs	Master Protein Accessions	# Missed Cleavages	Theo. MH+ [Da]	m/z [Da] (by Search Engine): Sequest HT			Percolator PEP (by Search Engine): Sequest HT	XCorr (by Search Engine): Sequest HT	Annotated Sequence	Positions in Master Proteins	Abundance: F5: Sample	Top Apex RT [min]
	APQVYTIPPPK		1	2	8	P01868	0	1210.68	605.844			7.42e-06	3.16	[K].APQVYTIPPPK.[E]	P01868 [222-232]	9.45228e+07	25.55
	APQVYTIPPPKEQMAK		1	2	3	P01868	1	1797.96	599.99			0.000464	2.34	[K].APQVYTIPPPKEQMAK.[D]	P01868 [222-237]	1.78255e+06	25.11
	APQVYTIPPPKEQMAK	1xOxidation [M14]	1	2	13	P01868	1	1813.95	605.323			1.083e-08	3.86	[K].APQVYTIPPPKEQMAK.[D]	P01868 [222-237]	1.11491e+08	22.57
	DVLTITLTPK		1	2	14	P01868	0	1100.66	550.831			0.0007137	2.38	[K].DVLTITLTPK.[V]	P01868 [126-135]	2.32441e+08	35.43
	EEQFNSTFR		1	2	1	P01868	0	1157.52	579.261			0.01518	2.23	[R].EEQFNSTFR.[S]	P01868 [170-178]	3574677	22.34
	SLSHSPGK		1	1	1	P01868	0	812.426	406.716			0.07144	1.17	[K].SLSHSPGK.[-]	P01868 [317-324]
	SNWEAGNTFTCSVLHEGLHNHHTEK	1xCarbamidomethyl [C11]	1	2	1	P01868	0	2905.31	969.106			0.001881	1.01	[K].SNWEAGNTFTCSVLHEGLHNHHTEK.[S]	P01868 [292-316]
	SVSELPIMHQDWLNGK	1xOxidation [M8]	1	2	2	P01868	0	1869.92	935.462			1.549e-07	3.02	[R].SVSELPIMHQDWLNGK.[E]	P01868 [179-194]	6.75083e+06	32.6
	SVSELPIMHQDWLNGKEFK	1xOxidation [M8]	1	2	1	P01868	1	2274.12	758.709			0.0003863	2.06	[R].SVSELPIMHQDWLNGKEFK.[C]	P01868 [179-197]	2.63228e+06	33.65
	TTPPSVYPLAPGSAAQTNSMVTLGCLVK	1xCarbamidomethyl [C25]	1	2	1	P01868	0	2860.46	954.158			0.01851	1.19	[K].TTPPSVYPLAPGSAAQTNSMVTLGCLVK.[G]	P01868 [3-30]	256650	43.54
	TTPPSVYPLAPGSAAQTNSMVTLGCLVK	1xCarbamidomethyl [C25]; 1xOxidation [M20]	1	2	6	P01868	0	2876.45	959.489			3.934e-10	5.23	[K].TTPPSVYPLAPGSAAQTNSMVTLGCLVK.[G]	P01868 [3-30]	2.00748e+07	40.22
	VDKKIVPR		1	2	1	P01868	2	954.609	318.874			0.04831	1.78	[K].VDKKIVPR.[D]	P01868 [93-100]	468401	11.41
	VNSAAFPAPIEK		1	2	21	P01868	0	1243.67	622.337			4.537e-05	2.45	[R].VNSAAFPAPIEK.[T]	P01868 [200-211]	6.01935e+08	27.11
	VNSAAFPAPIEKTISK		1	2	3	P01868	1	1672.93	558.314			1.259e-06	3.35	[R].VNSAAFPAPIEKTISK.[T]	P01868 [200-215]
	VTCVVVDISK	1xCarbamidomethyl [C3]	1	2	1	P01868	0	1119.61	560.307			0.0002692	2.85	[K].VTCVVVDISK.[D]	P01868 [136-145]	1.56714e+06	26.26
	VTCVVVDISKDDPEVQFSWFVDDVEVHTAQTQPR	1xCarbamidomethyl [C3]	1	2	2	P01868	1	3945.9	987.228			3.353e-14	6.52	[K].VTCVVVDISKDDPEVQFSWFVDDVEVHTAQTQPR.[E]	P01868 [136-169]	1.17014e+06	47.57
P16460	Argininosuccinate synthase OS=Mus musculus OX=10090 GN=Ass1 PE=1 SV=1	120.27	56	28	59	28	412	46.6	8.22
	Sequence	Modifications	# Protein Groups	# Proteins	# PSMs	Master Protein Accessions	# Missed Cleavages	Theo. MH+ [Da]	m/z [Da] (by Search Engine): Sequest HT			Percolator PEP (by Search Engine): Sequest HT	XCorr (by Search Engine): Sequest HT	Annotated Sequence	Positions in Master Proteins	Abundance: F5: Sample	Top Apex RT [min]
	APNSPDVLEIEFK		1	1	1	P16460	0	1458.75	729.879			1.914e-08	4.1	[K].APNSPDVLEIEFK.[K]	P16460 [216-228]	9006130	36.37
	APNSPDVLEIEFKK		1	1	4	P16460	1	1586.84	529.617			1.706e-08	4.29	[K].APNSPDVLEIEFKK.[G]	P16460 [216-229]	2.91084e+07	31.51
	EDFEEAR		1	1	1	P16460	0	895.379	448.192			0.04588	1.6	[K].EDFEEAR.[K]	P16460 [42-48]	2154747	15.29
	ESPLSLYNEELVSMNVQGDYEPIDATGFININSLR		1	1	1	P16460	0	3927.9	1309.97			1.573e-05	3.08	[R].ESPLSLYNEELVSMNVQGDYEPIDATGFININSLR.[L]	P16460 [364-398]
	FELTCYSLAPQIK	1xCarbamidomethyl [C5]	1	1	1	P16460	0	1569.8	785.408			3.344e-05	2.94	[R].FELTCYSLAPQIK.[V]	P16460 [128-140]	11396107	37.73
	GNDQVRFELTCYSLAPQIK	1xCarbamidomethyl [C11]	1	1	1	P16460	1	2239.12	747.047			1.018e-06	3.13	[K].GNDQVRFELTCYSLAPQIK.[V]	P16460 [122-140]	1.01963e+06	37.04
	GQVYILGR		1	1	2	P16460	0	905.52	453.263			0.05819	1.97	[K].GQVYILGR.[E]	P16460 [356-363]	72300368	25.82
	GRNDLMEYAK		1	1	2	P16460	1	1196.57	598.791			3.526e-05	2.6	[K].GRNDLMEYAK.[Q]	P16460 [156-165]	1.28586e+07	21.31
	GRNDLMEYAK	1xOxidation [M6]	1	1	2	P16460	1	1212.57	606.787			0.000119	3.03	[K].GRNDLMEYAK.[Q]	P16460 [156-165]	10636932	16.3
	GVPVKVTNIK		1	1	2	P16460	1	1054.66	527.834			0.002602	1.9	[K].GVPVKVTNIK.[D]	P16460 [230-239]	2.00961e+06	20.17
	HGVGRIDIVENR		1	1	1	P16460	1	1364.74	455.583			0.01362	1.57	[K].HGVGRIDIVENR.[F]	P16460 [261-272]
	KVFIEDVSK		1	1	2	P16460	1	1064.6	532.803			2.622e-05	3.26	[K].KVFIEDVSK.[E]	P16460 [58-66]	1.26856e+07	21.13
	IDIVENR		1	1	3	P16460	0	858.468	429.737			0.04409	1.66	[R].IDIVENR.[F]	P16460 [266-272]	9.36536e+07	19.78
	IKQGLGLK		1	1	1	P16460	1	856.561	428.784			0.005304	1.73	[K].IKQGLGLK.[F]	P16460 [309-316]	8432443	16.11
	MPEFYNR		1	1	1	P16460	0	956.429	478.719			0.04269	2.19	[R].MPEFYNR.[F]	P16460 [147-153]	41171536	24.06
	MPEFYNR	1xOxidation [M1]	1	1	3	P16460	0	972.424	486.716			0.05231	1.76	[R].MPEFYNR.[F]	P16460 [147-153]	17308568	19.26
	NDLMEYAK		1	1	1	P16460	0	983.45	492.229			0.003727	2.84	[R].NDLMEYAK.[Q]	P16460 [158-165]	15211616	23.99
	NDLMEYAK	1xOxidation [M4]	1	1	2	P16460	0	999.445	500.225			0.009598	2.55	[R].NDLMEYAK.[Q]	P16460 [158-165]	1.28997e+07	18.3
	NQAPPGLYTK		1	1	3	P16460	0	1088.57	544.79			0.0008336	2.06	[K].NQAPPGLYTK.[T]	P16460 [200-209]	46616652	19.45
	QHGIPIPVTPK		1	1	4	P16460	0	1186.69	593.85			0.0003196	2.39	[K].QHGIPIPVTPK.[S]	P16460 [166-176]	36537556	25.46
	QVEIAQR		1	1	1	P16460	0	843.468	422.237			0.0758	2.36	[R].QVEIAQR.[E]	P16460 [102-108]	6.63911e+06	14.21
	RQVEIAQR		1	1	2	P16460	1	999.569	500.288			0.0004557	2.31	[R].RQVEIAQR.[E]	P16460 [101-108]	2.07256e+07	11.98
	SPWSMDENLMHISYEAGILENPK	2xOxidation [M5; M10]	1	1	1	P16460	0	2693.22	898.406			1.885e-05	1.89	[K].SPWSMDENLMHISYEAGILENPK.[N]	P16460 [177-199]	672621	37.58
	TQDPAKAPNSPDVLEIEFK		1	1	2	P16460	1	2099.07	700.362			1.945e-10	5.06	[K].TQDPAKAPNSPDVLEIEFK.[K]	P16460 [210-228]	5.67167e+06	33.86
	TQDPAKAPNSPDVLEIEFKK		1	1	3	P16460	2	2227.16	743.057			3.535e-17	6.36	[K].TQDPAKAPNSPDVLEIEFKK.[G]	P16460 [210-229]	31673369	30.05
	VFIEDVSK		1	1	1	P16460	0	936.504	468.755			0.0143	1.91	[K].VFIEDVSK.[E]	P16460 [59-66]	12355344	24.57
	VQVSVFK		1	1	1	P16460	0	806.477	403.742			0.06198	1.74	[K].VQVSVFK.[G]	P16460 [349-355]	69801304	24.19
	VQVSVFKGQVYILGR		1	1	1	P16460	1	1692.98	564.998			8.985e-07	3.05	[K].VQVSVFKGQVYILGR.[E]	P16460 [349-363]	1.02302e+06	35.63
	VTNIKDGTTR		1	1	3	P16460	1	1104.6	368.871			0.0001169	1.8	[K].VTNIKDGTTR.[T]	P16460 [235-244]	5.29351e+06	9.73
	YLLGTSLARPCIAR	1xCarbamidomethyl [C11]	1	1	3	P16460	0	1590.88	530.964			0.004713	2.16	[R].YLLGTSLARPCIAR.[R]	P16460 [87-100]	7.39961e+06	31.32
	YVSHGATGK		1	1	3	P16460	0	919.463	460.234			0.000584	2.28	[K].YVSHGATGK.[G]	P16460 [113-121]	7213622	4.89
Q61879	Myosin-10 OS=Mus musculus OX=10090 GN=Myh10 PE=1 SV=2	120.26	22	43	65	20	1976	228.9	5.54
	Sequence	Modifications	# Protein Groups	# Proteins	# PSMs	Master Protein Accessions	# Missed Cleavages	Theo. MH+ [Da]	m/z [Da] (by Search Engine): Sequest HT			Percolator PEP (by Search Engine): Sequest HT	XCorr (by Search Engine): Sequest HT	Annotated Sequence	Positions in Master Proteins	Abundance: F5: Sample	Top Apex RT [min]
	ALELDPNLYR		1	2	1	Q61879	0	1203.64	602.321			0.005966	1.49	[KR].ALELDPNLYR.[I]	Q61879 [753-762]	1.13387e+06	33
	ALEQQVEEMR		1	1	1	Q61879	0	1232.59	616.8			0.00443	1.15	[R].ALEQQVEEMR.[T]	Q61879 [1536-1545]	387089	24.15
	ASRDEIFAQSK		1	1	2	Q61879	1	1251.63	417.882			0.001338	1.71	[R].ASRDEIFAQSK.[E]	Q61879 [1666-1676]
	DAAGLESQLQDTQELLQEETR		1	1	1	Q61879	0	2374.14	792.049			0.0003359	1.6	[K].DAAGLESQLQDTQELLQEETR.[Q]	Q61879 [1309-1329]	255569	42.74
	ELDDATEANEGLSR		1	1	1	Q61879	0	1519.69	760.346			4.963e-07	3.31	[R].ELDDATEANEGLSR.[E]	Q61879 [1906-1919]	1.0992e+06	21.35
	ELEAELEDER		1	1	1	Q61879	0	1232.56	616.784			0.02338	1.39	[R].ELEAELEDER.[K]	Q61879 [1600-1609]	315605	23.73
	ELEAELEDERK		1	1	1	Q61879	1	1360.66	454.223			0.0003179	1.24	[R].ELEAELEDERK.[Q]	Q61879 [1600-1610]
	EQADFAVEALAK		1	1	1	Q61879	0	1291.65	646.324			0.0002419	2.18	[K].EQADFAVEALAK.[A]	Q61879 [415-426]
	GGPISFSSSR		1	1	1	Q61879	0	994.495	497.749			0.02415	1.91	[R].GGPISFSSSR.[S]	Q61879 [1931-1940]	1.03186e+06	22.3
	IGQLEEQLEQEAK		1	1	1	Q61879	0	1514.77	757.887			1.146e-06	2.52	[K].IGQLEEQLEQEAK.[E]	Q61879 [1823-1835]	1.80526e+06	29.02
	IGQLEEQLEQEAKER		1	1	1	Q61879	1	1799.91	600.642			0.003094	1.23	[K].IGQLEEQLEQEAKER.[A]	Q61879 [1823-1837]
	LQQELDDLTVDLDHQR		1	1	1	Q61879	0	1937.96	646.656			4.35e-05	2.02	[R].LQQELDDLTVDLDHQR.[Q]	Q61879 [1425-1440]
	IVFQEFR		1	2	1	Q61879	0	938.509	469.758			0.0437	1.62	[R].IVFQEFR.[Q]	Q61879 [719-725]	1.57723e+06	29.76
	NMDPLNDNVATLLHQSSDR	1xOxidation [M2]	1	1	1	Q61879	0	2156	719.338			0.05676	0.91	[K].NMDPLNDNVATLLHQSSDR.[F]	Q61879 [595-613]
	QLEEAEEEATR		1	1	1	Q61879	0	1304.6	652.801			0.001029	1.54	[R].QLEEAEEEATR.[A]	Q61879 [1885-1895]
	QLLQANPILESFGNAK		1	1	2	Q61879	0	1742.94	871.975			1.536e-06	2.42	[R].QLLQANPILESFGNAK.[T]	Q61879 [217-232]	314346	40.9
	SDLLLEGFNNYR		1	1	1	Q61879	0	1440.71	720.862			0.06382	1.32	[K].SDLLLEGFNNYR.[F]	Q61879 [297-308]
	TGLEDPER		1	1	1	Q61879	0	916.437	458.721			0.005772	1.84	[R].TGLEDPER.[Y]	Q61879 [5-12]	535854	15.81
	TTLQVDTLNTELAAER		1	1	1	Q61879	0	1774.92	887.965			1.028e-08	3.57	[K].TTLQVDTLNTELAAER.[S]	Q61879 [1762-1777]	545092	33.17
	VLAYDKLEK		1	1	2	Q61879	1	1078.61	360.208			0.001369	1.96	[K].VLAYDKLEK.[T]	Q61879 [1412-1420]	596751	20.99
	VKPLLQVTR		2	3	2	Q6URW6; Q61879	0	1053.68	351.897			0.002787	2.05	[K].VKPLLQVTR.[Q]	Q6URW6 [862-870]; Q61879 [841-849]	1.33146e+06	22.36
	YEILTPNAIPK		2	2	1	Q6URW6; Q61879	0	1258.7	629.855			0.02079	1.74	[R].YEILTPNAIPK.[G]	Q6URW6 [749-759]; Q61879 [728-738]	479217	32.57
	ADFCIIHYAGK	1xCarbamidomethyl [C4]	2	2	2	Q8VDD5; Q61879	0	1294.62	647.817			2.107e-06	3.15	[K].ADFCIIHYAGK.[V]	Q8VDD5 [566-576]; Q61879 [573-583]	7.83246e+06	29.26
	AGKLDPHLVLDQLR		2	2	3	Q8VDD5; Q61879	1	1574.9	787.955			8.876e-09	2.97	[KR].AGKLDPHLVLDQLR.[C]	Q8VDD5 [680-693]; Q61879 [687-700]	7591423	32.93
	AGVLAHLEEER		2	2	2	Q8VDD5; Q61879	0	1223.64	408.549			2.342e-06	2.91	[R].AGVLAHLEEER.[D]	Q8VDD5 [765-775]; Q61879 [772-782]	18073725	24.55
	AGVLAHLEEERDLK		2	2	3	Q8VDD5; Q61879	1	1579.84	527.284			1.256e-10	4.54	[R].AGVLAHLEEERDLK.[I]	Q8VDD5 [765-778]; Q61879 [772-785]	15804991	26.05
	CIIPNHEK	1xCarbamidomethyl [C1]	2	3	1	Q8VDD5; Q61879	0	1010.51	337.507			0.006252	1.85	[R].CIIPNHEK.[RK]	Q8VDD5 [671-678]; Q61879 [678-685]	534370	15.77
	DKADFCIIHYAGK	1xCarbamidomethyl [C6]	2	2	1	Q8VDD5; Q61879	1	1537.75	513.253			4.129e-10	3.87	[K].DKADFCIIHYAGK.[V]	Q8VDD5 [564-576]; Q61879 [571-583]	2177022	27.46
	DRAEAEAR		2	3	1	Q8VDD5; Q61879	1	917.444	459.224			0.01693	1.75	[R].DRAEAEAR.[E]	Q8VDD5 [1465-1472]; Q61879 [1472-1479]	954623	4.5
	KVIQYLAHVASSHK		2	2	2	Q8VDD5; Q61879	1	1580.89	527.634			1.814e-13	6.16	[K].KVIQYLAHVASSHK.[SG]	Q8VDD5 [186-199]; Q61879 [190-203]	7.81264e+06	23.52
	LDPHLVLDQLR		2	2	4	Q8VDD5; Q61879	0	1318.75	659.878			8.434e-06	2.17	[K].LDPHLVLDQLR.[C]	Q8VDD5 [683-693]; Q61879 [690-700]	22969179	35.65
	LQQLFNHTMFILEQEEYQR	1xOxidation [M9]	2	3	1	Q8VDD5; Q61879	0	2483.2	828.406			4.368e-07	1.92	[K].LQQLFNHTMFILEQEEYQR.[E]	Q8VDD5 [476-494]; Q61879 [483-501]	1.70608e+06	36.84
	NTNPNFVR		2	2	3	Q8VDD5; Q61879	0	961.485	481.245			0.02044	1.49	[R].NTNPNFVR.[C]	Q8VDD5 [663-670]; Q61879 [670-677]	30591544	17.26
	TQLEELEDELQATEDAK		2	2	2	Q8VDD5; Q61879	0	1961.92	981.464			8.059e-11	4.03	[KR].TQLEELEDELQATEDAK.[L]	Q8VDD5 [1539-1555]; Q61879 [1546-1562]	2.80341e+06	39.05
	VDYKADEWLMK	1xOxidation [M10]	2	2	1	Q8VDD5; Q61879	1	1413.67	471.895			0.009082	1.28	[K].VDYKADEWLMK.[N]	Q8VDD5 [577-587]; Q61879 [584-594]	873282	27.07
	VEEEEER		2	2	1	Q8VDD5; Q61879	0	919.4	460.203			0.04527	1.13	[R].VEEEEER.[CN]	Q8VDD5 [924-930]; Q61879 [931-937]	262127	6.6
	VIQYLAHVASSHK		2	2	6	Q8VDD5; Q61879	0	1452.8	726.901			9.821e-09	4.14	[K].VIQYLAHVASSHK.[SG]	Q8VDD5 [187-199]; Q61879 [191-203]	57453781	22.73
	YAEERDRAEAEAR		2	2	1	Q8VDD5; Q61879	2	1565.73	783.368			0.01519	0.94	[KR].YAEERDRAEAEAR.[E]	Q8VDD5 [1460-1472]; Q61879 [1467-1479]	1.11597e+06	12.3
	CNGVLEGIR	1xCarbamidomethyl [C1]	3	11	1	Q8VDD5; Q6URW6; Q61879	0	1017.51	509.261			0.001598	2.46	[R].CNGVLEGIR.[I]	Q8VDD5 [694-702]; Q6URW6 [722-730]; Q61879 [701-709]	477359	24
	EDQSILCTGESGAGK	1xCarbamidomethyl [C7]	3	4	1	Q8VDD5; Q6URW6; Q61879	0	1551.7	776.351			5.49e-07	3.25	[R].EDQSILCTGESGAGK.[T]	Q8VDD5 [166-180]; Q6URW6 [186-200]; Q61879 [170-184]	1.00848e+06	22.08
	FDQLLAEEK		3	4	1	Q8VDD5; Q6URW6; Q61879	0	1092.56	546.782			0.0004417	2.69	[K].FDQLLAEEK.[NTAG]	Q8VDD5 [1446-1454]; Q6URW6 [1474-1482]; Q61879 [1453-1461]	14959791	25.41
	KFDQLLAEEK		3	4	1	Q8VDD5; Q6URW6; Q61879	1	1220.65	610.828			2.135e-07	3.61	[KR].KFDQLLAEEK.[NTAG]	Q8VDD5 [1445-1454]; Q6URW6 [1473-1482]; Q61879 [1452-1461]	33216896	24.33
	QKLQLEK		3	4	1	Q8VDD5; Q6URW6; Q61879	1	886.536	443.771			0.06856	1.54	[R].QKLQLEK.[V]	Q8VDD5 [960-966]; Q6URW6 [988-994]; Q61879 [967-973]	1.08437e+06	13.91
Q9JMH9	Unconventional myosin-XVIIIa OS=Mus musculus OX=10090 GN=Myo18a PE=1 SV=2	115.48	26	51	69	51	2050	232.6	6.28
	Sequence	Modifications	# Protein Groups	# Proteins	# PSMs	Master Protein Accessions	# Missed Cleavages	Theo. MH+ [Da]	m/z [Da] (by Search Engine): Sequest HT			Percolator PEP (by Search Engine): Sequest HT	XCorr (by Search Engine): Sequest HT	Annotated Sequence	Positions in Master Proteins	Abundance: F5: Sample	Top Apex RT [min]
	AVEELLESLDLEK		1	1	1	Q9JMH9	0	1487.78	744.394			1.629e-06	2.63	[R].AVEELLESLDLEK.[S]	Q9JMH9 [1144-1156]	313644	42.89
	DGFSLASQLK		1	1	1	Q9JMH9	0	1065.56	533.282			0.001324	1.99	[R].DGFSLASQLK.[S]	Q9JMH9 [358-367]	2.23033e+06	31.96
	DGFSLASQLKSEELSLPEGK		1	1	1	Q9JMH9	1	2135.09	712.363			0.02082	1.61	[R].DGFSLASQLKSEELSLPEGK.[A]	Q9JMH9 [358-377]	333725	38.79
	DLALGLVPGDR		1	1	3	Q9JMH9	0	1125.63	563.315			0.0007498	2.9	[K].DLALGLVPGDR.[L]	Q9JMH9 [265-275]	4364775	35.34
	DTKEEMSELAR		1	1	1	Q9JMH9	1	1308.61	654.809			0.0197	1.76	[R].DTKEEMSELAR.[K]	Q9JMH9 [1878-1888]	371840	21.21
	ELQTQYDALKK		1	1	2	Q9JMH9	1	1336.71	668.858			0.0007107	1.79	[K].ELQTQYDALKK.[Q]	Q9JMH9 [1324-1334]	1.10297e+06	20.09
	EMESRDEEVEEAR		1	1	1	Q9JMH9	1	1608.68	536.897			0.02718	1.52	[K].EMESRDEEVEEAR.[Q]	Q9JMH9 [1585-1597]
	EMESRDEEVEEAR	1xOxidation [M2]	1	1	1	Q9JMH9	1	1624.68	542.229			0.00345	1.5	[K].EMESRDEEVEEAR.[Q]	Q9JMH9 [1585-1597]	228485	13.16
	GASFEELCHNYAQDR	1xCarbamidomethyl [C8]	1	1	2	Q9JMH9	0	1796.77	599.592			0.05217	1.01	[R].GASFEELCHNYAQDR.[L]	Q9JMH9 [802-816]
	KIQDLAIR		1	1	1	Q9JMH9	1	956.589	478.799			0.06276	1.93	[R].KIQDLAIR.[C]	Q9JMH9 [1208-1215]	754626	20.93
	LEISNPIPIK		1	1	1	Q9JMH9	0	1123.67	562.34			0.02587	1.09	[R].LEISNPIPIK.[V]	Q9JMH9 [60-69]	405235	33.48
	LENLASR		1	1	1	Q9JMH9	0	802.442	401.724			0.03562	1.53	[R].LENLASR.[L]	Q9JMH9 [1837-1843]
	LFSYYGPQEGDK		1	1	1	Q9JMH9	0	1403.65	702.327			1.484e-05	2.35	[R].LFSYYGPQEGDK.[K]	Q9JMH9 [897-908]
	LFSYYGPQEGDKK		1	1	1	Q9JMH9	1	1531.74	511.251			0.02559	1.15	[R].LFSYYGPQEGDKK.[G]	Q9JMH9 [897-909]	5623096	24.34
	LGDLQADSDESQR		1	1	1	Q9JMH9	0	1433.65	717.325			2.301e-07	2.68	[R].LGDLQADSDESQR.[A]	Q9JMH9 [1407-1419]	784027	18.6
	LHLEGQQVR		1	1	1	Q9JMH9	0	1079.6	540.301			0.0401	1.59	[K].LHLEGQQVR.[N]	Q9JMH9 [1440-1448]
	LKVQPIPELSELSR		1	1	2	Q9JMH9	1	1608.93	804.965			0.0009142	1.73	[R].LKVQPIPELSELSR.[S]	Q9JMH9 [305-318]	1.1903e+06	34.97
	IISNLFLGR		1	1	1	Q9JMH9	0	1032.62	516.813			0.0006296	2.08	[K].IISNLFLGR.[A]	Q9JMH9 [965-973]	2.90063e+06	35.48
	LPALVPPPPPALR		1	1	3	Q9JMH9	0	1337.83	669.418			4.062e-05	2.49	[R].LPALVPPPPPALR.[E]	Q9JMH9 [207-219]	3.48823e+06	37.94
	LQQELEDKMEVEQQSR	1xOxidation [M9]	1	1	1	Q9JMH9	1	2005.95	669.322			0.04625	1.36	[R].LQQELEDKMEVEQQSR.[R]	Q9JMH9 [1385-1400]	572327	18.51
	ISELTSELTDER		1	1	1	Q9JMH9	0	1392.69	696.844			9.746e-06	3.03	[R].ISELTSELTDER.[N]	Q9JMH9 [1287-1298]	913438	27.9
	LSTLSDQVNQR		1	1	1	Q9JMH9	0	1260.65	630.83			4.788e-05	2.77	[K].LSTLSDQVNQR.[D]	Q9JMH9 [1632-1642]	2.31548e+06	20.07
	LTAELQDTK		1	1	1	Q9JMH9	0	1018.54	509.774			0.007591	1.38	[R].LTAELQDTK.[L]	Q9JMH9 [1431-1439]	1.40303e+06	18.37
	NKDEEIQQLR		1	1	1	Q9JMH9	1	1272.65	636.828			0.003149	1.9	[R].NKDEEIQQLR.[S]	Q9JMH9 [1254-1263]
	NQLEESEFTCAAAVK	1xCarbamidomethyl [C10]	1	1	1	Q9JMH9	0	1696.78	848.894			1.825e-06	3.02	[K].NQLEESEFTCAAAVK.[A]	Q9JMH9 [1686-1700]
	NTGESASQLLDAETAER		1	1	1	Q9JMH9	0	1791.84	896.419			1.411e-07	2.63	[R].NTGESASQLLDAETAER.[L]	Q9JMH9 [1299-1315]
	NYIVVDEKR		1	1	1	Q9JMH9	1	1135.61	568.309			0.02553	2.17	[R].NYIVVDEKR.[A]	Q9JMH9 [1135-1143]
	QDQSIVLLGSSGSGK		1	1	1	Q9JMH9	0	1475.77	738.388			3.874e-07	3.15	[R].QDQSIVLLGSSGSGK.[T]	Q9JMH9 [490-504]
	QGPEESGLGEGTK		1	1	1	Q9JMH9	0	1288.6	644.803			0.0001161	1.97	[R].QGPEESGLGEGTK.[L]	Q9JMH9 [731-743]
	REDMAPHIYAVAQTAYR	1xOxidation [M4]	1	1	1	Q9JMH9	1	2007.97	669.993			2.971e-06	2.77	[R].REDMAPHIYAVAQTAYR.[A]	Q9JMH9 [467-483]	661909	25.11
	RFDSELSQAHEETQR		1	1	1	Q9JMH9	1	1832.85	611.622			1.355e-09	3.93	[R].RFDSELSQAHEETQR.[E]	Q9JMH9 [1458-1472]
	RFDSELSQAHEETQREK		1	1	1	Q9JMH9	2	2089.99	523.252			1.898e-06	3.21	[R].RFDSELSQAHEETQREK.[L]	Q9JMH9 [1458-1474]	721461	18.26
	RFDVLAPHLTK		1	1	1	Q9JMH9	1	1296.74	432.919			0.001251	2.78	[R].RFDVLAPHLTK.[K]	Q9JMH9 [1120-1130]	1.05902e+06	26.85
	RLENLASR		1	1	1	Q9JMH9	1	958.543	479.774			0.04274	2.48	[K].RLENLASR.[L]	Q9JMH9 [1836-1843]	1.745e+06	14.7
	RLGDLQADSDESQR		1	1	2	Q9JMH9	1	1589.75	530.588			0.0006591	2.51	[R].RLGDLQADSDESQR.[A]	Q9JMH9 [1406-1419]	597313	18.39
	RPTGDFGFSLR		1	1	2	Q9JMH9	0	1252.64	626.826			0.001687	2.55	[R].RPTGDFGFSLR.[R]	Q9JMH9 [226-236]	2.59238e+06	28.93
	RPTGDFGFSLRR		1	1	1	Q9JMH9	1	1408.74	470.255			0.03765	1.43	[R].RPTGDFGFSLRR.[T]	Q9JMH9 [226-237]	453520	25.28
	RVVHFAEPGAGTK		1	1	1	Q9JMH9	1	1368.74	456.916			0.0002453	2.07	[R].RVVHFAEPGAGTK.[D]	Q9JMH9 [252-264]	1.35841e+06	17.45
	SEELSLPEGK		1	1	1	Q9JMH9	0	1088.55	544.778			0.002765	2.14	[K].SEELSLPEGK.[A]	Q9JMH9 [368-377]	2.15398e+06	24.03
	SLAHADEAR		1	1	1	Q9JMH9	0	969.475	485.241			0.0007135	1.39	[R].SLAHADEAR.[G]	Q9JMH9 [865-873]	368647	8.62
	SRDEIVEMIR		1	1	1	Q9JMH9	1	1247.64	416.552			0.06685	2.01	[K].SRDEIVEMIR.[Q]	Q9JMH9 [288-297]	586590	26.94
	SRDEIVEMIR	1xOxidation [M8]	1	1	1	Q9JMH9	1	1263.64	421.883			0.02395	1.95	[K].SRDEIVEMIR.[Q]	Q9JMH9 [288-297]	592340	21.12
	SRVPELVTK		1	1	2	Q9JMH9	1	1028.61	514.808			0.003414	2.28	[R].SRVPELVTK.[R]	Q9JMH9 [191-199]	2.84185e+06	19.3
	TALEEQLSR		1	1	1	Q9JMH9	0	1046.55	523.777			0.001813	2.65	[K].TALEEQLSR.[L]	Q9JMH9 [1724-1732]	2.70368e+06	21.24
	TFLQELER		1	1	1	Q9JMH9	0	1035.55	518.276			0.006033	2	[R].TFLQELER.[Y]	Q9JMH9 [825-832]	3.37484e+06	32.93
	TLEGQLMQHPGLGIPRPGPR	1xOxidation [M7]	1	1	1	Q9JMH9	0	2170.15	543.294			0.001037	2.45	[R].TLEGQLMQHPGLGIPRPGPR.[S]	Q9JMH9 [171-190]	623429	28.97
	TRLEISNPIPIK		1	1	2	Q9JMH9	1	1380.82	460.944			0.002884	2.24	[K].TRLEISNPIPIK.[V]	Q9JMH9 [58-69]	699170	30.71
	VKDQEEELDEQAGSIQMLEQAK		1	1	1	Q9JMH9	1	2518.2	840.07			0.001894	1.04	[K].VKDQEEELDEQAGSIQMLEQAK.[L]	Q9JMH9 [1547-1568]
	VKDQEEELDEQAGSIQMLEQAK	1xOxidation [M17]	1	1	2	Q9JMH9	1	2534.19	845.404			4.204e-06	2.21	[K].VKDQEEELDEQAGSIQMLEQAK.[L]	Q9JMH9 [1547-1568]	555664	29.77
	VLAISPEEQK		1	1	1	Q9JMH9	0	1113.62	557.31			0.0005167	2.24	[K].VLAISPEEQK.[T]	Q9JMH9 [651-660]	2.84418e+06	22.36
	VQPIPELSELSR		1	1	1	Q9JMH9	0	1367.75	684.379			0.001049	1.8	[K].VQPIPELSELSR.[S]	Q9JMH9 [307-318]	1.96133e+06	35.1
	VVHFAEPGAGTK		1	1	2	Q9JMH9	0	1212.64	606.822			0.0003287	1.44	[R].VVHFAEPGAGTK.[D]	Q9JMH9 [253-264]	3.25132e+06	19.23
	VVSLEAELQDISSQESKDEASLAK		1	1	1	Q9JMH9	1	2576.29	859.435			2.03e-08	2.45	[K].VVSLEAELQDISSQESKDEASLAK.[V]	Q9JMH9 [1512-1535]	452029	40.53
	YGASLLHTYAGPSLLVLSTR		1	1	3	Q9JMH9	0	2119.15	707.057			1.354e-10	4.58	[R].YGASLLHTYAGPSLLVLSTR.[G]	Q9JMH9 [429-448]	1.1579e+06	41.38
Q9DBM2	Peroxisomal bifunctional enzyme OS=Mus musculus OX=10090 GN=Ehhadh PE=1 SV=4	110.22	46	29	55	29	718	78.3	9.13
	Sequence	Modifications	# Protein Groups	# Proteins	# PSMs	Master Protein Accessions	# Missed Cleavages	Theo. MH+ [Da]	m/z [Da] (by Search Engine): Sequest HT			Percolator PEP (by Search Engine): Sequest HT	XCorr (by Search Engine): Sequest HT	Annotated Sequence	Positions in Master Proteins	Abundance: F5: Sample	Top Apex RT [min]
	ALQYAFFAEK		1	1	1	Q9DBM2	0	1187.61	594.31			0.006756	2.55	[R].ALQYAFFAEK.[S]	Q9DBM2 [265-274]	7.47626e+06	34.41
	FAQTVIGKPIEPR		1	1	2	Q9DBM2	0	1455.83	485.948			2.881e-09	3.53	[K].FAQTVIGKPIEPR.[R]	Q9DBM2 [182-194]	3.7788e+06	25.53
	GQGLTGPSLPPGTPTR		1	1	1	Q9DBM2	0	1535.82	768.413			0.0001336	2.2	[K].GQGLTGPSLPPGTPTR.[K]	Q9DBM2 [531-546]	680353	26.93
	HISTDEALK		1	1	1	Q9DBM2	0	1013.53	507.267			2.57e-05	2.46	[R].HISTDEALK.[L]	Q9DBM2 [155-163]	2.39992e+06	14.81
	HPYEVAIK		1	1	1	Q9DBM2	0	956.52	478.762			0.01877	1.47	[K].HPYEVAIK.[E]	Q9DBM2 [241-248]
	HPYEVAIKEEAK		1	1	2	Q9DBM2	1	1413.74	471.917			1.425e-12	4.18	[K].HPYEVAIKEEAK.[L]	Q9DBM2 [241-252]	4.00673e+06	18
	HVGGPMYYAASVGLPTVLEK		1	1	1	Q9DBM2	0	2089.08	697.029			0.0004332	1.54	[R].HVGGPMYYAASVGLPTVLEK.[L]	Q9DBM2 [654-673]	564868	39.98
	HVGGPMYYAASVGLPTVLEK	1xOxidation [M6]	1	1	1	Q9DBM2	0	2105.07	702.358			4.87e-09	3.91	[R].HVGGPMYYAASVGLPTVLEK.[L]	Q9DBM2 [654-673]	1.60819e+06	36.11
	KGQGLTGPSLPPGTPTR		1	1	3	Q9DBM2	1	1663.91	832.46			7.721e-07	2.54	[R].KGQGLTGPSLPPGTPTR.[K]	Q9DBM2 [530-546]	1.82103e+06	23.83
	KIITSTLEK		1	1	1	Q9DBM2	1	1032.63	516.818			0.0001477	2.91	[K].KIITSTLEK.[E]	Q9DBM2 [336-344]	2.03848e+06	17.81
	LAPETCVR	1xCarbamidomethyl [C6]	1	1	1	Q9DBM2	0	945.482	473.244			0.01016	1.73	[R].LAPETCVR.[S]	Q9DBM2 [226-233]	1.82389e+06	16.8
	LCNPPVNAISPTVITEVR	1xCarbamidomethyl [C2]	1	1	2	Q9DBM2	0	1980.06	990.529			1.889e-08	3.49	[R].LCNPPVNAISPTVITEVR.[N]	Q9DBM2 [16-33]
	LGILDVVVK		1	1	1	Q9DBM2	0	955.619	478.312			0.0006237	2.3	[K].LGILDVVVK.[S]	Q9DBM2 [164-172]	2.73625e+06	39.15
	IGVVVGNCYGFVGNR	1xCarbamidomethyl [C8]	1	1	1	Q9DBM2	0	1610.81	805.907			2.057e-06	3	[K].IGVVVGNCYGFVGNR.[M]	Q9DBM2 [464-478]	1.04609e+06	33.35
	LLEVIPSR		1	1	1	Q9DBM2	0	926.567	463.787			0.006571	2.16	[R].LLEVIPSR.[Y]	Q9DBM2 [437-444]	9115482	29.03
	ILNKPVPSLPNMDSVFAEAIAK		1	1	1	Q9DBM2	0	2354.28	785.431			4.775e-05	2.2	[R].ILNKPVPSLPNMDSVFAEAIAK.[V]	Q9DBM2 [196-217]	495081	43.51
	ILNKPVPSLPNMDSVFAEAIAK	1xOxidation [M12]	1	1	2	Q9DBM2	0	2370.27	790.765			5.943e-07	2.79	[R].ILNKPVPSLPNMDSVFAEAIAK.[V]	Q9DBM2 [196-217]	796326	37.49
	IITSTLEK		1	1	1	Q9DBM2	0	904.535	452.77			0.01681	2.09	[K].IITSTLEK.[E]	Q9DBM2 [337-344]	5.51065e+06	20.06
	LPHSLAMIR		1	1	2	Q9DBM2	0	1037.59	346.536			0.0001297	2.17	[R].LPHSLAMIR.[L]	Q9DBM2 [7-15]	3091466	26.04
	LPHSLAMIR	1xOxidation [M7]	1	1	2	Q9DBM2	0	1053.59	351.867			0.002275	1.96	[R].LPHSLAMIR.[L]	Q9DBM2 [7-15]	3.73127e+06	22.6
	QNPDIPQLEPSDYLR		1	1	2	Q9DBM2	0	1784.88	892.942			1.189e-05	2.14	[R].QNPDIPQLEPSDYLR.[R]	Q9DBM2 [680-694]	1.47518e+06	36.61
	QNPDIPQLEPSDYLRR		1	1	1	Q9DBM2	1	1940.98	647.663			0.001428	2.18	[R].QNPDIPQLEPSDYLRR.[L]	Q9DBM2 [680-695]	660101	33.27
	SDPVEEAIK		1	1	1	Q9DBM2	0	987.499	494.252			0.01377	1.87	[K].SDPVEEAIK.[F]	Q9DBM2 [173-181]	1.41273e+06	21.79
	SGQASAKPNLR		1	1	2	Q9DBM2	0	1128.61	376.875			1.273e-05	2.34	[K].SGQASAKPNLR.[F]	Q9DBM2 [349-359]	2723930	10.59
	SISKEEILER		1	1	1	Q9DBM2	1	1203.66	401.89			0.0007933	2.65	[R].SISKEEILER.[C]	Q9DBM2 [608-617]	3.59156e+06	20.48
	SPTGLTLGSLVDEIQR		1	1	3	Q9DBM2	0	1685.91	843.46			1.503e-10	3.46	[K].SPTGLTLGSLVDEIQR.[Y]	Q9DBM2 [68-83]	2.16795e+06	42.53
	TASAQPVSSVGVLGLGTMGR		1	1	2	Q9DBM2	0	1888	944.497			2.127e-07	3.19	[K].TASAQPVSSVGVLGLGTMGR.[G]	Q9DBM2 [289-308]	1.31951e+06	36.84
	TASAQPVSSVGVLGLGTMGR	1xOxidation [M18]	1	1	2	Q9DBM2	0	1903.99	952.5			4.653e-10	3.89	[K].TASAQPVSSVGVLGLGTMGR.[G]	Q9DBM2 [289-308]	5.2041e+06	33.31
	VGFPEVMLGILPGAR		1	1	1	Q9DBM2	0	1555.87	778.436			1.335e-06	1.96	[R].VGFPEVMLGILPGAR.[G]	Q9DBM2 [118-132]	307657	48.84
	VGFPEVMLGILPGAR	1xOxidation [M7]	1	1	1	Q9DBM2	0	1571.86	524.625			0.02194	1.17	[R].VGFPEVMLGILPGAR.[G]	Q9DBM2 [118-132]	211926	43.58
	VGIPVVAVESDPK		1	1	2	Q9DBM2	0	1309.74	655.37			3.726e-06	2.9	[R].VGIPVVAVESDPK.[Q]	Q9DBM2 [317-329]	15211857	31.48
	VVGVPVALDLITSGR		1	1	4	Q9DBM2	0	1495.88	748.447			5.414e-06	2.47	[R].VVGVPVALDLITSGR.[H]	Q9DBM2 [140-154]	5.66733e+06	44.44
	YSPIADMLCEAGR	1xCarbamidomethyl [C9]	1	1	1	Q9DBM2	0	1482.67	741.84			8.279e-05	1.88	[R].YSPIADMLCEAGR.[F]	Q9DBM2 [553-565]	280307	37.48
	YSPIADMLCEAGR	1xCarbamidomethyl [C9]; 1xOxidation [M7]	1	1	1	Q9DBM2	0	1498.67	749.833			0.004515	1.51	[R].YSPIADMLCEAGR.[F]	Q9DBM2 [553-565]	626492	28.28
	YSSPTTIATVMSLSK		1	1	1	Q9DBM2	0	1585.81	793.41			1.283e-06	3.08	[R].YSSPTTIATVMSLSK.[R]	Q9DBM2 [445-459]	1.77791e+06	36.53
	YSSPTTIATVMSLSK	1xOxidation [M11]	1	1	2	Q9DBM2	0	1601.81	801.408			2.283e-06	2.6	[R].YSSPTTIATVMSLSK.[R]	Q9DBM2 [445-459]	2.93071e+06	30.2
Q80X90	Filamin-B OS=Mus musculus OX=10090 GN=Flnb PE=1 SV=3	109.73	29	59	76	57	2602	277.7	5.71
	Sequence	Modifications	# Protein Groups	# Proteins	# PSMs	Master Protein Accessions	# Missed Cleavages	Theo. MH+ [Da]	m/z [Da] (by Search Engine): Sequest HT			Percolator PEP (by Search Engine): Sequest HT	XCorr (by Search Engine): Sequest HT	Annotated Sequence	Positions in Master Proteins	Abundance: F5: Sample	Top Apex RT [min]
	AAGSGELGVTVK		1	1	1	Q80X90	0	1088.59	544.802			4.435e-05	2.77	[K].AAGSGELGVTVK.[G]	Q80X90 [481-492]	1.73946e+06	21.18
	ADIEMPFDPSK	1xOxidation [M5]	1	1	1	Q80X90	0	1265.57	633.29			0.0003493	2.07	[K].ADIEMPFDPSK.[V]	Q80X90 [1125-1135]	577962	26.61
	AFGPGIEGK		1	1	1	Q80X90	0	875.462	438.234			0.004467	1.67	[K].AFGPGIEGK.[D]	Q80X90 [1233-1241]	12957794	21.25
	AGLAPLEVR		1	1	1	Q80X90	0	925.547	463.277			0.001121	2.41	[K].AGLAPLEVR.[V]	Q80X90 [1450-1458]
	AHGPGLEGGLVGKPAEFTIDTK		1	1	2	Q80X90	0	2194.15	732.057			2.939e-08	2.9	[K].AHGPGLEGGLVGKPAEFTIDTK.[G]	Q80X90 [1045-1066]	878576	31.13
	APAVATVGSICDLNLK	1xCarbamidomethyl [C11]	1	1	1	Q80X90	0	1628.87	814.936			0.0002702	1.91	[R].APAVATVGSICDLNLK.[I]	Q80X90 [2105-2120]
	APLNVQFSSPLPGEAVK		1	1	1	Q80X90	0	1753.95	877.476			2.401e-08	3.67	[K].APLNVQFSSPLPGEAVK.[D]	Q80X90 [878-894]
	ATPEIVDNKDGTVTVR		1	1	2	Q80X90	1	1714.9	572.308			4.36e-06	2.36	[K].ATPEIVDNKDGTVTVR.[Y]	Q80X90 [1772-1787]	415626	23.83
	DAGEGLLAVQITDQEGKPQR		1	1	1	Q80X90	0	2125.09	709.037			6.639e-11	3.84	[R].DAGEGLLAVQITDQEGKPQR.[A]	Q80X90 [1546-1565]	569534	31.99
	DLDIIDNYDYSHTVK		1	1	2	Q80X90	0	1810.85	905.926			0.00534	1.27	[K].DLDIIDNYDYSHTVK.[Y]	Q80X90 [895-909]	493459	33.39
	EATTDFTVDSRPLTQVGGDHIK		1	1	2	Q80X90	0	2387.18	796.399			3.271e-06	3.32	[R].EATTDFTVDSRPLTQVGGDHIK.[A]	Q80X90 [1246-1267]	559469	29.23
	EVGEHLVSIK		1	1	1	Q80X90	0	1110.62	555.81			0.03334	1.06	[R].EVGEHLVSIK.[K]	Q80X90 [1970-1979]
	EVGEHLVSIKK		1	1	1	Q80X90	1	1238.71	413.574			0.02721	1.48	[R].EVGEHLVSIKK.[N]	Q80X90 [1970-1980]
	FADEHVPGSPFTVK		1	1	2	Q80X90	0	1530.76	765.881			1.175e-05	2.54	[K].FADEHVPGSPFTVK.[I]	Q80X90 [2075-2088]	2.21445e+06	28.8
	FNDEHIPDSPYLVPVIAPSDDAR		1	1	1	Q80X90	0	2567.24	856.415			6.952e-10	4	[K].FNDEHIPDSPYLVPVIAPSDDAR.[C]	Q80X90 [2266-2288]	647240	39.17
	FVPQEMGVHTVSVK		1	1	1	Q80X90	0	1557.81	779.41			0.04005	1.04	[R].FVPQEMGVHTVSVK.[Y]	Q80X90 [2157-2170]
	FVPQEMGVHTVSVK	1xOxidation [M6]	1	1	1	Q80X90	0	1573.8	787.404			0.04738	0.83	[R].FVPQEMGVHTVSVK.[Y]	Q80X90 [2157-2170]
	GAGIGGLGITVEGPSESK		1	1	1	Q80X90	0	1628.85	814.927			2.293e-07	3.03	[R].GAGIGGLGITVEGPSESK.[I]	Q80X90 [1355-1372]	930515	33.09
	GDYVLAVK		1	1	1	Q80X90	0	864.483	432.746			0.0846	1.51	[R].GDYVLAVK.[W]	Q80X90 [2579-2586]	930419	24.37
	GQHVTGSPFQFTVGPLGEGGAHK		1	1	1	Q80X90	0	2308.15	577.791			0.0003388	1.95	[R].GQHVTGSPFQFTVGPLGEGGAHK.[V]	Q80X90 [2173-2195]
	KATPEIVDNKDGTVTVR		1	1	1	Q80X90	2	1842.99	615.002			0.002223	1.32	[K].KATPEIVDNKDGTVTVR.[Y]	Q80X90 [1771-1787]
	LDVTILSPSR		1	1	1	Q80X90	0	1100.63	550.819			0.0001871	1.9	[K].LDVTILSPSR.[K]	Q80X90 [977-986]
	IGNLQTDLSDGLR		1	1	1	Q80X90	0	1401.73	701.37			5.045e-08	3.71	[R].IGNLQTDLSDGLR.[L]	Q80X90 [37-49]	1.71213e+06	31.63
	LGSAADFLLDISETDLSTLTASIK		1	1	1	Q80X90	0	2481.3	827.77			0.008241	1.04	[K].LGSAADFLLDISETDLSTLTASIK.[A]	Q80X90 [1920-1943]	121695	53.6
	LKPGAPLKPK		1	1	1	Q80X90	0	1048.69	350.233			0.02125	1.26	[K].LKPGAPLKPK.[L]	Q80X90 [242-251]	1.48847e+06	14.12
	LIALLEVLSQKR		1	2	2	Q80X90	1	1382.87	461.629			0.0001016	1.5	[R].LIALLEVLSQKR.[M]	Q80X90 [50-61]	295826	42.2
	ILAQDGEGQPIDIQMK	1xOxidation [M15]	1	1	1	Q80X90	0	1771.89	886.45			3.733e-05	2.25	[K].ILAQDGEGQPIDIQMK.[S]	Q80X90 [682-697]	412140	26.94
	LPNNHIGISFIPR		1	1	1	Q80X90	0	1477.83	493.279			5.509e-05	3.01	[R].LPNNHIGISFIPR.[E]	Q80X90 [1957-1969]	519152	33.13
	LVSPGSANETSSILVESVTR		1	1	2	Q80X90	0	2046.07	1023.54			2.433e-07	3.1	[R].LVSPGSANETSSILVESVTR.[S]	Q80X90 [2476-2495]	851744	35.89
	NSVELLVEDR		1	1	1	Q80X90	0	1173.61	587.31			0.0001338	2.17	[K].NSVELLVEDR.[G]	Q80X90 [400-409]	1.17409e+06	28.96
	QQYNVTYVVK		1	1	1	Q80X90	0	1241.65	621.329			0.002983	1.98	[K].QQYNVTYVVK.[E]	Q80X90 [2567-2576]	984613	25.33
	SPFEVNVDK		1	1	1	Q80X90	0	1034.52	517.76			0.01608	1.37	[K].SPFEVNVDK.[A]	Q80X90 [341-349]	1.83919e+06	24.95
	SPFEVNVDKAQGDASK		1	1	1	Q80X90	1	1691.82	564.611			0.0002443	2.15	[K].SPFEVNVDKAQGDASK.[V]	Q80X90 [341-356]
	SPFEVQVGPEAGMQK		1	1	2	Q80X90	0	1603.78	802.389			6.388e-06	2.57	[K].SPFEVQVGPEAGMQK.[V]	Q80X90 [537-551]	419739	30.91
	SPFEVQVGPEAGMQK	1xOxidation [M13]	1	1	1	Q80X90	0	1619.77	810.39			1.625e-08	2.81	[K].SPFEVQVGPEAGMQK.[V]	Q80X90 [537-551]	850093	28.52
	SPFTVGVAAPLDLSK		1	1	1	Q80X90	0	1501.83	751.414			3.168e-09	3.47	[K].SPFTVGVAAPLDLSK.[I]	Q80X90 [932-946]	2311917	38.9
	SSFLVDCSK	1xCarbamidomethyl [C7]	1	1	1	Q80X90	0	1042.49	521.747			0.0407	1.02	[K].SSFLVDCSK.[A]	Q80X90 [2531-2539]
	TFEMSDFIVDTR		1	1	1	Q80X90	0	1460.67	730.837			3.515e-06	2.81	[R].TFEMSDFIVDTR.[D]	Q80X90 [2017-2028]	337021	39.59
	TFEMSDFIVDTR	1xOxidation [M4]	1	1	1	Q80X90	0	1476.67	738.835			4.965e-06	2.2	[R].TFEMSDFIVDTR.[D]	Q80X90 [2017-2028]	603039	31.99
	TGEEVGFVVDAK		1	1	1	Q80X90	0	1250.63	625.819			1.827e-05	2.75	[K].TGEEVGFVVDAK.[T]	Q80X90 [1630-1641]	944599	27.83
	TYSVEYLPK		1	1	2	Q80X90	0	1099.57	550.285			0.02427	0.84	[K].TYSVEYLPK.[V]	Q80X90 [314-322]	1.91053e+06	27.51
	VAVTEGCQPSR	1xCarbamidomethyl [C7]	1	1	2	Q80X90	0	1203.58	602.29			0.004073	1.58	[K].VAVTEGCQPSR.[V]	Q80X90 [1320-1330]
	VHAQGPGLK		1	1	1	Q80X90	0	906.516	453.761			0.008393	1.12	[R].VHAQGPGLK.[E]	Q80X90 [1331-1339]	450991	11.54
	VKAEGPGLSK		1	1	1	Q80X90	1	985.568	493.286			0.0201	1.1	[K].VKAEGPGLSK.[A]	Q80X90 [848-857]	235544	12.57
	VLFASQEIPASPFR		1	1	1	Q80X90	0	1561.84	781.416			1.327e-06	3.39	[K].VLFASQEIPASPFR.[V]	Q80X90 [823-836]	1.22139e+06	38.91
	VLPTYDASK		1	1	1	Q80X90	0	993.525	497.266			0.01214	1.59	[K].VLPTYDASK.[V]	Q80X90 [1511-1519]	1.01955e+06	20.59
	VIVLFAGQHISK		1	1	2	Q80X90	0	1311.78	437.929			4.413e-06	2.5	[K].VIVLFAGQHISK.[S]	Q80X90 [329-340]	2.41242e+06	30.33
	VMYTPMAPGNYLIGVK	2xOxidation [M2; M6]	1	1	1	Q80X90	0	1785.89	893.445			0.02834	1.12	[K].VMYTPMAPGNYLIGVK.[Y]	Q80X90 [2440-2455]	440433	34.61
	VNQPASFAIR		1	1	2	Q80X90	0	1102.6	551.804			0.0002156	1.87	[K].VNQPASFAIR.[L]	Q80X90 [2302-2311]	1.44805e+06	25.17
	VTASGPGLSAYGVPASLPVEFAIDAR		1	1	1	Q80X90	0	2545.33	849.114			0.01047	1.05	[K].VTASGPGLSAYGVPASLPVEFAIDAR.[D]	Q80X90 [1520-1545]	209816	47.31
	VVASGPGLEHGK		1	1	2	Q80X90	0	1150.62	384.211			3.523e-06	1.98	[K].VVASGPGLEHGK.[V]	Q80X90 [1136-1147]	920508	14.44
	VVPCLVAPVAGR	1xCarbamidomethyl [C4]	1	1	1	Q80X90	0	1237.71	619.358			0.001056	1.38	[K].VVPCLVAPVAGR.[E]	Q80X90 [988-999]
	VYGQGLSEGR		1	1	1	Q80X90	0	1065.53	533.266			0.000212	2.19	[K].VYGQGLSEGR.[T]	Q80X90 [2007-2016]	1.62555e+06	17.68
	YADEEIPR		1	1	2	Q80X90	0	992.468	496.738			0.005944	2.27	[K].YADEEIPR.[S]	Q80X90 [1497-1504]	1336672	19.71
	YAPTEVGLHEMHIK	1xOxidation [M11]	1	1	1	Q80X90	0	1640.81	547.609			0.001305	1.02	[R].YAPTEVGLHEMHIK.[Y]	Q80X90 [1788-1801]
	YHQRPTFR		1	1	1	Q80X90	0	1104.57	368.862			0.02611	1.72	[K].YHQRPTFR.[Q]	Q80X90 [66-73]	872598	12.51
	YMIGVTYGGDNIPLSPYR	1xOxidation [M2]	1	1	1	Q80X90	0	2031.98	1016.5			1.673e-05	2.14	[R].YMIGVTYGGDNIPLSPYR.[I]	Q80X90 [1588-1605]
	YNDKHIPGSPFTAK		1	1	1	Q80X90	1	1574.8	525.603			0.003249	1.77	[K].YNDKHIPGSPFTAK.[I]	Q80X90 [1894-1907]	547676	21.87
	YTPTQQGNMQVLVTYGGDPIPK	1xOxidation [M9]	1	1	1	Q80X90	0	2423.19	808.399			0.01022	0.76	[K].YTPTQQGNMQVLVTYGGDPIPK.[S]	Q80X90 [910-931]
	YVPPAPGR		1	1	1	Q80X90	0	856.468	428.736			0.06681	0.88	[K].YVPPAPGR.[Y]	Q80X90 [811-818]	756798	17.07
	AGGPGLER		2	2	1	Q80X90; Q8BTM8	0	756.4	378.703			0.00195	1.9	[R].AGGPGLER.[GA]	Q80X90 [2198-2205]; Q8BTM8 [2243-2250]	595944	12.38
	IQQNTFTR		2	3	1	Q80X90; Q8BTM8	0	1007.53	504.267			0.02119	1.9	[K].IQQNTFTR.[W]	Q80X90 [17-24]; Q8BTM8 [44-51]	1081974	16.29
P46735	Unconventional myosin-Ib OS=Mus musculus OX=10090 GN=Myo1b PE=1 SV=3	103.53	39	40	58	40	1107	128.5	9.26
	Sequence	Modifications	# Protein Groups	# Proteins	# PSMs	Master Protein Accessions	# Missed Cleavages	Theo. MH+ [Da]	m/z [Da] (by Search Engine): Sequest HT			Percolator PEP (by Search Engine): Sequest HT	XCorr (by Search Engine): Sequest HT	Annotated Sequence	Positions in Master Proteins	Abundance: F5: Sample	Top Apex RT [min]
	AAHIFNESLVCHQIR	1xCarbamidomethyl [C11]	1	1	2	P46735	0	1794.91	598.976			5.484e-10	3.35	[K].AAHIFNESLVCHQIR.[Y]	P46735 [603-617]	1.25124e+06	26.94
	ALYPSSVGQPFQGAYLEINKNPK		1	1	1	P46735	1	2521.31	841.105			1.803e-13	5.32	[K].ALYPSSVGQPFQGAYLEINKNPK.[Y]	P46735 [924-946]	3.11593e+06	36.49
	ASVATLMR		1	1	1	P46735	0	848.466	424.736			0.009715	2.32	[K].ASVATLMR.[N]	P46735 [576-583]	5986774	23.22
	EICELTSIDQVVLER	1xCarbamidomethyl [C3]	1	1	1	P46735	0	1803.92	902.461			0.0006665	1.9	[K].EICELTSIDQVVLER.[A]	P46735 [308-322]
	EQLLQSNPVLEAFGNAK		1	2	3	P46735	0	1857.97	929.49			4.364e-08	3	[K].EQLLQSNPVLEAFGNAK.[T]	P46735 [140-156]	1.61358e+06	41.88
	FLNDTTLPHSCFR	1xCarbamidomethyl [C11]	1	1	1	P46735	0	1607.76	536.592			5.523e-05	1.74	[R].FLNDTTLPHSCFR.[I]	P46735 [499-511]	1.60288e+06	29.13
	GAEVNQVK		1	1	1	P46735	0	844.452	422.729			0.02354	1.14	[K].GAEVNQVK.[E]	P46735 [132-139]	336264	9.2
	GAEVNQVKEQLLQSNPVLEAFGNAK		1	1	1	P46735	1	2683.4	895.14			0.004628	1.88	[K].GAEVNQVKEQLLQSNPVLEAFGNAK.[T]	P46735 [132-156]	258876	42.09
	GDFLFSSDHLIEMATK		1	1	1	P46735	0	1810.87	604.293			0.01688	1.2	[K].GDFLFSSDHLIEMATK.[L]	P46735 [1032-1047]
	GDFLFSSDHLIEMATK	1xOxidation [M13]	1	1	2	P46735	0	1826.86	913.938			7.27e-09	3.05	[K].GDFLFSSDHLIEMATK.[L]	P46735 [1032-1047]	1850807	37.17
	KLKDAIEEK		1	1	1	P46735	2	1073.62	537.313			0.04026	1.33	[K].KLKDAIEEK.[I]	P46735 [949-957]	135006	12.47
	LEASELFK		1	1	1	P46735	0	936.504	468.754			0.01903	2.14	[K].LEASELFK.[D]	P46735 [913-920]	5.27354e+06	29.54
	IFLLTNNNLLLADQK		1	1	1	P46735	0	1729.98	865.496			9.137e-08	2.68	[R].IFLLTNNNLLLADQK.[S]	P46735 [978-992]	1.45291e+06	43.16
	LFSWIVNR		1	2	2	P46735	0	1034.58	517.791			0.002036	2	[R].LFSWIVNR.[I]	P46735 [360-367]	664641	38.05
	LGNIEFKPESR		1	1	2	P46735	0	1289.68	645.346			3.188e-06	3.37	[K].LGNIEFKPESR.[V]	P46735 [281-291]	9.39299e+06	23.86
	IIIAEVVNK		1	1	1	P46735	0	998.624	499.815			0.0007293	2.18	[K].IIIAEVVNK.[I]	P46735 [958-966]	13333257	28.53
	LIYEEKLEASELFK		1	1	1	P46735	1	1711.92	571.31			0.008745	1.41	[K].LIYEEKLEASELFK.[D]	P46735 [907-920]
	LNQVCATHQHFESR	1xCarbamidomethyl [C5]	1	1	1	P46735	0	1726.81	576.273			1.372e-09	3.51	[K].LNQVCATHQHFESR.[M]	P46735 [479-492]	547953	16.19
	LVMSYVAAVCGK	1xCarbamidomethyl [C10]	1	2	1	P46735	0	1297.66	649.335			4.665e-05	1.4	[K].LVMSYVAAVCGK.[G]	P46735 [120-131]	477893	32.25
	LVMSYVAAVCGK	1xCarbamidomethyl [C10]; 1xOxidation [M3]	1	2	1	P46735	0	1313.66	657.331			0.0007462	1.74	[K].LVMSYVAAVCGK.[G]	P46735 [120-131]	497231	26.65
	IYEFTLQR		1	1	1	P46735	0	1069.57	535.289			0.01593	1.9	[K].IYEFTLQR.[I]	P46735 [840-847]	6.97308e+06	30.69
	MPSLSPIDK		1	1	1	P46735	0	987.518	494.263			0.002125	2.41	[K].MPSLSPIDK.[N]	P46735 [860-868]	848152	26.97
	MPSLSPIDK	1xOxidation [M1]	1	1	1	P46735	0	1003.51	502.259			0.02088	1.21	[K].MPSLSPIDK.[N]	P46735 [860-868]	1.41586e+06	22.14
	NFHVFYQLLSGASEELLYK		1	1	1	P46735	0	2258.15	753.388			0.08343	1.35	[R].NFHVFYQLLSGASEELLYK.[L]	P46735 [204-222]	427924	50.29
	NFYELSPHIFALSDEAYR		1	1	2	P46735	0	2172.04	724.685			3.135e-09	3.37	[R].NFYELSPHIFALSDEAYR.[S]	P46735 [76-93]	1.72974e+06	41.64
	QAYEPCLER	1xCarbamidomethyl [C6]	1	1	1	P46735	0	1165.53	583.267			0.001918	2.15	[R].QAYEPCLER.[Y]	P46735 [636-644]	1.43129e+06	21.35
	QRLEDLATLIQK		1	1	1	P46735	1	1427.82	714.416			0.002449	2.58	[K].QRLEDLATLIQK.[I]	P46735 [702-713]	806120	33.52
	RPPTAGSQFK		1	1	2	P46735	0	1088.58	544.796			0.007625	2.14	[K].RPPTAGSQFK.[A]	P46735 [566-575]	3.86289e+06	13.05
	SLFPEGNPAK		1	1	1	P46735	0	1059.55	530.275			0.00274	1.57	[K].SLFPEGNPAK.[V]	P46735 [552-561]	11619280	25.43
	SLPIYSPEK		1	1	1	P46735	0	1033.56	517.282			0.0043	1.98	[R].SLPIYSPEK.[V]	P46735 [60-68]	1.7969e+06	25.75
	SLPIYSPEKVEDYR		1	1	4	P46735	1	1695.86	565.959			7.896e-08	2.61	[R].SLPIYSPEKVEDYR.[N]	P46735 [60-73]	3.19516e+06	29.67
	SSALVIQSYIR		1	1	1	P46735	0	1236.69	618.849			9.403e-05	3.19	[K].SSALVIQSYIR.[G]	P46735 [752-762]	5952070	33.72
	THFLLMK	1xOxidation [M6]	1	1	1	P46735	0	905.491	453.249			0.06641	1.93	[R].THFLLMK.[R]	P46735 [722-728]	797138	21.27
	TLFQLEDLR		1	1	2	P46735	0	1134.62	567.81			0.007243	1.54	[R].TLFQLEDLR.[K]	P46735 [692-700]	1.73571e+06	37.34
	TLFQLEDLRK		1	1	2	P46735	1	1262.71	421.574			8.155e-05	2.05	[R].TLFQLEDLRK.[Q]	P46735 [692-701]	1.46302e+07	32.2
	VLYQVEGFVDK		1	1	1	P46735	0	1296.68	648.844			0.0002092	1.98	[K].VLYQVEGFVDK.[N]	P46735 [519-529]	793893	32.65
	VLYQVEGFVDKNNDLLYR		1	1	1	P46735	1	2185.13	729.049			3.583e-13	4.21	[K].VLYQVEGFVDKNNDLLYR.[D]	P46735 [519-536]	2.26041e+06	37.45
	VNGVDDAANFR		1	1	1	P46735	0	1177.56	589.282			0.005338	1.56	[K].VNGVDDAANFR.[T]	P46735 [242-252]	5443552	22.09
	VSMSSQNDGFFAVHLK		1	1	1	P46735	0	1766.85	589.62			0.007865	1.41	[K].VSMSSQNDGFFAVHLK.[E]	P46735 [1008-1023]
	VSMSSQNDGFFAVHLK	1xOxidation [M3]	1	1	1	P46735	0	1782.85	594.956			9.294e-05	2.73	[K].VSMSSQNDGFFAVHLK.[E]	P46735 [1008-1023]	1.17869e+06	31.04
	VSTTLNVAQAYYAR		1	1	2	P46735	0	1556.81	778.906			4.262e-08	3.6	[K].VSTTLNVAQAYYAR.[D]	P46735 [336-349]	8.70403e+06	30.26
	YLGLLENVR		1	2	1	P46735	0	1076.61	538.808			0.001211	2.08	[R].YLGLLENVR.[V]	P46735 [618-626]	12102031	33.97
	YNYLSLDSAK		1	1	2	P46735	0	1173.58	587.292			0.000124	2.55	[R].YNYLSLDSAK.[V]	P46735 [232-241]	7958006	28.81
	YRDQFTDQQK		1	1	1	P46735	1	1328.62	664.814			7.941e-05	2.51	[K].YRDQFTDQQK.[L]	P46735 [897-906]	1.11574e+06	14.75
P55096	ATP-binding cassette sub-family D member 3 OS=Mus musculus OX=10090 GN=Abcd3 PE=1 SV=2	93.01	43	29	58	29	659	75.4	9.26
	Sequence	Modifications	# Protein Groups	# Proteins	# PSMs	Master Protein Accessions	# Missed Cleavages	Theo. MH+ [Da]	m/z [Da] (by Search Engine): Sequest HT			Percolator PEP (by Search Engine): Sequest HT	XCorr (by Search Engine): Sequest HT	Annotated Sequence	Positions in Master Proteins	Abundance: F5: Sample	Top Apex RT [min]
	AVVDKVFLSR		1	1	2	P55096	1	1133.67	378.559			0.000575	2.39	[R].AVVDKVFLSR.[L]	P55096 [57-66]	1.59824e+07	26.21
	DQVIYPDGKEDQK		1	1	2	P55096	1	1534.74	767.871			3.043e-06	3.16	[R].DQVIYPDGKEDQK.[K]	P55096 [521-533]	1.26186e+07	17.94
	DQVIYPDGKEDQKK		1	1	2	P55096	2	1662.83	554.949			4.889e-07	3.36	[R].DQVIYPDGKEDQKK.[R]	P55096 [521-534]	1.21312e+06	15.6
	EKQTIHSVFR		1	1	2	P55096	1	1244.67	415.562			0.0003792	1.74	[R].EKQTIHSVFR.[K]	P55096 [288-297]	5.58396e+06	17.26
	EYLDNVQLGHILER		1	1	2	P55096	0	1698.88	849.946			9.272e-09	3.62	[K].EYLDNVQLGHILER.[E]	P55096 [544-557]	8.01099e+06	35.86
	FDHVPLATPNGDILIQDLSFEVR		1	1	1	P55096	0	2596.34	866.118			0.00484	1.33	[K].FDHVPLATPNGDILIQDLSFEVR.[S]	P55096 [442-464]	118102	47.11
	FSMGFIDSIIAK	1xOxidation [M3]	1	1	1	P55096	0	1344.69	672.847			6.825e-05	2	[R].FSMGFIDSIIAK.[Y]	P55096 [311-322]	982633	39.64
	GKLFYVPQRPYMTLGTLR		1	1	1	P55096	1	2140.17	535.799			0.0151	2.04	[R].GKLFYVPQRPYMTLGTLR.[D]	P55096 [503-520]	2.16867e+06	35.98
	GKLFYVPQRPYMTLGTLR	1xOxidation [M12]	1	1	1	P55096	1	2156.17	539.797			4.883e-05	2.76	[R].GKLFYVPQRPYMTLGTLR.[D]	P55096 [503-520]	1.85538e+06	32.93
	GIEGAQASPLVPGAGEIINTDNIIK		1	1	1	P55096	0	2477.32	1239.17			2.061e-09	3.51	[K].GIEGAQASPLVPGAGEIINTDNIIK.[F]	P55096 [417-441]	1.03614e+06	42.05
	HHEYYLHMDGR		1	1	2	P55096	0	1457.64	486.549			1.528e-09	4.27	[K].HHEYYLHMDGR.[G]	P55096 [632-642]
	HHEYYLHMDGR	1xOxidation [M8]	1	1	1	P55096	0	1473.63	491.881			0.00923	1.59	[K].HHEYYLHMDGR.[G]	P55096 [632-642]	1.10401e+06	13.87
	HLHSTHSELLEDYYQSGR		1	1	1	P55096	0	2172.01	1086.51			0.001403	1.79	[R].HLHSTHSELLEDYYQSGR.[M]	P55096 [345-362]	322816	24.06
	KLVEHLHNFIFFR		1	1	1	P55096	1	1699.94	567.321			0.006041	1.57	[R].KLVEHLHNFIFFR.[F]	P55096 [298-310]	1.25328e+06	35.03
	KSGKPPLQNNEK		1	1	1	P55096	1	1339.73	447.249			0.04158	1.37	[K].KSGKPPLQNNEK.[E]	P55096 [39-50]	1.24157e+06	6.38
	KVGITLFTVSHR		1	1	2	P55096	1	1357.8	679.4			3.982e-07	3.51	[R].KVGITLFTVSHR.[K]	P55096 [615-626]	6.67156e+06	27.93
	KVGITLFTVSHRK		1	1	2	P55096	2	1485.89	495.967			4.06e-09	3.44	[R].KVGITLFTVSHRK.[S]	P55096 [615-627]	697742	24.24
	IANPDQLLTQDVEK		1	1	4	P55096	0	1583.83	792.417			2.844e-08	3.33	[R].IANPDQLLTQDVEK.[F]	P55096 [182-195]	1.24922e+07	32.63
	LFYVPQRPYMTLGTLR	1xOxidation [M10]	1	1	1	P55096	0	1971.05	657.688			0.003531	1.94	[K].LFYVPQRPYMTLGTLR.[D]	P55096 [505-520]	5.9295e+06	35.63
	LITNSEEIAFYNGNKR		1	1	1	P55096	1	1868.95	934.979			8.794e-08	2.7	[R].LITNSEEIAFYNGNKR.[E]	P55096 [272-287]
	ITELMQVLK		1	1	1	P55096	0	1074.62	537.814			0.02523	0.91	[R].ITELMQVLK.[D]	P55096 [391-399]	14996738	34.42
	ITELMQVLK	1xOxidation [M5]	1	1	2	P55096	0	1090.62	545.812			0.001105	2.58	[R].ITELMQVLK.[D]	P55096 [391-399]	17814100	28.85
	LVEHLHNFIFFR		1	1	3	P55096	0	1571.85	524.619			5.674e-09	3.48	[K].LVEHLHNFIFFR.[F]	P55096 [299-310]	56634841	36.34
	MGNLDNR		1	1	2	P55096	0	819.378	410.192			0.03781	1.18	[K].MGNLDNR.[I]	P55096 [175-181]	876275	11.99
	MGNLDNR	1xOxidation [M1]	1	1	1	P55096	0	835.373	418.189			0.0541	1.74	[K].MGNLDNR.[I]	P55096 [175-181]	662048	6.49
	MSQALGR		1	1	1	P55096	0	762.393	381.699			0.0775	2.05	[R].MSQALGR.[I]	P55096 [367-373]	2.1457e+06	12.74
	MSQALGR	1xOxidation [M1]	1	1	3	P55096	0	778.388	389.697			0.02802	2.02	[R].MSQALGR.[I]	P55096 [367-373]	1.08794e+06	8.24
	MTIMEQK		1	1	1	P55096	0	880.427	440.715			0.05356	1.96	[K].MTIMEQK.[Y]	P55096 [254-260]	754654	18.72
	MTIMEQK	1xOxidation [M4]	1	1	1	P55096	0	896.422	448.713			0.04456	1.74	[K].MTIMEQK.[Y]	P55096 [254-260]	475769	13.96
	MTIMEQKYEGEYR		1	1	2	P55096	1	1677.76	559.922			2.38e-07	3.07	[K].MTIMEQKYEGEYR.[Y]	P55096 [254-266]
	MTIMEQKYEGEYR	1xOxidation [M4]	1	1	2	P55096	1	1693.76	565.256			1.648e-06	3.32	[K].MTIMEQKYEGEYR.[Y]	P55096 [254-266]	417324	21.63
	MTIMEQKYEGEYR	2xOxidation [M1; M4]	1	1	2	P55096	1	1709.75	570.588			7.963e-07	2.88	[K].MTIMEQKYEGEYR.[Y]	P55096 [254-266]	2.59447e+06	18.84
	QTIHSVFR		1	1	1	P55096	0	987.537	494.27			0.02572	1.64	[K].QTIHSVFR.[K]	P55096 [290-297]	1.35136e+06	19.08
	SGKPPLQNNEK		1	1	2	P55096	0	1211.64	404.55			0.001356	1.4	[K].SGKPPLQNNEK.[E]	P55096 [40-50]	2.33726e+06	8.51
	TMVSQQEK		1	1	1	P55096	0	950.461	475.733			0.01511	1.36	[R].TMVSQQEK.[G]	P55096 [409-416]	1.04822e+06	9.4
	VGITLFTVSHR		1	1	1	P55096	0	1229.7	615.353			7.431e-06	3.3	[K].VGITLFTVSHR.[K]	P55096 [616-626]	2.81385e+06	32.25
	YLYEEYLQAFTYYK		1	1	1	P55096	0	1893.89	947.448			5.937e-06	1.12	[R].YLYEEYLQAFTYYK.[M]	P55096 [161-174]	687550	46.2
Q62261	Spectrin beta chain, non-erythrocytic 1 OS=Mus musculus OX=10090 GN=Sptbn1 PE=1 SV=2	90.13	27	55	72	55	2363	274.1	5.58
	Sequence	Modifications	# Protein Groups	# Proteins	# PSMs	Master Protein Accessions	# Missed Cleavages	Theo. MH+ [Da]	m/z [Da] (by Search Engine): Sequest HT			Percolator PEP (by Search Engine): Sequest HT	XCorr (by Search Engine): Sequest HT	Annotated Sequence	Positions in Master Proteins	Abundance: F5: Sample	Top Apex RT [min]
	AFEDEMSGR	1xOxidation [M6]	1	1	1	Q62261	0	1057.43	529.216			0.00592	1.34	[R].AFEDEMSGR.[S]	Q62261 [682-690]	386464	13.26
	AQTLPTSVVTITSESSPGKR		1	1	1	Q62261	1	2059.1	687.039			1.352e-05	3.08	[R].AQTLPTSVVTITSESSPGKR.[E]	Q62261 [2325-2344]	467818	29.69
	DGMAFNALIHK	1xOxidation [M3]	1	1	1	Q62261	0	1232.61	616.808			0.003797	1.52	[R].DGMAFNALIHK.[H]	Q62261 [204-214]	449453	26.73
	DLVAIEAK		1	1	1	Q62261	0	858.493	429.749			0.07507	1.39	[R].DLVAIEAK.[L]	Q62261 [1004-1011]	1.26153e+06	25
	DQNTVETLQR		1	1	1	Q62261	0	1203.6	602.301			0.0004947	2.93	[R].DQNTVETLQR.[M]	Q62261 [1835-1844]	1.00348e+06	18.56
	DVSSVELLMNNHQGIK	1xOxidation [M9]	1	1	1	Q62261	0	1799.9	600.635			0.005449	1.3	[R].DVSSVELLMNNHQGIK.[A]	Q62261 [1942-1957]
	EAASELLMR		1	1	1	Q62261	0	1019.52	510.261			0.003928	1.82	[R].EAASELLMR.[L]	Q62261 [1262-1270]	10864087	26.1
	EAEKLESEHPDQAQAILSR		1	1	2	Q62261	1	2151.07	717.695			2.455e-11	3.21	[K].EAEKLESEHPDQAQAILSR.[L]	Q62261 [1018-1036]
	EGMQLISEKPETEAVVK	1xOxidation [M3]	1	1	2	Q62261	0	1903.97	635.32			0.001598	1.67	[K].EGMQLISEKPETEAVVK.[E]	Q62261 [1336-1352]
	ELEAENYHDIKR		1	1	3	Q62261	1	1516.74	506.25			4.501e-07	3.03	[R].ELEAENYHDIKR.[I]	Q62261 [487-498]
	EIGQSVDEVEK		1	1	1	Q62261	0	1232.6	616.8			0.003023	2.33	[R].EIGQSVDEVEK.[L]	Q62261 [2044-2054]	1.73757e+06	19.75
	FANSLVGVQQQLQAFNTYR		1	1	1	Q62261	0	2184.12	728.713			0.05387	1.13	[K].FANSLVGVQQQLQAFNTYR.[T]	Q62261 [330-348]	329892	41.87
	FESLEPEMNNQASR		1	1	1	Q62261	0	1651.74	826.374			0.04516	1.03	[R].FESLEPEMNNQASR.[V]	Q62261 [891-904]
	FMELLEPLSER	1xOxidation [M2]	1	1	1	Q62261	0	1379.69	690.344			0.0009331	1.94	[K].FMELLEPLSER.[K]	Q62261 [1467-1477]	861937	34.57
	FQIQDISVETEDNKEK		1	1	2	Q62261	1	1922.93	641.65			2.651e-09	3.66	[R].FQIQDISVETEDNKEK.[K]	Q62261 [157-172]	1.28056e+06	29.24
	FQIQDISVETEDNKEKK		1	1	1	Q62261	2	2051.03	684.351			0.003475	1.32	[R].FQIQDISVETEDNKEKK.[S]	Q62261 [157-173]	319876	26.82
	GNLEVLLFTIQSK		1	1	1	Q62261	0	1461.83	731.424			0.000245	2.28	[K].GNLEVLLFTIQSK.[M]	Q62261 [360-372]	449248	44.97
	HLLGVEDLLQK		1	1	1	Q62261	0	1264.73	632.863			0.0001109	2.13	[K].HLLGVEDLLQK.[H]	Q62261 [559-569]	724691	35.01
	HQILEQAVEDYAETVHQLSK		1	1	2	Q62261	0	2338.17	780.063			7.496e-06	1.3	[K].HQILEQAVEDYAETVHQLSK.[T]	Q62261 [1634-1653]	175041	40.33
	HRPDLIDFDK		1	2	2	Q62261	0	1255.64	419.218			9.418e-07	3.77	[K].HRPDLIDFDK.[L]	Q62261 [215-224]	2.95876e+06	24.51
	KKEIEELQSQAQALSQEGK		1	1	1	Q62261	2	2144.12	715.374			0.005695	1.21	[R].KKEIEELQSQAQALSQEGK.[S]	Q62261 [1433-1451]
	LAGIEER		1	1	1	Q62261	0	787.431	394.217			0.04396	1.51	[R].LAGIEER.[C]	Q62261 [824-830]	1.28706e+06	17.27
	IDDIFER		1	1	1	Q62261	0	907.452	454.229			0.08087	2	[R].IDDIFER.[S]	Q62261 [1541-1547]	1.62634e+06	27.54
	IHCLENVDK	1xCarbamidomethyl [C3]	1	2	2	Q62261	0	1127.55	564.279			0.01491	1.32	[R].IHCLENVDK.[A]	Q62261 [110-118]	707577	15.93
	LLDPEDISVDHPDEK		1	1	2	Q62261	0	1721.82	861.412			3.324e-06	2.71	[K].LLDPEDISVDHPDEK.[S]	Q62261 [250-264]	2.12994e+06	28.94
	LLEVLSGER		1	1	1	Q62261	0	1015.58	508.292			0.001659	2.4	[K].LLEVLSGER.[L]	Q62261 [91-99]	2.31038e+06	29.25
	LILEVHQFSR		1	1	2	Q62261	0	1241.7	414.571			2.784e-05	2.37	[R].LILEVHQFSR.[D]	Q62261 [2015-2024]	1635179	29.06
	LISDINK		1	1	1	Q62261	0	802.467	401.737			0.04312	1.59	[K].LISDINK.[A]	Q62261 [388-394]	3.9527e+06	17.88
	ILSSDDYGKDLTSVMR		1	1	1	Q62261	1	1799.88	600.632			0.07923	1.03	[K].ILSSDDYGKDLTSVMR.[L]	Q62261 [660-675]
	ILSSDDYGKDLTSVMR	1xOxidation [M15]	1	1	1	Q62261	1	1815.88	605.965			0.0001308	1.48	[K].ILSSDDYGKDLTSVMR.[L]	Q62261 [660-675]
	LPEELGRDQNTVETLQR		1	1	1	Q62261	1	1998.03	666.679			0.01158	1.45	[K].LPEELGRDQNTVETLQR.[M]	Q62261 [1828-1844]
	LQAAYAGDK		1	1	1	Q62261	0	936.479	468.743			0.08654	1.2	[R].LQAAYAGDK.[A]	Q62261 [1870-1878]	356108	14.71
	LQAAYAGDKADDIQKR		1	1	1	Q62261	2	1762.91	588.307			7.427e-07	3.05	[R].LQAAYAGDKADDIQKR.[E]	Q62261 [1870-1885]	998534	17.73
	ITDLYTDLR		1	1	1	Q62261	0	1109.58	555.294			0.002891	2.32	[R].ITDLYTDLR.[D]	Q62261 [75-83]	940960	29.47
	ITDLYTDLRDGR		1	1	1	Q62261	1	1437.73	479.915			0.004023	1.62	[R].ITDLYTDLRDGR.[M]	Q62261 [75-86]
	LTTLELLEVR		1	1	2	Q62261	0	1186.7	593.854			0.0001516	2.5	[R].LTTLELLEVR.[R]	Q62261 [2079-2088]	1.2952e+06	38.86
	LTTLELLEVRR		1	1	1	Q62261	1	1342.81	448.272			0.009202	1.25	[R].LTTLELLEVRR.[Q]	Q62261 [2079-2089]
	LVDTGDKFR		1	1	2	Q62261	1	1050.56	350.856			1.498e-05	2.73	[R].LVDTGDKFR.[F]	Q62261 [1907-1915]	1.71545e+06	17.51
	LVSDGNINSDR		1	1	1	Q62261	0	1189.58	595.293			0.0001467	1.81	[R].LVSDGNINSDR.[I]	Q62261 [1235-1245]
	IVSSNDVGHDEYSTQSLVK		1	1	1	Q62261	0	2078	693.338			9.725e-08	2.25	[K].IVSSNDVGHDEYSTQSLVK.[K]	Q62261 [766-784]	1.02033e+06	24.77
	MHTTFEHDIQALGTQVR	1xOxidation [M1]	1	1	1	Q62261	0	1999.97	667.325			6.118e-05	2.2	[R].MHTTFEHDIQALGTQVR.[Q]	Q62261 [1845-1861]	406800	28.96
	QALQDTLALYK		1	1	1	Q62261	0	1263.69	632.356			0.01892	0.95	[K].QALQDTLALYK.[M]	Q62261 [843-853]
	QLQEDAAR		1	1	1	Q62261	0	930.464	465.735			0.03256	1.06	[R].QLQEDAAR.[L]	Q62261 [1862-1869]	119714	10.7
	SALPAQSAATLPAR		1	1	1	Q62261	0	1353.75	677.377			2.287e-05	2.89	[K].SALPAQSAATLPAR.[T]	Q62261 [2177-2190]
	SQNIITDSSSLNAEAIR		1	1	2	Q62261	0	1818.92	909.964			8.003e-10	3.01	[R].SQNIITDSSSLNAEAIR.[Q]	Q62261 [1548-1564]	927015	30.89
	TLETPAAQMEGFLNR		1	1	1	Q62261	0	1677.83	839.416			5.275e-05	1.68	[R].TLETPAAQMEGFLNR.[K]	Q62261 [2191-2205]
	TLETPAAQMEGFLNR	1xOxidation [M9]	1	1	1	Q62261	0	1693.82	847.412			1.89e-07	2.15	[R].TLETPAAQMEGFLNR.[K]	Q62261 [2191-2205]	503581	29.4
	TQILAASYELHK		1	1	2	Q62261	0	1373.74	687.374			0.0001437	2.18	[R].TQILAASYELHK.[F]	Q62261 [1798-1809]	1.28253e+06	26.16
	TQTAIASEDMPNTLTEAEK	1xOxidation [M10]	1	1	1	Q62261	0	2065.96	1033.48			9.473e-05	2.12	[R].TQTAIASEDMPNTLTEAEK.[L]	Q62261 [1081-1099]
	TVEKPPKFTEK		1	1	1	Q62261	1	1303.73	435.246			0.0481	1.1	[R].TVEKPPKFTEK.[G]	Q62261 [349-359]
	VAVVNQIAR		1	1	1	Q62261	0	969.584	485.295			0.001432	2.5	[R].VAVVNQIAR.[Q]	Q62261 [905-913]	2.71443e+06	21.88
	VDKLYAGLK		1	1	1	Q62261	1	1006.59	336.201			0.04093	1.04	[K].VDKLYAGLK.[D]	Q62261 [1676-1684]	363782	20.94
	VHLENMGSHDIVDGNHR	1xOxidation [M6]	1	2	1	Q62261	0	1945.89	487.229			0.00109	2.12	[R].VHLENMGSHDIVDGNHR.[L]	Q62261 [128-144]	433006	16.64
	VLDNAIETEK		1	1	1	Q62261	0	1131.59	566.298			0.008471	1.3	[K].VLDNAIETEK.[M]	Q62261 [293-302]	1.54531e+06	20.53
	VLLLSQDYGK		1	1	1	Q62261	0	1135.64	568.323			0.0003314	2	[K].VLLLSQDYGK.[H]	Q62261 [549-558]	592640	29.5
	VQAVVAVAR		1	1	1	Q62261	0	912.563	456.785			0.002169	2.25	[R].VQAVVAVAR.[E]	Q62261 [478-486]	2.42406e+06	20.4
	WVNSHLAR		1	2	2	Q62261	0	982.522	328.177			0.0003701	2.25	[K].WVNSHLAR.[V]	Q62261 [63-70]	910451	16.94
P17427	AP-2 complex subunit alpha-2 OS=Mus musculus OX=10090 GN=Ap2a2 PE=1 SV=2	88.97	36	33	48	22	938	104	6.93
	Sequence	Modifications	# Protein Groups	# Proteins	# PSMs	Master Protein Accessions	# Missed Cleavages	Theo. MH+ [Da]	m/z [Da] (by Search Engine): Sequest HT			Percolator PEP (by Search Engine): Sequest HT	XCorr (by Search Engine): Sequest HT	Annotated Sequence	Positions in Master Proteins	Abundance: F5: Sample	Top Apex RT [min]
	AKHPMDTEITK		1	1	2	P17427	1	1270.65	424.219			3.509e-10	3.39	[K].AKHPMDTEITK.[A]	P17427 [856-866]	774632	13.02
	ATIQDVLR		1	1	1	P17427	0	915.526	458.266			0.02598	2.14	[K].ATIQDVLR.[S]	P17427 [556-563]	8460898	27.2
	EMAEAFAGEIPK		1	1	1	P17427	0	1292.62	646.81			0.001362	1.82	[R].EMAEAFAGEIPK.[I]	P17427 [142-153]	2.05979e+06	31.46
	EMAEAFAGEIPK	1xOxidation [M2]	1	1	1	P17427	0	1308.61	654.809			0.0001098	2.88	[R].EMAEAFAGEIPK.[I]	P17427 [142-153]
	FFQPTEMASQDFFQR		1	1	1	P17427	0	1878.85	939.925			7.042e-05	2.24	[K].FFQPTEMASQDFFQR.[W]	P17427 [825-839]	390283	40.02
	FFQPTEMASQDFFQR	1xOxidation [M7]	1	1	2	P17427	0	1894.84	947.925			1.053e-05	2.23	[K].FFQPTEMASQDFFQR.[W]	P17427 [825-839]	1747999	35.93
	FHLCSVPTR	1xCarbamidomethyl [C4]	1	1	1	P17427	0	1116.56	558.783			0.05824	1.52	[K].FHLCSVPTR.[A]	P17427 [529-537]
	FVNLFPEVK		1	1	2	P17427	0	1092.61	546.808			0.0004123	1.81	[K].FVNLFPEVK.[A]	P17427 [547-555]	3.10784e+06	37.89
	GPSTVTDLEETKR		1	1	2	P17427	1	1432.73	478.245			1.118e-06	2.9	[K].GPSTVTDLEETKR.[E]	P17427 [620-632]	1.53146e+06	19.49
	HPMDTEITK		1	1	1	P17427	0	1071.51	536.259			0.04287	0.86	[K].HPMDTEITK.[A]	P17427 [858-866]	290843	14.58
	KGPSTVTDLEETKR		1	1	1	P17427	2	1560.82	520.945			2.598e-10	4.81	[K].KGPSTVTDLEETKR.[E]	P17427 [619-632]	2291676	17.47
	LEPNLQAQMYR		1	1	2	P17427	0	1362.68	681.845			0.0005667	2.22	[R].LEPNLQAQMYR.[L]	P17427 [906-916]	840861	27.58
	LLQCYPPPDPAVR	1xCarbamidomethyl [C4]	1	1	1	P17427	0	1525.78	763.399			0.0002973	1.61	[R].LLQCYPPPDPAVR.[G]	P17427 [264-276]	614592	28.16
	ILVAGDTMDSVK		1	1	1	P17427	0	1248.65	624.828			0.0001108	2.36	[K].ILVAGDTMDSVK.[Q]	P17427 [154-165]	2166919	27.05
	ILVAGDTMDSVK	1xOxidation [M8]	1	1	1	P17427	0	1264.65	632.824			9.791e-06	2.62	[K].ILVAGDTMDSVK.[Q]	P17427 [154-165]	4.85595e+06	22.09
	LPITLNK		1	1	1	P17427	0	798.508	399.757			0.05921	1.78	[K].LPITLNK.[F]	P17427 [818-824]	4.73128e+06	25.15
	MFIFYGNK		1	1	1	P17427	0	1019.5	510.253			0.006233	2.24	[R].MFIFYGNK.[T]	P17427 [737-744]	1.92896e+06	33.36
	MFIFYGNK	1xOxidation [M1]	1	1	1	P17427	0	1035.5	518.249			0.01867	1.72	[R].MFIFYGNK.[T]	P17427 [737-744]	2.4447e+06	29.31
	NNGVLFENQLLQIGLK		1	1	1	P17427	0	1800	900.501			0.000893	1.56	[K].NNGVLFENQLLQIGLK.[S]	P17427 [712-727]
	QLSNPQQEVQNIFK		1	1	1	P17427	0	1672.87	836.935			5.082e-05	2.19	[K].QLSNPQQEVQNIFK.[A]	P17427 [842-855]	892609	35.63
	SSPLIQFNLLHSK		1	1	2	P17427	0	1483.83	742.416			1.085e-06	3.19	[R].SSPLIQFNLLHSK.[F]	P17427 [516-528]	3909339	35.96
	THIETVINALK		1	1	2	P17427	0	1238.71	619.858			1.734e-06	3.14	[K].THIETVINALK.[T]	P17427 [367-377]	2.2392e+06	29.37
	TSVSLAVSR		1	1	1	P17427	0	919.521	460.264			0.005435	2.41	[K].TSVSLAVSR.[L]	P17427 [224-232]	760402	21.03
	TVFEALQAPACHENLVK	1xCarbamidomethyl [C11]	1	1	2	P17427	0	1926.97	642.997			0.0004286	1.66	[K].TVFEALQAPACHENLVK.[V]	P17427 [481-497]	1.09199e+06	31.91
	VIQIVINRDDVQGYAAK		1	1	2	P17427	1	1902.04	634.686			4.819e-05	2.49	[R].VIQIVINRDDVQGYAAK.[T]	P17427 [464-480]
	YGGTFQNVSVK		1	1	1	P17427	0	1199.61	600.304			5.182e-05	2.68	[R].YGGTFQNVSVK.[L]	P17427 [807-817]	4547247	23.52
	ACNQLGQFLQHR	1xCarbamidomethyl [C2]	2	2	1	P17427; P17426	0	1471.72	491.247			0.0005367	2.62	[R].ACNQLGQFLQHR.[E]	P17427 [329-340]; P17426 [330-341]	925640	27.89
	ALDGYSK		2	2	1	P17427; P17426	0	753.378	377.191			0.08445	0.82	[K].ALDGYSK.[K]	P17427 [49-55]; P17426 [49-55]	325813	13.42
	ALLLSTYIK		2	2	1	P17427; P17426	0	1021.63	511.316			0.004612	2.2	[R].ALLLSTYIK.[F]	P17427 [538-546]; P17426 [539-547]	4.62791e+06	35.99
	ESSILAK		2	2	1	P17427; P17426	0	747.425	374.216			0.02865	1.83	[R].ESSILAK.[L]	P17427 [608-614]; P17426 [609-615]	1.30835e+06	15.35
	GLAVFISDIR		2	2	1	P17427; P17426	0	1090.63	545.816			0.0004122	2.83	[R].GLAVFISDIR.[N]	P17427 [12-21]; P17426 [12-21]	2.24942e+06	38.58
	LINNAIK		2	2	1	P17427; P17426	0	785.488	393.247			0.03455	1.84	[R].LINNAIK.[N]	P17427 [111-117]; P17426 [111-117]	2522366	17.7
	LINNAIKNDLASR		2	2	2	P17427; P17426	1	1441.81	481.276			8.598e-07	2.76	[R].LINNAIKNDLASR.[N]	P17427 [111-123]; P17426 [111-123]	499441	24
	INKELANIR		2	2	2	P17427; P17426	1	1070.63	535.818			0.01343	1.63	[R].INKELANIR.[S]	P17427 [33-41]; P17426 [33-41]	2.2665e+06	18.49
	NADVELQQR		2	2	1	P17427; P17426	0	1072.54	536.772			0.006166	2.2	[KR].NADVELQQR.[A]	P17427 [570-578]; P17426 [571-579]	3663804	16.25
	SKEAEIKR		2	2	1	P17427; P17426	2	960.547	320.852			0.000142	2.12	[K].SKEAEIKR.[I]	P17427 [25-32]; P17426 [25-32]	197060	5.37
[truncated: 7,319 more rows]

## Sheet: PM proteins
Table S2. Identification of the PRXL2A receptor by LC-MS/MS
Accession	Description	Score Sequest HT	Coverage [%]	# Peptides	# Unique Peptides	# AAs	MW [kDa]	calc. pI
Q01279	Epidermal growth factor receptor OS=Mus musculus OX=10090 GN=Egfr PE=1 SV=1	13.91	8	9	9	1210	134.8	6.86
Q62035	Platelet-activating factor receptor OS=Mus musculus OX=10090 GN=Ptafr PE=1 SV=1	14.25	17	5	5	341	39.1	8.76
Q5QR91	Uncharacterized protein C17orf78 homolog OS=Mus musculus OX=10090 GN=Gm11437 PE=2 SV=2	20.44	16	5	5	290	32.6	9.48
P34927	Asialoglycoprotein receptor 1 OS=Mus musculus OX=10090 GN=Asgr1 PE=1 SV=4	8.26	14	4	4	284	32.6	6.44
P28230	Gap junction beta-1 protein OS=Mus musculus OX=10090 GN=Gjb1 PE=1 SV=3	13.61	14	4	4	283	32	8.95
Q9QY30	Bile salt export pump OS=Mus musculus OX=10090 GN=Abcb11 PE=1 SV=2	40.32	17	21	21	1321	146.7	7.66
Q8VDN2	Sodium/potassium-transporting ATPase subunit alpha-1 OS=Mus musculus OX=10090 GN=Atp1a1 PE=1 SV=1	51.67	27	24	24	1023	112.9	5.45
Q9QXZ6	Solute carrier organic anion transporter family member 1A1 OS=Mus musculus OX=10090 GN=Slco1a1 PE=1 SV=1	6.22	9	6	6	670	74.3	8.22
P14094	Sodium/potassium-transporting ATPase subunit beta-1 OS=Mus musculus OX=10090 GN=Atp1b1 PE=1 SV=1	15.29	16	5	5	304	35.2	8.65
Q9DCP2	Sodium-coupled neutral amino acid transporter 3 OS=Mus musculus OX=10090 GN=Slc38a3 PE=1 SV=1	11.46	10	4	4	505	55.6	7.09
P58735	Sulfate anion transporter 1 OS=Mus musculus OX=10090 GN=Slc26a1 PE=1 SV=1	11.09	7	4	4	704	75.7	8.09
